# Supplementary material for: The impact of the COVID-19 pandemic and associated lifestyle changes on early-life microbiome development: a natural experiment
Source: Research Square preprint supplement (doi:10.21203/rs.3.rs-7565364/v1), 2025-10-08
Supplement: Supplementary file 1 [file 214d60d05c79c12f774d9fdc.xlsx]

## Sheet: Tbl1_sample_count
Supplementary Table 1A. Number of samples collected before and after the start of the COVID-19 pandemic in the Netherlands.
Age	Pre-pandemic	Pandemic	Total (n)
1 week	60	24	84
4 weeks	54	28	82
8 weeks	73	32	105
4 months	76	27	103
5 months	65	31	96
6 months	59	29	88
9 months	63	29	92
11 months	56	27	83
14 months	49	26	75
all samples	555	253	808
Supplementary Table 1B. Number of samples from 36 families with exposure data, collected before or after the start of the pandemic
Age	Pre-pandemic	Pandemic	Total (n)
1 week	3	21	24
4 weeks	2	23	25
8 weeks	2	29	31
4 months	1	25	26
5 months	1	29	30
6 months	1	26	27
9 months	0	28	28
11 months	0	26	26
14 months	0	25	25
all samples	10	232	242

## Sheet: Tbl2_var_cohort
Supplementary Table 2. Frequencies of categorical and numeric variables in the cohort (n=139).
Variable	Yes (%)	No (%)	Missing (%)
Admission to hospital after birth	62 (44.6%)	76 (54.7%)	1 (0.7%)
Daycare at 14 months*	75 (54%)	30 (21.6%)	34 (24.5%)
Daycare at 6 months*	75 (54%)	44 (31.7%)	20 (14.4%)
Father's atopy	74 (53.2%)	64 (46%)	1 (0.7%)
Furry pets at 14 months*	34 (24.5%)	84 (60.4%)	21 (15.1%)
Furry pets at 6 months*	48 (34.5%)	89 (64%)	2 (1.4%)
Maternal antibiotics at delivery	16 (11.5%)	122 (87.8%)	1 (0.7%)
Maternal antibiotics at pregnancy	19 (13.7%)	119 (85.6%)	1 (0.7%)
Mother's atopy	79 (56.8%)	59 (42.4%)	1 (0.7%)
Older siblings	59 (42.4%)	79 (56.8%)	1 (0.7%)
Smoking before pregnancy	23 (16.5%)	115 (82.7%)	1 (0.7%)
Smoking during pregnancy	0	139 (100%)	0
Twins or siblings in Lucky study	24 (17.3%)	115 (82.7%)	0
	At home (%)	Hospital (%)	NA (%)
Delivery place	17 (12.2%)	121 (87.1%)	1 (0.7%)
	Vaginal (%)	Caesarean section (%)	NA (%)
Delivery type	117 (84.2%)	21 (15.1%)	1 (0.7%)
	Female (%)	Male (%)
Sex	59 (42.4%)	80 (57.6%)
	Mean	SD
Birth weight (g)	3444.06	452.439
	Median	IQR
Gestational age (wks)	40	1.5
Introduction of solids (wks)	18	4
Maternal weight gain (kg)	14	6
*Missings are in part because not all infants reached the age of 6 or 14 months at the data lock data for this study.

## Sheet: Tbl3_categ_per_TP
Supplementary Table 3. Frequencies of categorical variables per time point.
Antibiotics at	No	NA	Yes	Total (n)
1-2 week*	78 (92.9%)	2 (2.4%)	4 (4.8%)	84
4 weeks*	76 (92.7%)	5 (6.1%)	1 (1.2%)	82
8 weeks*	101 (96.2%)	3 (2.9%)	1 (1%)	105
4 months*	101 (98.1%)	1 (1%)	1 (1%)	103
5 months*	92 (95.8%)	3 (3.1%)	1 (1%)	96
6 months*	80 (90.9%)	5 (5.7%)	3 (3.4%)	88
9 months	74 (80.4%)	4 (4.3%)	14 (15.2%)	92
11 months	74 (89.2%)	3 (3.6%)	6 (7.2%)	83
14 months	66 (88%)	3 (4%)	6 (8%)	75
* not used in analysis, as amount of yes answers was less than 5%
Breastfeeding at	Yes	No	NA	Total (n)
1-2 week	74 (88.1%)	9 (10.7%)	1 (1.2%)	84
4 weeks	60 (73.2%)	21 (25.6%)	1 (1.2%)	82
8 weeks	80 (76.2%)	25 (23.8%)		105
4 months	68 (66%)	35 (34%)		103
5 months	51 (53.1%)	45 (46.9%)		96
6 months	46 (52.3%)	42 (47.7%)		88
9 months	40 (43.5%)	52 (56.5%)		92
11 months	34 (41%)	49 (59%)		83
14 months	25 (33.3%)	50 (66.7%)		75
Formula feeding at	Yes	No	NA	Total (n)
1-2 week	32 (38.1%)	51 (60.7%)	1 (1.2%)	84
4 weeks	34 (41.5%)	47 (57.3%)	1 (1.2%)	82
8 weeks	51 (48.6%)	54 (51.4%)		105
4 months	58 (56.3%)	45 (43.7%)		103
5 months	58 (60.4%)	38 (39.6%)		96
6 months	57 (64.8%)	31 (35.2%)		88
9 months	78 (84.8%)	14 (15.2%)		92
11 months	66 (79.5%)	17 (20.5%)		83
14 months	60 (80%)	15 (20%)		75
Samples collected during Covid19	Yes	No	Total (n)
1-2 week	24 (28.6%)	60 (71.4%)	84
4 weeks	28 (34.1%)	54 (65.9%)	82
8 weeks	32 (30.5%)	73 (69.5%)	105
4 months	27 (26.2%)	76 (73.8%)	103
5 months	31 (32.3%)	65 (67.7%)	96
6 months	29 (33%)	59 (67%)	88
9 months	29 (31.5%)	63 (68.5%)	92
11 months	27 (32.5%)	56 (67.5%)	83
14 months	26 (34.7%)	49 (65.3%)	75

## Sheet: Tbl4_index_var
	Supplementary Table 4. Summary of response frequencies for questions related to societal interactions, lifestyle and hygiene measures.
Work_var	Original variable	Answers	Exposure index coding	Freq (%)
	Keeping 1.5 m distance at home	often	2	18 (50%)
		sometimes	3	6 (16.7%)
		mostly not	4	8 (22.2%)
		always	1	3 (8.3%)
		no contact	0	1 (2.8%)
	child 1.5m distance? Adults	often	2	8 (22.2%)
		sometimes	3	7 (19.4%)
		mostly not	4	7 (19.4%)
		always	1	4 (11.1%)
		no contact	0	1 (2.8%)
		never	5	9 (25%)
	child 1.5m distance? Children	often	2	6 (16.7%)
		sometimes	3	6 (16.7%)
		mostly not	4	6 (16.7%)
		always	1	8 (22.2%)
		no contact	0	1 (2.8%)
		never	5	8 (22.2%)
		NA	0	1 (2.8%)
	Keeping 1.5 m distance outside own home	often	2	21 (58.3%)
		sometimes	3	3 (8.3%)
		mostly not	4	2 (5.6%)
		always	1	7 (19.4%)
		no contact	0	3 (8.3%)
	child 1.5m distance? Adults	often	2	16 (44.4%)
		sometimes	3	2 (5.6%)
		mostly not	4	5 (13.9%)
		always	1	8 (22.2%)
		no contact	0	3 (8.3%)
		never	5	2 (5.6%)
	child 1.5m distance? Children	often	2	8 (22.2%)
		sometimes	3	6 (16.7%)
		mostly not	4	6 (16.7%)
		always	1	9 (25%)
		no contact	0	3 (8.3%)
		never	5	4 (11.1%)
	Mother: Do you use protection (mask) in indoor public spaces?	often	2	1 (2.8%)
		sometimes	3	1 (2.8%)
		mostly not	4	6 (16.7%)
		always	1	3 (8.3%)
		no contact	0	8 (22.2%)
		never	5	17 (47.2%)
	Mother: keeping 1.5 m distance indoor public spaces	often	2	14 (38.9%)
		sometimes	3	3 (8.3%)
		always	1	10 (27.8%)
		no contact	0	8 (22.2%)
		NA	0	1 (2.8%)
	Father: Do you use protection (mask) in indoor public spaces?	sometimes	3	2 (5.6%)
		mostly not	4	4 (11.1%)
		always	1	2 (5.6%)
		no contact	0	7 (19.4%)
		never	5	17 (47.2%)
		NA	omitted	4 (11.1%)
	Father: keeping 1.5 m distance indoor public spaces	often	2	10 (27.8%)
		sometimes	3	5 (13.9%)
		always	1	8 (22.2%)
		no contact	0	7 (19.4%)
		never	5	2 (5.6%)
		NA	omitted	4 (11.1%)
	Mother: keeping 1.5 m distance outdoor public spaces	often	2	9 (25%)
		sometimes	3	3 (8.3%)
		mostly not	4	1 (2.8%)
		always	1	4 (11.1%)
		no contact	0	19 (52.8%)
	Father: Do you use protection (mask) in outdoor public spaces?	mostly not	4	1 (2.8%)
		no contact	0	17 (47.2%)
		never	5	14 (38.9%)
		NA	omitted	4 (11.1%)
	Father: keeping 1.5 m distance outdoor public spaces	often	2	5 (13.9%)
		sometimes	3	4 (11.1%)
		always	1	5 (13.9%)
		no contact	0	17 (47.2%)
		never	5	1 (2.8%)
	Mother: wearing a protection (mask) inside others' home	mostly not	4	7 (19.4%)
		always	1	1 (2.8%)
		no contact	0	8 (22.2%)
		never	5	20 (55.6%)
	Mother: keeping 1.5 m distance inside others' home	often	2	10 (27.8%)
		sometimes	3	11 (30.6%)
		mostly not	4	3 (8.3%)
		always	1	2 (5.6%)
		no contact	0	8 (22.2%)
		never	5	2 (5.6%)
	Father: wearing a protection (mask) inside others' home	mostly not	4	3 (8.3%)
		no contact	0	9 (25%)
		never	5	20 (55.6%)
		NA	omitted	4 (11.1%)
	Father: keeping 1.5 m distance inside others' home	often	2	8 (22.2%)
		sometimes	3	7 (19.4%)
		mostly not	4	3 (8.3%)
		always	1	3 (8.3%)
		no contact	0	9 (25%)
		never	5	2 (5.6%)
		NA	omitted	4 (11.1%)
	Mother: keeping 1.5 m distance outside others' home	often	2	9 (25%)
		sometimes	3	6 (16.7%)
		mostly not	4	1 (2.8%)
		always	1	4 (11.1%)
		no contact	0	14 (38.9%)
		never	5	2 (5.6%)
	Father: keeping 1.5 m distance outside others' home	often	2	7 (19.4%)
		sometimes	3	5 (13.9%)
		mostly not	4	2 (5.6%)
		always	1	4 (11.1%)
		no contact	0	12 (33.3%)
		never	5	2 (5.6%)
		NA	omitted	4 (11.1%)
	Father: Do you use protection (mask, gloves) at work?	often	2	5 (13.9%)
		sometimes	3	3 (8.3%)
		mostly not	4	6 (16.7%)
		always	1	3 (8.3%)
		no contact	0	8 (22.2%)
		never	5	7 (19.4%)
		NA	omitted	4 (11.1%)
	Father: keeping 1.5 m distance at work	often	2	7 (19.4%)
		sometimes	3	7 (19.4%)
		mostly not	4	3 (8.3%)
		always	1	6 (16.7%)
		no contact	0	8 (22.2%)
		never	5	1 (2.8%)
		NA	omitted	4 (11.1%)
	Father: Do you use other protection (screen) at work?	often	2	4 (11.1%)
		mostly not	4	5 (13.9%)
		no contact	0	8 (22.2%)
		never	5	15 (41.7%)
		NA	omitted	4 (11.1%)
	Mother: Do you use protection (mask, gloves) at work?	sometimes	3	1 (2.8%)
		mostly not	4	4 (11.1%)
		always	1	2 (5.6%)
		no contact	0	19 (52.8%)
		never	5	10 (27.8%)
	Mother: keeping 1.5 m distance at work	often	2	7 (19.4%)
		sometimes	3	2 (5.6%)
		mostly not	4	3 (8.3%)
		always	1	4 (11.1%)
		no contact	0	19 (52.8%)
		never	5	1 (2.8%)
	How often do you contact with others in your own home?	contact on 3-4 days/week	2	14 (38.9%)
		contact on 1-2 days/week	1	21 (58.3%)
		no contact	0	1 (2.8%)
	How often contact with other people outside of own home?	contact on 3-4 days/week	2	7 (19.4%)
		contact on 1-2 days/week	1	25 (69.4%)
		no contact	0	3 (8.3%)
		contact on 5 or more days/week	3	1 (2.8%)
	Mother: How often do you have contact with other people in indoor public spaces?	contact on 3-4 days/week	2	4 (11.1%)
		contact on 1-2 days/week	1	24 (66.7%)
		no contact	0	8 (22.2%)
	Father: How often do you have contact with other people in indoor public spaces?	contact on 3-4 days/week	2	7 (19.4%)
		contact on 1-2 days/week	1	18 (50%)
		no contact	0	7 (19.4%)
		NA	omitted	4 (11.1%)
	Mother: How often do you have contact with other people in outdoor public spaces?	contact on 3-4 days/week	2	2 (5.6%)
		contact on 1-2 days/week	1	14 (38.9%)
		no contact	0	19 (52.8%)
		contact on 5 or more days/week	3	1 (2.8%)
	Father: How often do you have contact with other people in outdoor public spaces?	contact on 3-4 days/week	2	3 (8.3%)
		contact on 1-2 days/week	1	11 (30.6%)
		no contact	0	17 (47.2%)
		contact on 5 or more days/week	3	1 (2.8%)
		NA	omitted	4 (11.1%)
	Mother: How often do you have contact with other people inside their home?	contact on 3-4 days/week	2	2 (5.6%)
		contact on 1-2 days/week	1	26 (72.2%)
		no contact	0	8 (22.2%)
	Father: How often do you have contact with other people inside their home?	contact on 3-4 days/week	2	4 (11.1%)
		contact on 1-2 days/week	1	19 (52.8%)
		no contact	0	9 (25%)
		NA	omitted	4 (11.1%)
	Mother: How often contact other people outside theirs home?	contact on 3-4 days/week	2	4 (11.1%)
		contact on 1-2 days/week	1	18 (50%)
		no contact	0	14 (38.9%)
	Father: How often contact other people outside theirs home?	contact on 3-4 days/week	2	4 (11.1%)
		contact on 1-2 days/week	1	16 (44.4%)
		no contact	0	12 (33.3%)
		NA	omitted	4 (11.1%)
	Father: washing hands with water (times per day)	1-2 times/day	7	3 (8.3%)
		NA	omitted	4 (11.1%)
		5-10 times/day	5	4 (11.1%)
		(almost) never	8	18 (50%)
		3-4 times/day	6	7 (19.4%)
	Father: washing hands with disinfectant (times per day)	1-2 times/day	7	10 (27.8%)
		NA	omitted	4 (11.1%)
		5-10 times/day	5	3 (8.3%)
		(almost) never	8	8 (22.2%)
		3-4 times/day	6	7 (19.4%)
		>25 times/day	1	1 (2.8%)
		21-25 times/day	2	1 (2.8%)
		11-15 times/day	4	2 (5.6%)
	Father: washing hands with water and soap (times per day)	1-2 times/day	7	4 (11.1%)
		NA	omitted	4 (11.1%)
		5-10 times/day	5	15 (41.7%)
		3-4 times/day	6	6 (16.7%)
		21-25 times/day	2	1 (2.8%)
		11-15 times/day	4	6 (16.7%)
	Mother: washing hands with water (times per day)	1-2 times/day	7	4 (11.1%)
		5-10 times/day	5	6 (16.7%)
		(almost) never	8	21 (58.3%)
		3-4 times/day	6	4 (11.1%)
		11-15 times/day	4	1 (2.8%)
	Mother: washing hands with disinfectant (times per day)	1-2 times/day	7	11 (30.6%)
		5-10 times/day	5	5 (13.9%)
		(almost) never	8	12 (33.3%)
		3-4 times/day	6	6 (16.7%)
		11-15 times/day	4	2 (5.6%)
	Mother: washing hands with water and soap (times per day)	1-2 times/day	7	2 (5.6%)
		5-10 times/day	5	21 (58.3%)
		3-4 times/day	6	5 (13.9%)
		11-15 times/day	4	6 (16.7%)
		16-20 times/day	3	2 (5.6%)
	Father: essential occupation: education (secondary school OR primary school) OR medical profession outside hospital OR medical profession in hospital OR daycare worker OR other contact profession	yes	1	10 (27.8%)
		no	0	26 (72.2%)
	Mother: essential occupation: education (secondary school OR primary school) OR medical profession outside hospital OR medical profession in hospital OR daycare worker OR other contact profession	yes	1	20 (55.6%)
		no	0	16 (44.4%)
	Mother: How often do you have contact with other people at work?	I'm not working at the moment	0	16 (44.4%)
		Often I'm at work at the office (3-4 days/week)	3	7 (19.4%)
		On occasion I'm at work at the office (1-2 days/week)	2	6 (16.7%)
		I work from home (100%)	1	3 (8.3%)
		Always I'm at work at the office (5 days/week)	4	4 (11.1%)
	Father: How often do you have contact with other people at work?	I'm not working at the moment	0	1 (2.8%)
		Often I'm at work at the office (3-4 days/week)	3	5 (13.9%)
		On occasion I'm at work at the office (1-2 days/week)	2	8 (22.2%)
		I work from home (100%)	1	7 (19.4%)
		Always I'm at work at the office (5 days/week)	4	11 (30.6%)
		NA	omitted	4 (11.1%)

## Sheet: Tbl5_index_var_new
Supplementary Table 5. Combining original variables into new ones to create an exposure index.
Original variable	New variable for the index
Father: essential occupation	Father: essential job
Father: washing hands with water (times per day)	Father: low hygiene
Father: washing hands with disinfectant (times per day)	Father: low hygiene
Father: washing hands with water and soap (times per day)	Father: low hygiene
Father: Do you use protection (mask, gloves) at work?	Father: Protective gear at work
Father: keeping 1.5 m distance at work	Father: Protective gear at work
Father: Do you use other protection (screen) at work?	Father: Protective gear at work
Father: How often do you have contact with other people at work?	Father: Social interactions at work
Father: Do you use protection (mask) in indoor public spaces?	Father: Social interactions indoor public spaces
Father: keeping 1.5 m distance indoor public spaces	Father: Social interactions indoor public spaces
Father: How often do you have contact with other people in indoor public spaces?	Father: Social interactions indoor public spaces
Father: wearing a protection (mask) inside others' home	Father: Social interactions inside other's home
Father: keeping 1.5 m distance inside others' home	Father: Social interactions inside other's home
Father: How often do you have contact with other people inside their home?	Father: Social interactions inside other's home
Father: Do you use protection (mask) in outdoor public spaces?	Father: Social interactions outdoor public spaces
Father: keeping 1.5 m distance outdoor public spaces	Father: Social interactions outdoor public spaces
Father: How often do you have contact with other people in outdoor public spaces?	Father: Social interactions outdoor public spaces
Father: keeping 1.5 m distance outside others' home	Father: Social interactions outside other's home
Father: How often contact other people outside theirs home?	Father: Social interactions outside other's home
Mother: essential occupation	Mother: essential job
Mother: washing hands with water (times per day)	Mother: low hygiene
Mother: washing hands with disinfectant (times per day)	Mother: low hygiene
Mother: washing hands with water and soap (times per day)	Mother: low hygiene
Mother: Do you use protection (mask, gloves) at work?	Mother: Protective gear at work
Mother: keeping 1.5 m distance at work	Mother: Protective gear at work
Mother: How often do you have contact with other people at work?	Mother: Social interactions at work
Mother: Do you use protection (mask) in indoor public spaces?	Mother: Social interactions indoor public spaces
Mother: keeping 1.5 m distance indoor public spaces	Mother: Social interactions indoor public spaces
Mother: How often do you have contact with other people in indoor public spaces?	Mother: Social interactions indoor public spaces
Mother: wearing a protection (mask) inside others' home	Mother: Social interactions inside other's home
Mother: keeping 1.5 m distance inside others' home	Mother: Social interactions inside other's home
Mother: How often do you have contact with other people inside their home?	Mother: Social interactions inside other's home
Mother: keeping 1.5 m distance outdoor public spaces	Mother: Social interactions outdoor public spaces
Mother: How often do you have contact with other people in outdoor public spaces?	Mother: Social interactions outdoor public spaces
Mother: keeping 1.5 m distance outside others' home	Mother: Social interactions outside other's home
Mother: How often contact other people outside theirs home?	Mother: Social interactions outside other's home
Keeping 1.5 m distance outside own home	Social interactions outside home
child 1.5m distance? adults	Social interactions outside home
child 1.5m distance? children	Social interactions outside home
How often contact with other people outside of own home?	Social interactions outside home
Keeping 1.5 m distance at home	Social interactions within home
child 1.5m distance? adults	Social interactions within home
child 1.5m distance? children	Social interactions within home
How often do you contact with others in your own home?	Social interactions within home

## Sheet: Tbl6 - PERMANOVA sensitivity
Supplementary Table 6. PERMANOVA sensitivity analysis.
Df	SumOfSqs	R2	F	P-value	Run	Age	Variables	Significance	Term	Exposure categories
1	1145.38	0.0115639	1.03811	0.379	1	1 week	Father's atopy		atopy_father	Parental
1	1391.41	0.0140479	1.2611	0.1285	1	1 week	Mother's atopy		atopy_mother	Parental
1	1356.35	0.0136938	1.22932	0.1452	1	1 week	Birth weight		birthweight	Perinatal
1	2063.98	0.0208382	1.87068	0.0043	1	1 week	Breastfeeding	**	breastfeeding_1_2w	Dietary
1	986.215	0.00995694	0.893853	0.6524	1	1 week	Collected during pandemic		covid_270220	Environmental
1	972.191	0.00981535	0.881142	0.6719	1	1 week	Delivery place		delivery_place	Perinatal
1	2208.78	0.0223001	2.00192	0.0009	1	1 week	Delivery type	***	delivery_type	Perinatal
1	2210.4	0.0223164	2.00339	0.0021	1	1 week	Formulafeeding	**	formulafeeding_1_2w	Dietary
1	946.538	0.00955636	0.857892	0.715	1	1 week	Pets		furrypet_home_yn_6m	Environmental
1	921.289	0.00930144	0.835008	0.7589	1	1 week	Hospitalisation		hospital	Perinatal
1	1217.38	0.0122908	1.10337	0.2857	1	1 week	Intrapartum antibiotics		mat_AB_use_final_delivery	Parental
1	1018.88	0.0102867	0.923459	0.5763	1	1 week	Antepartum antibiotics		mat_AB_use_final_preg	Parental
1	2330.22	0.0235261	2.11199	0.0008	1	1 week	Maternal weight gain	***	mat_weightgain	Parental
1	1671.93	0.01688	1.51535	0.0278	1	1 week	Older siblings	*	older_siblings	Environmental
1	1563.14	0.0157816	1.41674	0.0475	1	1 week	Gestational age	*	pregn_weeks	Perinatal
1	1364.99	0.0137811	1.23716	0.1382	1	1 week	Sex		sex	Perinatal
1	1194.02	0.0120549	1.08219	0.3061	1	1 week	Prenatal smoking		smoke_before_preg	Parental
1	1140.37	0.0115133	1.03357	0.3898	1	1 week	Siblings in cohort		twins.siblings_in_lucki	Environmental
4	4542.4	0.0458606	1.02925	0.3769	1	1 week	Sequencing batch		bioinfo_batch	Technical variable
1	1162.54	0.0117372	1.05652	0.3453	2	1 week	Father's atopy		atopy_father	Parental
1	1418.43	0.0143207	1.28908	0.1111	2	1 week	Mother's atopy		atopy_mother	Parental
1	1422.11	0.0143578	1.29242	0.1007	2	1 week	Birth weight		birthweight	Perinatal
1	2039.01	0.0205861	1.85306	0.0046	2	1 week	Breastfeeding	**	breastfeeding_1_2w	Dietary
1	967.604	0.00976904	0.879363	0.6814	2	1 week	Collected during pandemic		covid_270220	Environmental
1	971.652	0.00980991	0.883043	0.6626	2	1 week	Delivery place		delivery_place	Perinatal
1	2274.97	0.0229684	2.06751	0.0009	2	1 week	Delivery type	***	delivery_type	Perinatal
1	2143.46	0.0216407	1.94799	0.0026	2	1 week	Formulafeeding	**	formulafeeding_1_2w	Dietary
1	950.773	0.00959911	0.864068	0.7049	2	1 week	Pets		furrypet_home_yn_6m	Environmental
1	1231.8	0.0124364	1.11947	0.2641	2	1 week	Intrapartum antibiotics		mat_AB_use_final_delivery	Parental
1	1025.34	0.010352	0.931836	0.5615	2	1 week	Antepartum antibiotics		mat_AB_use_final_preg	Parental
1	2264.55	0.0228631	2.05803	0.0014	2	1 week	Maternal weight gain	**	mat_weightgain	Parental
1	1601.98	0.0161738	1.45589	0.0407	2	1 week	Older siblings	*	older_siblings	Environmental
1	1538.2	0.0155298	1.39792	0.0525	2	1 week	Gestational age		pregn_weeks	Perinatal
1	1368.69	0.0138184	1.24387	0.1346	2	1 week	Sex		sex	Perinatal
1	1196.38	0.0120788	1.08727	0.2995	2	1 week	Prenatal smoking		smoke_before_preg	Parental
1	1120.55	0.0113132	1.01836	0.415	2	1 week	Siblings in cohort		twins.siblings_in_lucki	Environmental
4	4529.19	0.0457272	1.02904	0.3758	2	1 week	Sequencing batch		bioinfo_batch	Technical variable
1	1156.19	0.011673	1.05306	0.3492	3	1 week	Father's atopy		atopy_father	Parental
1	1397.63	0.0141106	1.27296	0.1232	3	1 week	Mother's atopy		atopy_mother	Parental
1	1383.4	0.013967	1.26001	0.1245	3	1 week	Birth weight		birthweight	Perinatal
1	1960.45	0.019793	1.78559	0.0065	3	1 week	Breastfeeding	**	breastfeeding_1_2w	Dietary
1	973.607	0.00982965	0.886763	0.6666	3	1 week	Collected during pandemic		covid_270220	Environmental
1	959.392	0.00968614	0.873817	0.6796	3	1 week	Delivery place		delivery_place	Perinatal
1	2350.94	0.0237354	2.14124	0.0003	3	1 week	Delivery type	***	delivery_type	Perinatal
1	2137.65	0.021582	1.94698	0.0031	3	1 week	Formulafeeding	**	formulafeeding_1_2w	Dietary
1	1255.43	0.012675	1.14345	0.2346	3	1 week	Intrapartum antibiotics		mat_AB_use_final_delivery	Parental
1	1037.29	0.0104726	0.944766	0.5367	3	1 week	Antepartum antibiotics		mat_AB_use_final_preg	Parental
1	2191.67	0.0221274	1.99618	0.0022	3	1 week	Maternal weight gain	**	mat_weightgain	Parental
1	1539.98	0.0155478	1.40261	0.0539	3	1 week	Older siblings		older_siblings	Environmental
1	1516.65	0.0153123	1.38137	0.0586	3	1 week	Gestational age		pregn_weeks	Perinatal
1	1370.34	0.0138351	1.24811	0.1318	3	1 week	Sex		sex	Perinatal
1	1295.5	0.0130795	1.17995	0.1836	3	1 week	Prenatal smoking		smoke_before_preg	Parental
1	1120.83	0.011316	1.02085	0.4103	3	1 week	Siblings in cohort		twins.siblings_in_lucki	Environmental
4	4541.29	0.0458493	1.03405	0.3636	3	1 week	Sequencing batch		bioinfo_batch	Technical variable
1	1146.4	0.0115742	1.04624	0.3671	4	1 week	Father's atopy		atopy_father	Parental
1	1422.08	0.0143575	1.29783	0.1064	4	1 week	Mother's atopy		atopy_mother	Parental
1	1272.95	0.0128518	1.16173	0.2079	4	1 week	Birth weight		birthweight	Perinatal
1	2018.13	0.0203753	1.84181	0.0056	4	1 week	Breastfeeding	**	breastfeeding_1_2w	Dietary
1	981.328	0.0099076	0.89559	0.6508	4	1 week	Collected during pandemic		covid_270220	Environmental
1	2350.42	0.0237302	2.14507	0.0003	4	1 week	Delivery type	***	delivery_type	Perinatal
1	2148.59	0.0216924	1.96087	0.0027	4	1 week	Formulafeeding	**	formulafeeding_1_2w	Dietary
1	1251.42	0.0126345	1.14209	0.2382	4	1 week	Intrapartum antibiotics		mat_AB_use_final_delivery	Parental
1	1018.23	0.0102802	0.929267	0.5676	4	1 week	Antepartum antibiotics		mat_AB_use_final_preg	Parental
1	2257.39	0.0227909	2.06017	0.0015	4	1 week	Maternal weight gain	**	mat_weightgain	Parental
1	1621.73	0.0163732	1.48004	0.0338	4	1 week	Older siblings	*	older_siblings	Environmental
1	1432.94	0.0144671	1.30774	0.0903	4	1 week	Gestational age		pregn_weeks	Perinatal
1	1355.42	0.0136845	1.237	0.1403	4	1 week	Sex		sex	Perinatal
1	1262.99	0.0127513	1.15265	0.2134	4	1 week	Prenatal smoking		smoke_before_preg	Parental
1	1116.11	0.0112683	1.01859	0.4149	4	1 week	Siblings in cohort		twins.siblings_in_lucki	Environmental
4	4415.24	0.0445768	1.00737	0.4508	4	1 week	Sequencing batch		bioinfo_batch	Technical variable
1	1178.78	0.0119011	1.07754	0.3166	5	1 week	Father's atopy		atopy_father	Parental
1	1433	0.0144677	1.30994	0.0993	5	1 week	Mother's atopy		atopy_mother	Parental
1	1299.15	0.0131164	1.18759	0.184	5	1 week	Birth weight		birthweight	Perinatal
1	2038.86	0.0205846	1.86377	0.0053	5	1 week	Breastfeeding	**	breastfeeding_1_2w	Dietary
1	2368.48	0.0239125	2.16508	0.0002	5	1 week	Delivery type	***	delivery_type	Perinatal
1	2145.33	0.0216595	1.96109	0.0027	5	1 week	Formulafeeding	**	formulafeeding_1_2w	Dietary
1	1277.66	0.0128994	1.16793	0.2082	5	1 week	Intrapartum antibiotics		mat_AB_use_final_delivery	Parental
1	1082.38	0.0109278	0.989427	0.4551	5	1 week	Antepartum antibiotics		mat_AB_use_final_preg	Parental
1	2254.69	0.0227636	2.06106	0.0015	5	1 week	Maternal weight gain	**	mat_weightgain	Parental
1	1564.28	0.0157931	1.42994	0.0447	5	1 week	Older siblings	*	older_siblings	Environmental
1	1441.55	0.0145541	1.31775	0.0834	5	1 week	Gestational age		pregn_weeks	Perinatal
1	1353.27	0.0136628	1.23705	0.1406	5	1 week	Sex		sex	Perinatal
1	1262.07	0.012742	1.15369	0.2115	5	1 week	Prenatal smoking		smoke_before_preg	Parental
1	1115.84	0.0112656	1.02001	0.4129	5	1 week	Siblings in cohort		twins.siblings_in_lucki	Environmental
4	4517.73	0.0456115	1.03244	0.3691	5	1 week	Sequencing batch		bioinfo_batch	Technical variable
1	1154.93	0.0116603	1.05592	0.353	6	1 week	Father's atopy		atopy_father	Parental
1	1434.84	0.0144864	1.31184	0.0981	6	1 week	Mother's atopy		atopy_mother	Parental
1	1298.54	0.0131102	1.18721	0.184	6	1 week	Birth weight		birthweight	Perinatal
1	2048.29	0.0206798	1.87269	0.0048	6	1 week	Breastfeeding	**	breastfeeding_1_2w	Dietary
1	2363.26	0.0238597	2.16066	0.0002	6	1 week	Delivery type	***	delivery_type	Perinatal
1	2141.04	0.0216161	1.95749	0.0028	6	1 week	Formulafeeding	**	formulafeeding_1_2w	Dietary
1	1321.57	0.0133427	1.20827	0.1717	6	1 week	Intrapartum antibiotics		mat_AB_use_final_delivery	Parental
1	2242.97	0.0226453	2.05068	0.0016	6	1 week	Maternal weight gain	**	mat_weightgain	Parental
1	1563.39	0.0157842	1.42936	0.0452	6	1 week	Older siblings	*	older_siblings	Environmental
1	1431.98	0.0144574	1.30922	0.0891	6	1 week	Gestational age		pregn_weeks	Perinatal
1	1351.74	0.0136474	1.23586	0.141	6	1 week	Sex		sex	Perinatal
1	1264.35	0.012765	1.15595	0.2096	6	1 week	Prenatal smoking		smoke_before_preg	Parental
1	1122.49	0.0113327	1.02625	0.4032	6	1 week	Siblings in cohort		twins.siblings_in_lucki	Environmental
4	4513.96	0.0455735	1.03175	0.3709	6	1 week	Sequencing batch		bioinfo_batch	Technical variable
1	1216.97	0.0122867	1.1122	0.2674	7	1 week	Father's atopy		atopy_father	Parental
1	1481.54	0.0149578	1.35399	0.0751	7	1 week	Mother's atopy		atopy_mother	Parental
1	1259.94	0.0127205	1.15146	0.2199	7	1 week	Birth weight		birthweight	Perinatal
1	2060.53	0.0208033	1.88313	0.0046	7	1 week	Breastfeeding	**	breastfeeding_1_2w	Dietary
1	2404.57	0.0242768	2.19755	0.0002	7	1 week	Delivery type	***	delivery_type	Perinatal
1	2100.7	0.0212089	1.91985	0.0033	7	1 week	Formulafeeding	**	formulafeeding_1_2w	Dietary
1	1278.73	0.0129102	1.16864	0.2082	7	1 week	Intrapartum antibiotics		mat_AB_use_final_delivery	Parental
1	2281.46	0.0230339	2.08505	0.0014	7	1 week	Maternal weight gain	**	mat_weightgain	Parental
1	1560.65	0.0157565	1.42628	0.0471	7	1 week	Older siblings	*	older_siblings	Environmental
1	1453.71	0.0146768	1.32855	0.079	7	1 week	Gestational age		pregn_weeks	Perinatal
1	1360.73	0.0137381	1.24358	0.1371	7	1 week	Sex		sex	Perinatal
1	1265.61	0.0127777	1.15665	0.2094	7	1 week	Prenatal smoking		smoke_before_preg	Parental
4	4531.15	0.045747	1.03526	0.3592	7	1 week	Sequencing batch		bioinfo_batch	Technical variable
1	1297.36	0.0130983	1.18328	0.1876	8	1 week	Father's atopy		atopy_father	Parental
1	1507.91	0.015224	1.37532	0.0652	8	1 week	Mother's atopy		atopy_mother	Parental
1	1209.81	0.0122144	1.10343	0.2754	8	1 week	Birth weight		birthweight	Perinatal
1	1988.51	0.0200762	1.81366	0.006	8	1 week	Breastfeeding	**	breastfeeding_1_2w	Dietary
1	2573.64	0.0259838	2.34734	0.0001	8	1 week	Delivery type	***	delivery_type	Perinatal
1	2092.69	0.0211281	1.90868	0.0033	8	1 week	Formulafeeding	**	formulafeeding_1_2w	Dietary
1	1177.69	0.0118901	1.07413	0.3272	8	1 week	Intrapartum antibiotics		mat_AB_use_final_delivery	Parental
1	2353.6	0.0237622	2.14665	0.001	8	1 week	Maternal weight gain	**	mat_weightgain	Parental
1	1786.01	0.0180317	1.62896	0.0119	8	1 week	Older siblings	*	older_siblings	Environmental
1	1490.56	0.0150488	1.35949	0.0677	8	1 week	Gestational age		pregn_weeks	Perinatal
1	1304.76	0.013173	1.19003	0.1819	8	1 week	Sex		sex	Perinatal
1	1201.38	0.0121293	1.09574	0.2899	8	1 week	Prenatal smoking		smoke_before_preg	Parental
1	1335.29	0.0134813	1.21661	0.1552	9	1 week	Father's atopy		atopy_father	Parental
1	1584.84	0.0160007	1.44397	0.0445	9	1 week	Mother's atopy	*	atopy_mother	Parental
1	1201.43	0.0121298	1.09465	0.2879	9	1 week	Birth weight		birthweight	Perinatal
1	1967.42	0.0198633	1.79255	0.0065	9	1 week	Breastfeeding	**	breastfeeding_1_2w	Dietary
1	2608.12	0.0263319	2.3763	0.0001	9	1 week	Delivery type	***	delivery_type	Perinatal
1	2090.22	0.0211031	1.90444	0.0033	9	1 week	Formulafeeding	**	formulafeeding_1_2w	Dietary
1	2403.58	0.0242669	2.18995	0.0007	9	1 week	Maternal weight gain	***	mat_weightgain	Parental
1	1814.02	0.0183146	1.65279	0.0105	9	1 week	Older siblings	*	older_siblings	Environmental
1	1486.34	0.0150062	1.35423	0.0699	9	1 week	Gestational age		pregn_weeks	Perinatal
1	1296.86	0.0130933	1.1816	0.1892	9	1 week	Sex		sex	Perinatal
1	1188.78	0.0120021	1.08312	0.3083	9	1 week	Prenatal smoking		smoke_before_preg	Parental
1	1352.7	0.013657	1.23105	0.144	10	1 week	Father's atopy		atopy_father	Parental
1	1633.98	0.0164968	1.48703	0.0341	10	1 week	Mother's atopy	*	atopy_mother	Parental
1	1127.91	0.0113875	1.02647	0.3926	10	1 week	Birth weight		birthweight	Perinatal
1	2043.24	0.0206288	1.85948	0.0046	10	1 week	Breastfeeding	**	breastfeeding_1_2w	Dietary
1	2753.37	0.0277983	2.50575	0.0001	10	1 week	Delivery type	***	delivery_type	Perinatal
1	1987.61	0.0200671	1.80886	0.006	10	1 week	Formulafeeding	**	formulafeeding_1_2w	Dietary
1	2398.85	0.0242191	2.18312	0.0008	10	1 week	Maternal weight gain	***	mat_weightgain	Parental
1	1917.64	0.0193607	1.74518	0.0063	10	1 week	Older siblings	**	older_siblings	Environmental
1	1279.84	0.0129214	1.16474	0.2005	10	1 week	Gestational age		pregn_weeks	Perinatal
1	1305.39	0.0131794	1.18799	0.1832	10	1 week	Sex		sex	Perinatal
1	1402.46	0.0141594	1.27587	0.1148	11	1 week	Father's atopy		atopy_father	Parental
1	1644.3	0.016601	1.49588	0.0328	11	1 week	Mother's atopy	*	atopy_mother	Parental
1	1992.36	0.0201151	1.81252	0.0064	11	1 week	Breastfeeding	**	breastfeeding_1_2w	Dietary
1	3083.06	0.0311269	2.80477	0.0001	11	1 week	Delivery type	***	delivery_type	Perinatal
1	1991.04	0.0201018	1.81133	0.0056	11	1 week	Formulafeeding	**	formulafeeding_1_2w	Dietary
1	2435.87	0.0245929	2.216	0.0007	11	1 week	Maternal weight gain	***	mat_weightgain	Parental
1	1924.9	0.019434	1.75115	0.0067	11	1 week	Older siblings	**	older_siblings	Environmental
1	1318.86	0.0133154	1.19982	0.1711	11	1 week	Gestational age		pregn_weeks	Perinatal
1	1317.05	0.013297	1.19817	0.1713	11	1 week	Sex		sex	Perinatal
1	1323.17	0.0148587	1.27316	0.1081	1	4 weeks	Father's atopy		atopy_father	Parental
1	1595.91	0.0179214	1.53558	0.0238	1	4 weeks	Mother's atopy	*	atopy_mother	Parental
1	742.669	0.00833989	0.714597	0.9259	1	4 weeks	Birth weight		birthweight	Perinatal
1	1360.33	0.015276	1.30891	0.0932	1	4 weeks	Breastfeeding		breastfeeding_4w	Dietary
1	893.299	0.0100314	0.859534	0.711	1	4 weeks	Collected during pandemic		covid_270220	Environmental
1	1072.27	0.0120412	1.03174	0.3899	1	4 weeks	Delivery place		delivery_place	Perinatal
1	1447.6	0.016256	1.39288	0.0582	1	4 weeks	Delivery type		delivery_type	Perinatal
1	1443.36	0.0162084	1.38881	0.0565	1	4 weeks	Formulafeeding		formulafeeding_4w	Dietary
1	1740.89	0.0195496	1.67509	0.0093	1	4 weeks	Pets	**	furrypet_home_yn_6m	Environmental
1	787.678	0.00884533	0.757905	0.8775	1	4 weeks	Hospitalisation		hospital	Perinatal
1	943.208	0.0105919	0.907556	0.6191	1	4 weeks	Intrapartum antibiotics		mat_AB_use_final_delivery	Parental
1	874.765	0.00982328	0.841701	0.736	1	4 weeks	Antepartum antibiotics		mat_AB_use_final_preg	Parental
1	1493.9	0.0167759	1.43743	0.049	1	4 weeks	Maternal weight gain	*	mat_weightgain	Parental
1	1307.83	0.0146865	1.2584	0.121	1	4 weeks	Older siblings		older_siblings	Environmental
1	663.936	0.00745576	0.638841	0.9776	1	4 weeks	Gestational age		pregn_weeks	Perinatal
1	1009.6	0.0113374	0.971438	0.5038	1	4 weeks	Sex		sex	Perinatal
1	981.038	0.0110167	0.943957	0.5469	1	4 weeks	Prenatal smoking		smoke_before_preg	Parental
1	1343.12	0.0150827	1.29235	0.1026	1	4 weeks	Siblings in cohort		twins.siblings_in_lucki	Environmental
4	4428.61	0.0497316	1.0653	0.2777	1	4 weeks	Sequencing batch		bioinfo_batch	Technical variable
1	1342.03	0.0150705	1.29926	0.0926	2	4 weeks	Father's atopy		atopy_father	Parental
1	1616.05	0.0181476	1.56454	0.0206	2	4 weeks	Mother's atopy	*	atopy_mother	Parental
1	954.194	0.0107152	0.923782	0.5886	2	4 weeks	Birth weight		birthweight	Perinatal
1	1362.52	0.0153006	1.31909	0.0869	2	4 weeks	Breastfeeding		breastfeeding_4w	Dietary
1	881.652	0.00990063	0.853553	0.7236	2	4 weeks	Collected during pandemic		covid_270220	Environmental
1	1074.5	0.0120663	1.04026	0.3759	2	4 weeks	Delivery place		delivery_place	Perinatal
1	1671.8	0.0187736	1.61851	0.0159	2	4 weeks	Delivery type	*	delivery_type	Perinatal
1	1473.31	0.0165447	1.42635	0.0441	2	4 weeks	Formulafeeding	*	formulafeeding_4w	Dietary
1	1753.01	0.0196857	1.69714	0.008	2	4 weeks	Pets	**	furrypet_home_yn_6m	Environmental
1	791.025	0.00888292	0.765814	0.8673	2	4 weeks	Hospitalisation		hospital	Perinatal
1	941.565	0.0105734	0.911556	0.6133	2	4 weeks	Intrapartum antibiotics		mat_AB_use_final_delivery	Parental
1	866.838	0.00973426	0.83921	0.7444	2	4 weeks	Antepartum antibiotics		mat_AB_use_final_preg	Parental
1	1551.49	0.0174226	1.50204	0.0342	2	4 weeks	Maternal weight gain	*	mat_weightgain	Parental
1	1316.09	0.0147792	1.27414	0.1111	2	4 weeks	Older siblings		older_siblings	Environmental
1	1043.35	0.0117164	1.01009	0.4298	2	4 weeks	Sex		sex	Perinatal
1	974.603	0.0109444	0.94354	0.5494	2	4 weeks	Prenatal smoking		smoke_before_preg	Parental
1	1344.46	0.0150978	1.30161	0.0976	2	4 weeks	Siblings in cohort		twins.siblings_in_lucki	Environmental
4	4436.2	0.0498168	1.0737	0.2526	2	4 weeks	Sequencing batch		bioinfo_batch	Technical variable
1	1345.93	0.0151143	1.30814	0.0878	3	4 weeks	Father's atopy		atopy_father	Parental
1	1602.91	0.0180001	1.5579	0.0211	3	4 weeks	Mother's atopy	*	atopy_mother	Parental
1	1124.35	0.012626	1.09278	0.3056	3	4 weeks	Birth weight		birthweight	Perinatal
1	1393.5	0.0156485	1.35437	0.07	3	4 weeks	Breastfeeding		breastfeeding_4w	Dietary
1	827.872	0.0092967	0.804627	0.8067	3	4 weeks	Collected during pandemic		covid_270220	Environmental
1	1078.64	0.0121127	1.04835	0.3617	3	4 weeks	Delivery place		delivery_place	Perinatal
1	1815.36	0.0203858	1.76439	0.0064	3	4 weeks	Delivery type	**	delivery_type	Perinatal
1	1447.85	0.0162588	1.40719	0.0509	3	4 weeks	Formulafeeding		formulafeeding_4w	Dietary
1	1726.6	0.0193891	1.67812	0.0088	3	4 weeks	Pets	**	furrypet_home_yn_6m	Environmental
1	937.221	0.0105246	0.910906	0.6147	3	4 weeks	Intrapartum antibiotics		mat_AB_use_final_delivery	Parental
1	828.024	0.0092984	0.804774	0.8035	3	4 weeks	Antepartum antibiotics		mat_AB_use_final_preg	Parental
1	1576.18	0.0176999	1.53192	0.0275	3	4 weeks	Maternal weight gain	*	mat_weightgain	Parental
1	1365.76	0.0153369	1.32741	0.0817	3	4 weeks	Older siblings		older_siblings	Environmental
1	990.709	0.0111253	0.962892	0.5207	3	4 weeks	Sex		sex	Perinatal
1	984.351	0.0110539	0.956712	0.5256	3	4 weeks	Prenatal smoking		smoke_before_preg	Parental
1	1289.88	0.0144849	1.25367	0.1292	3	4 weeks	Siblings in cohort		twins.siblings_in_lucki	Environmental
4	4434.87	0.049802	1.07759	0.2456	3	4 weeks	Sequencing batch		bioinfo_batch	Technical variable
1	1340.54	0.0150538	1.30709	0.0874	4	4 weeks	Father's atopy		atopy_father	Parental
1	1641.73	0.018436	1.60076	0.0165	4	4 weeks	Mother's atopy	*	atopy_mother	Parental
1	1153.59	0.0129544	1.1248	0.2631	4	4 weeks	Birth weight		birthweight	Perinatal
1	1355.21	0.0152185	1.32139	0.0859	4	4 weeks	Breastfeeding		breastfeeding_4w	Dietary
1	1079.27	0.0121198	1.05234	0.3567	4	4 weeks	Delivery place		delivery_place	Perinatal
1	1849.14	0.0207651	1.80299	0.0057	4	4 weeks	Delivery type	**	delivery_type	Perinatal
1	1422.44	0.0159735	1.38695	0.0583	4	4 weeks	Formulafeeding		formulafeeding_4w	Dietary
1	1715.25	0.0192617	1.67245	0.009	4	4 weeks	Pets	**	furrypet_home_yn_6m	Environmental
1	960.696	0.0107883	0.936721	0.5642	4	4 weeks	Intrapartum antibiotics		mat_AB_use_final_delivery	Parental
1	818.131	0.00918731	0.797715	0.815	4	4 weeks	Antepartum antibiotics		mat_AB_use_final_preg	Parental
1	1563.78	0.0175607	1.52476	0.0284	4	4 weeks	Maternal weight gain	*	mat_weightgain	Parental
1	1370.44	0.0153895	1.33624	0.0764	4	4 weeks	Older siblings		older_siblings	Environmental
1	1000.33	0.0112334	0.975369	0.4974	4	4 weeks	Sex		sex	Perinatal
1	964.516	0.0108311	0.940446	0.5542	4	4 weeks	Prenatal smoking		smoke_before_preg	Parental
1	1231.31	0.0138271	1.20058	0.1727	4	4 weeks	Siblings in cohort		twins.siblings_in_lucki	Environmental
4	4499.43	0.0505269	1.09679	0.2045	4	4 weeks	Sequencing batch		bioinfo_batch	Technical variable
1	1353.39	0.015198	1.32393	0.0805	5	4 weeks	Father's atopy		atopy_father	Parental
1	1714.94	0.0192581	1.67761	0.0103	5	4 weeks	Mother's atopy	*	atopy_mother	Parental
1	1169.14	0.013129	1.14369	0.2396	5	4 weeks	Birth weight		birthweight	Perinatal
1	1378.22	0.0154768	1.34822	0.0731	5	4 weeks	Breastfeeding		breastfeeding_4w	Dietary
1	1084.2	0.0121751	1.0606	0.3418	5	4 weeks	Delivery place		delivery_place	Perinatal
1	1884.08	0.0211575	1.84307	0.0046	5	4 weeks	Delivery type	**	delivery_type	Perinatal
1	1407.81	0.0158092	1.37717	0.0626	5	4 weeks	Formulafeeding		formulafeeding_4w	Dietary
1	1803.43	0.0202518	1.76418	0.0049	5	4 weeks	Pets	**	furrypet_home_yn_6m	Environmental
1	959.81	0.0107783	0.938921	0.56	5	4 weeks	Intrapartum antibiotics		mat_AB_use_final_delivery	Parental
1	1664.05	0.0186866	1.62783	0.015	5	4 weeks	Maternal weight gain	*	mat_weightgain	Parental
1	1374.32	0.0154331	1.34441	0.0731	5	4 weeks	Older siblings		older_siblings	Environmental
1	995.222	0.011176	0.973562	0.5005	5	4 weeks	Sex		sex	Perinatal
1	932.549	0.0104722	0.912253	0.6117	5	4 weeks	Prenatal smoking		smoke_before_preg	Parental
1	1270.68	0.0142693	1.24303	0.1409	5	4 weeks	Siblings in cohort		twins.siblings_in_lucki	Environmental
4	4556.78	0.051171	1.1144	0.1703	5	4 weeks	Sequencing batch		bioinfo_batch	Technical variable
1	1389.39	0.0156023	1.36104	0.0658	6	4 weeks	Father's atopy		atopy_father	Parental
1	1800.09	0.0202143	1.76337	0.0057	6	4 weeks	Mother's atopy	**	atopy_mother	Parental
1	1172.86	0.0131708	1.14893	0.2346	6	4 weeks	Birth weight		birthweight	Perinatal
1	1397.51	0.0156935	1.369	0.0671	6	4 weeks	Breastfeeding		breastfeeding_4w	Dietary
1	1067.83	0.0119914	1.04605	0.3643	6	4 weeks	Delivery place		delivery_place	Perinatal
1	1891.94	0.0212457	1.85334	0.0042	6	4 weeks	Delivery type	**	delivery_type	Perinatal
1	1393.41	0.0156475	1.36499	0.0653	6	4 weeks	Formulafeeding		formulafeeding_4w	Dietary
1	1833.32	0.0205875	1.79592	0.0042	6	4 weeks	Pets	**	furrypet_home_yn_6m	Environmental
1	961.363	0.0107957	0.941752	0.5586	6	4 weeks	Intrapartum antibiotics		mat_AB_use_final_delivery	Parental
1	1660.42	0.0186459	1.62655	0.0154	6	4 weeks	Maternal weight gain	*	mat_weightgain	Parental
1	1535.1	0.0172386	1.50378	0.0296	6	4 weeks	Older siblings	*	older_siblings	Environmental
1	994.482	0.0111677	0.974195	0.5014	6	4 weeks	Sex		sex	Perinatal
1	1268.3	0.0142425	1.24243	0.1418	6	4 weeks	Siblings in cohort		twins.siblings_in_lucki	Environmental
4	4539.6	0.050978	1.11175	0.1735	6	4 weeks	Sequencing batch		bioinfo_batch	Technical variable
1	1333.96	0.0149799	1.30794	0.0872	7	4 weeks	Father's atopy		atopy_father	Parental
1	1709	0.0191914	1.67566	0.0101	7	4 weeks	Mother's atopy	*	atopy_mother	Parental
1	1145.93	0.0128684	1.12358	0.2651	7	4 weeks	Birth weight		birthweight	Perinatal
1	1431.66	0.016077	1.40373	0.052	7	4 weeks	Breastfeeding		breastfeeding_4w	Dietary
1	1074.81	0.0120698	1.05385	0.3495	7	4 weeks	Delivery place		delivery_place	Perinatal
1	1832.33	0.0205764	1.79659	0.0048	7	4 weeks	Delivery type	**	delivery_type	Perinatal
1	1290.05	0.0144868	1.26488	0.1211	7	4 weeks	Formulafeeding		formulafeeding_4w	Dietary
1	1793.18	0.0201367	1.7582	0.0052	7	4 weeks	Pets	**	furrypet_home_yn_6m	Environmental
1	1692.16	0.0190023	1.65915	0.0119	7	4 weeks	Maternal weight gain	*	mat_weightgain	Parental
1	1506.57	0.0169182	1.47718	0.0345	7	4 weeks	Older siblings	*	older_siblings	Environmental
1	1005.11	0.011287	0.9855	0.4779	7	4 weeks	Sex		sex	Perinatal
1	1217.08	0.0136674	1.19334	0.1794	7	4 weeks	Siblings in cohort		twins.siblings_in_lucki	Environmental
4	4714.28	0.0529396	1.15558	0.1082	7	4 weeks	Sequencing batch		bioinfo_batch	Technical variable
1	1345.36	0.0151079	1.31941	0.0827	8	4 weeks	Father's atopy		atopy_father	Parental
1	1711	0.0192139	1.678	0.0095	8	4 weeks	Mother's atopy	**	atopy_mother	Parental
1	1210.78	0.0135966	1.18743	0.1924	8	4 weeks	Birth weight		birthweight	Perinatal
1	1431.94	0.0160801	1.40432	0.052	8	4 weeks	Breastfeeding		breastfeeding_4w	Dietary
1	1042.86	0.0117109	1.02274	0.4	8	4 weeks	Delivery place		delivery_place	Perinatal
1	1837.41	0.0206334	1.80197	0.0049	8	4 weeks	Delivery type	**	delivery_type	Perinatal
1	1317.76	0.0147979	1.29234	0.1023	8	4 weeks	Formulafeeding		formulafeeding_4w	Dietary
1	1791.55	0.0201184	1.75699	0.0056	8	4 weeks	Pets	**	furrypet_home_yn_6m	Environmental
1	1693.15	0.0190134	1.66049	0.0119	8	4 weeks	Maternal weight gain	*	mat_weightgain	Parental
1	1512.98	0.0169902	1.48379	0.0329	8	4 weeks	Older siblings	*	older_siblings	Environmental
1	1248.66	0.0140219	1.22457	0.1536	8	4 weeks	Siblings in cohort		twins.siblings_in_lucki	Environmental
4	4615.74	0.051833	1.13168	0.1437	8	4 weeks	Sequencing batch		bioinfo_batch	Technical variable
1	1341.72	0.015067	1.31538	0.0842	9	4 weeks	Father's atopy		atopy_father	Parental
1	1750.08	0.0196527	1.71573	0.008	9	4 weeks	Mother's atopy	**	atopy_mother	Parental
1	1217.45	0.0136715	1.19355	0.1887	9	4 weeks	Birth weight		birthweight	Perinatal
1	1424.36	0.015995	1.39641	0.056	9	4 weeks	Breastfeeding		breastfeeding_4w	Dietary
1	1949.32	0.0218902	1.91107	0.0028	9	4 weeks	Delivery type	**	delivery_type	Perinatal
1	1300.62	0.0146054	1.27509	0.114	9	4 weeks	Formulafeeding		formulafeeding_4w	Dietary
1	1782.14	0.0200127	1.74716	0.0056	9	4 weeks	Pets	**	furrypet_home_yn_6m	Environmental
1	1702.29	0.0191161	1.66888	0.0116	9	4 weeks	Maternal weight gain	*	mat_weightgain	Parental
1	1508.61	0.0169411	1.479	0.0335	9	4 weeks	Older siblings	*	older_siblings	Environmental
1	1240.58	0.0139312	1.21623	0.1603	9	4 weeks	Siblings in cohort		twins.siblings_in_lucki	Environmental
4	4549.03	0.0510839	1.11494	0.1732	9	4 weeks	Sequencing batch		bioinfo_batch	Technical variable
1	1238.41	0.0108053	1.18194	0.1909	1	8 weeks	Father's atopy		atopy_father	Parental
1	2182.67	0.0190441	2.08314	0.0008	1	8 weeks	Mother's atopy	***	atopy_mother	Parental
1	1541.72	0.0134517	1.47142	0.0345	1	8 weeks	Birth weight	*	birthweight	Perinatal
1	1685.09	0.0147027	1.60825	0.0156	1	8 weeks	Breastfeeding	*	breastfeeding_8w	Dietary
1	985.514	0.00859876	0.940575	0.5579	1	8 weeks	Collected during pandemic		covid_270220	Environmental
1	1293	0.0112816	1.23404	0.1367	1	8 weeks	Delivery place		delivery_place	Perinatal
1	1125.33	0.00981863	1.07401	0.3263	1	8 weeks	Delivery type		delivery_type	Perinatal
1	2091.66	0.0182501	1.99628	0.0013	1	8 weeks	Formulafeeding	**	formulafeeding_8w	Dietary
1	1372.74	0.0119774	1.31015	0.0942	1	8 weeks	Pets		furrypet_home_yn_6m	Environmental
1	1050.69	0.00916746	1.00278	0.426	1	8 weeks	Hospitalisation		hospital	Perinatal
1	812.058	0.00708533	0.775028	0.8569	1	8 weeks	Intrapartum antibiotics		mat_AB_use_final_delivery	Parental
1	965.862	0.00842729	0.921819	0.5954	1	8 weeks	Antepartum antibiotics		mat_AB_use_final_preg	Parental
1	1115.54	0.00973324	1.06467	0.3448	1	8 weeks	Maternal weight gain		mat_weightgain	Parental
1	1461.42	0.0127511	1.39478	0.0538	1	8 weeks	Older siblings		older_siblings	Environmental
1	1287.53	0.0112339	1.22882	0.1469	1	8 weeks	Gestational age		pregn_weeks	Perinatal
1	1258.99	0.0109849	1.20158	0.1695	1	8 weeks	Sex		sex	Perinatal
1	1067.59	0.00931486	1.01891	0.4116	1	8 weeks	Prenatal smoking		smoke_before_preg	Parental
1	1204.92	0.0105131	1.14997	0.2172	1	8 weeks	Siblings in cohort		twins.siblings_in_lucki	Environmental
4	4478.66	0.039077	1.06861	0.2732	1	8 weeks	Sequencing batch		bioinfo_batch	Technical variable
1	1217.84	0.0106259	1.16551	0.2098	2	8 weeks	Father's atopy		atopy_father	Parental
1	2105.02	0.0183666	2.01456	0.001	2	8 weeks	Mother's atopy	**	atopy_mother	Parental
1	1523.93	0.0132965	1.45844	0.0378	2	8 weeks	Birth weight	*	birthweight	Perinatal
1	1591.9	0.0138896	1.52349	0.0238	2	8 weeks	Breastfeeding	*	breastfeeding_8w	Dietary
1	992.981	0.00866391	0.950309	0.5387	2	8 weeks	Collected during pandemic		covid_270220	Environmental
1	1270.77	0.0110877	1.21616	0.1511	2	8 weeks	Delivery place		delivery_place	Perinatal
1	1158.15	0.010105	1.10838	0.2766	2	8 weeks	Delivery type		delivery_type	Perinatal
1	2066.49	0.0180304	1.97768	0.0014	2	8 weeks	Formulafeeding	**	formulafeeding_8w	Dietary
1	1325.22	0.0115627	1.26827	0.1163	2	8 weeks	Pets		furrypet_home_yn_6m	Environmental
1	1080.05	0.00942358	1.03363	0.3737	2	8 weeks	Hospitalisation		hospital	Perinatal
1	948.444	0.00827531	0.907685	0.6258	2	8 weeks	Antepartum antibiotics		mat_AB_use_final_preg	Parental
1	1120.46	0.0097762	1.07231	0.3343	2	8 weeks	Maternal weight gain		mat_weightgain	Parental
1	1550.39	0.0135274	1.48377	0.0332	2	8 weeks	Older siblings	*	older_siblings	Environmental
1	1354.39	0.0118173	1.29619	0.1017	2	8 weeks	Gestational age		pregn_weeks	Perinatal
1	1169.3	0.0102023	1.11905	0.2623	2	8 weeks	Sex		sex	Perinatal
1	1093.89	0.00954435	1.04688	0.3659	2	8 weeks	Prenatal smoking		smoke_before_preg	Parental
1	1201.36	0.010482	1.14973	0.2176	2	8 weeks	Siblings in cohort		twins.siblings_in_lucki	Environmental
4	4507.75	0.0393308	1.07851	0.25	2	8 weeks	Sequencing batch		bioinfo_batch	Technical variable
1	1229.13	0.0107243	1.17762	0.1938	3	8 weeks	Father's atopy		atopy_father	Parental
1	2075.6	0.01811	1.98862	0.0013	3	8 weeks	Mother's atopy	**	atopy_mother	Parental
1	1592.81	0.0138975	1.52606	0.0258	3	8 weeks	Birth weight	*	birthweight	Perinatal
1	1542.78	0.013461	1.47813	0.034	3	8 weeks	Breastfeeding	*	breastfeeding_8w	Dietary
1	964.521	0.00841559	0.9241	0.584	3	8 weeks	Collected during pandemic		covid_270220	Environmental
1	1262.02	0.0110113	1.20913	0.1569	3	8 weeks	Delivery place		delivery_place	Perinatal
1	1196.64	0.0104409	1.14649	0.2264	3	8 weeks	Delivery type		delivery_type	Perinatal
1	2026.94	0.0176853	1.94199	0.0014	3	8 weeks	Formulafeeding	**	formulafeeding_8w	Dietary
1	1326.08	0.0115702	1.2705	0.1143	3	8 weeks	Pets		furrypet_home_yn_6m	Environmental
1	1077.34	0.00939995	1.03219	0.3745	3	8 weeks	Hospitalisation		hospital	Perinatal
1	1128.56	0.00984681	1.08126	0.3222	3	8 weeks	Maternal weight gain		mat_weightgain	Parental
1	1555.45	0.0135716	1.49027	0.0316	3	8 weeks	Older siblings	*	older_siblings	Environmental
1	1341.55	0.0117052	1.28532	0.1075	3	8 weeks	Gestational age		pregn_weeks	Perinatal
1	1159.99	0.0101211	1.11138	0.2731	3	8 weeks	Sex		sex	Perinatal
1	1102.72	0.00962143	1.05651	0.3487	3	8 weeks	Prenatal smoking		smoke_before_preg	Parental
1	1285.38	0.0112152	1.23152	0.1403	3	8 weeks	Siblings in cohort		twins.siblings_in_lucki	Environmental
4	4570.39	0.0398774	1.09471	0.2123	3	8 weeks	Sequencing batch		bioinfo_batch	Technical variable
1	1236.99	0.0107929	1.18622	0.186	4	8 weeks	Father's atopy		atopy_father	Parental
1	2075.13	0.0181059	1.98997	0.0013	4	8 weeks	Mother's atopy	**	atopy_mother	Parental
1	1650.6	0.0144017	1.58286	0.0172	4	8 weeks	Birth weight	*	birthweight	Perinatal
1	1579.5	0.0137814	1.51468	0.0263	4	8 weeks	Breastfeeding	*	breastfeeding_8w	Dietary
1	1277.28	0.0111444	1.22486	0.1445	4	8 weeks	Delivery place		delivery_place	Perinatal
1	1200.61	0.0104755	1.15133	0.2193	4	8 weeks	Delivery type		delivery_type	Perinatal
1	2000.41	0.0174539	1.91831	0.0016	4	8 weeks	Formulafeeding	**	formulafeeding_8w	Dietary
1	1325.07	0.0115614	1.27069	0.1159	4	8 weeks	Pets		furrypet_home_yn_6m	Environmental
1	1098.95	0.00958853	1.05385	0.3376	4	8 weeks	Hospitalisation		hospital	Perinatal
1	1127.74	0.00983967	1.08145	0.3219	4	8 weeks	Maternal weight gain		mat_weightgain	Parental
1	1604.68	0.0140011	1.53882	0.0233	4	8 weeks	Older siblings	*	older_siblings	Environmental
1	1420.95	0.012398	1.36263	0.0655	4	8 weeks	Gestational age		pregn_weeks	Perinatal
1	1140.45	0.00995063	1.09365	0.2966	4	8 weeks	Sex		sex	Perinatal
1	1107.9	0.0096666	1.06243	0.338	4	8 weeks	Prenatal smoking		smoke_before_preg	Parental
1	1291.56	0.011269	1.23855	0.1356	4	8 weeks	Siblings in cohort		twins.siblings_in_lucki	Environmental
4	4335.61	0.0378289	1.03942	0.3533	4	8 weeks	Sequencing batch		bioinfo_batch	Technical variable
1	1265.51	0.0110417	1.2114	0.1628	5	8 weeks	Father's atopy		atopy_father	Parental
1	2115.44	0.0184576	2.02499	0.0009	5	8 weeks	Mother's atopy	***	atopy_mother	Parental
1	1475.22	0.0128715	1.41215	0.0513	5	8 weeks	Birth weight		birthweight	Perinatal
1	1751.33	0.0152806	1.67645	0.0104	5	8 weeks	Breastfeeding	*	breastfeeding_8w	Dietary
1	1290.12	0.0112565	1.23496	0.1366	5	8 weeks	Delivery place		delivery_place	Perinatal
1	1291.76	0.0112708	1.23653	0.1454	5	8 weeks	Delivery type		delivery_type	Perinatal
1	2065.39	0.0180209	1.97708	0.0014	5	8 weeks	Formulafeeding	**	formulafeeding_8w	Dietary
1	1296.22	0.0113097	1.2408	0.1373	5	8 weeks	Pets		furrypet_home_yn_6m	Environmental
1	934.767	0.00815598	0.894799	0.645	5	8 weeks	Hospitalisation		hospital	Perinatal
1	1188.15	0.0103667	1.13734	0.2507	5	8 weeks	Maternal weight gain		mat_weightgain	Parental
1	1632.15	0.0142407	1.56236	0.0207	5	8 weeks	Older siblings	*	older_siblings	Environmental
1	1511.04	0.013184	1.44643	0.0388	5	8 weeks	Gestational age	*	pregn_weeks	Perinatal
1	1278.57	0.0111557	1.2239	0.1491	5	8 weeks	Sex		sex	Perinatal
1	1135.85	0.00991044	1.08728	0.2978	5	8 weeks	Prenatal smoking		smoke_before_preg	Parental
1	1260.7	0.0109998	1.2068	0.165	5	8 weeks	Siblings in cohort		twins.siblings_in_lucki	Environmental
1	1277.69	0.011148	1.22451	0.1506	6	8 weeks	Father's atopy		atopy_father	Parental
1	2128.02	0.0185673	2.03944	0.0008	6	8 weeks	Mother's atopy	***	atopy_mother	Parental
1	1389.52	0.0121237	1.33168	0.0818	6	8 weeks	Birth weight		birthweight	Perinatal
1	1765.05	0.0154003	1.69158	0.0102	6	8 weeks	Breastfeeding	*	breastfeeding_8w	Dietary
1	1328.42	0.0115907	1.27313	0.111	6	8 weeks	Delivery place		delivery_place	Perinatal
1	1297.52	0.0113211	1.24351	0.1377	6	8 weeks	Delivery type		delivery_type	Perinatal
1	2070.99	0.0180697	1.98479	0.0016	6	8 weeks	Formulafeeding	**	formulafeeding_8w	Dietary
1	1342.46	0.0117132	1.28658	0.1067	6	8 weeks	Pets		furrypet_home_yn_6m	Environmental
1	1131.89	0.00987588	1.08477	0.3198	6	8 weeks	Maternal weight gain		mat_weightgain	Parental
1	1627.44	0.0141996	1.5597	0.0212	6	8 weeks	Older siblings	*	older_siblings	Environmental
1	1538.63	0.0134248	1.47458	0.0333	6	8 weeks	Gestational age	*	pregn_weeks	Perinatal
1	1252.02	0.0109241	1.19991	0.1684	6	8 weeks	Sex		sex	Perinatal
1	1135.91	0.00991095	1.08862	0.2953	6	8 weeks	Prenatal smoking		smoke_before_preg	Parental
1	1303.25	0.0113711	1.24901	0.1303	6	8 weeks	Siblings in cohort		twins.siblings_in_lucki	Environmental
1	1253.93	0.0109407	1.2006	0.1726	7	8 weeks	Father's atopy		atopy_father	Parental
1	2153.12	0.0187863	2.06156	0.0008	7	8 weeks	Mother's atopy	***	atopy_mother	Parental
1	1355.77	0.0118293	1.29811	0.0992	7	8 weeks	Birth weight		birthweight	Perinatal
1	1714.52	0.0149594	1.64161	0.0114	7	8 weeks	Breastfeeding	*	breastfeeding_8w	Dietary
1	1342.78	0.011716	1.28568	0.1038	7	8 weeks	Delivery place		delivery_place	Perinatal
1	1289.33	0.0112496	1.2345	0.1451	7	8 weeks	Delivery type		delivery_type	Perinatal
1	2077.02	0.0181223	1.98869	0.0017	7	8 weeks	Formulafeeding	**	formulafeeding_8w	Dietary
1	1277.15	0.0111434	1.22284	0.1504	7	8 weeks	Pets		furrypet_home_yn_6m	Environmental
1	1678.9	0.0146486	1.6075	0.0155	7	8 weeks	Older siblings	*	older_siblings	Environmental
1	1613.88	0.0140814	1.54525	0.0226	7	8 weeks	Gestational age	*	pregn_weeks	Perinatal
1	1198.09	0.0104535	1.14714	0.2254	7	8 weeks	Sex		sex	Perinatal
1	1142.97	0.00997258	1.09436	0.2868	7	8 weeks	Prenatal smoking		smoke_before_preg	Parental
1	1310.15	0.0114312	1.25443	0.127	7	8 weeks	Siblings in cohort		twins.siblings_in_lucki	Environmental
1	1251.26	0.0109175	1.19681	0.1766	8	8 weeks	Father's atopy		atopy_father	Parental
1	2203.79	0.0192284	2.10789	0.0003	8	8 weeks	Mother's atopy	***	atopy_mother	Parental
1	1298.28	0.0113277	1.24178	0.1343	8	8 weeks	Birth weight		birthweight	Perinatal
1	1663.81	0.0145169	1.5914	0.0168	8	8 weeks	Breastfeeding	*	breastfeeding_8w	Dietary
1	1307.66	0.0114095	1.25075	0.1261	8	8 weeks	Delivery place		delivery_place	Perinatal
1	1293.41	0.0112852	1.23712	0.1431	8	8 weeks	Delivery type		delivery_type	Perinatal
1	2109.9	0.0184092	2.01808	0.0012	8	8 weeks	Formulafeeding	**	formulafeeding_8w	Dietary
1	1303.01	0.0113689	1.2463	0.1319	8	8 weeks	Pets		furrypet_home_yn_6m	Environmental
1	1655.81	0.0144472	1.58376	0.018	8	8 weeks	Older siblings	*	older_siblings	Environmental
1	1480.89	0.012921	1.41644	0.0487	8	8 weeks	Gestational age	*	pregn_weeks	Perinatal
1	1268.82	0.0110707	1.21361	0.1584	8	8 weeks	Sex		sex	Perinatal
1	1262.7	0.0110172	1.20775	0.1646	8	8 weeks	Siblings in cohort		twins.siblings_in_lucki	Environmental
1	1784.71	0.0160851	1.61783	0.0125	1	4 months	Compelmentary foods age	*	ageintrosolids	Dietary
1	1046.08	0.00942799	0.948265	0.5547	1	4 months	Father's atopy		atopy_father	Parental
1	2095.9	0.0188898	1.89993	0.0014	1	4 months	Mother's atopy	**	atopy_mother	Parental
1	1272.21	0.0114661	1.15326	0.2155	1	4 months	Birth weight		birthweight	Perinatal
1	1347	0.0121401	1.22105	0.1526	1	4 months	Breastfeeding		breastfeeding_4m	Dietary
1	1091.03	0.00983313	0.989014	0.4658	1	4 months	Collected during pandemic		covid_270220	Environmental
1	1617.89	0.0145816	1.46662	0.0358	1	4 months	Daycare	*	daycare_6m	Environmental
1	1055.15	0.00950975	0.956489	0.5335	1	4 months	Delivery place		delivery_place	Perinatal
1	1295.37	0.0116748	1.17425	0.1922	1	4 months	Delivery type		delivery_type	Perinatal
1	1155.25	0.0104119	1.04723	0.3632	1	4 months	Formulafeeding		formulafeeding_4m	Dietary
1	895.085	0.00806715	0.811392	0.8062	1	4 months	Pets		furrypet_home_yn_6m	Environmental
1	1071.47	0.0096569	0.971289	0.5082	1	4 months	Hospitalisation		hospital	Perinatal
1	1264.15	0.0113934	1.14595	0.229	1	4 months	Intrapartum antibiotics		mat_AB_use_final_delivery	Parental
1	925.226	0.0083388	0.838715	0.7585	1	4 months	Antepartum antibiotics		mat_AB_use_final_preg	Parental
1	1285.18	0.0115829	1.16501	0.2015	1	4 months	Maternal weight gain		mat_weightgain	Parental
1	1397.48	0.0125951	1.26681	0.114	1	4 months	Older siblings		older_siblings	Environmental
1	1502.3	0.0135398	1.36183	0.0708	1	4 months	Gestational age		pregn_weeks	Perinatal
1	998.883	0.00900265	0.905485	0.64	1	4 months	Sex		sex	Perinatal
1	1440.65	0.0129841	1.30594	0.0882	1	4 months	Prenatal smoking		smoke_before_preg	Parental
1	1279.5	0.0115318	1.15987	0.2071	1	4 months	Siblings in cohort		twins.siblings_in_lucki	Environmental
4	5241.25	0.0472379	1.18779	0.0773	1	4 months	Sequencing batch		bioinfo_batch	Technical variable
1	1783.99	0.0158462	1.61671	0.0122	2	4 months	Compelmentary foods age	*	ageintrosolids	Dietary
1	1042.47	0.00925973	0.944724	0.5494	2	4 months	Father's atopy		atopy_father	Parental
1	2178.09	0.0193469	1.97387	0.0015	2	4 months	Mother's atopy	**	atopy_mother	Parental
1	1308.18	0.0116199	1.18552	0.1785	2	4 months	Birth weight		birthweight	Perinatal
1	1472.15	0.0130764	1.33412	0.0803	2	4 months	Breastfeeding		breastfeeding_4m	Dietary
1	1024.17	0.00909718	0.928141	0.5805	2	4 months	Collected during pandemic		covid_270220	Environmental
1	1574.01	0.0139811	1.42642	0.0426	2	4 months	Daycare	*	daycare_6m	Environmental
1	1074.26	0.0095421	0.973533	0.4967	2	4 months	Delivery place		delivery_place	Perinatal
1	1311.99	0.0116537	1.18897	0.179	2	4 months	Delivery type		delivery_type	Perinatal
1	1189.48	0.0105655	1.07795	0.319	2	4 months	Formulafeeding		formulafeeding_4m	Dietary
1	1057.76	0.00939555	0.958582	0.53	2	4 months	Hospitalisation		hospital	Perinatal
1	1342.35	0.0119234	1.21648	0.1542	2	4 months	Intrapartum antibiotics		mat_AB_use_final_delivery	Parental
1	933.253	0.00828961	0.845748	0.7464	2	4 months	Antepartum antibiotics		mat_AB_use_final_preg	Parental
1	1370.54	0.0121738	1.24203	0.1312	2	4 months	Maternal weight gain		mat_weightgain	Parental
1	1368.05	0.0121517	1.23977	0.1311	2	4 months	Older siblings		older_siblings	Environmental
1	1568.73	0.0139343	1.42164	0.0424	2	4 months	Gestational age	*	pregn_weeks	Perinatal
1	1066.06	0.00946927	0.966103	0.5134	2	4 months	Sex		sex	Perinatal
1	1475.36	0.0131049	1.33703	0.0715	2	4 months	Prenatal smoking		smoke_before_preg	Parental
1	1257.17	0.0111668	1.1393	0.2356	2	4 months	Siblings in cohort		twins.siblings_in_lucki	Environmental
4	5294.61	0.0470293	1.19954	0.0683	2	4 months	Sequencing batch		bioinfo_batch	Technical variable
1	1781.13	0.0158209	1.61754	0.0118	3	4 months	Compelmentary foods age	*	ageintrosolids	Dietary
1	1088.57	0.0096692	0.988589	0.461	3	4 months	Father's atopy		atopy_father	Parental
1	2157.84	0.019167	1.95965	0.0015	3	4 months	Mother's atopy	**	atopy_mother	Parental
1	1312.73	0.0116603	1.19216	0.173	3	4 months	Birth weight		birthweight	Perinatal
1	1489.17	0.0132275	1.3524	0.0726	3	4 months	Breastfeeding		breastfeeding_4m	Dietary
1	1057.52	0.00939344	0.960395	0.5186	3	4 months	Collected during pandemic		covid_270220	Environmental
1	1579.38	0.0140289	1.43433	0.0402	3	4 months	Daycare	*	daycare_6m	Environmental
1	1040.64	0.00924346	0.945062	0.5506	3	4 months	Delivery place		delivery_place	Perinatal
1	1337.9	0.0118839	1.21502	0.1535	3	4 months	Delivery type		delivery_type	Perinatal
1	1200.08	0.0106597	1.08986	0.2997	3	4 months	Formulafeeding		formulafeeding_4m	Dietary
1	1023.44	0.00909071	0.929444	0.5872	3	4 months	Hospitalisation		hospital	Perinatal
1	1331.38	0.011826	1.2091	0.1619	3	4 months	Intrapartum antibiotics		mat_AB_use_final_delivery	Parental
1	1400.35	0.0124386	1.27174	0.1085	3	4 months	Maternal weight gain		mat_weightgain	Parental
1	1340.08	0.0119032	1.217	0.1512	3	4 months	Older siblings		older_siblings	Environmental
1	1562.24	0.0138766	1.41876	0.0453	3	4 months	Gestational age	*	pregn_weeks	Perinatal
1	1062.73	0.0094397	0.965125	0.5151	3	4 months	Sex		sex	Perinatal
1	1500.38	0.0133271	1.36257	0.0632	3	4 months	Prenatal smoking		smoke_before_preg	Parental
1	1200.9	0.010667	1.09061	0.3003	3	4 months	Siblings in cohort		twins.siblings_in_lucki	Environmental
4	5319.98	0.0472547	1.20784	0.0607	3	4 months	Sequencing batch		bioinfo_batch	Technical variable
1	1719.83	0.0152764	1.56337	0.0171	4	4 months	Compelmentary foods age	*	ageintrosolids	Dietary
1	1082.31	0.00961362	0.983845	0.473	4	4 months	Father's atopy		atopy_father	Parental
1	2162.81	0.0192111	1.96604	0.0018	4	4 months	Mother's atopy	**	atopy_mother	Parental
1	1311.86	0.0116526	1.19251	0.1743	4	4 months	Birth weight		birthweight	Perinatal
1	1473.62	0.0130894	1.33955	0.0775	4	4 months	Breastfeeding		breastfeeding_4m	Dietary
1	1040.47	0.00924198	0.945812	0.5483	4	4 months	Collected during pandemic		covid_270220	Environmental
1	1547.19	0.0137429	1.40643	0.0473	4	4 months	Daycare	*	daycare_6m	Environmental
1	981.993	0.00872255	0.892654	0.6534	4	4 months	Delivery place		delivery_place	Perinatal
1	1345.98	0.0119557	1.22353	0.1461	4	4 months	Delivery type		delivery_type	Perinatal
1	1197.27	0.0106347	1.08834	0.3006	4	4 months	Formulafeeding		formulafeeding_4m	Dietary
1	1323.15	0.0117529	1.20277	0.1665	4	4 months	Intrapartum antibiotics		mat_AB_use_final_delivery	Parental
1	1408.54	0.0125113	1.28039	0.1049	4	4 months	Maternal weight gain		mat_weightgain	Parental
1	1441.63	0.0128053	1.31048	0.0877	4	4 months	Older siblings		older_siblings	Environmental
1	1592.08	0.0141416	1.44723	0.0368	4	4 months	Gestational age	*	pregn_weeks	Perinatal
1	1051.7	0.00934175	0.956022	0.5354	4	4 months	Sex		sex	Perinatal
1	1518.04	0.013484	1.37993	0.0576	4	4 months	Prenatal smoking		smoke_before_preg	Parental
1	1287.25	0.011434	1.17014	0.1949	4	4 months	Siblings in cohort		twins.siblings_in_lucki	Environmental
4	5327.13	0.0473182	1.21062	0.0601	4	4 months	Sequencing batch		bioinfo_batch	Technical variable
1	1704.74	0.0151423	1.55187	0.0188	5	4 months	Compelmentary foods age	*	ageintrosolids	Dietary
1	1125.61	0.0099982	1.02467	0.3975	5	4 months	Father's atopy		atopy_father	Parental
1	2160.82	0.0191935	1.96705	0.0018	5	4 months	Mother's atopy	**	atopy_mother	Parental
1	1309.24	0.0116293	1.19183	0.1722	5	4 months	Birth weight		birthweight	Perinatal
1	1449.42	0.0128745	1.31945	0.0864	5	4 months	Breastfeeding		breastfeeding_4m	Dietary
1	1035.92	0.00920157	0.943026	0.5556	5	4 months	Collected during pandemic		covid_270220	Environmental
1	1521.62	0.0135158	1.38517	0.0537	5	4 months	Daycare		daycare_6m	Environmental
1	1347.45	0.0119687	1.22661	0.1426	5	4 months	Delivery type		delivery_type	Perinatal
1	1196.93	0.0106317	1.0896	0.2991	5	4 months	Formulafeeding		formulafeeding_4m	Dietary
1	1304.79	0.0115898	1.18778	0.1822	5	4 months	Intrapartum antibiotics		mat_AB_use_final_delivery	Parental
1	1413.36	0.0125542	1.28662	0.1017	5	4 months	Maternal weight gain		mat_weightgain	Parental
1	1492.39	0.0132561	1.35856	0.0643	5	4 months	Older siblings		older_siblings	Environmental
1	1576.55	0.0140037	1.43517	0.0384	5	4 months	Gestational age	*	pregn_weeks	Perinatal
1	1081.6	0.00960734	0.984612	0.4825	5	4 months	Sex		sex	Perinatal
1	1515.08	0.0134577	1.37922	0.0568	5	4 months	Prenatal smoking		smoke_before_preg	Parental
1	1280.62	0.0113751	1.16578	0.2007	5	4 months	Siblings in cohort		twins.siblings_in_lucki	Environmental
4	5207.87	0.0462588	1.18521	0.0792	5	4 months	Sequencing batch		bioinfo_batch	Technical variable
1	1713.04	0.0152161	1.56059	0.018	6	4 months	Compelmentary foods age	*	ageintrosolids	Dietary
1	1121.83	0.0099646	1.02199	0.4026	6	4 months	Father's atopy		atopy_father	Parental
1	2173.27	0.019304	1.97987	0.0015	6	4 months	Mother's atopy	**	atopy_mother	Parental
1	1309.79	0.0116342	1.19323	0.1713	6	4 months	Birth weight		birthweight	Perinatal
1	1507.84	0.0133934	1.37365	0.0608	6	4 months	Breastfeeding		breastfeeding_4m	Dietary
1	1586.7	0.0140939	1.4455	0.0368	6	4 months	Daycare	*	daycare_6m	Environmental
1	1372.68	0.0121928	1.25052	0.1246	6	4 months	Delivery type		delivery_type	Perinatal
1	1212.32	0.0107684	1.10443	0.2774	6	4 months	Formulafeeding		formulafeeding_4m	Dietary
1	1320.1	0.0117258	1.20263	0.1688	6	4 months	Intrapartum antibiotics		mat_AB_use_final_delivery	Parental
1	1447.9	0.0128609	1.31905	0.0817	6	4 months	Maternal weight gain		mat_weightgain	Parental
1	1494.54	0.0132752	1.36153	0.0638	6	4 months	Older siblings		older_siblings	Environmental
1	1578.07	0.0140172	1.43763	0.0372	6	4 months	Gestational age	*	pregn_weeks	Perinatal
1	1063.05	0.00944255	0.968449	0.5102	6	4 months	Sex		sex	Perinatal
1	1542.38	0.0137002	1.40512	0.0504	6	4 months	Prenatal smoking		smoke_before_preg	Parental
1	1270.54	0.0112855	1.15747	0.2101	6	4 months	Siblings in cohort		twins.siblings_in_lucki	Environmental
4	5227.55	0.0464336	1.19058	0.0755	6	4 months	Sequencing batch		bioinfo_batch	Technical variable
1	1737	0.0154289	1.58307	0.0149	7	4 months	Compelmentary foods age	*	ageintrosolids	Dietary
1	1099.66	0.00976775	1.00221	0.4414	7	4 months	Father's atopy		atopy_father	Parental
1	2173.88	0.0193095	1.98123	0.0014	7	4 months	Mother's atopy	**	atopy_mother	Parental
1	1385.77	0.0123091	1.26297	0.1188	7	4 months	Birth weight		birthweight	Perinatal
1	1521.05	0.0135107	1.38626	0.0565	7	4 months	Breastfeeding		breastfeeding_4m	Dietary
1	1570.86	0.0139532	1.43166	0.04	7	4 months	Daycare	*	daycare_6m	Environmental
1	1372.64	0.0121925	1.251	0.1252	7	4 months	Delivery type		delivery_type	Perinatal
1	1191.27	0.0105814	1.0857	0.3034	7	4 months	Formulafeeding		formulafeeding_4m	Dietary
1	1371.28	0.0121804	1.24976	0.1298	7	4 months	Intrapartum antibiotics		mat_AB_use_final_delivery	Parental
1	1437.55	0.012769	1.31016	0.0888	7	4 months	Maternal weight gain		mat_weightgain	Parental
1	1482.98	0.0131726	1.35156	0.0684	7	4 months	Older siblings		older_siblings	Environmental
1	1647	0.0146295	1.50105	0.0257	7	4 months	Gestational age	*	pregn_weeks	Perinatal
1	1541.34	0.0136909	1.40475	0.0502	7	4 months	Prenatal smoking		smoke_before_preg	Parental
1	1277.4	0.0113465	1.1642	0.2007	7	4 months	Siblings in cohort		twins.siblings_in_lucki	Environmental
4	5263.53	0.0467533	1.19927	0.0674	7	4 months	Sequencing batch		bioinfo_batch	Technical variable
1	1709.27	0.0151826	1.55775	0.018	8	4 months	Compelmentary foods age	*	ageintrosolids	Dietary
1	2167.36	0.0192516	1.97524	0.0012	8	4 months	Mother's atopy	**	atopy_mother	Parental
1	1391	0.0123555	1.26769	0.1141	8	4 months	Birth weight		birthweight	Perinatal
1	1529.55	0.0135862	1.39396	0.0532	8	4 months	Breastfeeding		breastfeeding_4m	Dietary
1	1573.26	0.0139745	1.4338	0.0393	8	4 months	Daycare	*	daycare_6m	Environmental
1	1370.46	0.0121731	1.24898	0.1254	8	4 months	Delivery type		delivery_type	Perinatal
1	1200.22	0.010661	1.09383	0.2927	8	4 months	Formulafeeding		formulafeeding_4m	Dietary
1	1355.92	0.012044	1.23573	0.1392	8	4 months	Intrapartum antibiotics		mat_AB_use_final_delivery	Parental
1	1436.47	0.0127595	1.30914	0.0895	8	4 months	Maternal weight gain		mat_weightgain	Parental
1	1660.36	0.0147481	1.51318	0.024	8	4 months	Older siblings	*	older_siblings	Environmental
1	1650.28	0.0146586	1.504	0.0247	8	4 months	Gestational age	*	pregn_weeks	Perinatal
1	1532.12	0.0136091	1.39631	0.0536	8	4 months	Prenatal smoking		smoke_before_preg	Parental
1	1320.02	0.0117251	1.20301	0.1645	8	4 months	Siblings in cohort		twins.siblings_in_lucki	Environmental
4	5304.41	0.0471163	1.20855	0.0607	8	4 months	Sequencing batch		bioinfo_batch	Technical variable
1	2222.82	0.0197441	2.02337	0.0005	9	4 months	Compelmentary foods age	***	ageintrosolids	Dietary
1	2141.97	0.019026	1.94978	0.0018	9	4 months	Mother's atopy	**	atopy_mother	Parental
1	1392.73	0.0123709	1.26777	0.1149	9	4 months	Birth weight		birthweight	Perinatal
1	2346.64	0.020844	2.13609	0.0005	9	4 months	Breastfeeding	***	breastfeeding_4m	Dietary
1	1613.29	0.01433	1.46853	0.033	9	4 months	Daycare	*	daycare_6m	Environmental
1	1374	0.0122045	1.25072	0.1264	9	4 months	Delivery type		delivery_type	Perinatal
1	1304.8	0.0115898	1.18772	0.18	9	4 months	Intrapartum antibiotics		mat_AB_use_final_delivery	Parental
1	1492.89	0.0132606	1.35894	0.0646	9	4 months	Maternal weight gain		mat_weightgain	Parental
1	1662.6	0.014768	1.51342	0.0241	9	4 months	Older siblings	*	older_siblings	Environmental
1	1636.84	0.0145392	1.48997	0.027	9	4 months	Gestational age	*	pregn_weeks	Perinatal
1	1543.15	0.0137071	1.40469	0.0509	9	4 months	Prenatal smoking		smoke_before_preg	Parental
1	1390.9	0.0123547	1.26611	0.1161	9	4 months	Siblings in cohort		twins.siblings_in_lucki	Environmental
4	5171.62	0.0459369	1.1769	0.0875	9	4 months	Sequencing batch		bioinfo_batch	Technical variable
1	1764.2	0.0145516	1.29003	0.0926	1	5 months	Compelmentary foods age		ageintrosolids	Dietary
1	1407.87	0.0116125	1.02947	0.387	1	5 months	Father's atopy		atopy_father	Parental
1	2089.12	0.0172316	1.52762	0.0185	1	5 months	Mother's atopy	*	atopy_mother	Parental
1	1329.84	0.0109688	0.972414	0.4979	1	5 months	Birth weight		birthweight	Perinatal
1	1567.21	0.0129267	1.14598	0.2067	1	5 months	Breastfeeding		breastfeeding_5m	Dietary
1	1042.1	0.00859547	0.762009	0.8933	1	5 months	Collected during pandemic		covid_270220	Environmental
1	1957.27	0.016144	1.43121	0.036	1	5 months	Daycare	*	daycare_6m	Environmental
1	921.89	0.00760397	0.67411	0.9671	1	5 months	Delivery place		delivery_place	Perinatal
1	1883.34	0.0155343	1.37715	0.0511	1	5 months	Delivery type		delivery_type	Perinatal
1	1054.14	0.00869477	0.770812	0.8793	1	5 months	Formulafeeding		formulafeeding_5m	Dietary
1	1023.65	0.00844334	0.748522	0.9136	1	5 months	Pets		furrypet_home_yn_6m	Environmental
1	1186.43	0.00978593	0.867546	0.7255	1	5 months	Hospitalisation		hospital	Perinatal
1	1038.81	0.00856834	0.759604	0.8897	1	5 months	Intrapartum antibiotics		mat_AB_use_final_delivery	Parental
1	766.697	0.00632391	0.560629	0.9972	1	5 months	Antepartum antibiotics		mat_AB_use_final_preg	Parental
1	1195.55	0.00986118	0.874217	0.6761	1	5 months	Maternal weight gain		mat_weightgain	Parental
1	1329.81	0.0109686	0.972392	0.5111	1	5 months	Older siblings		older_siblings	Environmental
1	1124.17	0.0092724	0.82202	0.8049	1	5 months	Gestational age		pregn_weeks	Perinatal
1	1107.13	0.00913187	0.809562	0.8251	1	5 months	Sex		sex	Perinatal
1	1217.32	0.0100408	0.890139	0.6738	1	5 months	Prenatal smoking		smoke_before_preg	Parental
1	1232.06	0.0101624	0.900917	0.6502	1	5 months	Siblings in cohort		twins.siblings_in_lucki	Environmental
4	4779.97	0.0394264	0.87381	0.8811	1	5 months	Sequencing batch		bioinfo_batch	Technical variable
1	1769.97	0.0145992	1.30334	0.0853	2	5 months	Compelmentary foods age		ageintrosolids	Dietary
1	1451.88	0.0119755	1.06911	0.3199	2	5 months	Father's atopy		atopy_father	Parental
1	2087.9	0.0172215	1.53745	0.0186	2	5 months	Mother's atopy	*	atopy_mother	Parental
1	1320.97	0.0108957	0.972714	0.4973	2	5 months	Birth weight		birthweight	Perinatal
1	1571.31	0.0129605	1.15705	0.1943	2	5 months	Breastfeeding		breastfeeding_5m	Dietary
1	1123.91	0.00927027	0.827603	0.793	2	5 months	Collected during pandemic		covid_270220	Environmental
1	1954.75	0.0161233	1.43941	0.0332	2	5 months	Daycare	*	daycare_6m	Environmental
1	961.409	0.00792994	0.707946	0.9433	2	5 months	Delivery place		delivery_place	Perinatal
1	1864.61	0.0153798	1.37303	0.0541	2	5 months	Delivery type		delivery_type	Perinatal
1	1001.97	0.00826454	0.737816	0.9194	2	5 months	Formulafeeding		formulafeeding_5m	Dietary
1	1029.88	0.00849471	0.758366	0.9038	2	5 months	Pets		furrypet_home_yn_6m	Environmental
1	1175.39	0.00969491	0.865513	0.7323	2	5 months	Hospitalisation		hospital	Perinatal
1	1065.32	0.00878705	0.784464	0.8586	2	5 months	Intrapartum antibiotics		mat_AB_use_final_delivery	Parental
1	1202.6	0.00991936	0.88555	0.6543	2	5 months	Maternal weight gain		mat_weightgain	Parental
1	1274.8	0.0105149	0.938718	0.5771	2	5 months	Older siblings		older_siblings	Environmental
1	1136.61	0.00937507	0.836959	0.7787	2	5 months	Gestational age		pregn_weeks	Perinatal
1	1079.74	0.00890593	0.795077	0.8511	2	5 months	Sex		sex	Perinatal
1	1212.58	0.0100016	0.892895	0.6684	2	5 months	Prenatal smoking		smoke_before_preg	Parental
1	1237.25	0.0102052	0.911066	0.6278	2	5 months	Siblings in cohort		twins.siblings_in_lucki	Environmental
4	4753.19	0.0392055	0.875017	0.8793	2	5 months	Sequencing batch		bioinfo_batch	Technical variable
1	1775.29	0.0146431	1.31325	0.0811	3	5 months	Compelmentary foods age		ageintrosolids	Dietary
1	1460.23	0.0120443	1.08019	0.2991	3	5 months	Father's atopy		atopy_father	Parental
1	2138.04	0.0176351	1.58159	0.0134	3	5 months	Mother's atopy	*	atopy_mother	Parental
1	1202.6	0.00991938	0.889612	0.6725	3	5 months	Birth weight		birthweight	Perinatal
1	1546.31	0.0127543	1.14386	0.2089	3	5 months	Breastfeeding		breastfeeding_5m	Dietary
1	1129.58	0.00931706	0.835594	0.7758	3	5 months	Collected during pandemic		covid_270220	Environmental
1	1962.55	0.0161876	1.45178	0.0306	3	5 months	Daycare	*	daycare_6m	Environmental
1	1864.54	0.0153792	1.37927	0.0517	3	5 months	Delivery type		delivery_type	Perinatal
1	1072.39	0.00884537	0.79329	0.8498	3	5 months	Formulafeeding		formulafeeding_5m	Dietary
1	1010.37	0.00833382	0.747412	0.9136	3	5 months	Pets		furrypet_home_yn_6m	Environmental
1	1175.81	0.00969838	0.869792	0.723	3	5 months	Hospitalisation		hospital	Perinatal
1	1075.72	0.00887282	0.795752	0.8435	3	5 months	Intrapartum antibiotics		mat_AB_use_final_delivery	Parental
1	1203.31	0.00992517	0.890132	0.6444	3	5 months	Maternal weight gain		mat_weightgain	Parental
1	1281.21	0.0105678	0.947761	0.5557	3	5 months	Older siblings		older_siblings	Environmental
1	1108.63	0.00914423	0.820093	0.8071	3	5 months	Gestational age		pregn_weeks	Perinatal
1	1078.87	0.00889882	0.798084	0.8467	3	5 months	Sex		sex	Perinatal
1	1217.44	0.0100417	0.900586	0.6552	3	5 months	Prenatal smoking		smoke_before_preg	Parental
1	1230.08	0.010146	0.909935	0.6313	3	5 months	Siblings in cohort		twins.siblings_in_lucki	Environmental
4	4806.81	0.0396478	0.888945	0.8484	3	5 months	Sequencing batch		bioinfo_batch	Technical variable
1	1751.4	0.0142348	1.29905	0.0873	4	5 months	Compelmentary foods age		ageintrosolids	Dietary
1	1475.84	0.0119952	1.09466	0.273	4	5 months	Father's atopy		atopy_father	Parental
1	2188.28	0.0177856	1.62309	0.01	4	5 months	Mother's atopy	**	atopy_mother	Parental
1	1188.81	0.00966224	0.881763	0.6935	4	5 months	Birth weight		birthweight	Perinatal
1	1660.46	0.0134957	1.2316	0.1343	4	5 months	Breastfeeding		breastfeeding_5m	Dietary
1	1070.78	0.00870294	0.794218	0.8472	4	5 months	Collected during pandemic		covid_270220	Environmental
1	1914.84	0.0155632	1.42028	0.0386	4	5 months	Daycare	*	daycare_6m	Environmental
1	1882.23	0.0152982	1.39609	0.0488	4	5 months	Delivery type	*	delivery_type	Perinatal
1	1100.92	0.00894791	0.816574	0.8101	4	5 months	Formulafeeding		formulafeeding_5m	Dietary
1	1195.24	0.00971455	0.886537	0.6857	4	5 months	Hospitalisation		hospital	Perinatal
1	997.007	0.00810336	0.739502	0.9152	4	5 months	Intrapartum antibiotics		mat_AB_use_final_delivery	Parental
1	1324.71	0.0107668	0.982568	0.4745	4	5 months	Maternal weight gain		mat_weightgain	Parental
1	1365.18	0.0110958	1.01258	0.4256	4	5 months	Older siblings		older_siblings	Environmental
1	1122.81	0.00912589	0.832816	0.7873	4	5 months	Gestational age		pregn_weeks	Perinatal
1	1032.75	0.00839389	0.766015	0.8958	4	5 months	Sex		sex	Perinatal
1	1211.85	0.00984957	0.898859	0.658	4	5 months	Prenatal smoking		smoke_before_preg	Parental
1	1237.43	0.0100575	0.917831	0.6123	4	5 months	Siblings in cohort		twins.siblings_in_lucki	Environmental
4	4846.75	0.0393929	0.898735	0.8225	4	5 months	Sequencing batch		bioinfo_batch	Technical variable
1	1773.44	0.014414	1.32053	0.0794	5	5 months	Compelmentary foods age		ageintrosolids	Dietary
1	1453.23	0.0118114	1.0821	0.2954	5	5 months	Father's atopy		atopy_father	Parental
1	2190.41	0.017803	1.63102	0.0092	5	5 months	Mother's atopy	**	atopy_mother	Parental
1	1214.81	0.00987358	0.904566	0.6471	5	5 months	Birth weight		birthweight	Perinatal
1	1662.38	0.0135113	1.23784	0.1296	5	5 months	Breastfeeding		breastfeeding_5m	Dietary
1	1075.69	0.0087429	0.80098	0.8361	5	5 months	Collected during pandemic		covid_270220	Environmental
1	1857.71	0.0150989	1.38328	0.0492	5	5 months	Daycare	*	daycare_6m	Environmental
1	1873.93	0.0152308	1.39536	0.0479	5	5 months	Delivery type	*	delivery_type	Perinatal
1	1092.47	0.00887927	0.813473	0.8158	5	5 months	Formulafeeding		formulafeeding_5m	Dietary
1	1283.58	0.0104325	0.955775	0.5362	5	5 months	Hospitalisation		hospital	Perinatal
1	1327.15	0.0107866	0.988217	0.4641	5	5 months	Maternal weight gain		mat_weightgain	Parental
1	1365.36	0.0110972	1.01667	0.4173	5	5 months	Older siblings		older_siblings	Environmental
1	1120.52	0.00910723	0.834358	0.7832	5	5 months	Gestational age		pregn_weeks	Perinatal
1	1015.71	0.0082554	0.756317	0.9066	5	5 months	Sex		sex	Perinatal
1	1232.57	0.0100179	0.91779	0.6159	5	5 months	Prenatal smoking		smoke_before_preg	Parental
1	1239.51	0.0100743	0.922959	0.6014	5	5 months	Siblings in cohort		twins.siblings_in_lucki	Environmental
4	4982.51	0.0404963	0.927515	0.7358	5	5 months	Sequencing batch		bioinfo_batch	Technical variable
1	1781.89	0.0144826	1.3316	0.0742	6	5 months	Compelmentary foods age		ageintrosolids	Dietary
1	1442.85	0.011727	1.07823	0.2998	6	5 months	Father's atopy		atopy_father	Parental
1	2204.34	0.0179162	1.64729	0.0077	6	5 months	Mother's atopy	**	atopy_mother	Parental
1	1320.68	0.0107341	0.986937	0.4758	6	5 months	Birth weight		birthweight	Perinatal
1	1659.89	0.0134911	1.24043	0.1242	6	5 months	Breastfeeding		breastfeeding_5m	Dietary
1	1089.94	0.0088587	0.814507	0.8112	6	5 months	Collected during pandemic		covid_270220	Environmental
1	1923.6	0.0156344	1.43749	0.0339	6	5 months	Daycare	*	daycare_6m	Environmental
1	1878.26	0.0152659	1.40361	0.0453	6	5 months	Delivery type	*	delivery_type	Perinatal
1	1094.4	0.00889495	0.81784	0.8094	6	5 months	Formulafeeding		formulafeeding_5m	Dietary
1	1292.82	0.0105076	0.966118	0.516	6	5 months	Hospitalisation		hospital	Perinatal
1	1309.66	0.0106445	0.978702	0.4802	6	5 months	Maternal weight gain		mat_weightgain	Parental
1	1378.52	0.0112042	1.03016	0.3909	6	5 months	Older siblings		older_siblings	Environmental
1	1134.64	0.00922201	0.847911	0.756	6	5 months	Gestational age		pregn_weeks	Perinatal
1	1228.82	0.00998743	0.918287	0.6166	6	5 months	Prenatal smoking		smoke_before_preg	Parental
1	1275.24	0.0103647	0.952979	0.5437	6	5 months	Siblings in cohort		twins.siblings_in_lucki	Environmental
4	5058.54	0.0411142	0.945054	0.6775	6	5 months	Sequencing batch		bioinfo_batch	Technical variable
1	1789.05	0.0145409	1.34055	0.07	7	5 months	Compelmentary foods age		ageintrosolids	Dietary
1	1459.65	0.0118636	1.09373	0.2743	7	5 months	Father's atopy		atopy_father	Parental
1	2206.98	0.0179377	1.65371	0.0076	7	5 months	Mother's atopy	**	atopy_mother	Parental
1	1303.68	0.0105959	0.976861	0.4939	7	5 months	Birth weight		birthweight	Perinatal
1	1672.53	0.0135938	1.25324	0.1149	7	5 months	Breastfeeding		breastfeeding_5m	Dietary
1	1914.94	0.015564	1.43488	0.035	7	5 months	Daycare	*	daycare_6m	Environmental
1	1885.44	0.0153242	1.41277	0.0441	7	5 months	Delivery type	*	delivery_type	Perinatal
1	1117.25	0.00908065	0.837165	0.7784	7	5 months	Formulafeeding		formulafeeding_5m	Dietary
1	1308.65	0.0106363	0.980583	0.4882	7	5 months	Hospitalisation		hospital	Perinatal
1	1362.1	0.0110707	1.02063	0.4053	7	5 months	Maternal weight gain		mat_weightgain	Parental
1	1531.27	0.0124456	1.14739	0.2144	7	5 months	Older siblings		older_siblings	Environmental
1	1137.92	0.00924868	0.852655	0.7493	7	5 months	Gestational age		pregn_weeks	Perinatal
1	1229.84	0.00999574	0.921529	0.6102	7	5 months	Prenatal smoking		smoke_before_preg	Parental
1	1263.17	0.0102667	0.946508	0.5566	7	5 months	Siblings in cohort		twins.siblings_in_lucki	Environmental
4	5540.4	0.0450306	1.03787	0.3444	7	5 months	Sequencing batch		bioinfo_batch	Technical variable
1	1764.92	0.0143447	1.32555	0.0784	8	5 months	Compelmentary foods age		ageintrosolids	Dietary
1	1433.71	0.0116528	1.0768	0.3026	8	5 months	Father's atopy		atopy_father	Parental
1	2179.12	0.0177112	1.63664	0.0084	8	5 months	Mother's atopy	**	atopy_mother	Parental
1	1299.83	0.0105646	0.976245	0.4955	8	5 months	Birth weight		birthweight	Perinatal
1	2823.13	0.0229455	2.12033	0.0004	8	5 months	Breastfeeding	***	breastfeeding_5m	Dietary
1	2014.09	0.0163699	1.51269	0.0218	8	5 months	Daycare	*	daycare_6m	Environmental
1	1939.04	0.0157599	1.45632	0.031	8	5 months	Delivery type	*	delivery_type	Perinatal
1	1307.54	0.0106272	0.982033	0.4817	8	5 months	Hospitalisation		hospital	Perinatal
1	1353.01	0.0109968	1.01618	0.4186	8	5 months	Maternal weight gain		mat_weightgain	Parental
1	1518.33	0.0123405	1.14035	0.2222	8	5 months	Older siblings		older_siblings	Environmental
1	1134.12	0.00921777	0.851788	0.7535	8	5 months	Gestational age		pregn_weeks	Perinatal
1	1273.37	0.0103495	0.956372	0.5382	8	5 months	Prenatal smoking		smoke_before_preg	Parental
1	1343.71	0.0109212	1.0092	0.4304	8	5 months	Siblings in cohort		twins.siblings_in_lucki	Environmental
4	5499.9	0.0447014	1.03268	0.3608	8	5 months	Sequencing batch		bioinfo_batch	Technical variable
1	1764.04	0.0143375	1.32766	0.0778	9	5 months	Compelmentary foods age		ageintrosolids	Dietary
1	1430.19	0.0116241	1.0764	0.302	9	5 months	Father's atopy		atopy_father	Parental
1	2308.82	0.0187654	1.73768	0.004	9	5 months	Mother's atopy	**	atopy_mother	Parental
1	1389.77	0.0112956	1.04598	0.3633	9	5 months	Birth weight		birthweight	Perinatal
1	2818.05	0.0229043	2.12094	0.0003	9	5 months	Breastfeeding	***	breastfeeding_5m	Dietary
1	2019.78	0.0164161	1.52014	0.0201	9	5 months	Daycare	*	daycare_6m	Environmental
1	2005.7	0.0163017	1.50954	0.0219	9	5 months	Delivery type	*	delivery_type	Perinatal
1	1303.04	0.0105907	0.9807	0.4834	9	5 months	Hospitalisation		hospital	Perinatal
1	1318.42	0.0107157	0.99228	0.4572	9	5 months	Maternal weight gain		mat_weightgain	Parental
1	1470.5	0.0119518	1.10674	0.267	9	5 months	Older siblings		older_siblings	Environmental
1	1226.53	0.00996886	0.923121	0.6017	9	5 months	Prenatal smoking		smoke_before_preg	Parental
1	1349.91	0.0109716	1.01598	0.4178	9	5 months	Siblings in cohort		twins.siblings_in_lucki	Environmental
4	5556.81	0.045164	1.04555	0.3184	9	5 months	Sequencing batch		bioinfo_batch	Technical variable
1	1699.96	0.0138167	1.2808	0.0995	10	5 months	Compelmentary foods age		ageintrosolids	Dietary
1	1430.86	0.0116296	1.07806	0.2984	10	5 months	Father's atopy		atopy_father	Parental
1	2330.32	0.0189401	1.75573	0.003	10	5 months	Mother's atopy	**	atopy_mother	Parental
1	1517.04	0.01233	1.14298	0.2186	10	5 months	Birth weight		birthweight	Perinatal
1	2926.53	0.0237859	2.20494	0.0002	10	5 months	Breastfeeding	***	breastfeeding_5m	Dietary
1	2157.62	0.0175364	1.62562	0.0093	10	5 months	Daycare	**	daycare_6m	Environmental
1	2083.5	0.0169341	1.56978	0.0154	10	5 months	Delivery type	*	delivery_type	Perinatal
1	1298.61	0.0105547	0.978414	0.4897	10	5 months	Hospitalisation		hospital	Perinatal
1	1323.92	0.0107604	0.99748	0.448	10	5 months	Maternal weight gain		mat_weightgain	Parental
1	1458.75	0.0118563	1.09907	0.2769	10	5 months	Older siblings		older_siblings	Environmental
1	1467.03	0.0119236	1.10531	0.2644	10	5 months	Siblings in cohort		twins.siblings_in_lucki	Environmental
4	5613.29	0.045623	1.05731	0.2829	10	5 months	Sequencing batch		bioinfo_batch	Technical variable
1	1673.72	0.0136035	1.26141	0.1134	11	5 months	Compelmentary foods age		ageintrosolids	Dietary
1	1383.29	0.011243	1.04253	0.3604	11	5 months	Father's atopy		atopy_father	Parental
1	2331.2	0.0189472	1.75692	0.0033	11	5 months	Mother's atopy	**	atopy_mother	Parental
1	1525.34	0.0123975	1.14958	0.2099	11	5 months	Birth weight		birthweight	Perinatal
1	2877.43	0.0233868	2.16859	0.0003	11	5 months	Breastfeeding	***	breastfeeding_5m	Dietary
1	2147.15	0.0174514	1.61821	0.0098	11	5 months	Daycare	**	daycare_6m	Environmental
1	2130.87	0.017319	1.60594	0.013	11	5 months	Delivery type	*	delivery_type	Perinatal
1	1357.23	0.0110312	1.02288	0.404	11	5 months	Maternal weight gain		mat_weightgain	Parental
1	1425.88	0.0115891	1.07462	0.3132	11	5 months	Older siblings		older_siblings	Environmental
1	1463.12	0.0118918	1.10269	0.2676	11	5 months	Siblings in cohort		twins.siblings_in_lucki	Environmental
4	5713.85	0.0464404	1.07657	0.2328	11	5 months	Sequencing batch		bioinfo_batch	Technical variable
1	1680.17	0.0136559	1.26588	0.1104	12	5 months	Compelmentary foods age		ageintrosolids	Dietary
1	1425.9	0.0115893	1.0743	0.3073	12	5 months	Father's atopy		atopy_father	Parental
1	2202.13	0.0178982	1.65913	0.0078	12	5 months	Mother's atopy	**	atopy_mother	Parental
1	1560.45	0.0126829	1.17568	0.1829	12	5 months	Birth weight		birthweight	Perinatal
1	2856.48	0.0232166	2.15214	0.0002	12	5 months	Breastfeeding	***	breastfeeding_5m	Dietary
1	2165.24	0.0175984	1.63134	0.0091	12	5 months	Daycare	**	daycare_6m	Environmental
1	2027.55	0.0164793	1.5276	0.0211	12	5 months	Delivery type	*	delivery_type	Perinatal
1	1326.86	0.0107843	0.999688	0.4446	12	5 months	Older siblings		older_siblings	Environmental
1	1463.15	0.011892	1.10237	0.2681	12	5 months	Siblings in cohort		twins.siblings_in_lucki	Environmental
4	5912.77	0.0480571	1.1137	0.1491	12	5 months	Sequencing batch		bioinfo_batch	Technical variable
1	1786.92	0.0145235	1.34631	0.0692	13	5 months	Compelmentary foods age		ageintrosolids	Dietary
1	1538.55	0.0125049	1.15918	0.1912	13	5 months	Father's atopy		atopy_father	Parental
1	2199.46	0.0178765	1.65713	0.0076	13	5 months	Mother's atopy	**	atopy_mother	Parental
1	1569.04	0.0127527	1.18216	0.1763	13	5 months	Birth weight		birthweight	Perinatal
1	2860.29	0.0232475	2.15501	0.0002	13	5 months	Breastfeeding	***	breastfeeding_5m	Dietary
1	2436.58	0.0198038	1.83578	0.0022	13	5 months	Daycare	**	daycare_6m	Environmental
1	2041.82	0.0165953	1.53836	0.0196	13	5 months	Delivery type	*	delivery_type	Perinatal
1	1546.31	0.012568	1.16503	0.1912	13	5 months	Siblings in cohort		twins.siblings_in_lucki	Environmental
4	6008.22	0.0488329	1.13169	0.1212	13	5 months	Sequencing batch		bioinfo_batch	Technical variable
1	2047.63	0.0139046	1.23164	0.132	1	6 months	Compelmentary foods age		ageintrosolids	Dietary
1	1947.63	0.0132255	1.17149	0.1814	1	6 months	Father's atopy		atopy_father	Parental
1	3098.88	0.0210432	1.86396	0.0029	1	6 months	Mother's atopy	**	atopy_mother	Parental
1	1186.5	0.00805702	0.713674	0.9465	1	6 months	Birth weight		birthweight	Perinatal
1	1789.05	0.0121487	1.0761	0.3094	1	6 months	Breastfeeding		breastfeeding_6m	Dietary
1	2171.65	0.0147467	1.30623	0.0819	1	6 months	Collected during pandemic		covid_270220	Environmental
1	2784.02	0.0189051	1.67458	0.0066	1	6 months	Daycare	**	daycare_6m	Environmental
1	1453.65	0.00987114	0.874365	0.7068	1	6 months	Delivery place		delivery_place	Perinatal
1	2043.56	0.013877	1.22919	0.1345	1	6 months	Delivery type		delivery_type	Perinatal
1	1956.85	0.0132882	1.17704	0.1813	1	6 months	Formulafeeding		formulafeeding_6m	Dietary
1	1256.16	0.00853008	0.755577	0.9001	1	6 months	Pets		furrypet_home_yn_6m	Environmental
1	1530.39	0.0103923	0.920523	0.6201	1	6 months	Hospitalisation		hospital	Perinatal
1	1295.56	0.00879759	0.779272	0.8662	1	6 months	Intrapartum antibiotics		mat_AB_use_final_delivery	Parental
1	1375.53	0.00934065	0.827375	0.797	1	6 months	Antepartum antibiotics		mat_AB_use_final_preg	Parental
1	2182.2	0.0148184	1.31258	0.0734	1	6 months	Maternal weight gain		mat_weightgain	Parental
1	1402.21	0.00952182	0.843422	0.7687	1	6 months	Older siblings		older_siblings	Environmental
1	1683.11	0.0114293	1.01238	0.4291	1	6 months	Gestational age		pregn_weeks	Perinatal
1	1390.5	0.0094423	0.836379	0.7862	1	6 months	Sex		sex	Perinatal
1	1607.44	0.0109154	0.966865	0.52	1	6 months	Prenatal smoking		smoke_before_preg	Parental
1	1849.24	0.0125574	1.11231	0.2552	1	6 months	Siblings in cohort		twins.siblings_in_lucki	Environmental
4	7748.41	0.0526162	1.16516	0.0685	1	6 months	Sequencing batch		bioinfo_batch	Technical variable
1	2054.47	0.0139511	1.24178	0.1232	2	6 months	Compelmentary foods age		ageintrosolids	Dietary
1	2045.97	0.0138933	1.23664	0.1239	2	6 months	Father's atopy		atopy_father	Parental
1	3096.73	0.0210286	1.87175	0.0027	2	6 months	Mother's atopy	**	atopy_mother	Parental
1	1758.11	0.0119386	1.06265	0.3317	2	6 months	Breastfeeding		breastfeeding_6m	Dietary
1	2136.63	0.014509	1.29144	0.091	2	6 months	Collected during pandemic		covid_270220	Environmental
1	2861.63	0.0194321	1.72965	0.0046	2	6 months	Daycare	**	daycare_6m	Environmental
1	1396.31	0.00948173	0.843967	0.7661	2	6 months	Delivery place		delivery_place	Perinatal
1	2138.45	0.0145213	1.29254	0.0906	2	6 months	Delivery type		delivery_type	Perinatal
1	1930.94	0.0131122	1.16712	0.1914	2	6 months	Formulafeeding		formulafeeding_6m	Dietary
1	1249.45	0.00848451	0.755204	0.901	2	6 months	Pets		furrypet_home_yn_6m	Environmental
1	1501.37	0.0101952	0.907472	0.6465	2	6 months	Hospitalisation		hospital	Perinatal
1	1250.5	0.00849164	0.755839	0.8959	2	6 months	Intrapartum antibiotics		mat_AB_use_final_delivery	Parental
1	1399.23	0.00950158	0.845734	0.7637	2	6 months	Antepartum antibiotics		mat_AB_use_final_preg	Parental
1	2181.48	0.0148135	1.31855	0.0711	2	6 months	Maternal weight gain		mat_weightgain	Parental
1	1376.42	0.00934667	0.831945	0.7892	2	6 months	Older siblings		older_siblings	Environmental
1	1876.03	0.0127393	1.13392	0.2349	2	6 months	Gestational age		pregn_weeks	Perinatal
1	1406.65	0.00955197	0.850219	0.7556	2	6 months	Sex		sex	Perinatal
1	1649	0.0111976	0.9967	0.4565	2	6 months	Prenatal smoking		smoke_before_preg	Parental
1	1910.37	0.0129725	1.15468	0.1994	2	6 months	Siblings in cohort		twins.siblings_in_lucki	Environmental
4	7690.69	0.0522242	1.16212	0.072	2	6 months	Sequencing batch		bioinfo_batch	Technical variable
1	2093.15	0.0142137	1.27034	0.1035	3	6 months	Compelmentary foods age		ageintrosolids	Dietary
1	2049.54	0.0139175	1.24387	0.119	3	6 months	Father's atopy		atopy_father	Parental
1	3003.47	0.0203953	1.82282	0.0032	3	6 months	Mother's atopy	**	atopy_mother	Parental
1	1756.61	0.0119284	1.06609	0.3265	3	6 months	Breastfeeding		breastfeeding_6m	Dietary
1	2123.75	0.0144215	1.28891	0.0912	3	6 months	Collected during pandemic		covid_270220	Environmental
1	2850.19	0.0193544	1.72979	0.0042	3	6 months	Daycare	**	daycare_6m	Environmental
1	1400.5	0.00951024	0.849972	0.7537	3	6 months	Delivery place		delivery_place	Perinatal
1	2136.7	0.0145094	1.29677	0.0882	3	6 months	Delivery type		delivery_type	Perinatal
1	1939.57	0.0131708	1.17713	0.1811	3	6 months	Formulafeeding		formulafeeding_6m	Dietary
1	1519.34	0.0103172	0.922092	0.6109	3	6 months	Hospitalisation		hospital	Perinatal
1	1195.99	0.00812147	0.725852	0.93	3	6 months	Intrapartum antibiotics		mat_AB_use_final_delivery	Parental
1	1399.19	0.0095013	0.849173	0.7565	3	6 months	Antepartum antibiotics		mat_AB_use_final_preg	Parental
1	2175.17	0.0147707	1.32012	0.0723	3	6 months	Maternal weight gain		mat_weightgain	Parental
1	1326.19	0.00900563	0.804873	0.8367	3	6 months	Older siblings		older_siblings	Environmental
1	1879.39	0.0127621	1.14061	0.2254	3	6 months	Gestational age		pregn_weeks	Perinatal
1	1431.85	0.00972307	0.868995	0.719	3	6 months	Sex		sex	Perinatal
1	1771.71	0.0120309	1.07526	0.3099	3	6 months	Prenatal smoking		smoke_before_preg	Parental
1	1980.62	0.0134496	1.20205	0.1487	3	6 months	Siblings in cohort		twins.siblings_in_lucki	Environmental
4	7814.82	0.0530671	1.18571	0.0499	3	6 months	Sequencing batch	*	bioinfo_batch	Technical variable
1	2043.58	0.0138771	1.24586	0.1206	4	6 months	Compelmentary foods age		ageintrosolids	Dietary
1	2054.39	0.0139505	1.25245	0.1115	4	6 months	Father's atopy		atopy_father	Parental
1	3235.01	0.0219676	1.97221	0.0009	4	6 months	Mother's atopy	***	atopy_mother	Parental
1	1766.85	0.0119979	1.07715	0.3038	4	6 months	Breastfeeding		breastfeeding_6m	Dietary
1	2082.93	0.0141443	1.26985	0.1038	4	6 months	Collected during pandemic		covid_270220	Environmental
1	2888.63	0.0196155	1.76104	0.0033	4	6 months	Daycare	**	daycare_6m	Environmental
1	1415.58	0.0096126	0.863	0.7261	4	6 months	Delivery place		delivery_place	Perinatal
1	2142.19	0.0145467	1.30597	0.0835	4	6 months	Delivery type		delivery_type	Perinatal
1	1888.68	0.0128252	1.15142	0.2083	4	6 months	Formulafeeding		formulafeeding_6m	Dietary
1	1513.62	0.0102784	0.922771	0.6089	4	6 months	Hospitalisation		hospital	Perinatal
1	1444.53	0.00980921	0.880651	0.695	4	6 months	Antepartum antibiotics		mat_AB_use_final_preg	Parental
1	2178.8	0.0147953	1.3283	0.0684	4	6 months	Maternal weight gain		mat_weightgain	Parental
1	1332.69	0.00904974	0.812467	0.8217	4	6 months	Older siblings		older_siblings	Environmental
1	1826.31	0.0124017	1.1134	0.2595	4	6 months	Gestational age		pregn_weeks	Perinatal
1	1429.36	0.00970616	0.871399	0.7134	4	6 months	Sex		sex	Perinatal
1	1787.04	0.012135	1.08946	0.2889	4	6 months	Prenatal smoking		smoke_before_preg	Parental
1	1978.83	0.0134374	1.20639	0.1457	4	6 months	Siblings in cohort		twins.siblings_in_lucki	Environmental
4	7837.01	0.0532178	1.19445	0.0435	4	6 months	Sequencing batch	*	bioinfo_batch	Technical variable
1	1951.28	0.0132503	1.19319	0.1657	5	6 months	Compelmentary foods age		ageintrosolids	Dietary
1	2265.05	0.015381	1.38506	0.0469	5	6 months	Father's atopy	*	atopy_father	Parental
1	3221.53	0.021876	1.96995	0.0008	5	6 months	Mother's atopy	***	atopy_mother	Parental
1	1774.18	0.0120477	1.0849	0.2944	5	6 months	Breastfeeding		breastfeeding_6m	Dietary
1	2081.08	0.0141317	1.27257	0.1023	5	6 months	Collected during pandemic		covid_270220	Environmental
1	3007.36	0.0204217	1.83898	0.0015	5	6 months	Daycare	**	daycare_6m	Environmental
1	1461.2	0.00992238	0.893514	0.6685	5	6 months	Delivery place		delivery_place	Perinatal
1	2232.98	0.0151632	1.36545	0.0578	5	6 months	Delivery type		delivery_type	Perinatal
1	1881.99	0.0127798	1.15083	0.2104	5	6 months	Formulafeeding		formulafeeding_6m	Dietary
1	1530.9	0.0103957	0.936138	0.5835	5	6 months	Hospitalisation		hospital	Perinatal
1	1450.29	0.00984832	0.886844	0.6811	5	6 months	Antepartum antibiotics		mat_AB_use_final_preg	Parental
1	2190.31	0.0148734	1.33936	0.0637	5	6 months	Maternal weight gain		mat_weightgain	Parental
1	1776.17	0.0120612	1.08611	0.2994	5	6 months	Gestational age		pregn_weeks	Perinatal
1	1443.36	0.00980125	0.882605	0.6881	5	6 months	Sex		sex	Perinatal
1	1823.95	0.0123857	1.11534	0.2511	5	6 months	Prenatal smoking		smoke_before_preg	Parental
1	1976.07	0.0134187	1.20835	0.143	5	6 months	Siblings in cohort		twins.siblings_in_lucki	Environmental
4	7827.18	0.0531511	1.19657	0.0438	5	6 months	Sequencing batch	*	bioinfo_batch	Technical variable
1	1973.61	0.0134019	1.2091	0.1491	6	6 months	Compelmentary foods age		ageintrosolids	Dietary
1	2242.4	0.0152272	1.37377	0.0502	6	6 months	Father's atopy		atopy_father	Parental
1	3219.44	0.0218619	1.97234	0.0007	6	6 months	Mother's atopy	***	atopy_mother	Parental
1	1740.59	0.0118196	1.06635	0.3242	6	6 months	Breastfeeding		breastfeeding_6m	Dietary
1	2109.73	0.0143263	1.29249	0.0903	6	6 months	Collected during pandemic		covid_270220	Environmental
1	3015.24	0.0204752	1.84724	0.0015	6	6 months	Daycare	**	daycare_6m	Environmental
1	1460.19	0.00991555	0.894565	0.6662	6	6 months	Delivery place		delivery_place	Perinatal
1	2205.13	0.0149741	1.35094	0.0636	6	6 months	Delivery type		delivery_type	Perinatal
1	1917.31	0.0130197	1.17461	0.1797	6	6 months	Formulafeeding		formulafeeding_6m	Dietary
1	1523.15	0.0103431	0.933135	0.5904	6	6 months	Hospitalisation		hospital	Perinatal
1	1439.51	0.00977512	0.881896	0.6919	6	6 months	Antepartum antibiotics		mat_AB_use_final_preg	Parental
1	2176.92	0.0147825	1.33366	0.0653	6	6 months	Maternal weight gain		mat_weightgain	Parental
1	1771.01	0.0120262	1.08499	0.3001	6	6 months	Gestational age		pregn_weeks	Perinatal
1	1856.65	0.0126078	1.13745	0.223	6	6 months	Prenatal smoking		smoke_before_preg	Parental
1	1984.24	0.0134741	1.21562	0.1375	6	6 months	Siblings in cohort		twins.siblings_in_lucki	Environmental
4	7737.79	0.0525441	1.18511	0.0505	6	6 months	Sequencing batch		bioinfo_batch	Technical variable
1	2026.37	0.0137602	1.24372	0.1225	7	6 months	Compelmentary foods age		ageintrosolids	Dietary
1	2292.76	0.0155692	1.40723	0.0407	7	6 months	Father's atopy	*	atopy_father	Parental
1	3133.86	0.0212807	1.92346	0.0012	7	6 months	Mother's atopy	**	atopy_mother	Parental
1	1742.23	0.0118307	1.06932	0.3173	7	6 months	Breastfeeding		breastfeeding_6m	Dietary
1	2089.85	0.0141913	1.28268	0.0966	7	6 months	Collected during pandemic		covid_270220	Environmental
1	2976.61	0.0202129	1.82695	0.002	7	6 months	Daycare	**	daycare_6m	Environmental
1	1339.38	0.00909514	0.822067	0.8037	7	6 months	Delivery place		delivery_place	Perinatal
1	2202.61	0.014957	1.35189	0.0636	7	6 months	Delivery type		delivery_type	Perinatal
1	1826.42	0.0124025	1.121	0.2479	7	6 months	Formulafeeding		formulafeeding_6m	Dietary
1	1562.8	0.0106123	0.959196	0.5338	7	6 months	Hospitalisation		hospital	Perinatal
1	2075.22	0.0140919	1.2737	0.096	7	6 months	Maternal weight gain		mat_weightgain	Parental
1	1781.78	0.0120993	1.0936	0.2871	7	6 months	Gestational age		pregn_weeks	Perinatal
1	1875.46	0.0127354	1.15109	0.2057	7	6 months	Prenatal smoking		smoke_before_preg	Parental
1	2037.21	0.0138338	1.25038	0.1109	7	6 months	Siblings in cohort		twins.siblings_in_lucki	Environmental
4	7749.23	0.0526217	1.18906	0.0484	7	6 months	Sequencing batch	*	bioinfo_batch	Technical variable
1	2026.39	0.0137604	1.24715	0.1213	8	6 months	Compelmentary foods age		ageintrosolids	Dietary
1	2261.45	0.0153565	1.39181	0.0453	8	6 months	Father's atopy	*	atopy_father	Parental
1	3265.96	0.0221778	2.01005	0.0005	8	6 months	Mother's atopy	***	atopy_mother	Parental
1	1744.36	0.0118452	1.07357	0.3102	8	6 months	Breastfeeding		breastfeeding_6m	Dietary
1	2103.03	0.0142808	1.29432	0.0899	8	6 months	Collected during pandemic		covid_270220	Environmental
1	2985.29	0.0202718	1.8373	0.0018	8	6 months	Daycare	**	daycare_6m	Environmental
1	2239.49	0.0152075	1.3783	0.053	8	6 months	Delivery type		delivery_type	Perinatal
1	1777.43	0.0120698	1.09393	0.2898	8	6 months	Formulafeeding		formulafeeding_6m	Dietary
1	1614.55	0.0109637	0.993678	0.4654	8	6 months	Hospitalisation		hospital	Perinatal
1	2065.23	0.0140241	1.27105	0.0982	8	6 months	Maternal weight gain		mat_weightgain	Parental
1	1751.93	0.0118966	1.07823	0.3091	8	6 months	Gestational age		pregn_weeks	Perinatal
1	1814.59	0.0123221	1.11679	0.2482	8	6 months	Prenatal smoking		smoke_before_preg	Parental
1	1944.17	0.0132021	1.19655	0.1586	8	6 months	Siblings in cohort		twins.siblings_in_lucki	Environmental
4	7701.55	0.052298	1.18499	0.0517	8	6 months	Sequencing batch		bioinfo_batch	Technical variable
1	2049	0.0139139	1.26119	0.1104	9	6 months	Compelmentary foods age		ageintrosolids	Dietary
1	2241.61	0.0152218	1.37974	0.0487	9	6 months	Father's atopy	*	atopy_father	Parental
1	3267.99	0.0221915	2.01149	0.0005	9	6 months	Mother's atopy	***	atopy_mother	Parental
1	1773.37	0.0120422	1.09153	0.2817	9	6 months	Breastfeeding		breastfeeding_6m	Dietary
1	2375.66	0.0161321	1.46225	0.029	9	6 months	Collected during pandemic	*	covid_270220	Environmental
1	3073.49	0.0208708	1.89177	0.001	9	6 months	Daycare	**	daycare_6m	Environmental
1	2275.7	0.0154533	1.40072	0.0464	9	6 months	Delivery type	*	delivery_type	Perinatal
1	1729.2	0.0117423	1.06435	0.3339	9	6 months	Formulafeeding		formulafeeding_6m	Dietary
1	2046.59	0.0138976	1.2597	0.1061	9	6 months	Maternal weight gain		mat_weightgain	Parental
1	1856.66	0.0126078	1.1428	0.2212	9	6 months	Gestational age		pregn_weeks	Perinatal
1	1790.44	0.0121581	1.10204	0.2665	9	6 months	Prenatal smoking		smoke_before_preg	Parental
1	1983.45	0.0134687	1.22083	0.1351	9	6 months	Siblings in cohort		twins.siblings_in_lucki	Environmental
4	7893.8	0.0536035	1.21468	0.0345	9	6 months	Sequencing batch	*	bioinfo_batch	Technical variable
1	1952.8	0.0132606	1.20082	0.1575	10	6 months	Compelmentary foods age		ageintrosolids	Dietary
1	2200.7	0.014944	1.35326	0.0547	10	6 months	Father's atopy		atopy_father	Parental
1	3388.42	0.0230093	2.08361	0.0003	10	6 months	Mother's atopy	***	atopy_mother	Parental
1	3120.41	0.0211894	1.9188	0.0011	10	6 months	Breastfeeding	**	breastfeeding_6m	Dietary
1	2340.68	0.0158945	1.43933	0.0338	10	6 months	Collected during pandemic	*	covid_270220	Environmental
1	3188.72	0.0216533	1.96081	0.0007	10	6 months	Daycare	***	daycare_6m	Environmental
1	2450.45	0.01664	1.50684	0.0245	10	6 months	Delivery type	*	delivery_type	Perinatal
1	1949.33	0.0132371	1.19868	0.1575	10	6 months	Maternal weight gain		mat_weightgain	Parental
1	1849.36	0.0125582	1.13721	0.2289	10	6 months	Gestational age		pregn_weeks	Perinatal
1	1660.36	0.0112748	1.02099	0.4065	10	6 months	Prenatal smoking		smoke_before_preg	Parental
1	2082.87	0.0141439	1.2808	0.0942	10	6 months	Siblings in cohort		twins.siblings_in_lucki	Environmental
4	7910.09	0.0537141	1.21602	0.0332	10	6 months	Sequencing batch	*	bioinfo_batch	Technical variable
1	1950.36	0.0132441	1.19895	0.1589	11	6 months	Compelmentary foods age		ageintrosolids	Dietary
1	2198.49	0.014929	1.35148	0.0561	11	6 months	Father's atopy		atopy_father	Parental
1	3401.99	0.0231015	2.09131	0.0003	11	6 months	Mother's atopy	***	atopy_mother	Parental
1	3087.79	0.0209679	1.89816	0.0016	11	6 months	Breastfeeding	**	breastfeeding_6m	Dietary
1	2496.12	0.0169501	1.53444	0.0169	11	6 months	Collected during pandemic	*	covid_270220	Environmental
1	3174	0.0215533	1.95116	0.0008	11	6 months	Daycare	***	daycare_6m	Environmental
1	2452.6	0.0166546	1.50769	0.0242	11	6 months	Delivery type	*	delivery_type	Perinatal
1	1872.62	0.0127161	1.15116	0.2068	11	6 months	Maternal weight gain		mat_weightgain	Parental
1	1837.05	0.0124747	1.1293	0.2392	11	6 months	Gestational age		pregn_weeks	Perinatal
1	1986.47	0.0134893	1.22115	0.1351	11	6 months	Siblings in cohort		twins.siblings_in_lucki	Environmental
4	8039.99	0.0545962	1.23561	0.0244	11	6 months	Sequencing batch	*	bioinfo_batch	Technical variable
1	2121.31	0.0144049	1.3016	0.0855	12	6 months	Compelmentary foods age		ageintrosolids	Dietary
1	2266.66	0.0153919	1.39078	0.0445	12	6 months	Father's atopy	*	atopy_father	Parental
1	3374.11	0.0229122	2.07029	0.0004	12	6 months	Mother's atopy	***	atopy_mother	Parental
1	3123.46	0.0212101	1.9165	0.0013	12	6 months	Breastfeeding	**	breastfeeding_6m	Dietary
1	2496.68	0.0169539	1.53192	0.0172	12	6 months	Collected during pandemic	*	covid_270220	Environmental
1	3176.17	0.021568	1.94884	0.0008	12	6 months	Daycare	***	daycare_6m	Environmental
1	2460.61	0.0167089	1.50978	0.0241	12	6 months	Delivery type	*	delivery_type	Perinatal
1	1842.43	0.0125112	1.13048	0.2326	12	6 months	Maternal weight gain		mat_weightgain	Parental
1	1959.73	0.0133077	1.20246	0.1526	12	6 months	Siblings in cohort		twins.siblings_in_lucki	Environmental
4	8062.08	0.0547462	1.23669	0.0238	12	6 months	Sequencing batch	*	bioinfo_batch	Technical variable
1	2069.13	0.0140506	1.26722	0.1048	13	6 months	Compelmentary foods age		ageintrosolids	Dietary
1	2264.33	0.0153761	1.38676	0.0449	13	6 months	Father's atopy	*	atopy_father	Parental
1	3892.56	0.0264327	2.38396	0.0001	13	6 months	Mother's atopy	***	atopy_mother	Parental
1	3348.88	0.0227408	2.05099	0.0004	13	6 months	Breastfeeding	***	breastfeeding_6m	Dietary
1	2488.05	0.0168953	1.52378	0.018	13	6 months	Collected during pandemic	*	covid_270220	Environmental
1	3422.66	0.0232418	2.09617	0.0005	13	6 months	Daycare	***	daycare_6m	Environmental
1	2597.89	0.0176412	1.59105	0.0139	13	6 months	Delivery type	*	delivery_type	Perinatal
1	2118.68	0.0143871	1.29757	0.0814	13	6 months	Siblings in cohort		twins.siblings_in_lucki	Environmental
4	8216.75	0.0557965	1.25807	0.0174	13	6 months	Sequencing batch	*	bioinfo_batch	Technical variable
1	2112.29	0.0139393	1.03044	0.3766	1	14 months	Compelmentary foods age		ageintrosolids	Dietary
1	2226.63	0.0146938	1.08622	0.2711	1	14 months	Father's atopy		atopy_father	Parental
1	1870.35	0.0123427	0.912422	0.6316	1	14 months	Mother's atopy		atopy_mother	Parental
1	1320.56	0.00871455	0.644214	0.9932	1	14 months	Birth weight		birthweight	Perinatal
1	1940.21	0.0128037	0.946503	0.5568	1	14 months	Breastfeeding		breastfeeding_14m	Dietary
1	1919.02	0.0126639	0.936165	0.5961	1	14 months	Collected during pandemic		covid_270220	Environmental
1	2382.89	0.015725	1.16246	0.1788	1	14 months	Daycare		daycare_14m	Environmental
1	1854.97	0.0122412	0.904916	0.6562	1	14 months	Delivery place		delivery_place	Perinatal
1	1781.08	0.0117536	0.868872	0.7392	1	14 months	Delivery type		delivery_type	Perinatal
1	1988.62	0.0131232	0.970118	0.4992	1	14 months	Formulafeeding		formulafeeding_14m	Dietary
1	2229.03	0.0147097	1.0874	0.2717	1	14 months	Pets		furrypet_home_yn_14m	Environmental
1	1931.57	0.0127467	0.942286	0.5633	1	14 months	Hospitalisation		hospital	Perinatal
1	2170.79	0.0143253	1.05898	0.3199	1	14 months	Antibiotics		inf_ab_14m	Infant's health
1	2088.47	0.0137821	1.01883	0.3875	1	14 months	Intrapartum antibiotics		mat_AB_use_final_delivery	Parental
1	2129.55	0.0140532	1.03887	0.3563	1	14 months	Antepartum antibiotics		mat_AB_use_final_preg	Parental
1	2120.23	0.0139917	1.03432	0.374	1	14 months	Maternal weight gain		mat_weightgain	Parental
1	2218.27	0.0146387	1.08215	0.2897	1	14 months	Older siblings		older_siblings	Environmental
1	2094.89	0.0138245	1.02196	0.3854	1	14 months	Gestational age		pregn_weeks	Perinatal
1	1972.76	0.0130185	0.96238	0.5125	1	14 months	Sex		sex	Perinatal
1	2367.67	0.0156246	1.15503	0.178	1	14 months	Prenatal smoking		smoke_before_preg	Parental
1	2681.33	0.0176945	1.30804	0.0712	1	14 months	Siblings in cohort		twins.siblings_in_lucki	Environmental
3	5773.76	0.0381019	0.938879	0.6861	1	14 months	Sequencing batch		bioinfo_batch	Technical variable
1	2134.86	0.0140883	1.04924	0.341	2	14 months	Compelmentary foods age		ageintrosolids	Dietary
1	2261.06	0.014921	1.11126	0.2386	2	14 months	Father's atopy		atopy_father	Parental
1	1862.63	0.0122917	0.915439	0.6251	2	14 months	Mother's atopy		atopy_mother	Parental
1	1946.46	0.0128449	0.956639	0.5361	2	14 months	Breastfeeding		breastfeeding_14m	Dietary
1	1946.81	0.0128473	0.956813	0.5464	2	14 months	Collected during pandemic		covid_270220	Environmental
1	2527.29	0.016678	1.24211	0.111	2	14 months	Daycare		daycare_14m	Environmental
1	1856.42	0.0122508	0.912387	0.6383	2	14 months	Delivery place		delivery_place	Perinatal
1	1829.44	0.0120727	0.899128	0.6704	2	14 months	Delivery type		delivery_type	Perinatal
1	1982.4	0.0130821	0.974304	0.4912	2	14 months	Formulafeeding		formulafeeding_14m	Dietary
1	2223.36	0.0146723	1.09273	0.2648	2	14 months	Pets		furrypet_home_yn_14m	Environmental
1	1940.14	0.0128032	0.953533	0.5379	2	14 months	Hospitalisation		hospital	Perinatal
1	2151.11	0.0141955	1.05722	0.3274	2	14 months	Antibiotics		inf_ab_14m	Infant's health
1	2083.64	0.0137502	1.02406	0.3757	2	14 months	Intrapartum antibiotics		mat_AB_use_final_delivery	Parental
1	2131.94	0.014069	1.0478	0.3408	2	14 months	Antepartum antibiotics		mat_AB_use_final_preg	Parental
1	2128.69	0.0140476	1.0462	0.3542	2	14 months	Maternal weight gain		mat_weightgain	Parental
1	2215.8	0.0146224	1.08902	0.2775	2	14 months	Older siblings		older_siblings	Environmental
1	2301.32	0.0151867	1.13105	0.209	2	14 months	Gestational age		pregn_weeks	Perinatal
1	1947.81	0.0128538	0.957302	0.5267	2	14 months	Sex		sex	Perinatal
1	2426.7	0.0160141	1.19267	0.1406	2	14 months	Prenatal smoking		smoke_before_preg	Parental
1	2776.7	0.0183238	1.36468	0.0512	2	14 months	Siblings in cohort		twins.siblings_in_lucki	Environmental
3	5770.7	0.0380816	0.945388	0.664	2	14 months	Sequencing batch		bioinfo_batch	Technical variable
1	2112.58	0.0139412	1.04043	0.3588	3	14 months	Compelmentary foods age		ageintrosolids	Dietary
1	2261.32	0.0149228	1.11368	0.2343	3	14 months	Father's atopy		atopy_father	Parental
1	1946.53	0.0128454	0.958648	0.5227	3	14 months	Mother's atopy		atopy_mother	Parental
1	1979.99	0.0130663	0.975129	0.4939	3	14 months	Breastfeeding		breastfeeding_14m	Dietary
1	1979.24	0.0130613	0.974759	0.504	3	14 months	Collected during pandemic		covid_270220	Environmental
1	2556.3	0.0168694	1.25895	0.1005	3	14 months	Daycare		daycare_14m	Environmental
1	1867.96	0.012327	0.919956	0.6207	3	14 months	Delivery place		delivery_place	Perinatal
1	1968.71	0.0129918	0.969571	0.4999	3	14 months	Formulafeeding		formulafeeding_14m	Dietary
1	2210.3	0.014586	1.08855	0.2697	3	14 months	Pets		furrypet_home_yn_14m	Environmental
1	1926.47	0.012713	0.948768	0.5487	3	14 months	Hospitalisation		hospital	Perinatal
1	2060.38	0.0135967	1.01472	0.4046	3	14 months	Antibiotics		inf_ab_14m	Infant's health
1	2181.35	0.0143951	1.0743	0.2795	3	14 months	Intrapartum antibiotics		mat_AB_use_final_delivery	Parental
1	2170.87	0.0143259	1.06913	0.3015	3	14 months	Antepartum antibiotics		mat_AB_use_final_preg	Parental
1	1969.17	0.0129948	0.9698	0.519	3	14 months	Maternal weight gain		mat_weightgain	Parental
1	2196.71	0.0144964	1.08186	0.2901	3	14 months	Older siblings		older_siblings	Environmental
1	2251.41	0.0148574	1.1088	0.2396	3	14 months	Gestational age		pregn_weeks	Perinatal
1	1964.24	0.0129623	0.96737	0.5041	3	14 months	Sex		sex	Perinatal
1	2245.78	0.0148202	1.10603	0.2364	3	14 months	Prenatal smoking		smoke_before_preg	Parental
1	2787.56	0.0183955	1.37285	0.0467	3	14 months	Siblings in cohort	*	twins.siblings_in_lucki	Environmental
3	5917.86	0.0390528	0.971498	0.5714	3	14 months	Sequencing batch		bioinfo_batch	Technical variable
1	1763.76	0.0116393	0.870028	0.7357	4	14 months	Compelmentary foods age		ageintrosolids	Dietary
1	2228.74	0.0147078	1.09939	0.2535	4	14 months	Father's atopy		atopy_father	Parental
1	1991.44	0.0131418	0.982339	0.4659	4	14 months	Mother's atopy		atopy_mother	Parental
1	1965.64	0.0129715	0.969612	0.5016	4	14 months	Breastfeeding		breastfeeding_14m	Dietary
1	1922.62	0.0126877	0.948393	0.5683	4	14 months	Collected during pandemic		covid_270220	Environmental
1	2557.06	0.0168744	1.26135	0.099	4	14 months	Daycare		daycare_14m	Environmental
1	1966.49	0.0129772	0.970032	0.5	4	14 months	Formulafeeding		formulafeeding_14m	Dietary
1	2209.03	0.0145777	1.08967	0.2679	4	14 months	Pets		furrypet_home_yn_14m	Environmental
1	1865.91	0.0123134	0.920419	0.6202	4	14 months	Hospitalisation		hospital	Perinatal
1	2065.67	0.0136317	1.01896	0.396	4	14 months	Antibiotics		inf_ab_14m	Infant's health
1	2182.5	0.0144026	1.07659	0.2766	4	14 months	Intrapartum antibiotics		mat_AB_use_final_delivery	Parental
1	2189.27	0.0144473	1.07992	0.2821	4	14 months	Antepartum antibiotics		mat_AB_use_final_preg	Parental
1	1983.41	0.0130888	0.978378	0.498	4	14 months	Maternal weight gain		mat_weightgain	Parental
1	2147.14	0.0141692	1.05914	0.3272	4	14 months	Older siblings		older_siblings	Environmental
1	2242.29	0.0147972	1.10608	0.242	4	14 months	Gestational age		pregn_weeks	Perinatal
1	1968.71	0.0129918	0.971126	0.4952	4	14 months	Sex		sex	Perinatal
1	2282.28	0.0150611	1.1258	0.2084	4	14 months	Prenatal smoking		smoke_before_preg	Parental
1	2813.13	0.0185642	1.38766	0.0447	4	14 months	Siblings in cohort	*	twins.siblings_in_lucki	Environmental
3	5900.33	0.0389371	0.970173	0.5726	4	14 months	Sequencing batch		bioinfo_batch	Technical variable
1	2237.26	0.014764	1.10642	0.2438	5	14 months	Father's atopy		atopy_father	Parental
1	1981.06	0.0130733	0.979714	0.471	5	14 months	Mother's atopy		atopy_mother	Parental
1	1989.79	0.0131309	0.98403	0.4713	5	14 months	Breastfeeding		breastfeeding_14m	Dietary
1	1899.11	0.0125325	0.939187	0.5917	5	14 months	Collected during pandemic		covid_270220	Environmental
1	2541.38	0.0167709	1.25681	0.0995	5	14 months	Daycare		daycare_14m	Environmental
1	2006.62	0.0132419	0.992354	0.447	5	14 months	Formulafeeding		formulafeeding_14m	Dietary
1	2279.49	0.0150426	1.1273	0.2181	5	14 months	Pets		furrypet_home_yn_14m	Environmental
1	1876.76	0.012385	0.928133	0.6001	5	14 months	Hospitalisation		hospital	Perinatal
1	1978.45	0.0130561	0.978423	0.484	5	14 months	Antibiotics		inf_ab_14m	Infant's health
1	2182.79	0.0144045	1.07948	0.272	5	14 months	Intrapartum antibiotics		mat_AB_use_final_delivery	Parental
1	2184.64	0.0144167	1.08039	0.2805	5	14 months	Antepartum antibiotics		mat_AB_use_final_preg	Parental
1	2105.97	0.0138976	1.04149	0.3589	5	14 months	Maternal weight gain		mat_weightgain	Parental
1	2053.57	0.0135518	1.01558	0.413	5	14 months	Older siblings		older_siblings	Environmental
1	2225.79	0.0146883	1.10074	0.25	5	14 months	Gestational age		pregn_weeks	Perinatal
1	2034.5	0.0134259	1.00614	0.4172	5	14 months	Sex		sex	Perinatal
1	2311.64	0.0152548	1.1432	0.1908	5	14 months	Prenatal smoking		smoke_before_preg	Parental
1	2764.09	0.0182406	1.36695	0.0504	5	14 months	Siblings in cohort		twins.siblings_in_lucki	Environmental
3	5948.41	0.0392544	0.980578	0.534	5	14 months	Sequencing batch		bioinfo_batch	Technical variable
1	2350.8	0.0155133	1.16418	0.1686	6	14 months	Father's atopy		atopy_father	Parental
1	2029.22	0.0133911	1.00492	0.4183	6	14 months	Mother's atopy		atopy_mother	Parental
1	2026.71	0.0133745	1.00368	0.4264	6	14 months	Breastfeeding		breastfeeding_14m	Dietary
1	1897.02	0.0125187	0.939453	0.5916	6	14 months	Collected during pandemic		covid_270220	Environmental
1	2517.18	0.0166112	1.24657	0.105	6	14 months	Daycare		daycare_14m	Environmental
1	1968.65	0.0129914	0.974925	0.4977	6	14 months	Formulafeeding		formulafeeding_14m	Dietary
1	2339.34	0.0154376	1.1585	0.185	6	14 months	Pets		furrypet_home_yn_14m	Environmental
1	1977.79	0.0130517	0.97945	0.483	6	14 months	Antibiotics		inf_ab_14m	Infant's health
1	2095.96	0.0138315	1.03797	0.3472	6	14 months	Intrapartum antibiotics		mat_AB_use_final_delivery	Parental
1	2250.78	0.0148532	1.11464	0.2281	6	14 months	Antepartum antibiotics		mat_AB_use_final_preg	Parental
1	2132.98	0.0140758	1.05631	0.3311	6	14 months	Maternal weight gain		mat_weightgain	Parental
1	2292.7	0.0151298	1.1354	0.2129	6	14 months	Older siblings		older_siblings	Environmental
1	2390.82	0.0157773	1.18399	0.1577	6	14 months	Gestational age		pregn_weeks	Perinatal
1	2029.26	0.0133914	1.00494	0.4206	6	14 months	Sex		sex	Perinatal
1	2301.39	0.0151872	1.13971	0.1936	6	14 months	Prenatal smoking		smoke_before_preg	Parental
1	2760.2	0.018215	1.36692	0.0506	6	14 months	Siblings in cohort		twins.siblings_in_lucki	Environmental
3	5914	0.0390273	0.976254	0.5475	6	14 months	Sequencing batch		bioinfo_batch	Technical variable
1	2530.55	0.0166995	1.25463	0.0983	7	14 months	Father's atopy		atopy_father	Parental
1	2029.42	0.0133925	1.00617	0.4174	7	14 months	Mother's atopy		atopy_mother	Parental
1	2007.58	0.0132483	0.995341	0.4435	7	14 months	Breastfeeding		breastfeeding_14m	Dietary
1	2441.46	0.0161116	1.21046	0.1322	7	14 months	Daycare		daycare_14m	Environmental
1	2032.03	0.0134097	1.00747	0.4227	7	14 months	Formulafeeding		formulafeeding_14m	Dietary
1	2368.4	0.0156294	1.17423	0.1681	7	14 months	Pets		furrypet_home_yn_14m	Environmental
1	1962.37	0.0129499	0.972925	0.4956	7	14 months	Antibiotics		inf_ab_14m	Infant's health
1	2097.24	0.0138399	1.03979	0.3447	7	14 months	Intrapartum antibiotics		mat_AB_use_final_delivery	Parental
1	2213.81	0.0146092	1.09759	0.2504	7	14 months	Antepartum antibiotics		mat_AB_use_final_preg	Parental
1	2144.76	0.0141536	1.06335	0.3181	7	14 months	Maternal weight gain		mat_weightgain	Parental
1	2267.87	0.014966	1.12439	0.2259	7	14 months	Older siblings		older_siblings	Environmental
1	2389.34	0.0157676	1.18462	0.1572	7	14 months	Gestational age		pregn_weeks	Perinatal
1	1949.18	0.0128629	0.966388	0.5069	7	14 months	Sex		sex	Perinatal
1	2309.83	0.0152429	1.1452	0.1849	7	14 months	Prenatal smoking		smoke_before_preg	Parental
1	2836.91	0.0187211	1.40651	0.0407	7	14 months	Siblings in cohort	*	twins.siblings_in_lucki	Environmental
3	7665.79	0.0505876	1.26688	0.0266	7	14 months	Sequencing batch	*	bioinfo_batch	Technical variable
1	2619.96	0.0172895	1.29976	0.0747	8	14 months	Father's atopy		atopy_father	Parental
1	2004.83	0.0132302	0.994598	0.4383	8	14 months	Mother's atopy		atopy_mother	Parental
1	1981.83	0.0130784	0.983187	0.4708	8	14 months	Breastfeeding		breastfeeding_14m	Dietary
1	2418.46	0.0159597	1.1998	0.1411	8	14 months	Daycare		daycare_14m	Environmental
1	1959.76	0.0129327	0.972239	0.5007	8	14 months	Formulafeeding		formulafeeding_14m	Dietary
1	2361.13	0.0155814	1.17136	0.1703	8	14 months	Pets		furrypet_home_yn_14m	Environmental
1	1938.28	0.012791	0.961584	0.5196	8	14 months	Antibiotics		inf_ab_14m	Infant's health
1	2104.82	0.01389	1.0442	0.3354	8	14 months	Intrapartum antibiotics		mat_AB_use_final_delivery	Parental
1	2273.03	0.015	1.12765	0.2107	8	14 months	Antepartum antibiotics		mat_AB_use_final_preg	Parental
1	2140.3	0.0141241	1.0618	0.3188	8	14 months	Maternal weight gain		mat_weightgain	Parental
1	2266.84	0.0149592	1.12458	0.2259	8	14 months	Older siblings		older_siblings	Environmental
1	2388.73	0.0157636	1.18505	0.1549	8	14 months	Gestational age		pregn_weeks	Perinatal
1	2269.78	0.0149786	1.12604	0.2077	8	14 months	Prenatal smoking		smoke_before_preg	Parental
1	2777.96	0.0183321	1.37815	0.0476	8	14 months	Siblings in cohort	*	twins.siblings_in_lucki	Environmental
3	7765.37	0.0512447	1.28413	0.0204	8	14 months	Sequencing batch	*	bioinfo_batch	Technical variable
1	2640.82	0.0174271	1.31103	0.0684	9	14 months	Father's atopy		atopy_father	Parental
1	1971.15	0.0130079	0.978572	0.4735	9	14 months	Mother's atopy		atopy_mother	Parental
1	1936.57	0.0127797	0.961403	0.5247	9	14 months	Breastfeeding		breastfeeding_14m	Dietary
1	2441.76	0.0161135	1.2122	0.1296	9	14 months	Daycare		daycare_14m	Environmental
1	2051.45	0.0135378	1.01844	0.3994	9	14 months	Formulafeeding		formulafeeding_14m	Dietary
1	2333.35	0.0153981	1.15838	0.1798	9	14 months	Pets		furrypet_home_yn_14m	Environmental
1	2063.2	0.0136153	1.02427	0.3748	9	14 months	Intrapartum antibiotics		mat_AB_use_final_delivery	Parental
1	2177.42	0.0143691	1.08098	0.2749	9	14 months	Antepartum antibiotics		mat_AB_use_final_preg	Parental
1	2125.67	0.0140276	1.05528	0.3326	9	14 months	Maternal weight gain		mat_weightgain	Parental
1	2230.54	0.0147196	1.10734	0.2491	9	14 months	Older siblings		older_siblings	Environmental
1	2725.09	0.0179833	1.35286	0.054	9	14 months	Gestational age		pregn_weeks	Perinatal
1	2203.75	0.0145429	1.09405	0.2534	9	14 months	Prenatal smoking		smoke_before_preg	Parental
1	2793.9	0.0184373	1.38702	0.0451	9	14 months	Siblings in cohort	*	twins.siblings_in_lucki	Environmental
3	7612.37	0.0502351	1.25971	0.0284	9	14 months	Sequencing batch	*	bioinfo_batch	Technical variable
1	2714.92	0.0179161	1.34874	0.0538	10	14 months	Father's atopy		atopy_father	Parental
1	1928.85	0.0127288	0.958234	0.5188	10	14 months	Mother's atopy		atopy_mother	Parental
1	2434.18	0.0160635	1.20928	0.1342	10	14 months	Daycare		daycare_14m	Environmental
1	2454.52	0.0161977	1.21938	0.1183	10	14 months	Formulafeeding		formulafeeding_14m	Dietary
1	2401.29	0.0158464	1.19293	0.1489	10	14 months	Pets		furrypet_home_yn_14m	Environmental
1	2102.59	0.0138753	1.04455	0.3368	10	14 months	Intrapartum antibiotics		mat_AB_use_final_delivery	Parental
1	2086.31	0.0137679	1.03646	0.3526	10	14 months	Antepartum antibiotics		mat_AB_use_final_preg	Parental
1	2170.76	0.0143251	1.07841	0.289	10	14 months	Maternal weight gain		mat_weightgain	Parental
1	2420.88	0.0159757	1.20267	0.1387	10	14 months	Older siblings		older_siblings	Environmental
1	2783.67	0.0183699	1.3829	0.0448	10	14 months	Gestational age	*	pregn_weeks	Perinatal
1	2163.29	0.0142758	1.0747	0.2853	10	14 months	Prenatal smoking		smoke_before_preg	Parental
1	2931.37	0.0193445	1.45627	0.0291	10	14 months	Siblings in cohort	*	twins.siblings_in_lucki	Environmental
3	7641.48	0.0504272	1.2654	0.0258	10	14 months	Sequencing batch	*	bioinfo_batch	Technical variable
1	2721.62	0.0179604	1.35306	0.0537	11	14 months	Father's atopy		atopy_father	Parental
1	2461.61	0.0162445	1.2238	0.121	11	14 months	Daycare		daycare_14m	Environmental
1	2474.82	0.0163317	1.23036	0.1119	11	14 months	Formulafeeding		formulafeeding_14m	Dietary
1	2474.59	0.0163302	1.23025	0.118	11	14 months	Pets		furrypet_home_yn_14m	Environmental
1	2111.23	0.0139323	1.04961	0.3282	11	14 months	Intrapartum antibiotics		mat_AB_use_final_delivery	Parental
1	2083.69	0.0137505	1.03591	0.3519	11	14 months	Antepartum antibiotics		mat_AB_use_final_preg	Parental
1	2124.49	0.0140198	1.0562	0.331	11	14 months	Maternal weight gain		mat_weightgain	Parental
1	2402.84	0.0158567	1.19458	0.1463	11	14 months	Older siblings		older_siblings	Environmental
1	3154.73	0.0208185	1.56839	0.0157	11	14 months	Gestational age	*	pregn_weeks	Perinatal
1	2225.8	0.0146883	1.10656	0.2397	11	14 months	Prenatal smoking		smoke_before_preg	Parental
1	3302.77	0.0217955	1.64199	0.0112	11	14 months	Siblings in cohort	*	twins.siblings_in_lucki	Environmental
3	7758.88	0.0512019	1.28579	0.0207	11	14 months	Sequencing batch	*	bioinfo_batch	Technical variable
1	2692.08	0.0177654	1.33755	0.0573	12	14 months	Father's atopy		atopy_father	Parental
1	2765.84	0.0182522	1.3742	0.0488	12	14 months	Daycare	*	daycare_14m	Environmental
1	2441.12	0.0161093	1.21286	0.1244	12	14 months	Formulafeeding		formulafeeding_14m	Dietary
1	2474.45	0.0163292	1.22942	0.1189	12	14 months	Pets		furrypet_home_yn_14m	Environmental
1	2175.66	0.0143575	1.08097	0.2719	12	14 months	Intrapartum antibiotics		mat_AB_use_final_delivery	Parental
1	2107.6	0.0139083	1.04715	0.3495	12	14 months	Maternal weight gain		mat_weightgain	Parental
1	2395.04	0.0158052	1.18997	0.1498	12	14 months	Older siblings		older_siblings	Environmental
1	3031.85	0.0200076	1.50636	0.023	12	14 months	Gestational age	*	pregn_weeks	Perinatal
1	2307.24	0.0152258	1.14634	0.1878	12	14 months	Prenatal smoking		smoke_before_preg	Parental
1	3250.88	0.021453	1.61519	0.0125	12	14 months	Siblings in cohort	*	twins.siblings_in_lucki	Environmental
3	7862.66	0.0518868	1.30218	0.016	12	14 months	Sequencing batch	*	bioinfo_batch	Technical variable
1	2691.45	0.0177612	1.33617	0.0578	13	14 months	Father's atopy		atopy_father	Parental
1	2782.14	0.0183598	1.38119	0.046	13	14 months	Daycare	*	daycare_14m	Environmental
1	2454.37	0.0161967	1.21847	0.1206	13	14 months	Formulafeeding		formulafeeding_14m	Dietary
1	2572.43	0.0169758	1.27708	0.0872	13	14 months	Pets		furrypet_home_yn_14m	Environmental
1	2205.99	0.0145576	1.09516	0.2497	13	14 months	Intrapartum antibiotics		mat_AB_use_final_delivery	Parental
1	2680.13	0.0176865	1.33055	0.0645	13	14 months	Older siblings		older_siblings	Environmental
1	3196.16	0.0210919	1.58673	0.0146	13	14 months	Gestational age	*	pregn_weeks	Perinatal
1	2312.7	0.0152618	1.14814	0.1863	13	14 months	Prenatal smoking		smoke_before_preg	Parental
1	3362.22	0.0221877	1.66917	0.0088	13	14 months	Siblings in cohort	**	twins.siblings_in_lucki	Environmental
3	7922	0.0522784	1.31096	0.0138	13	14 months	Sequencing batch	*	bioinfo_batch	Technical variable
1	2689.34	0.0177473	1.33301	0.0584	14	14 months	Father's atopy		atopy_father	Parental
1	2836.04	0.0187154	1.40572	0.0419	14	14 months	Daycare	*	daycare_14m	Environmental
1	2404.72	0.0158691	1.19193	0.1427	14	14 months	Formulafeeding		formulafeeding_14m	Dietary
1	2586.28	0.0170672	1.28192	0.0846	14	14 months	Pets		furrypet_home_yn_14m	Environmental
1	2695.91	0.0177907	1.33627	0.0622	14	14 months	Older siblings		older_siblings	Environmental
1	3257.52	0.0214969	1.61464	0.0127	14	14 months	Gestational age	*	pregn_weeks	Perinatal
1	2344.01	0.0154685	1.16184	0.1718	14	14 months	Prenatal smoking		smoke_before_preg	Parental
1	3250.33	0.0214494	1.61107	0.0141	14	14 months	Siblings in cohort	*	twins.siblings_in_lucki	Environmental
3	7883.8	0.0520263	1.30257	0.0159	14	14 months	Sequencing batch	*	bioinfo_batch	Technical variable
Significant p values are denoted with stars: “***” indicates p-values < 0.001, “**” indicates p-values between 0.001 and 0.01, and “*” indicates p-values between 0.01 and 0.05.

## Sheet: Tbl7 - alpha diversity
Supplementary Table 7. Comparison of alpha diversity metrics between time points using Wilcoxon test.
P value	Z value	Age group1	Age group2	W value	Alternative	Method	Alpha diversity metrics	Q value	Q value significance
0.189	-1.314	1-2 weeks	4 weeks	871	two.sided	Wilcoxon signed rank test with continuity correction	ENS	0.252
0.048	-1.98	4 weeks	8 weeks	932	two.sided	Wilcoxon signed rank test with continuity correction	ENS	0.11
0.351	-0.932	8 weeks	4 months	1462	two.sided	Wilcoxon signed rank test with continuity correction	ENS	0.401
0.419	-0.807	4 months	5 months	1342	two.sided	Wilcoxon signed rank test with continuity correction	ENS	0.419
0.055	-1.919	5 months	6 months	886	two.sided	Wilcoxon signed rank test with continuity correction	ENS	0.11
0.001	-3.223	6 months	9 months	645	two.sided	Wilcoxon signed rank test with continuity correction	ENS	0.01	**
0.008	-2.669	9 months	11 months	786	two.sided	Wilcoxon signed rank test with continuity correction	ENS	0.03	*
0.081	-1.745	11 months	14 months	702	two.sided	Wilcoxon signed rank test with continuity correction	ENS	0.129
0.037	-2.089	1-2 weeks	4 weeks	702.5	two.sided	Wilcoxon signed rank test with continuity correction	Observed richness	0.049	*
0.036	-2.093	4 weeks	8 weeks	884.5	two.sided	Wilcoxon signed rank test with continuity correction	Observed richness	0.049	*
0.026	-2.229	8 weeks	4 months	1123.5	two.sided	Wilcoxon signed rank test with continuity correction	Observed richness	0.049	*
0.339	-0.956	4 months	5 months	1243.5	two.sided	Wilcoxon signed rank test with continuity correction	Observed richness	0.339
0.146	-1.453	5 months	6 months	964	two.sided	Wilcoxon signed rank test with continuity correction	Observed richness	0.167
0	-3.555	6 months	9 months	569.5	two.sided	Wilcoxon signed rank test with continuity correction	Observed richness	0.002	**
0	-4.143	9 months	11 months	475.5	two.sided	Wilcoxon signed rank test with continuity correction	Observed richness	0	***
0.001	-3.179	11 months	14 months	502.5	two.sided	Wilcoxon signed rank test with continuity correction	Observed richness	0.004	**
Adjusted significant p-values are represented with stars, where “***” indicates p-values < 0.001, “**” indicates p-values between 0.001 and 0.01, and “*” indicates p-values between 0.01 and 0.05.

## Sheet: Tbl8 - wilcox, beta diveristy
Supplementary Table 8. Wilcoxon signed-rank test between timepoints on Aitchison distances.
P-value	Z	Group1	Group2	W value	Alternative	Method	Q value	Q value significance
0.0985734	-1.65181	1-2 weeks vs 4 weeks	4 weeks vs 8 weeks	595	two.sided	Wilcoxon signed rank test with continuity correction	0.115002
0.00612345	-2.7411	4 weeks vs 8 weeks	8 weeks vs 4 months	481	two.sided	Wilcoxon signed rank test with continuity correction	0.010716	*
0.00379571	-2.89466	8 weeks vs 4 months	4 months vs 5 months	542	two.sided	Wilcoxon signed rank test with continuity correction	0.00885666	**
0.231595	-1.19626	4 months vs 5 months	5 months vs 6 months	752	two.sided	Wilcoxon signed rank test with continuity correction	0.231595
2.04323e-09	-5.99433	5 months vs 6 months	6 months vs 9 months	23	two.sided	Wilcoxon signed rank test with continuity correction	1.43026e-08	***
0.000612536	-3.426	6 months vs 9 months	9 months vs 11 months	1029	two.sided	Wilcoxon signed rank test with continuity correction	0.00214387	**
0.0600293	-1.88058	9 months vs 11 months	11 months vs 14 months	896	two.sided	Wilcoxon signed rank test with continuity correction	0.084041
Significant Q-values are denoted with stars: “***” indicates p-values < 0.001, “**” indicates p-values between 0.001 and 0.01, and “*” indicates p-values between 0.01 and 0.05.

## Sheet: Tbl9 - DMM
Supplementary Table 9. The relative abundance of bacterial species within each DMM cluster
Bacterial species	Cluster 1	Cluster 2	Cluster 3	Cluster 4	Cluster 5	Cluster 6	Cluster 7
Bifidobacterium longum	0.262572	0.226759	0.10932	0.230647	0.213747	0.131174	0.0532986
Bifidobacterium breve	0.173154	0.0586179	0.473051	0.103776	0.207391	0.135455	0.0350199
Bifidobacterium bifidum	0.094693	0.0518685	0.0940527	0.0792821	0.141435	0.0652635	0.0399294
Escherichia coli	0.158916	0.203885	0.0889456	0.0472687	0.110076	0.0558131	0.0131566
Bifidobacterium dentium	0.00483841	0.0433345	0.000342152	0.038164	0.0537532	0.0324891	0.000713895
Bifidobacterium kashiwanohense	0.0166122	8.8812e-06	0	0.00793584	0.033299	0.0597589	0.0514101
Klebsiella oxytoca	0.0052207	0.0579531	0.00809054	0.00541851	0.0251906	0.00110014	0.000304474
Bifidobacterium pseudocatenulatum	0.0175807	0	0.0353106	0.00719195	0.0211542	0.0150668	0.00528926
Ruminococcus gnavus	0.010379	0.027189	1.93929e-07	0.00805772	0.0197186	0.0263356	0.00657593
Klebsiella pneumoniae	0.019485	0.0466686	0	0.00137003	0.0147605	0.00913768	0.000936251
Bifidobacterium adolescentis	0.0288876	0.0190942	0.0145195	0.148482	0.0135022	0.0306462	0.030347
Akkermansia muciniphila	0.00110803	3.63603e-07	0	0.0140609	0.0130184	0.018773	0.0274356
Bacteroides vulgatus	0.0210731	0.00923774	0.0129927	0.0220811	0.012657	0.0244417	0.0332468
Veillonella parvula	0.00524256	0.0124436	0.000640567	0.00181323	0.0124938	0.00593784	0.00032124
Enterobacter cloacae complex	0.00624617	0.000424856	2.11901e-07	0.00688701	0.0106702	0.000997908	0.00105607
Bacteroides uniformis	0.00884583	0.0505324	0.0367872	0.01879	0.00723497	0.0307261	0.0512259
Collinsella aerofaciens	0.0305695	0.0112429	0.00655808	0.0793861	0.00655806	0.0243278	0.0196963
Klebsiella variicola	0.0110141	0.0305106	0	0.000443703	0.00573905	0.00368909	0.000320881
Bacteroides fragilis	0.033734	0.0178465	0.0178392	0.0197442	0.00550011	0.0214438	0.00937351
Bacteroides dorei	0.0101987	0.0127104	0.00484114	0.0182726	0.0045171	0.0162791	0.014033
Citrobacter freundii	0.00122678	0.00159198	0	0.000677178	0.00431913	0.000308906	1.17386e-05
Flavonifractor plautii	0.00051374	0.000429748	0	0.00777221	0.00359696	0.0335759	0.0254097
Bifidobacterium animalis	0.00162258	0.00994387	0.00173738	7.01742e-05	0.00316627	0.000577031	0.000363117
Eggerthella lenta	0.00100742	0.000572005	8.90427e-05	0.00166438	0.0030428	0.00386228	0.00373804
Klebsiella michiganensis	0.00581562	0.0237761	0.0565151	0.00942459	0.00290446	0.00179135	0.000387699
Roseburia hominis	1.03938e-07	0	0	1.21917e-05	0.00282473	0.00442777	0.00838198
Veillonella sp CAG 933	0.00170276	0.000161441	0	0.00197746	0.00278295	0.00525996	0.00120278
Clostridium clostridioforme	0	0.00165748	0	0.00499472	0.00225221	0.0053952	0.00134777
Veillonella atypica	0.00188937	0.00486912	1.20374e-05	0.00381059	0.00218732	0.00249373	0.000139429
Klebsiella quasipneumoniae	0.00374838	0.00330292	0	0.000282668	0.00211641	0.00117625	9.15203e-05
Enterococcus faecalis	0.00284656	0.00186687	0.00143264	0.000774021	0.00210485	0.00050637	0.000151747
Blautia wexlerae	3.75744e-06	7.3668e-05	0	0.00127202	0.00188234	0.00788139	0.0153135
Erysipelatoclostridium ramosum	0.00086081	0.000152063	0	0.000361682	0.00182966	0.00601994	0.00042128
Lactobacillus rhamnosus	0.000870798	0.000393838	0.000656917	0.00108064	0.00169547	0.00083968	0.000102377
Bifidobacterium scardovii	0.00501489	0	0	0.00108083	0.0016279	0.00273994	5.14468e-05
Olsenella scatoligenes	3.19143e-05	0	0	4.01209e-05	0.00149063	2.09638e-05	5.48463e-06
Clostridium innocuum	8.5766e-05	4.92852e-07	0	0.000351977	0.00145523	0.00365264	0.00104532
Bacteroides ovatus	0.00497519	0.00179912	1.37088e-07	0.00589295	0.00141567	0.00847103	0.00860422
Clostridium bolteae	0.000266741	0	0	0.0013873	0.00132367	0.00480149	0.00278678
Parabacteroides distasonis	0.0133609	0.00814588	0	0.0226534	0.00130167	0.012563	0.00957329
Citrobacter youngae	0.000258826	0.000335063	0	0.000186671	0.00111766	0.000101522	4.5668e-06
Actinomyces urogenitalis	0.000669221	0.00370378	0	0.000229683	0.00110684	2.85818e-05	3.03029e-05
Faecalibacterium prausnitzii	2.10113e-05	3.23575e-06	3.90483e-05	0.00185485	0.00104827	0.0415296	0.206043
Fusicatenibacter saccharivorans	8.59923e-07	0	0	0.000393984	0.000970371	0.0063814	0.0177907
Haemophilus sp HMSC71H05	8.51306e-05	1.72269e-06	3.83785e-06	5.2043e-06	0.000928743	0.00016371	2.57545e-05
Lactobacillus fermentum	0.000446974	0.00155646	0	0.000861634	0.000774257	0.000577642	1.20867e-05
Veillonella dispar	0.000873055	6.84679e-06	2.30027e-06	0.000503373	0.000712467	0.000529797	0.000153615
Enterococcus avium	0.000196574	9.4417e-05	0	0.000149497	0.000703633	0.00033317	5.77743e-05
Veillonella seminalis	0.00179684	0.00118966	0	0.00206738	0.000674537	0.000829228	0.000559555
Bacteroides thetaiotaomicron	0.0102567	0.0199448	0	0.00903785	0.000663318	0.00880557	0.00936235
Megasphaera micronuciformis	4.52396e-06	0	0	0.000249973	0.000655448	0.00130915	0.000295227
Clostridium paraputrificum	0.000494107	0.000198028	2.62561e-06	3.632e-06	0.000646323	0.000141173	5.62597e-07
Roseburia inulinivorans	0.000322705	0	0	7.15214e-07	0.000619747	0.00616195	0.0113317
Streptococcus lutetiensis	0.000835032	7.96448e-05	0	0.000139054	0.000595433	0.000179118	9.56657e-06
Rothia mucilaginosa	0.000957342	0.000255328	3.80014e-05	0.000202368	0.000594159	0.000342743	0.000109568
Actinomyces radingae	0.000194069	0.000243824	0.000121555	7.00001e-05	0.000581186	3.06169e-05	1.25235e-07
Haemophilus parainfluenzae	0.000197903	0.00128161	9.18688e-05	0.000141857	0.000562643	0.000548976	0.00010198
Enterococcus casseliflavus	3.86679e-05	0	0	0.000130092	0.000545908	0.000514397	0.000116432
Eubacterium sp CAG 38	2.27372e-06	0	0	3.36973e-05	0.000524487	0.00238161	0.0011087
Streptococcus parasanguinis	0.000420771	0.000489455	0	0.000194269	0.000498168	0.000207354	0.000146989
Hungatella hathewayi	1.74462e-06	0	1.12708e-05	0.000768423	0.00048175	0.00453066	0.00321671
Roseburia faecis	1.88607e-06	7.67017e-05	0	0.00143295	0.00047483	0.0116988	0.0314295
Clostridium neonatale	0.000498141	0.00179657	0	2.88761e-06	0.000446984	4.9651e-05	0
Ruminococcus torques	6.54685e-05	0.000527989	0	0.000298026	0.00041551	0.00140867	0.00279417
Roseburia intestinalis	9.20481e-06	0	0	0.00102818	0.000387796	0.0118622	0.0170076
Actinomyces sp oral taxon 181	0.000234585	9.75041e-05	0	0.000139191	0.000381408	7.59264e-05	3.15756e-05
Clostridium perfringens	0.000420259	0.00633506	0.000273981	7.06633e-06	0.000361768	5.57183e-05	3.02394e-06
Veillonella infantium	0.000188315	8.72372e-07	0	0.000104633	0.000292537	0.000226894	7.2651e-05
Streptococcus salivarius	0.000781902	0.00107447	0.000373169	0.00032612	0.000261747	0.000690275	0.000382763
Megamonas funiformis	4.56938e-05	3.72536e-06	0	3.45591e-05	0.000232561	0.000199554	2.6607e-05
Gordonibacter pamelaeae	7.922e-05	4.16388e-05	7.86157e-06	0.00018663	0.000225263	0.000458247	0.000508574
Bacteroides massiliensis	0	0.000123617	0	0.000430868	0.00022515	0.000131654	0.000978365
Streptococcus mitis	0.000182145	0.000231572	4.01986e-05	5.14765e-05	0.000207046	4.05313e-05	2.99253e-05
Actinomyces sp ICM47	1.33468e-06	0	0	0.000159683	0.000198048	0.000365289	8.57215e-05
Clostridium bolteae CAG 59	0.000570394	0	0	0.000969571	0.000178277	0.00119594	0.000402608
Actinomyces turicensis	9.6071e-07	0	0	0.000300208	0.000164436	1.77151e-05	8.4246e-06
Enterococcus gallinarum	0.000356331	0	0	2.14598e-05	0.000149165	0.000107214	1.63845e-05
Clostridium citroniae	0.000618005	0	0	6.51999e-06	0.000148776	0.00252125	0.000399625
Dorea formicigenerans	0	0	0	4.90151e-05	0.000147866	0.00027804	0.00145414
Clostridium symbiosum	9.47942e-05	0.00260888	0	2.0075e-06	0.0001436	0.00436065	0.00334709
Clostridium sp CAG 58	0	0	0	0	0.000138889	0.000120537	0.000226969
Prevotella copri	0.0010889	1.07945e-06	1.18375e-06	0.0162227	0.000138597	0.0130229	0.0564263
Bacteroides caccae	0.00129098	0.00223352	0	0.00414535	0.000135147	0.00311217	0.00500839
Parabacteroides merdae	0.000180591	0	0	0.00933739	0.000134832	0.00280262	0.00382397
Actinomyces sp HPA0247	2.64434e-05	0	0	2.32843e-05	0.000109423	3.94435e-05	2.44921e-06
Bacteroides stercoris	0.00134364	0	1.28954e-06	0.00107066	0.000103324	0.00396009	0.00927179
Varibaculum cambriense	2.41255e-06	2.24245e-06	3.75056e-05	0.000343314	9.36922e-05	1.35298e-05	2.12626e-06
Cutibacterium avidum	0.000912665	0.000211228	0.000410527	2.05285e-05	9.2035e-05	0	0
Actinomyces sp S6 Spd3	5.17305e-07	0	0	5.08121e-05	9.15256e-05	5.32079e-05	1.47815e-05
Actinomyces sp HMSC035G02	2.89152e-05	0	0	5.36679e-05	6.93337e-05	2.10532e-05	4.48017e-06
Ralstonia sp MD27	9.15739e-06	7.15069e-06	3.02062e-05	3.0969e-05	6.89881e-05	0.00011309	4.12112e-05
Bacteroides intestinalis	0	0	0	2.11223e-05	6.61787e-05	2.49311e-05	0.000803549
Actinomyces odontolyticus	2.97895e-05	0	9.00994e-06	7.69113e-05	6.45868e-05	3.83213e-05	1.17981e-05
Enterococcus faecium	3.93386e-05	0	0	2.2664e-06	6.44555e-05	3.57924e-05	2.52154e-06
Actinomyces graevenitzii	1.98005e-05	3.17213e-06	0	6.21586e-06	6.11771e-05	2.33748e-05	3.82105e-06
Intestinibacter bartlettii	1.45472e-06	0	0	2.76878e-05	5.59071e-05	0.00011078	9.89926e-05
Neisseria flavescens	1.02644e-05	0	4.93478e-06	1.40249e-05	5.3325e-05	3.2149e-05	1.14226e-05
Negativicoccus succinicivorans	3.42311e-05	3.58683e-06	2.31411e-06	0.000104579	5.22665e-05	1.18217e-07	8.51916e-08
Bacteroides xylanisolvens	0.000381855	2.79079e-06	0	0.000662347	4.8389e-05	0.00181196	0.00186705
Bifidobacterium catenulatum	6.62616e-05	0	1.51256e-06	0.0034843	4.4683e-05	0.000899183	0.00355775
Veillonella sp T11011 6	8.01639e-05	0	0	3.35513e-05	4.20838e-05	2.48606e-05	1.24862e-05
Blautia sp CAG 257	0	0	0	7.77022e-07	3.9401e-05	0.000216335	0.000245956
Bilophila wadsworthia	0.000128413	6.92613e-05	0	0.000298913	3.69258e-05	7.90649e-05	0.000342412
Prevotella timonensis	4.96018e-06	2.3527e-06	0	2.49533e-06	3.39331e-05	1.0391e-05	1.05501e-05
Blautia obeum	0	0	0	0	2.75694e-05	8.24661e-06	0.000829117
Stomatobaculum longum	5.64224e-07	0	0	7.16271e-06	2.51031e-05	2.32861e-06	1.16142e-07
Prevotella bivia	2.65206e-06	9.13222e-06	0	9.72881e-07	2.12635e-05	1.13186e-05	2.12321e-06
Corynebacterium argentoratense	5.58628e-07	0	0	1.79515e-05	2.06499e-05	2.42639e-05	8.25282e-06
Streptococcus australis	6.3673e-08	0	0	4.79792e-06	1.9075e-05	1.09697e-05	6.53779e-06
Phascolarctobacterium faecium	9.32374e-07	1.51941e-05	0	0.000291953	1.89567e-05	7.78192e-06	0.000222364
Streptococcus vestibularis	0.000242504	0.000270992	5.81038e-06	7.48067e-05	1.82165e-05	4.38171e-06	7.94436e-08
Corynebacterium pseudodiphtheriticum	4.68982e-05	2.21651e-05	1.64583e-05	2.04429e-05	1.51755e-05	5.2978e-06	9.06102e-07
Slackia isoflavoniconvertens	6.57621e-05	0	0	0.000728198	1.35895e-05	1.56513e-05	0.000416961
Streptococcus peroris	5.10903e-06	1.26679e-06	0	2.47163e-07	1.35036e-05	9.49903e-07	1.67274e-05
Anaerotruncus colihominis	0	0	0	7.26115e-06	1.31128e-05	0.000188207	0.000381503
Ruthenibacterium lactatiformans	0	0.00700191	0.0313017	0.00543092	1.30715e-05	0.00715939	0.0052585
Clostridioides difficile	3.32981e-08	0	0	2.41488e-05	1.16684e-05	3.87099e-05	1.68159e-06
Streptococcus sp A12	4.25409e-07	0	0	7.90211e-06	1.11064e-05	2.24348e-05	5.07146e-06
Staphylococcus aureus	3.62124e-05	6.05453e-05	0.000124145	1.21013e-06	1.08971e-05	4.18525e-06	2.59126e-07
Collinsella stercoris	9.42918e-05	1.02797e-05	1.62582e-05	0.000317678	9.73279e-06	7.10457e-05	9.73663e-05
Lactobacillus gasseri	0.000130389	1.51999e-05	0	9.49415e-05	9.47553e-06	1.07414e-05	0
Coprobacillus cateniformis	0.000328253	0	0	1.18088e-06	8.88177e-06	8.20096e-05	2.26495e-05
Streptococcus thermophilus	1.40536e-06	4.21375e-06	1.21501e-07	8.22751e-05	8.78998e-06	0.0017323	0.000433583
Anaerostipes hadrus	5.48468e-05	0	0	0.000310873	8.73843e-06	0.00198788	0.00552957
Lactobacillus paragasseri	0.000218313	1.75299e-05	1.5866e-06	0.000141103	7.54877e-06	1.63855e-06	0
Alistipes shahii	9.28909e-09	0.000328356	0	4.10042e-05	7.17691e-06	6.03094e-06	0.000851955
Streptococcus infantis	7.35587e-06	4.23287e-05	0	3.13864e-06	6.78616e-06	4.3042e-06	3.49123e-06
Eubacterium rectale	0.00026516	1.43525e-07	0	0.000238443	6.30162e-06	0.0134998	0.0358877
Corynebacterium accolens	3.74539e-05	1.04068e-05	2.58697e-05	1.45916e-05	6.01349e-06	6.55097e-07	0
Anaerostipes caccae	0	0	0	1.55459e-05	5.85464e-06	0.000162438	5.00084e-05
Veillonella rogosae	9.80292e-07	0	1.91902e-07	1.89048e-06	4.43797e-06	2.98204e-05	6.47981e-06
Lawsonella clevelandensis	1.0852e-06	0	0	8.20472e-06	4.27596e-06	9.23245e-06	2.58626e-05
Bacteroides plebeius	0.00138119	0	0	9.39858e-05	3.1399e-06	0.000119222	0.000910312
Scardovia wiggsiae	0.000581793	4.04541e-06	0	7.6577e-05	3.08549e-06	6.52551e-06	0
Bacteroides finegoldii	0	0	0	8.38989e-05	2.51795e-06	5.02914e-07	0.000817582
Staphylococcus hominis	0.000103955	5.68453e-05	5.40915e-05	2.49169e-06	2.39514e-06	1.11637e-07	0
Prevotella buccalis	2.74565e-06	0	0	2.56304e-07	2.09631e-06	3.52926e-06	8.42169e-06
Staphylococcus epidermidis	0.000303747	0.00023529	0.000336932	9.0906e-06	1.98399e-06	6.03314e-06	3.38932e-06
Bacteroides eggerthii	2.85847e-05	0	0.00182351	0.000172292	1.8485e-06	0.000207429	0.000943967
Roseburia sp CAG 471	0	0	0	0	1.63426e-06	6.24021e-08	8.34337e-05
Gemella haemolysans	1.0655e-05	4.59623e-06	8.8133e-07	3.38074e-07	1.61676e-06	3.64139e-06	2.18979e-07
Sellimonas intestinalis	3.74553e-07	0	0	0.00014515	1.6038e-06	0.000309355	0.000735891
Butyricimonas virosa	0	0	0	1.91537e-05	1.39456e-06	0	0.00010467
Haemophilus sputorum	0	0	0	2.63652e-06	1.0085e-06	8.30178e-05	1.15426e-05
Tyzzerella nexilis	6.61821e-06	0	0	9.4437e-05	1.00155e-06	0.000319344	0.000245939
Eubacterium eligens	0	0	0	0.000580469	7.99469e-07	0.00315733	0.00517508
Bacteroides clarus	6.16731e-05	0.00777554	0	3.29962e-05	6.20711e-07	0.000247197	0.000113966
Ruminococcus bromii	2.07179e-06	0	0	0.000122918	5.79645e-07	0.00252968	0.0100322
Sutterella parvirubra	5.41621e-07	0	0	8.34353e-06	5.30849e-07	4.07818e-06	1.62565e-05
Alistipes putredinis	1.00589e-06	0	0	0.000857368	4.97766e-07	0.00128503	0.00710195
Alistipes indistinctus	0	0	0	0.000268482	2.48834e-07	0	0.000287873
Alistipes finegoldii	1.01273e-06	1.44876e-05	0	0.00052916	2.03995e-07	0.00306756	0.0124124
Agathobaculum butyriciproducens	1.07218e-05	0	0	0	1.91883e-07	0.00107604	0.00417316
Eubacterium hallii	0	0	0	3.61629e-05	1.89228e-07	0.000201429	0.0013143
Dialister invisus	0	0	0	0	5.78838e-08	8.46768e-05	0.000707318
Eubacterium sp CAG 180	7.94628e-07	0	0	0.000572914	5.3334e-08	0.00090894	0.00317723
Turicibacter sanguinis	1.36913e-07	0	0	2.40243e-07	3.52295e-08	1.56639e-05	3.54014e-05
Eubacterium siraeum	4.12384e-08	0	0	0	1.26887e-08	0	0.0010704
Coprococcus eutactus	1.24077e-07	0	0	0	0	0.000331608	0.00343613
Firmicutes bacterium CAG 83	0	0	0	1.15129e-06	0	9.49893e-07	0.00338213
Alistipes inops	0	0	1.32054e-07	6.35627e-05	0	2.17265e-05	0.00248028
Eisenbergiella massiliensis	2.92177e-07	0	0	0	0	1.49129e-05	0.00221921
Firmicutes bacterium CAG 94	0	0	0	0	0	0.000106934	0.00219236
Ruminococcus bicirculans	3.7767e-08	0	0	2.62996e-05	0	0.000194403	0.00209967
Dorea longicatena	0	0	0	6.254e-05	0	0.000553152	0.00209534
Barnesiella intestinihominis	0	0	0	0.000494558	0	9.86976e-05	0.00185503
Lachnospira pectinoschiza	0	0	0	4.87384e-06	0	0.00261745	0.00146355
Ruminococcus lactaris	0	0	0	0	0	0.000738831	0.00120756
Gemmiger formicilis	1.6081e-07	0	5.56694e-07	3.46466e-07	0	0.000293913	0.0011719
Coprococcus comes	0	0	0	5.89559e-07	0	0.000113944	0.00106573
Parasutterella excrementihominis	0	0	0	9.86684e-05	0	0.000285709	0.00103203
Odoribacter splanchnicus	2.07117e-05	9.66712e-05	0	0.000261303	0	8.29635e-05	0.000919245
Intestinimonas butyriciproducens	0	0	0.00105279	3.14355e-05	0	8.17902e-05	0.000890431
Paraprevotella xylaniphila	0	0	0	3.72537e-06	0	1.91417e-06	0.000856397
Oscillibacter sp CAG 241	7.33762e-09	0	0	0	0	2.13926e-08	0.000711784
Eisenbergiella tayi	0	0	0	0	0	0.000371354	0.000701261
Bacteroides cellulosilyticus	0.00154552	6.6267e-05	0	0.000123027	0	5.88311e-05	0.000690865
Clostridium asparagiforme	0	0	0	0	0	1.9834e-05	0.000515581
Coprococcus catus	2.95643e-07	0	0	0	0	3.26425e-05	0.000515266
Anaeromassilibacillus sp An250	0	0	0	0	0	0.000576698	0.000427252
Oscillibacter sp 57 20	1.59747e-08	0	0	1.41402e-07	0	0	0.000373363
Clostridium saccharolyticum	0	0	0	3.7944e-05	0	0	0.000362646
Collinsella intestinalis	1.53908e-05	0	0	0.000163321	0	0.00017328	0.000334651
Eubacterium ramulus	0	0	0	0	0	2.07744e-05	0.000319706
Clostridium lavalense	0	0	0	0.00183902	0	4.42396e-05	0.000309507
Roseburia sp CAG 182	0	0	0	4.11278e-06	0	1.22727e-05	0.000283305
Desulfovibrio piger	0	0	0	0.000128542	0	3.68904e-06	0.000256348
Lawsonibacter asaccharolyticus	0	0	0	2.75052e-07	0	5.31219e-05	0.000234037
Asaccharobacter celatus	0	0	0	4.21217e-07	0	6.15104e-06	0.000226201
Firmicutes bacterium CAG 110	2.83034e-08	0	0	0	0	0	0.000201779
Adlercreutzia equolifaciens	0	0	0	1.84994e-08	0	3.25042e-06	0.00016999
Holdemania filiformis	0	0	0	0	0	1.72421e-05	0.000159237
Clostridium aldenense	0	0	0	1.15478e-05	0	0.00022783	0.000142877
Bacteroides salyersiae	0.000253778	0	0	0.0013095	0	0.000125451	0.000135173
Proteobacteria bacterium CAG 139	0	0	0	1.65878e-05	0	0.00022789	0.000122587
Firmicutes bacterium CAG 95	1.36604e-08	0	0	7.11479e-08	0	0	0.000112477
Holdemanella biformis	1.49277e-06	0	0	2.71636e-05	0	3.44132e-06	9.5857e-05
Pseudoflavonifractor sp An184	0	0	0	0	0	2.79029e-05	9.13826e-05
Ruminococcus callidus	0	0	0	0	0	3.15457e-08	7.70971e-05
Clostridium leptum	0	0	0	2.81457e-06	0	1.6357e-05	6.3559e-05
Ruminococcaceae bacterium D16	0	0	0	0	0	0.000142801	5.47587e-05
Firmicutes bacterium CAG 145	0	0	0	4.58083e-05	0	1.32058e-06	5.43847e-05
Clostridium spiroforme	0	0	0	6.12339e-07	0	0.000347453	5.08959e-05
Eubacterium ventriosum	0	0	0	0	0	1.8911e-07	4.84878e-05
Butyricimonas synergistica	0	0	0	0.000113743	0	0	4.34278e-05
Clostridium scindens	0	0	0	2.76087e-05	0	2.19261e-05	4.21484e-05
Lactobacillus rogosae	0	0	0	0	0	1.09526e-05	2.76739e-05
Coprobacter fastidiosus	3.15654e-06	3.34964e-05	0	1.51506e-05	0	7.18706e-06	1.71965e-05
Turicimonas muris	0	0	0	9.62717e-07	0	5.91993e-06	1.42e-05
Clostridium sp CAG 167	0	0	0	1.74105e-09	0	0	1.31135e-05
Collinsella massiliensis	9.33766e-07	0	1.28925e-07	1.37947e-05	0	9.17619e-07	9.12518e-06
Ruminococcaceae bacterium D5	0	0	0	0	0	0	8.68868e-06
Lachnoclostridium sp An138	0	0	0	2.23605e-06	0	8.73137e-07	2.1833e-06
Harryflintia acetispora	0	0	0	0	0	7.91871e-07	1.75665e-06
Enterorhabdus caecimuris	2.53142e-09	0	0	0	0	8.58165e-09	1.72604e-06
Enorma massiliensis	9.01608e-08	2.47424e-08	0	5.57738e-06	0	3.71909e-08	6.16765e-07

## Sheet: Tbl10 - LR-covid
Supplementary Table 10. Linear regression analysis of alpha diversity for each time point. Significant p-values are indicated with stars, where “*” indicates p-values < 0.05.
Run	Term	Estimate	Std.Error	T-value	P-value	CI Lower	CI Upper	Age	Variables	Significance	Exposure categories	Alpha diversity index
1	(Intercept)	3.97291	1.55338	2.5576	0.0129195	0.869682	7.07613	1 week	NA	*	NA	ENS
1	atopy_fatheryes	0.147035	0.461547	0.31857	0.75109	-0.77501	1.06908	1 week	Father's atopy		Parental	ENS
1	atopy_motheryes	-0.312672	0.483456	-0.646742	0.520112	-1.27849	0.653143	1 week	Mother's atopy		Parental	ENS
1	birthweight	-0.419929	0.304118	-1.38081	0.172141	-1.02748	0.187617	1 week	Birth weight		Perinatal	ENS
1	breastfeeding_1_2wyes	-0.980401	0.847969	-1.15618	0.251907	-2.67441	0.713611	1 week	Breastfeeding		Dietary	ENS
1	covid_270220yes	-0.474701	0.520535	-0.911949	0.365218	-1.51459	0.565187	1 week	Collected during pandemic		Environmental	ENS
1	delivery_placehospital	0.785049	0.696858	1.12656	0.264137	-0.607084	2.17718	1 week	Delivery place		Perinatal	ENS
1	delivery_typevaginal	0.28206	0.780836	0.361228	0.719119	-1.27784	1.84196	1 week	Delivery type		Perinatal	ENS
1	formulafeeding_1_2wyes	0.472088	0.559786	0.843337	0.402181	-0.646213	1.59039	1 week	Formulafeeding		Dietary	ENS
1	furrypet_home_yn_6myes	-0.355351	0.494197	-0.719048	0.474729	-1.34262	0.63192	1 week	Pets		Environmental	ENS
1	hospitalyes	-0.141718	0.491701	-0.288219	0.77411	-1.124	0.840568	1 week	Hospitalisation		Perinatal	ENS
1	mat_AB_use_final_deliveryyes	-0.501915	0.774741	-0.647849	0.5194	-2.04964	1.04581	1 week	Intrapartum antibiotics		Parental	ENS
1	mat_AB_use_final_pregyes	0.633414	0.733016	0.86412	0.390749	-0.830954	2.09778	1 week	Antepartum antibiotics		Parental	ENS
1	mat_weightgain	0.0496922	0.222138	0.223699	0.823704	-0.39408	0.493464	1 week	Maternal weight gain		Parental	ENS
1	older_siblingsyes	-0.554794	0.502682	-1.10367	0.27387	-1.55902	0.449429	1 week	Older siblings		Environmental	ENS
1	pregn_weeks	0.323977	0.307117	1.0549	0.295437	-0.289558	0.937513	1 week	Gestational age		Perinatal	ENS
1	sexmale	0.0826319	0.464118	0.178041	0.859253	-0.84455	1.00981	1 week	Sex		Perinatal	ENS
1	smoke_before_pregyes	-0.783628	0.591756	-1.32424	0.190133	-1.9658	0.39854	1 week	Prenatal smoking		Parental	ENS
1	twins.siblings_in_luckiyes	0.00391505	0.674924	0.00580073	0.99539	-1.3444	1.35223	1 week	Siblings in cohort		Environmental	ENS
2	(Intercept)	3.97338	1.53926	2.58136	0.0121055	0.899269	7.04749	1 week	NA	*	NA	ENS
2	atopy_fatheryes	0.147565	0.448929	0.328704	0.743436	-0.749009	1.04414	1 week	Father's atopy		Parental	ENS
2	atopy_motheryes	-0.313197	0.471235	-0.66463	0.508639	-1.25432	0.627925	1 week	Mother's atopy		Parental	ENS
2	birthweight	-0.420106	0.300251	-1.39918	0.166512	-1.01975	0.179536	1 week	Birth weight		Perinatal	ENS
2	breastfeeding_1_2wyes	-0.980258	0.841064	-1.1655	0.248077	-2.65998	0.699464	1 week	Breastfeeding		Dietary	ENS
2	covid_270220yes	-0.474431	0.514449	-0.922213	0.359828	-1.50186	0.552994	1 week	Collected during pandemic		Environmental	ENS
2	delivery_placehospital	0.785102	0.691416	1.1355	0.260336	-0.595751	2.16596	1 week	Delivery place		Perinatal	ENS
2	delivery_typevaginal	0.281587	0.770569	0.365427	0.715979	-1.25735	1.82052	1 week	Delivery type		Perinatal	ENS
2	formulafeeding_1_2wyes	0.472487	0.551249	0.857121	0.394527	-0.628433	1.57341	1 week	Formulafeeding		Dietary	ENS
2	furrypet_home_yn_6myes	-0.355449	0.490091	-0.725272	0.470888	-1.33423	0.62333	1 week	Pets		Environmental	ENS
2	hospitalyes	-0.141154	0.478283	-0.295127	0.768838	-1.09635	0.814042	1 week	Hospitalisation		Perinatal	ENS
2	mat_AB_use_final_deliveryyes	-0.501247	0.760223	-0.659343	0.512005	-2.01952	1.01702	1 week	Intrapartum antibiotics		Parental	ENS
2	mat_AB_use_final_pregyes	0.632423	0.707302	0.894134	0.374549	-0.780157	2.045	1 week	Antepartum antibiotics		Parental	ENS
2	mat_weightgain	0.0495585	0.219233	0.226054	0.821869	-0.38828	0.487397	1 week	Maternal weight gain		Parental	ENS
2	older_siblingsyes	-0.554488	0.496054	-1.1178	0.267768	-1.54518	0.4362	1 week	Older siblings		Environmental	ENS
2	pregn_weeks	0.323656	0.299757	1.07973	0.284254	-0.275001	0.922313	1 week	Gestational age		Perinatal	ENS
2	sexmale	0.0827294	0.460232	0.179756	0.857904	-0.836418	1.00188	1 week	Sex		Perinatal	ENS
2	smoke_before_pregyes	-0.783976	0.584153	-1.34207	0.184242	-1.95061	0.382659	1 week	Prenatal smoking		Parental	ENS
3	(Intercept)	4.04357	1.47795	2.73592	0.00798265	1.09274	6.9944	1 week	NA	**	NA	ENS
3	atopy_fatheryes	0.147519	0.445626	0.331038	0.741664	-0.742202	1.03724	1 week	Father's atopy		Parental	ENS
3	atopy_motheryes	-0.303597	0.464754	-0.653242	0.51587	-1.23151	0.624315	1 week	Mother's atopy		Parental	ENS
3	birthweight	-0.412633	0.295171	-1.39795	0.16681	-1.00196	0.176695	1 week	Birth weight		Perinatal	ENS
3	breastfeeding_1_2wyes	-1.00825	0.820438	-1.22892	0.223466	-2.64631	0.629805	1 week	Breastfeeding		Dietary	ENS
3	covid_270220yes	-0.47191	0.510474	-0.924455	0.358617	-1.4911	0.547284	1 week	Collected during pandemic		Environmental	ENS
3	delivery_placehospital	0.797847	0.682711	1.16865	0.24675	-0.565229	2.16092	1 week	Delivery place		Perinatal	ENS
3	delivery_typevaginal	0.277174	0.764511	0.36255	0.718099	-1.24922	1.80357	1 week	Delivery type		Perinatal	ENS
3	formulafeeding_1_2wyes	0.45355	0.537107	0.844431	0.401479	-0.618819	1.52592	1 week	Formulafeeding		Dietary	ENS
3	furrypet_home_yn_6myes	-0.357834	0.486307	-0.735819	0.464448	-1.32878	0.613109	1 week	Pets		Environmental	ENS
3	hospitalyes	-0.131635	0.471844	-0.278979	0.781133	-1.0737	0.810433	1 week	Hospitalisation		Perinatal	ENS
3	mat_AB_use_final_deliveryyes	-0.507071	0.753943	-0.672559	0.503576	-2.01237	0.998225	1 week	Intrapartum antibiotics		Parental	ENS
3	mat_AB_use_final_pregyes	0.627693	0.701612	0.894644	0.374228	-0.77312	2.02851	1 week	Antepartum antibiotics		Parental	ENS
3	mat_weightgain	0.0429404	0.214529	0.200161	0.84197	-0.385381	0.471261	1 week	Maternal weight gain		Parental	ENS
3	older_siblingsyes	-0.558424	0.491924	-1.13518	0.260404	-1.54058	0.423734	1 week	Older siblings		Environmental	ENS
3	pregn_weeks	0.318516	0.296195	1.07536	0.286129	-0.272856	0.909889	1 week	Gestational age		Perinatal	ENS
3	smoke_before_pregyes	-0.788109	0.579406	-1.3602	0.178394	-1.94493	0.368712	1 week	Prenatal smoking		Parental	ENS
4	(Intercept)	4.07171	1.46067	2.78756	0.00690396	1.15619	6.98723	1 week	NA	**	NA	ENS
4	atopy_fatheryes	0.139875	0.440794	0.317324	0.751985	-0.739954	1.0197	1 week	Father's atopy		Parental	ENS
4	atopy_motheryes	-0.281551	0.448268	-0.628085	0.532083	-1.1763	0.613197	1 week	Mother's atopy		Parental	ENS
4	birthweight	-0.405191	0.290715	-1.39378	0.167991	-0.98546	0.175078	1 week	Birth weight		Perinatal	ENS
4	breastfeeding_1_2wyes	-1.01901	0.81279	-1.25372	0.214301	-2.64135	0.603324	1 week	Breastfeeding		Dietary	ENS
4	covid_270220yes	-0.468801	0.506569	-0.925442	0.358057	-1.47992	0.542316	1 week	Collected during pandemic		Environmental	ENS
4	delivery_placehospital	0.789642	0.67658	1.16711	0.247303	-0.560816	2.1401	1 week	Delivery place		Perinatal	ENS
4	delivery_typevaginal	0.239194	0.735266	0.325317	0.745955	-1.2284	1.70679	1 week	Delivery type		Perinatal	ENS
4	formulafeeding_1_2wyes	0.432838	0.523256	0.827201	0.41106	-0.611586	1.47726	1 week	Formulafeeding		Dietary	ENS
4	furrypet_home_yn_6myes	-0.337717	0.472387	-0.714915	0.477145	-1.2806	0.605172	1 week	Pets		Environmental	ENS
4	hospitalyes	-0.117914	0.463482	-0.254408	0.799959	-1.04303	0.8072	1 week	Hospitalisation		Perinatal	ENS
4	mat_AB_use_final_deliveryyes	-0.517063	0.74688	-0.692297	0.491143	-2.00784	0.973716	1 week	Intrapartum antibiotics		Parental	ENS
4	mat_AB_use_final_pregyes	0.625179	0.696456	0.897658	0.372582	-0.764953	2.01531	1 week	Antepartum antibiotics		Parental	ENS
4	older_siblingsyes	-0.539691	0.479466	-1.12561	0.264348	-1.49671	0.417328	1 week	Older siblings		Environmental	ENS
4	pregn_weeks	0.32582	0.291826	1.11649	0.268202	-0.256667	0.908306	1 week	Gestational age		Perinatal	ENS
4	smoke_before_pregyes	-0.789466	0.575201	-1.37251	0.174484	-1.93757	0.35864	1 week	Prenatal smoking		Parental	ENS
5	(Intercept)	3.95373	1.37554	2.87431	0.00539959	1.20888	6.69857	1 week	NA	**	NA	ENS
5	atopy_fatheryes	0.152374	0.435025	0.350265	0.727223	-0.715705	1.02045	1 week	Father's atopy		Parental	ENS
5	atopy_motheryes	-0.295866	0.441654	-0.669905	0.505187	-1.17717	0.585441	1 week	Mother's atopy		Parental	ENS
5	birthweight	-0.397501	0.287144	-1.38433	0.170784	-0.970488	0.175485	1 week	Birth weight		Perinatal	ENS
5	breastfeeding_1_2wyes	-0.999769	0.803678	-1.24399	0.217774	-2.60348	0.603947	1 week	Breastfeeding		Dietary	ENS
5	covid_270220yes	-0.479088	0.501468	-0.955372	0.342774	-1.47975	0.521575	1 week	Collected during pandemic		Environmental	ENS
5	delivery_placehospital	0.800221	0.670641	1.19322	0.236931	-0.538022	2.13846	1 week	Delivery place		Perinatal	ENS
5	delivery_typevaginal	0.279075	0.713404	0.391187	0.696882	-1.1445	1.70265	1 week	Delivery type		Perinatal	ENS
5	formulafeeding_1_2wyes	0.452887	0.513718	0.881587	0.381106	-0.572221	1.478	1 week	Formulafeeding		Dietary	ENS
5	furrypet_home_yn_6myes	-0.34519	0.468219	-0.737241	0.463512	-1.27951	0.589126	1 week	Pets		Environmental	ENS
5	mat_AB_use_final_deliveryyes	-0.534581	0.738567	-0.723809	0.471666	-2.00837	0.939207	1 week	Intrapartum antibiotics		Parental	ENS
5	mat_AB_use_final_pregyes	0.629021	0.691487	0.909663	0.366213	-0.750821	2.00886	1 week	Antepartum antibiotics		Parental	ENS
5	older_siblingsyes	-0.517955	0.468537	-1.10547	0.272851	-1.45291	0.416997	1 week	Older siblings		Environmental	ENS
5	pregn_weeks	0.330496	0.289236	1.14265	0.257192	-0.246667	0.907658	1 week	Gestational age		Perinatal	ENS
5	smoke_before_pregyes	-0.784435	0.570894	-1.37405	0.173939	-1.92364	0.354766	1 week	Prenatal smoking		Parental	ENS
6	(Intercept)	4.09673	1.30517	3.13884	0.00249577	1.49298	6.70048	1 week	NA	**	NA	ENS
6	atopy_motheryes	-0.307823	0.437524	-0.703556	0.484076	-1.18066	0.565014	1 week	Mother's atopy		Parental	ENS
6	birthweight	-0.391388	0.284785	-1.37433	0.173788	-0.959518	0.176743	1 week	Birth weight		Perinatal	ENS
6	breastfeeding_1_2wyes	-1.01955	0.796578	-1.27991	0.204862	-2.60868	0.569579	1 week	Breastfeeding		Dietary	ENS
6	covid_270220yes	-0.491521	0.49702	-0.988935	0.32615	-1.48305	0.500007	1 week	Collected during pandemic		Environmental	ENS
6	delivery_placehospital	0.74301	0.646298	1.14964	0.254262	-0.54632	2.03234	1 week	Delivery place		Perinatal	ENS
6	delivery_typevaginal	0.308653	0.70387	0.438508	0.662388	-1.09553	1.71284	1 week	Delivery type		Perinatal	ENS
6	formulafeeding_1_2wyes	0.446027	0.510071	0.874443	0.384911	-0.571535	1.46359	1 week	Formulafeeding		Dietary	ENS
6	furrypet_home_yn_6myes	-0.346248	0.465223	-0.744262	0.459245	-1.27434	0.581847	1 week	Pets		Environmental	ENS
6	mat_AB_use_final_deliveryyes	-0.494601	0.72504	-0.682171	0.497415	-1.94102	0.951814	1 week	Intrapartum antibiotics		Parental	ENS
6	mat_AB_use_final_pregyes	0.64751	0.685072	0.945171	0.34787	-0.719172	2.01419	1 week	Antepartum antibiotics		Parental	ENS
6	older_siblingsyes	-0.54538	0.459003	-1.18818	0.238834	-1.46107	0.370305	1 week	Older siblings		Environmental	ENS
6	pregn_weeks	0.320127	0.285883	1.11978	0.266689	-0.250193	0.890447	1 week	Gestational age		Perinatal	ENS
6	smoke_before_pregyes	-0.770462	0.565866	-1.36156	0.177766	-1.89933	0.35841	1 week	Prenatal smoking		Parental	ENS
7	(Intercept)	4.37115	1.13873	3.83861	0.000268451	2.10002	6.64228	1 week	NA	***	NA	ENS
7	atopy_motheryes	-0.263255	0.423094	-0.622216	0.535822	-1.10709	0.580578	1 week	Mother's atopy		Parental	ENS
7	birthweight	-0.43381	0.2663	-1.62903	0.107799	-0.964928	0.097308	1 week	Birth weight		Perinatal	ENS
7	breastfeeding_1_2wyes	-1.02357	0.791917	-1.29252	0.200427	-2.603	0.555858	1 week	Breastfeeding		Dietary	ENS
7	covid_270220yes	-0.491968	0.494143	-0.995598	0.322875	-1.47751	0.493569	1 week	Collected during pandemic		Environmental	ENS
7	delivery_placehospital	0.732286	0.642098	1.14046	0.257983	-0.548339	2.01291	1 week	Delivery place		Perinatal	ENS
7	formulafeeding_1_2wyes	0.404981	0.498507	0.812388	0.419323	-0.58926	1.39922	1 week	Formulafeeding		Dietary	ENS
7	furrypet_home_yn_6myes	-0.371509	0.458972	-0.809438	0.421006	-1.2869	0.543881	1 week	Pets		Environmental	ENS
7	mat_AB_use_final_deliveryyes	-0.505311	0.720436	-0.701396	0.485381	-1.94217	0.931553	1 week	Intrapartum antibiotics		Parental	ENS
7	mat_AB_use_final_pregyes	0.664903	0.679966	0.977847	0.331517	-0.691247	2.02105	1 week	Antepartum antibiotics		Parental	ENS
7	older_siblingsyes	-0.517305	0.451886	-1.14477	0.256204	-1.41856	0.383953	1 week	Older siblings		Environmental	ENS
7	pregn_weeks	0.361748	0.268106	1.34927	0.181597	-0.172972	0.896468	1 week	Gestational age		Perinatal	ENS
7	smoke_before_pregyes	-0.797219	0.559312	-1.42536	0.158498	-1.91273	0.318293	1 week	Prenatal smoking		Parental	ENS
8	(Intercept)	4.23902	1.11392	3.8055	0.000297153	2.01793	6.46012	1 week	NA	***	NA	ENS
8	birthweight	-0.425565	0.264819	-1.607	0.112493	-0.9536	0.10247	1 week	Birth weight		Perinatal	ENS
8	breastfeeding_1_2wyes	-1.02558	0.788485	-1.30069	0.19757	-2.59777	0.546619	1 week	Breastfeeding		Dietary	ENS
8	covid_270220yes	-0.522278	0.489609	-1.06672	0.28971	-1.49853	0.453975	1 week	Collected during pandemic		Environmental	ENS
8	delivery_placehospital	0.688613	0.63549	1.08359	0.282211	-0.578518	1.95574	1 week	Delivery place		Perinatal	ENS
8	formulafeeding_1_2wyes	0.44652	0.49188	0.907783	0.367064	-0.53426	1.4273	1 week	Formulafeeding		Dietary	ENS
8	furrypet_home_yn_6myes	-0.322473	0.450199	-0.71629	0.476162	-1.22015	0.575199	1 week	Pets		Environmental	ENS
8	mat_AB_use_final_deliveryyes	-0.540044	0.715163	-0.755134	0.452666	-1.96604	0.885951	1 week	Intrapartum antibiotics		Parental	ENS
8	mat_AB_use_final_pregyes	0.640611	0.675908	0.947779	0.346457	-0.707111	1.98833	1 week	Antepartum antibiotics		Parental	ENS
8	older_siblingsyes	-0.492963	0.448242	-1.09977	0.275148	-1.38673	0.400806	1 week	Older siblings		Environmental	ENS
8	pregn_weeks	0.357526	0.266861	1.33975	0.1846	-0.174579	0.889631	1 week	Gestational age		Perinatal	ENS
8	smoke_before_pregyes	-0.840766	0.552515	-1.52171	0.132524	-1.94245	0.260918	1 week	Prenatal smoking		Parental	ENS
9	(Intercept)	4.08881	1.0903	3.75018	0.000354314	1.91534	6.26227	1 week	NA	***	NA	ENS
9	birthweight	-0.399769	0.261471	-1.52892	0.130665	-0.921001	0.121464	1 week	Birth weight		Perinatal	ENS
9	breastfeeding_1_2wyes	-0.981156	0.78338	-1.25246	0.214454	-2.5428	0.580484	1 week	Breastfeeding		Dietary	ENS
9	covid_270220yes	-0.551429	0.486262	-1.13401	0.26055	-1.52078	0.417918	1 week	Collected during pandemic		Environmental	ENS
9	delivery_placehospital	0.669367	0.632771	1.05783	0.293667	-0.592039	1.93077	1 week	Delivery place		Perinatal	ENS
9	formulafeeding_1_2wyes	0.473557	0.488768	0.968879	0.335849	-0.500785	1.4479	1 week	Formulafeeding		Dietary	ENS
9	mat_AB_use_final_deliveryyes	-0.604981	0.706991	-0.855713	0.394995	-2.01434	0.80438	1 week	Intrapartum antibiotics		Parental	ENS
9	mat_AB_use_final_pregyes	0.609476	0.672224	0.906656	0.367613	-0.730579	1.94953	1 week	Antepartum antibiotics		Parental	ENS
9	older_siblingsyes	-0.417635	0.434255	-0.961728	0.339405	-1.28331	0.448036	1 week	Older siblings		Environmental	ENS
9	pregn_weeks	0.342316	0.265113	1.29121	0.200763	-0.186178	0.87081	1 week	Gestational age		Perinatal	ENS
9	smoke_before_pregyes	-0.938831	0.533471	-1.75985	0.0826803	-2.00229	0.124625	1 week	Prenatal smoking		Parental	ENS
10	(Intercept)	4.03211	1.08628	3.71184	0.000399151	1.86716	6.19707	1 week	NA	***	NA	ENS
10	birthweight	-0.431286	0.258388	-1.66914	0.099373	-0.946253	0.0836807	1 week	Birth weight		Perinatal	ENS
10	breastfeeding_1_2wyes	-0.942001	0.780607	-1.20675	0.231423	-2.49775	0.613747	1 week	Breastfeeding		Dietary	ENS
10	covid_270220yes	-0.519914	0.483976	-1.07426	0.286246	-1.48448	0.444648	1 week	Collected during pandemic		Environmental	ENS
10	delivery_placehospital	0.645254	0.630983	1.02262	0.309866	-0.612293	1.9028	1 week	Delivery place		Perinatal	ENS
10	formulafeeding_1_2wyes	0.432927	0.485564	0.891597	0.375539	-0.5348	1.40065	1 week	Formulafeeding		Dietary	ENS
10	mat_AB_use_final_pregyes	0.53066	0.664662	0.798391	0.427234	-0.79401	1.85533	1 week	Antepartum antibiotics		Parental	ENS
10	older_siblingsyes	-0.422061	0.433427	-0.973777	0.333383	-1.28588	0.441758	1 week	Older siblings		Environmental	ENS
10	pregn_weeks	0.369169	0.262766	1.40493	0.164282	-0.154523	0.892862	1 week	Gestational age		Perinatal	ENS
10	smoke_before_pregyes	-0.911921	0.531566	-1.71554	0.0904889	-1.97133	0.147489	1 week	Prenatal smoking		Parental	ENS
11	(Intercept)	3.95297	1.0791	3.66322	0.000465212	1.80282	6.10312	1 week	NA	***	NA	ENS
11	birthweight	-0.43407	0.257731	-1.6842	0.0963574	-0.94761	0.0794705	1 week	Birth weight		Perinatal	ENS
11	breastfeeding_1_2wyes	-0.922542	0.778313	-1.18531	0.239687	-2.47336	0.62828	1 week	Breastfeeding		Dietary	ENS
11	covid_270220yes	-0.380974	0.450498	-0.845673	0.400461	-1.27861	0.516663	1 week	Collected during pandemic		Environmental	ENS
11	delivery_placehospital	0.725385	0.621422	1.1673	0.246838	-0.512826	1.96359	1 week	Delivery place		Perinatal	ENS
11	formulafeeding_1_2wyes	0.437507	0.484339	0.903307	0.369294	-0.527559	1.40257	1 week	Formulafeeding		Dietary	ENS
11	older_siblingsyes	-0.392815	0.430817	-0.911792	0.364839	-1.25124	0.465607	1 week	Older siblings		Environmental	ENS
11	pregn_weeks	0.369904	0.26212	1.4112	0.162376	-0.152381	0.89219	1 week	Gestational age		Perinatal	ENS
11	smoke_before_pregyes	-0.899347	0.53003	-1.69679	0.09394	-1.95545	0.15676	1 week	Prenatal smoking		Parental	ENS
12	(Intercept)	3.82185	1.06587	3.58566	0.000595869	1.69853	5.94517	1 week	NA	***	NA	ENS
12	birthweight	-0.451702	0.256398	-1.76172	0.0821911	-0.962473	0.0590685	1 week	Birth weight		Perinatal	ENS
12	breastfeeding_1_2wyes	-0.929993	0.776784	-1.19724	0.234985	-2.47743	0.617439	1 week	Breastfeeding		Dietary	ENS
12	delivery_placehospital	0.731566	0.620198	1.17957	0.2419	-0.503931	1.96706	1 week	Delivery place		Perinatal	ENS
12	formulafeeding_1_2wyes	0.453996	0.483026	0.939899	0.350287	-0.508242	1.41623	1 week	Formulafeeding		Dietary	ENS
12	older_siblingsyes	-0.359774	0.428226	-0.840149	0.403495	-1.21284	0.493297	1 week	Older siblings		Environmental	ENS
12	pregn_weeks	0.386263	0.260909	1.48045	0.142941	-0.133494	0.90602	1 week	Gestational age		Perinatal	ENS
12	smoke_before_pregyes	-0.867077	0.527649	-1.64328	0.104511	-1.91821	0.184055	1 week	Prenatal smoking		Parental	ENS
13	(Intercept)	3.38161	0.926376	3.65037	0.00047831	1.53657	5.22665	1 week	NA	***	NA	ENS
13	birthweight	-0.457493	0.255809	-1.78842	0.077694	-0.96698	0.0519945	1 week	Birth weight		Perinatal	ENS
13	breastfeeding_1_2wyes	-0.719785	0.73396	-0.980686	0.329859	-2.18159	0.742024	1 week	Breastfeeding		Dietary	ENS
13	delivery_placehospital	0.804205	0.612952	1.31202	0.193463	-0.416595	2.025	1 week	Delivery place		Perinatal	ENS
13	formulafeeding_1_2wyes	0.545676	0.469627	1.16194	0.248897	-0.389666	1.48102	1 week	Formulafeeding		Dietary	ENS
13	pregn_weeks	0.406596	0.25928	1.56817	0.120996	-0.109806	0.922998	1 week	Gestational age		Perinatal	ENS
13	smoke_before_pregyes	-0.941166	0.51922	-1.81265	0.0738344	-1.97528	0.0929505	1 week	Prenatal smoking		Parental	ENS
14	(Intercept)	2.65635	0.557747	4.76263	8.80568e-06	1.54573	3.76696	1 week	NA	***	NA	ENS
14	birthweight	-0.427364	0.253894	-1.68324	0.09638	-0.932932	0.0782041	1 week	Birth weight		Perinatal	ENS
14	delivery_placehospital	0.825989	0.612397	1.34878	0.181361	-0.39345	2.04543	1 week	Delivery place		Perinatal	ENS
14	formulafeeding_1_2wyes	0.746663	0.422443	1.76749	0.0811085	-0.0945287	1.58786	1 week	Formulafeeding		Dietary	ENS
14	pregn_weeks	0.423399	0.258649	1.63696	0.105719	-0.0916376	0.938436	1 week	Gestational age		Perinatal	ENS
14	smoke_before_pregyes	-1.02082	0.512701	-1.99106	0.0500221	-2.04174	0.000101083	1 week	Prenatal smoking		Parental	ENS
1	(Intercept)	1.46639	1.00863	1.45385	0.151033	-0.549829	3.4826	4 weeks	NA		NA	ENS
1	atopy_fatheryes	-0.358464	0.326401	-1.09823	0.276351	-1.01093	0.294003	4 weeks	Father's atopy		Parental	ENS
1	atopy_motheryes	-1.03346	0.352519	-2.93163	0.00471738	-1.73813	-0.32878	4 weeks	Mother's atopy	**	Parental	ENS
1	birthweight	-7.77421e-05	0.208258	-0.000373296	0.999703	-0.41638	0.416225	4 weeks	Birth weight		Perinatal	ENS
1	breastfeeding_4wyes	1.10182	0.557149	1.9776	0.0524234	-0.011907	2.21554	4 weeks	Breastfeeding		Dietary	ENS
1	covid_270220yes	-0.0563927	0.386766	-0.145806	0.884548	-0.829528	0.716742	4 weeks	Collected during pandemic		Environmental	ENS
1	delivery_placehospital	-0.424332	0.529232	-0.801789	0.425737	-1.48225	0.633587	4 weeks	Delivery place		Perinatal	ENS
1	delivery_typevaginal	1.91058	0.622979	3.06685	0.00320408	0.665264	3.1559	4 weeks	Delivery type	**	Perinatal	ENS
1	formulafeeding_4wyes	2.3129	0.502028	4.60712	2.0839e-05	1.30936	3.31644	4 weeks	Formulafeeding	***	Dietary	ENS
1	furrypet_home_yn_6myes	-0.214985	0.354362	-0.606683	0.546276	-0.923344	0.493374	4 weeks	Pets		Environmental	ENS
1	hospitalyes	0.272302	0.36649	0.742999	0.460288	-0.460301	1.0049	4 weeks	Hospitalisation		Perinatal	ENS
1	mat_AB_use_final_deliveryyes	0.714564	0.580119	1.23176	0.222692	-0.445076	1.87421	4 weeks	Intrapartum antibiotics		Parental	ENS
1	mat_AB_use_final_pregyes	-0.337246	0.477504	-0.706268	0.482667	-1.29176	0.617271	4 weeks	Antepartum antibiotics		Parental	ENS
1	mat_weightgain	0.20126	0.157809	1.27534	0.206947	-0.114195	0.516715	4 weeks	Maternal weight gain		Parental	ENS
1	older_siblingsyes	0.244392	0.342226	0.714123	0.477831	-0.439709	0.928493	4 weeks	Older siblings		Environmental	ENS
1	pregn_weeks	0.232557	0.218771	1.06302	0.291896	-0.204759	0.669873	4 weeks	Gestational age		Perinatal	ENS
1	sexmale	-0.340427	0.345731	-0.984658	0.328619	-1.03153	0.350679	4 weeks	Sex		Perinatal	ENS
1	smoke_before_pregyes	-1.20099	0.498213	-2.4106	0.0189051	-2.1969	-0.205076	4 weeks	Prenatal smoking	*	Parental	ENS
1	twins.siblings_in_luckiyes	0.72046	0.445149	1.61847	0.110638	-0.16938	1.6103	4 weeks	Siblings in cohort		Environmental	ENS
2	(Intercept)	1.46636	0.997826	1.46955	0.146659	-0.527636	3.46036	4 weeks	NA		NA	ENS
2	atopy_fatheryes	-0.35846	0.323633	-1.10761	0.272241	-1.00519	0.288269	4 weeks	Father's atopy		Parental	ENS
2	atopy_motheryes	-1.03345	0.349604	-2.95606	0.00438013	-1.73208	-0.334824	4 weeks	Mother's atopy	**	Parental	ENS
2	breastfeeding_4wyes	1.10183	0.552355	1.99478	0.0503976	-0.00196824	2.20562	4 weeks	Breastfeeding		Dietary	ENS
2	covid_270220yes	-0.0564199	0.376813	-0.149729	0.881457	-0.809421	0.696581	4 weeks	Collected during pandemic		Environmental	ENS
2	delivery_placehospital	-0.424369	0.516013	-0.822399	0.413952	-1.45554	0.606801	4 weeks	Delivery place		Perinatal	ENS
2	delivery_typevaginal	1.91062	0.607587	3.14461	0.00253731	0.696458	3.12479	4 weeks	Delivery type	**	Perinatal	ENS
2	formulafeeding_4wyes	2.31294	0.487292	4.74651	1.23246e-05	1.33916	3.28672	4 weeks	Formulafeeding	***	Dietary	ENS
2	furrypet_home_yn_6myes	-0.21497	0.349155	-0.615687	0.540319	-0.9127	0.48276	4 weeks	Pets		Environmental	ENS
2	hospitalyes	0.272331	0.355119	0.766873	0.446022	-0.437318	0.98198	4 weeks	Hospitalisation		Perinatal	ENS
2	mat_AB_use_final_deliveryyes	0.714542	0.572477	1.24816	0.216592	-0.429462	1.85855	4 weeks	Intrapartum antibiotics		Parental	ENS
2	mat_AB_use_final_pregyes	-0.337219	0.46841	-0.719923	0.474235	-1.27326	0.598823	4 weeks	Antepartum antibiotics		Parental	ENS
2	mat_weightgain	0.201252	0.155286	1.29601	0.1997	-0.109062	0.511567	4 weeks	Maternal weight gain		Parental	ENS
2	older_siblingsyes	0.244399	0.33897	0.721004	0.473574	-0.432979	0.921776	4 weeks	Older siblings		Environmental	ENS
2	pregn_weeks	0.232507	0.171604	1.35491	0.180286	-0.110416	0.57543	4 weeks	Gestational age		Perinatal	ENS
2	sexmale	-0.340456	0.334021	-1.01927	0.311975	-1.00794	0.327031	4 weeks	Sex		Perinatal	ENS
2	smoke_before_pregyes	-1.201	0.494034	-2.431	0.0179148	-2.18824	-0.213748	4 weeks	Prenatal smoking	*	Parental	ENS
2	twins.siblings_in_luckiyes	0.720462	0.441583	1.63154	0.107765	-0.161971	1.60289	4 weeks	Siblings in cohort		Environmental	ENS
3	(Intercept)	1.4266	0.954467	1.49466	0.139919	-0.480168	3.33337	4 weeks	NA		NA	ENS
3	atopy_fatheryes	-0.360776	0.320785	-1.12467	0.264931	-1.00162	0.280066	4 weeks	Father's atopy		Parental	ENS
3	atopy_motheryes	-1.04116	0.343142	-3.0342	0.00348309	-1.72666	-0.355656	4 weeks	Mother's atopy	**	Parental	ENS
3	breastfeeding_4wyes	1.10695	0.54707	2.02341	0.0472114	0.0140486	2.19984	4 weeks	Breastfeeding	*	Dietary	ENS
3	delivery_placehospital	-0.416553	0.50943	-0.817684	0.416571	-1.43426	0.601151	4 weeks	Delivery place		Perinatal	ENS
3	delivery_typevaginal	1.92399	0.596382	3.22611	0.00197862	0.732584	3.1154	4 weeks	Delivery type	**	Perinatal	ENS
3	formulafeeding_4wyes	2.31658	0.482956	4.79667	1.0026e-05	1.35176	3.28139	4 weeks	Formulafeeding	***	Dietary	ENS
3	furrypet_home_yn_6myes	-0.210083	0.34496	-0.609005	0.544677	-0.89922	0.479055	4 weeks	Pets		Environmental	ENS
3	hospitalyes	0.267278	0.350801	0.761907	0.448914	-0.433529	0.968084	4 weeks	Hospitalisation		Perinatal	ENS
3	mat_AB_use_final_deliveryyes	0.716033	0.568002	1.26062	0.212023	-0.418681	1.85075	4 weeks	Intrapartum antibiotics		Parental	ENS
3	mat_AB_use_final_pregyes	-0.36045	0.438579	-0.821859	0.414208	-1.23661	0.515712	4 weeks	Antepartum antibiotics		Parental	ENS
3	mat_weightgain	0.201669	0.154071	1.30894	0.195236	-0.106123	0.509461	4 weeks	Maternal weight gain		Parental	ENS
3	older_siblingsyes	0.248977	0.335	0.743217	0.46007	-0.420261	0.918216	4 weeks	Older siblings		Environmental	ENS
3	pregn_weeks	0.233596	0.170135	1.373	0.174543	-0.106288	0.573481	4 weeks	Gestational age		Perinatal	ENS
3	sexmale	-0.338786	0.331275	-1.02267	0.310313	-1.00058	0.323012	4 weeks	Sex		Perinatal	ENS
3	smoke_before_pregyes	-1.18479	0.47833	-2.47692	0.0159047	-2.14036	-0.229212	4 weeks	Prenatal smoking	*	Parental	ENS
3	twins.siblings_in_luckiyes	0.728417	0.435013	1.67447	0.0989183	-0.140621	1.59746	4 weeks	Siblings in cohort		Environmental	ENS
4	(Intercept)	1.3768	0.946344	1.45486	0.15052	-0.513181	3.26678	4 weeks	NA		NA	ENS
4	atopy_fatheryes	-0.376609	0.318179	-1.18364	0.240867	-1.01206	0.258838	4 weeks	Father's atopy		Parental	ENS
4	atopy_motheryes	-1.02276	0.34015	-3.00678	0.00375087	-1.70208	-0.343429	4 weeks	Mother's atopy	**	Parental	ENS
4	breastfeeding_4wyes	1.11044	0.544386	2.03981	0.0454371	0.0232314	2.19766	4 weeks	Breastfeeding	*	Dietary	ENS
4	delivery_placehospital	-0.423622	0.506827	-0.83583	0.406312	-1.43583	0.588582	4 weeks	Delivery place		Perinatal	ENS
4	delivery_typevaginal	1.92949	0.593421	3.25147	0.0018214	0.744347	3.11463	4 weeks	Delivery type	**	Perinatal	ENS
4	formulafeeding_4wyes	2.30094	0.479933	4.79429	9.88344e-06	1.34245	3.25943	4 weeks	Formulafeeding	***	Dietary	ENS
4	hospitalyes	0.249437	0.34788	0.717021	0.47593	-0.445328	0.944202	4 weeks	Hospitalisation		Perinatal	ENS
4	mat_AB_use_final_deliveryyes	0.68573	0.563073	1.21783	0.22769	-0.438806	1.81026	4 weeks	Intrapartum antibiotics		Parental	ENS
4	mat_AB_use_final_pregyes	-0.402662	0.430966	-0.934325	0.353595	-1.26336	0.458037	4 weeks	Antepartum antibiotics		Parental	ENS
4	mat_weightgain	0.181817	0.149853	1.21331	0.229403	-0.117459	0.481094	4 weeks	Maternal weight gain		Parental	ENS
4	older_siblingsyes	0.265949	0.332219	0.800522	0.426325	-0.397538	0.929436	4 weeks	Older siblings		Environmental	ENS
4	pregn_weeks	0.242935	0.168621	1.44072	0.154465	-0.0938243	0.579694	4 weeks	Gestational age		Perinatal	ENS
4	sexmale	-0.343726	0.329569	-1.04295	0.300833	-1.00192	0.31447	4 weeks	Sex		Perinatal	ENS
4	smoke_before_pregyes	-1.19979	0.475378	-2.52387	0.0140599	-2.14919	-0.250398	4 weeks	Prenatal smoking	*	Parental	ENS
4	twins.siblings_in_luckiyes	0.71942	0.432653	1.66281	0.101166	-0.144648	1.58349	4 weeks	Siblings in cohort		Environmental	ENS
5	(Intercept)	1.59985	0.890459	1.79666	0.076966	-0.178009	3.37771	4 weeks	NA		NA	ENS
5	atopy_fatheryes	-0.403972	0.314717	-1.2836	0.203769	-1.03232	0.224381	4 weeks	Father's atopy		Parental	ENS
5	atopy_motheryes	-0.978505	0.333271	-2.93606	0.00457141	-1.6439	-0.313108	4 weeks	Mother's atopy	**	Parental	ENS
5	breastfeeding_4wyes	1.04561	0.534844	1.95498	0.0548226	-0.022241	2.11346	4 weeks	Breastfeeding		Dietary	ENS
5	delivery_placehospital	-0.410377	0.504623	-0.813236	0.419007	-1.41789	0.597135	4 weeks	Delivery place		Perinatal	ENS
5	delivery_typevaginal	1.83364	0.576035	3.1832	0.00222243	0.683547	2.98373	4 weeks	Delivery type	**	Perinatal	ENS
5	formulafeeding_4wyes	2.24415	0.471608	4.75851	1.10279e-05	1.30256	3.18575	4 weeks	Formulafeeding	***	Dietary	ENS
5	mat_AB_use_final_deliveryyes	0.666119	0.560335	1.18879	0.238783	-0.452626	1.78486	4 weeks	Intrapartum antibiotics		Parental	ENS
5	mat_AB_use_final_pregyes	-0.401716	0.429375	-0.935584	0.352898	-1.25899	0.455558	4 weeks	Antepartum antibiotics		Parental	ENS
5	mat_weightgain	0.192094	0.148616	1.29255	0.200672	-0.104627	0.488814	4 weeks	Maternal weight gain		Parental	ENS
5	older_siblingsyes	0.228552	0.326889	0.699171	0.486902	-0.424104	0.881207	4 weeks	Older siblings		Environmental	ENS
5	pregn_weeks	0.228497	0.166797	1.36991	0.175357	-0.104524	0.561518	4 weeks	Gestational age		Perinatal	ENS
5	sexmale	-0.307451	0.324462	-0.947572	0.346804	-0.955261	0.340358	4 weeks	Sex		Perinatal	ENS
5	smoke_before_pregyes	-1.21225	0.473308	-2.56123	0.0127232	-2.15724	-0.267262	4 weeks	Prenatal smoking	*	Parental	ENS
5	twins.siblings_in_luckiyes	0.768065	0.425725	1.80413	0.0757733	-0.0819221	1.61805	4 weeks	Siblings in cohort		Environmental	ENS
6	(Intercept)	1.62929	0.886063	1.8388	0.0703765	-0.139295	3.39788	4 weeks	NA		NA	ENS
6	atopy_fatheryes	-0.423874	0.312229	-1.35757	0.179154	-1.04709	0.199338	4 weeks	Father's atopy		Parental	ENS
6	atopy_motheryes	-0.989799	0.331607	-2.98485	0.00395747	-1.65169	-0.327908	4 weeks	Mother's atopy	**	Parental	ENS
6	breastfeeding_4wyes	1.01721	0.531261	1.91471	0.0598007	-0.0431915	2.07761	4 weeks	Breastfeeding		Dietary	ENS
6	delivery_placehospital	-0.398863	0.502426	-0.793873	0.430072	-1.40171	0.603985	4 weeks	Delivery place		Perinatal	ENS
6	delivery_typevaginal	1.91861	0.560916	3.4205	0.0010688	0.799019	3.03821	4 weeks	Delivery type	**	Perinatal	ENS
6	formulafeeding_4wyes	2.2314	0.469454	4.75318	1.10095e-05	1.29437	3.16843	4 weeks	Formulafeeding	***	Dietary	ENS
6	mat_AB_use_final_deliveryyes	0.731542	0.550355	1.32922	0.188285	-0.366972	1.83005	4 weeks	Intrapartum antibiotics		Parental	ENS
6	mat_AB_use_final_pregyes	-0.40621	0.427686	-0.949787	0.345634	-1.25987	0.447454	4 weeks	Antepartum antibiotics		Parental	ENS
6	mat_weightgain	0.212411	0.14519	1.46299	0.148146	-0.0773891	0.502211	4 weeks	Maternal weight gain		Parental	ENS
6	pregn_weeks	0.219299	0.165642	1.32393	0.190024	-0.111323	0.549921	4 weeks	Gestational age		Perinatal	ENS
6	sexmale	-0.288013	0.322033	-0.894359	0.374331	-0.930795	0.354768	4 weeks	Sex		Perinatal	ENS
6	smoke_before_pregyes	-1.13502	0.45848	-2.47563	0.0158347	-2.05016	-0.219895	4 weeks	Prenatal smoking	*	Parental	ENS
6	twins.siblings_in_luckiyes	0.782524	0.423597	1.84733	0.0691148	-0.0629796	1.62803	4 weeks	Siblings in cohort		Environmental	ENS
7	(Intercept)	1.32075	0.79411	1.66319	0.100877	-0.263867	2.90538	4 weeks	NA		NA	ENS
7	atopy_fatheryes	-0.423292	0.311378	-1.35941	0.178507	-1.04464	0.198054	4 weeks	Father's atopy		Parental	ENS
7	atopy_motheryes	-0.984658	0.330641	-2.97803	0.00401793	-1.64444	-0.324874	4 weeks	Mother's atopy	**	Parental	ENS
7	breastfeeding_4wyes	0.963238	0.525458	1.83314	0.0711594	-0.0852977	2.01177	4 weeks	Breastfeeding		Dietary	ENS
7	delivery_typevaginal	1.93616	0.558955	3.4639	0.00092587	0.820785	3.05154	4 weeks	Delivery type	***	Perinatal	ENS
7	formulafeeding_4wyes	2.16046	0.459617	4.70057	1.31013e-05	1.24331	3.07761	4 weeks	Formulafeeding	***	Dietary	ENS
7	mat_AB_use_final_deliveryyes	0.675932	0.544393	1.24163	0.21864	-0.410387	1.76225	4 weeks	Intrapartum antibiotics		Parental	ENS
7	mat_AB_use_final_pregyes	-0.452369	0.422562	-1.07054	0.288162	-1.29558	0.39084	4 weeks	Antepartum antibiotics		Parental	ENS
7	mat_weightgain	0.207145	0.144643	1.43211	0.156694	-0.0814864	0.495776	4 weeks	Maternal weight gain		Parental	ENS
7	pregn_weeks	0.234327	0.164108	1.42788	0.157904	-0.0931464	0.5618	4 weeks	Gestational age		Perinatal	ENS
7	sexmale	-0.273369	0.320629	-0.852601	0.396874	-0.913174	0.366437	4 weeks	Sex		Perinatal	ENS
7	smoke_before_pregyes	-1.10353	0.455517	-2.4226	0.0180794	-2.01251	-0.194564	4 weeks	Prenatal smoking	*	Parental	ENS
7	twins.siblings_in_luckiyes	0.809991	0.421033	1.92382	0.0585639	-0.030166	1.65015	4 weeks	Siblings in cohort		Environmental	ENS
8	(Intercept)	1.18748	0.777031	1.52823	0.131028	-0.362655	2.73761	4 weeks	NA		NA	ENS
8	atopy_fatheryes	-0.439186	0.310204	-1.4158	0.161333	-1.05803	0.179654	4 weeks	Father's atopy		Parental	ENS
8	atopy_motheryes	-0.995143	0.329758	-3.0178	0.00356492	-1.65299	-0.337294	4 weeks	Mother's atopy	**	Parental	ENS
8	breastfeeding_4wyes	0.953544	0.524295	1.81872	0.0732943	-0.0923957	1.99948	4 weeks	Breastfeeding		Dietary	ENS
8	delivery_typevaginal	1.92761	0.557758	3.456	0.000942429	0.814914	3.04031	4 weeks	Delivery type	***	Perinatal	ENS
8	formulafeeding_4wyes	2.11418	0.455496	4.64149	1.5982e-05	1.20549	3.02287	4 weeks	Formulafeeding	***	Dietary	ENS
8	mat_AB_use_final_deliveryyes	0.644162	0.54204	1.1884	0.238749	-0.437179	1.7255	4 weeks	Intrapartum antibiotics		Parental	ENS
8	mat_AB_use_final_pregyes	-0.427035	0.420681	-1.0151	0.313602	-1.26627	0.4122	4 weeks	Antepartum antibiotics		Parental	ENS
8	mat_weightgain	0.20434	0.14432	1.41589	0.161307	-0.0835696	0.492249	4 weeks	Maternal weight gain		Parental	ENS
8	pregn_weeks	0.237589	0.163739	1.45102	0.151305	-0.0890616	0.564239	4 weeks	Gestational age		Perinatal	ENS
8	smoke_before_pregyes	-1.0401	0.448509	-2.31901	0.0233623	-1.93485	-0.145345	4 weeks	Prenatal smoking	*	Parental	ENS
8	twins.siblings_in_luckiyes	0.79225	0.419685	1.88773	0.0632687	-0.0449988	1.6295	4 weeks	Siblings in cohort		Environmental	ENS
9	(Intercept)	1.02891	0.761333	1.35146	0.180898	-0.489517	2.54735	4 weeks	NA		NA	ENS
9	atopy_fatheryes	-0.459309	0.309637	-1.48338	0.142463	-1.07686	0.158243	4 weeks	Father's atopy		Parental	ENS
9	atopy_motheryes	-1.04272	0.326481	-3.19383	0.0021052	-1.69387	-0.391579	4 weeks	Mother's atopy	**	Parental	ENS
9	breastfeeding_4wyes	1.04604	0.516428	2.02554	0.0466261	0.0160619	2.07603	4 weeks	Breastfeeding	*	Dietary	ENS
9	delivery_typevaginal	1.95489	0.557231	3.50821	0.000792743	0.843524	3.06625	4 weeks	Delivery type	***	Perinatal	ENS
9	formulafeeding_4wyes	2.14023	0.454872	4.70513	1.23924e-05	1.23302	3.04744	4 weeks	Formulafeeding	***	Dietary	ENS
9	mat_AB_use_final_deliveryyes	0.622141	0.541724	1.14845	0.254694	-0.458293	1.70257	4 weeks	Intrapartum antibiotics		Parental	ENS
9	mat_weightgain	0.216374	0.143863	1.50403	0.137072	-0.0705513	0.5033	4 weeks	Maternal weight gain		Parental	ENS
9	pregn_weeks	0.255979	0.162769	1.57265	0.120309	-0.0686537	0.580611	4 weeks	Gestational age		Perinatal	ENS
9	smoke_before_pregyes	-1.01911	0.44813	-2.27415	0.0260256	-1.91288	-0.125347	4 weeks	Prenatal smoking	*	Parental	ENS
9	twins.siblings_in_luckiyes	0.89137	0.408257	2.18336	0.0323641	0.0771285	1.70561	4 weeks	Siblings in cohort	*	Environmental	ENS
10	(Intercept)	1.30326	0.724508	1.79882	0.0762972	-0.141369	2.74789	4 weeks	NA		NA	ENS
10	atopy_fatheryes	-0.419558	0.308387	-1.36049	0.177977	-1.03446	0.195347	4 weeks	Father's atopy		Parental	ENS
10	atopy_motheryes	-0.977923	0.322289	-3.0343	0.00336724	-1.62055	-0.335297	4 weeks	Mother's atopy	**	Parental	ENS
10	breastfeeding_4wyes	0.930993	0.507754	1.83355	0.0709122	-0.0814403	1.94343	4 weeks	Breastfeeding		Dietary	ENS
10	delivery_typevaginal	1.78008	0.537241	3.31337	0.00145298	0.708848	2.85131	4 weeks	Delivery type	**	Perinatal	ENS
10	formulafeeding_4wyes	2.03423	0.446408	4.55688	2.10689e-05	1.14411	2.92434	4 weeks	Formulafeeding	***	Dietary	ENS
10	mat_weightgain	0.194214	0.142883	1.35925	0.178368	-0.0906862	0.479115	4 weeks	Maternal weight gain		Parental	ENS
10	pregn_weeks	0.261749	0.163056	1.60526	0.112875	-0.0633766	0.586874	4 weeks	Gestational age		Perinatal	ENS
10	smoke_before_pregyes	-1.02881	0.449056	-2.29104	0.0249322	-1.9242	-0.133414	4 weeks	Prenatal smoking	*	Parental	ENS
10	twins.siblings_in_luckiyes	0.956659	0.405186	2.36104	0.0209727	0.148741	1.76458	4 weeks	Siblings in cohort	*	Environmental	ENS
1	(Intercept)	4.2052	1.07073	3.92742	0.000174054	2.07631	6.3341	8 weeks	NA	***	NA	ENS
1	atopy_fatheryes	-0.900847	0.373581	-2.41138	0.0180459	-1.64363	-0.158067	8 weeks	Father's atopy	*	Parental	ENS
1	atopy_motheryes	-0.72778	0.396768	-1.83427	0.0701129	-1.51666	0.0611015	8 weeks	Mother's atopy		Parental	ENS
1	birthweight	0.0916361	0.246245	0.372134	0.710719	-0.397964	0.581236	8 weeks	Birth weight		Perinatal	ENS
1	breastfeeding_8wyes	-0.0526036	0.577364	-0.09111	0.92762	-1.20056	1.09535	8 weeks	Breastfeeding		Dietary	ENS
1	covid_270220yes	-0.0577046	0.415167	-0.138991	0.889786	-0.883167	0.767758	8 weeks	Collected during pandemic		Environmental	ENS
1	delivery_placehospital	-0.570348	0.575118	-0.991706	0.324156	-1.71384	0.573141	8 weeks	Delivery place		Perinatal	ENS
1	delivery_typevaginal	0.405363	0.592691	0.683936	0.495876	-0.773066	1.58379	8 weeks	Delivery type		Perinatal	ENS
1	formulafeeding_8wyes	0.94712	0.499663	1.89552	0.0614224	-0.0463437	1.94058	8 weeks	Formulafeeding		Dietary	ENS
1	furrypet_home_yn_6myes	-0.357518	0.399536	-0.894833	0.373403	-1.1519	0.436867	8 weeks	Pets		Environmental	ENS
1	hospitalyes	-0.125886	0.408116	-0.308458	0.758489	-0.93733	0.685557	8 weeks	Hospitalisation		Perinatal	ENS
1	mat_AB_use_final_deliveryyes	0.743544	0.675285	1.10108	0.27397	-0.599104	2.08619	8 weeks	Intrapartum antibiotics		Parental	ENS
1	mat_AB_use_final_pregyes	0.303105	0.539892	0.561419	0.575989	-0.770345	1.37656	8 weeks	Antepartum antibiotics		Parental	ENS
1	mat_weightgain	0.0786538	0.193646	0.406174	0.685636	-0.306366	0.463674	8 weeks	Maternal weight gain		Parental	ENS
1	older_siblingsyes	0.276807	0.408034	0.678392	0.499366	-0.534474	1.08809	8 weeks	Older siblings		Environmental	ENS
1	pregn_weeks	-0.0333712	0.252337	-0.132249	0.8951	-0.535084	0.468342	8 weeks	Gestational age		Perinatal	ENS
1	sexmale	0.302863	0.392927	0.770786	0.442971	-0.478382	1.08411	8 weeks	Sex		Perinatal	ENS
1	smoke_before_pregyes	0.206214	0.495934	0.41581	0.678597	-0.779836	1.19226	8 weeks	Prenatal smoking		Parental	ENS
1	twins.siblings_in_luckiyes	0.345097	0.50348	0.685422	0.494942	-0.655957	1.34615	8 weeks	Siblings in cohort		Environmental	ENS
2	(Intercept)	4.15021	0.879281	4.72001	9.06848e-06	2.40226	5.89816	8 weeks	NA	***	NA	ENS
2	atopy_fatheryes	-0.901015	0.371417	-2.42589	0.017361	-1.63937	-0.162663	8 weeks	Father's atopy	*	Parental	ENS
2	atopy_motheryes	-0.732593	0.390961	-1.87383	0.0643503	-1.5098	0.0446118	8 weeks	Mother's atopy		Parental	ENS
2	birthweight	0.0902239	0.244335	0.369263	0.71284	-0.395498	0.575946	8 weeks	Birth weight		Perinatal	ENS
2	covid_270220yes	-0.0560244	0.412359	-0.135863	0.892247	-0.875766	0.763717	8 weeks	Collected during pandemic		Environmental	ENS
2	delivery_placehospital	-0.574848	0.56968	-1.00907	0.315771	-1.70733	0.557638	8 weeks	Delivery place		Perinatal	ENS
2	delivery_typevaginal	0.406117	0.589207	0.68926	0.492515	-0.765187	1.57742	8 weeks	Delivery type		Perinatal	ENS
2	formulafeeding_8wyes	0.97523	0.390761	2.49572	0.0144795	0.198422	1.75204	8 weeks	Formulafeeding	*	Dietary	ENS
2	furrypet_home_yn_6myes	-0.362185	0.393949	-0.919369	0.360474	-1.14533	0.42096	8 weeks	Pets		Environmental	ENS
2	hospitalyes	-0.124163	0.40532	-0.306333	0.760092	-0.929911	0.681586	8 weeks	Hospitalisation		Perinatal	ENS
2	mat_AB_use_final_deliveryyes	0.751502	0.665739	1.12882	0.262111	-0.571944	2.07495	8 weeks	Intrapartum antibiotics		Parental	ENS
2	mat_AB_use_final_pregyes	0.309617	0.532047	0.581936	0.562132	-0.748057	1.36729	8 weeks	Antepartum antibiotics		Parental	ENS
2	mat_weightgain	0.080783	0.191119	0.422685	0.67358	-0.299149	0.460715	8 weeks	Maternal weight gain		Parental	ENS
2	older_siblingsyes	0.28284	0.400297	0.706576	0.48174	-0.512924	1.0786	8 weeks	Older siblings		Environmental	ENS
2	pregn_weeks	-0.0275763	0.242777	-0.113587	0.90983	-0.510202	0.455049	8 weeks	Gestational age		Perinatal	ENS
2	sexmale	0.310478	0.381716	0.813372	0.418251	-0.44835	1.0693	8 weeks	Sex		Perinatal	ENS
2	smoke_before_pregyes	0.20551	0.493006	0.41685	0.677827	-0.774555	1.18557	8 weeks	Prenatal smoking		Parental	ENS
2	twins.siblings_in_luckiyes	0.341106	0.498671	0.68403	0.495795	-0.65022	1.33243	8 weeks	Siblings in cohort		Environmental	ENS
3	(Intercept)	4.15478	0.873364	4.75721	7.73441e-06	2.41887	5.89068	8 weeks	NA	***	NA	ENS
3	atopy_fatheryes	-0.902399	0.369105	-2.44483	0.0165085	-1.63603	-0.168764	8 weeks	Father's atopy	*	Parental	ENS
3	atopy_motheryes	-0.729039	0.38749	-1.88144	0.0632562	-1.49922	0.0411389	8 weeks	Mother's atopy		Parental	ENS
3	birthweight	0.0740946	0.197705	0.374774	0.708741	-0.318865	0.467054	8 weeks	Birth weight		Perinatal	ENS
3	covid_270220yes	-0.0481394	0.404161	-0.119109	0.905463	-0.851453	0.755174	8 weeks	Collected during pandemic		Environmental	ENS
3	delivery_placehospital	-0.566754	0.56199	-1.00848	0.316022	-1.68377	0.550263	8 weeks	Delivery place		Perinatal	ENS
3	delivery_typevaginal	0.385216	0.556553	0.692146	0.490689	-0.720994	1.49143	8 weeks	Delivery type		Perinatal	ENS
3	formulafeeding_8wyes	0.975347	0.388537	2.51031	0.0139125	0.203088	1.74761	8 weeks	Formulafeeding	*	Dietary	ENS
3	furrypet_home_yn_6myes	-0.360176	0.391313	-0.920429	0.359894	-1.13795	0.417601	8 weeks	Pets		Environmental	ENS
3	hospitalyes	-0.122823	0.402843	-0.304891	0.761177	-0.923518	0.677871	8 weeks	Hospitalisation		Perinatal	ENS
3	mat_AB_use_final_deliveryyes	0.741179	0.655754	1.13027	0.261469	-0.562204	2.04456	8 weeks	Intrapartum antibiotics		Parental	ENS
3	mat_AB_use_final_pregyes	0.310136	0.529	0.586268	0.559214	-0.741309	1.36158	8 weeks	Antepartum antibiotics		Parental	ENS
3	mat_weightgain	0.0768402	0.186871	0.411194	0.681941	-0.294586	0.448267	8 weeks	Maternal weight gain		Parental	ENS
3	older_siblingsyes	0.2897	0.393464	0.736283	0.463539	-0.492351	1.07175	8 weeks	Older siblings		Environmental	ENS
3	sexmale	0.311952	0.379325	0.822386	0.413105	-0.441998	1.0659	8 weeks	Sex		Perinatal	ENS
3	smoke_before_pregyes	0.196442	0.483732	0.406096	0.685669	-0.765028	1.15791	8 weeks	Prenatal smoking		Parental	ENS
3	twins.siblings_in_luckiyes	0.343822	0.495264	0.694219	0.489394	-0.640569	1.32821	8 weeks	Siblings in cohort		Environmental	ENS
4	(Intercept)	4.14355	0.863392	4.79916	6.46728e-06	2.42775	5.85936	8 weeks	NA	***	NA	ENS
4	atopy_fatheryes	-0.904369	0.366663	-2.46648	0.0155829	-1.63303	-0.175703	8 weeks	Father's atopy	*	Parental	ENS
4	atopy_motheryes	-0.732924	0.383946	-1.90893	0.0595308	-1.49594	0.0300878	8 weeks	Mother's atopy		Parental	ENS
4	birthweight	0.0710399	0.194933	0.364432	0.71641	-0.316349	0.458429	8 weeks	Birth weight		Perinatal	ENS
4	delivery_placehospital	-0.562491	0.557699	-1.00859	0.315935	-1.6708	0.545819	8 weeks	Delivery place		Perinatal	ENS
4	delivery_typevaginal	0.383158	0.55316	0.692671	0.49034	-0.716132	1.48245	8 weeks	Delivery type		Perinatal	ENS
4	formulafeeding_8wyes	0.976248	0.386281	2.5273	0.0132806	0.208595	1.7439	8 weeks	Formulafeeding	*	Dietary	ENS
4	furrypet_home_yn_6myes	-0.3582	0.388765	-0.92138	0.359371	-1.13079	0.414389	8 weeks	Pets		Environmental	ENS
4	hospitalyes	-0.1284	0.397866	-0.322722	0.747671	-0.919074	0.662274	8 weeks	Hospitalisation		Perinatal	ENS
4	mat_AB_use_final_deliveryyes	0.742608	0.651962	1.13904	0.257779	-0.553029	2.03825	8 weeks	Intrapartum antibiotics		Parental	ENS
4	mat_AB_use_final_pregyes	0.297468	0.515289	0.577285	0.565221	-0.72656	1.3215	8 weeks	Antepartum antibiotics		Parental	ENS
4	mat_weightgain	0.0767345	0.185819	0.412952	0.680646	-0.292542	0.446011	8 weeks	Maternal weight gain		Parental	ENS
4	older_siblingsyes	0.29205	0.390761	0.747388	0.456822	-0.484506	1.06861	8 weeks	Older siblings		Environmental	ENS
4	sexmale	0.309103	0.376444	0.821112	0.413801	-0.439001	1.05721	8 weeks	Sex		Perinatal	ENS
4	smoke_before_pregyes	0.203527	0.477364	0.426357	0.670889	-0.745133	1.15219	8 weeks	Prenatal smoking		Parental	ENS
4	twins.siblings_in_luckiyes	0.344285	0.492467	0.699102	0.486332	-0.63439	1.32296	8 weeks	Siblings in cohort		Environmental	ENS
5	(Intercept)	4.07212	0.830322	4.90426	4.19681e-06	2.42229	5.72195	8 weeks	NA	***	NA	ENS
5	atopy_fatheryes	-0.894065	0.363427	-2.46009	0.0158221	-1.61619	-0.171943	8 weeks	Father's atopy	*	Parental	ENS
5	atopy_motheryes	-0.736672	0.381834	-1.9293	0.0568796	-1.49537	0.0220236	8 weeks	Mother's atopy		Parental	ENS
5	birthweight	0.0909183	0.184013	0.494087	0.622462	-0.274711	0.456547	8 weeks	Birth weight		Perinatal	ENS
5	delivery_placehospital	-0.580225	0.552185	-1.05078	0.296204	-1.67741	0.516955	8 weeks	Delivery place		Perinatal	ENS
5	delivery_typevaginal	0.423169	0.536368	0.788953	0.432236	-0.642582	1.48892	8 weeks	Delivery type		Perinatal	ENS
5	formulafeeding_8wyes	0.986353	0.383068	2.57488	0.0116783	0.225206	1.7475	8 weeks	Formulafeeding	*	Dietary	ENS
5	furrypet_home_yn_6myes	-0.359663	0.386777	-0.929895	0.354941	-1.12818	0.408856	8 weeks	Pets		Environmental	ENS
5	mat_AB_use_final_deliveryyes	0.706322	0.638952	1.10544	0.27195	-0.563263	1.97591	8 weeks	Intrapartum antibiotics		Parental	ENS
5	mat_AB_use_final_pregyes	0.305476	0.512094	0.596523	0.55234	-0.712044	1.323	8 weeks	Antepartum antibiotics		Parental	ENS
5	mat_weightgain	0.0677663	0.182803	0.370707	0.711736	-0.295458	0.430991	8 weeks	Maternal weight gain		Parental	ENS
5	older_siblingsyes	0.304096	0.387012	0.785753	0.434099	-0.464889	1.07308	8 weeks	Older siblings		Environmental	ENS
5	sexmale	0.291609	0.370641	0.78677	0.433507	-0.444847	1.02807	8 weeks	Sex		Perinatal	ENS
5	smoke_before_pregyes	0.203219	0.474954	0.427871	0.669779	-0.740505	1.14694	8 weeks	Prenatal smoking		Parental	ENS
5	twins.siblings_in_luckiyes	0.335175	0.489177	0.685182	0.49501	-0.636808	1.30716	8 weeks	Siblings in cohort		Environmental	ENS
6	(Intercept)	4.10915	0.820331	5.00913	2.70891e-06	2.47942	5.73888	8 weeks	NA	***	NA	ENS
6	atopy_fatheryes	-0.90542	0.360395	-2.5123	0.0137764	-1.62141	-0.189433	8 weeks	Father's atopy	*	Parental	ENS
6	atopy_motheryes	-0.721446	0.377795	-1.90962	0.0593669	-1.472	0.0291093	8 weeks	Mother's atopy		Parental	ENS
6	birthweight	0.106543	0.17826	0.597686	0.55155	-0.247601	0.460688	8 weeks	Birth weight		Perinatal	ENS
6	delivery_placehospital	-0.590674	0.548816	-1.07627	0.284684	-1.68099	0.499646	8 weeks	Delivery place		Perinatal	ENS
6	delivery_typevaginal	0.382873	0.522715	0.732471	0.465785	-0.655591	1.42134	8 weeks	Delivery type		Perinatal	ENS
6	formulafeeding_8wyes	0.975395	0.380091	2.56622	0.0119338	0.220279	1.73051	8 weeks	Formulafeeding	*	Dietary	ENS
6	furrypet_home_yn_6myes	-0.322296	0.371619	-0.867277	0.388097	-1.06058	0.415989	8 weeks	Pets		Environmental	ENS
6	mat_AB_use_final_deliveryyes	0.675798	0.630581	1.07171	0.286717	-0.576962	1.92856	8 weeks	Intrapartum antibiotics		Parental	ENS
6	mat_AB_use_final_pregyes	0.305318	0.509634	0.599093	0.550616	-0.707159	1.31779	8 weeks	Antepartum antibiotics		Parental	ENS
6	older_siblingsyes	0.335694	0.375695	0.893526	0.373958	-0.410691	1.08208	8 weeks	Older siblings		Environmental	ENS
6	sexmale	0.27101	0.364692	0.743121	0.459344	-0.453514	0.995535	8 weeks	Sex		Perinatal	ENS
6	smoke_before_pregyes	0.197446	0.472419	0.417947	0.676981	-0.741096	1.13599	8 weeks	Prenatal smoking		Parental	ENS
6	twins.siblings_in_luckiyes	0.324071	0.485913	0.666933	0.506521	-0.64128	1.28942	8 weeks	Siblings in cohort		Environmental	ENS
7	(Intercept)	4.14329	0.812543	5.09917	1.84685e-06	2.52928	5.75731	8 weeks	NA	***	NA	ENS
7	atopy_fatheryes	-0.904027	0.358741	-2.52	0.0134788	-1.61662	-0.191432	8 weeks	Father's atopy	*	Parental	ENS
7	atopy_motheryes	-0.709189	0.374943	-1.89146	0.0617437	-1.45397	0.0355888	8 weeks	Mother's atopy		Parental	ENS
7	birthweight	0.108285	0.177401	0.610397	0.54312	-0.2441	0.460671	8 weeks	Birth weight		Perinatal	ENS
7	delivery_placehospital	-0.60099	0.545769	-1.10118	0.273723	-1.68509	0.483114	8 weeks	Delivery place		Perinatal	ENS
7	delivery_typevaginal	0.378859	0.520251	0.728223	0.468347	-0.654556	1.41227	8 weeks	Delivery type		Perinatal	ENS
7	formulafeeding_8wyes	1.01299	0.367614	2.75559	0.00707682	0.282773	1.74321	8 weeks	Formulafeeding	**	Dietary	ENS
7	furrypet_home_yn_6myes	-0.308484	0.368464	-0.837215	0.404665	-1.04039	0.423425	8 weeks	Pets		Environmental	ENS
7	mat_AB_use_final_deliveryyes	0.659703	0.626544	1.05292	0.295164	-0.584849	1.90425	8 weeks	Intrapartum antibiotics		Parental	ENS
7	mat_AB_use_final_pregyes	0.281805	0.504217	0.558896	0.577605	-0.71976	1.28337	8 weeks	Antepartum antibiotics		Parental	ENS
7	older_siblingsyes	0.364999	0.367417	0.993419	0.32314	-0.36483	1.09483	8 weeks	Older siblings		Environmental	ENS
7	sexmale	0.246846	0.358443	0.688662	0.492788	-0.465157	0.95885	8 weeks	Sex		Perinatal	ENS
7	twins.siblings_in_luckiyes	0.290558	0.477073	0.609044	0.544013	-0.657089	1.23821	8 weeks	Siblings in cohort		Environmental	ENS
8	(Intercept)	4.15449	0.809255	5.13372	1.57685e-06	2.54724	5.76174	8 weeks	NA	***	NA	ENS
8	atopy_fatheryes	-0.864509	0.350387	-2.4673	0.0154639	-1.56041	-0.16861	8 weeks	Father's atopy	*	Parental	ENS
8	atopy_motheryes	-0.691034	0.372135	-1.85695	0.0665183	-1.43013	0.0480569	8 weeks	Mother's atopy		Parental	ENS
8	birthweight	0.0903829	0.173832	0.519944	0.604352	-0.254863	0.435628	8 weeks	Birth weight		Perinatal	ENS
8	delivery_placehospital	-0.547024	0.535148	-1.02219	0.309371	-1.60987	0.515827	8 weeks	Delivery place		Perinatal	ENS
8	delivery_typevaginal	0.341181	0.513933	0.663863	0.508439	-0.679535	1.3619	8 weeks	Delivery type		Perinatal	ENS
8	formulafeeding_8wyes	0.995845	0.36496	2.72864	0.00761862	0.271004	1.72069	8 weeks	Formulafeeding	**	Dietary	ENS
8	furrypet_home_yn_6myes	-0.300068	0.366778	-0.818119	0.415403	-1.02852	0.428384	8 weeks	Pets		Environmental	ENS
8	mat_AB_use_final_deliveryyes	0.656887	0.624177	1.0524	0.29537	-0.582783	1.89656	8 weeks	Intrapartum antibiotics		Parental	ENS
8	older_siblingsyes	0.373746	0.365709	1.02198	0.309471	-0.352583	1.10008	8 weeks	Older siblings		Environmental	ENS
8	sexmale	0.251517	0.357004	0.70452	0.482889	-0.457525	0.960558	8 weeks	Sex		Perinatal	ENS
8	twins.siblings_in_luckiyes	0.229938	0.46284	0.496797	0.620517	-0.689303	1.14918	8 weeks	Siblings in cohort		Environmental	ENS
9	(Intercept)	4.24479	0.785379	5.40476	4.98372e-07	2.68518	5.80439	8 weeks	NA	***	NA	ENS
9	atopy_fatheryes	-0.853513	0.348269	-2.45073	0.0161261	-1.54511	-0.161921	8 weeks	Father's atopy	*	Parental	ENS
9	atopy_motheryes	-0.739223	0.357813	-2.06595	0.0416146	-1.44977	-0.0286777	8 weeks	Mother's atopy	*	Parental	ENS
9	birthweight	0.0724349	0.169347	0.427732	0.669835	-0.263854	0.408724	8 weeks	Birth weight		Perinatal	ENS
9	delivery_placehospital	-0.580196	0.528812	-1.09717	0.2754	-1.63031	0.469919	8 weeks	Delivery place		Perinatal	ENS
9	delivery_typevaginal	0.325695	0.510906	0.637485	0.525375	-0.688862	1.34025	8 weeks	Delivery type		Perinatal	ENS
9	formulafeeding_8wyes	1.00283	0.363209	2.76103	0.00694205	0.28157	1.72409	8 weeks	Formulafeeding	**	Dietary	ENS
9	furrypet_home_yn_6myes	-0.307203	0.365009	-0.841631	0.402153	-1.03204	0.417633	8 weeks	Pets		Environmental	ENS
9	mat_AB_use_final_deliveryyes	0.670465	0.621049	1.07957	0.283126	-0.562814	1.90374	8 weeks	Intrapartum antibiotics		Parental	ENS
9	older_siblingsyes	0.402604	0.359601	1.11958	0.265774	-0.311493	1.1167	8 weeks	Older siblings		Environmental	ENS
9	sexmale	0.259537	0.355192	0.730695	0.466802	-0.445804	0.964878	8 weeks	Sex		Perinatal	ENS
10	(Intercept)	4.26536	0.780491	5.46497	3.78561e-07	2.71568	5.81504	8 weeks	NA	***	NA	ENS
10	atopy_fatheryes	-0.845343	0.34623	-2.44157	0.0164948	-1.53279	-0.157895	8 weeks	Father's atopy	*	Parental	ENS
10	atopy_motheryes	-0.749689	0.355421	-2.1093	0.0375765	-1.45538	-0.0439927	8 weeks	Mother's atopy	*	Parental	ENS
10	delivery_placehospital	-0.573077	0.526248	-1.08899	0.278944	-1.61795	0.471801	8 weeks	Delivery place		Perinatal	ENS
10	delivery_typevaginal	0.304813	0.506353	0.601978	0.548638	-0.700562	1.31019	8 weeks	Delivery type		Perinatal	ENS
10	formulafeeding_8wyes	0.981126	0.35808	2.73996	0.00735326	0.270149	1.6921	8 weeks	Formulafeeding	**	Dietary	ENS
10	furrypet_home_yn_6myes	-0.324981	0.361056	-0.900085	0.370375	-1.04187	0.391904	8 weeks	Pets		Environmental	ENS
10	mat_AB_use_final_deliveryyes	0.70323	0.613622	1.14603	0.254692	-0.515131	1.92159	8 weeks	Intrapartum antibiotics		Parental	ENS
10	older_siblingsyes	0.391575	0.357113	1.0965	0.275661	-0.317482	1.10063	8 weeks	Older siblings		Environmental	ENS
10	sexmale	0.268603	0.353015	0.760884	0.448631	-0.432316	0.969522	8 weeks	Sex		Perinatal	ENS
11	(Intercept)	4.54159	0.629228	7.21772	1.28951e-10	3.29241	5.79077	8 weeks	NA	***	NA	ENS
11	atopy_fatheryes	-0.84293	0.345043	-2.44297	0.0164145	-1.52793	-0.157934	8 weeks	Father's atopy	*	Parental	ENS
11	atopy_motheryes	-0.711222	0.348454	-2.04108	0.0440168	-1.40299	-0.0194535	8 weeks	Mother's atopy	*	Parental	ENS
11	delivery_placehospital	-0.596659	0.523024	-1.14079	0.256826	-1.63499	0.441674	8 weeks	Delivery place		Perinatal	ENS
11	formulafeeding_8wyes	0.956418	0.354524	2.69775	0.0082612	0.252598	1.66024	8 weeks	Formulafeeding	**	Dietary	ENS
11	furrypet_home_yn_6myes	-0.340504	0.358923	-0.948682	0.34519	-1.05306	0.372049	8 weeks	Pets		Environmental	ENS
11	mat_AB_use_final_deliveryyes	0.620421	0.595994	1.04099	0.300525	-0.562777	1.80362	8 weeks	Intrapartum antibiotics		Parental	ENS
11	older_siblingsyes	0.41826	0.35316	1.18434	0.239235	-0.282852	1.11937	8 weeks	Older siblings		Environmental	ENS
11	sexmale	0.257883	0.35138	0.733916	0.464807	-0.439694	0.955461	8 weeks	Sex		Perinatal	ENS
12	(Intercept)	4.65779	0.607516	7.66695	1.4301e-11	3.45189	5.8637	8 weeks	NA	***	NA	ENS
12	atopy_fatheryes	-0.823669	0.343215	-2.39986	0.0183307	-1.50495	-0.142391	8 weeks	Father's atopy	*	Parental	ENS
12	atopy_motheryes	-0.699667	0.34726	-2.01482	0.0467203	-1.38897	-0.0103609	8 weeks	Mother's atopy	*	Parental	ENS
12	delivery_placehospital	-0.560722	0.519473	-1.0794	0.283112	-1.59187	0.470425	8 weeks	Delivery place		Perinatal	ENS
12	formulafeeding_8wyes	0.950907	0.353592	2.68928	0.00844431	0.249032	1.65278	8 weeks	Formulafeeding	**	Dietary	ENS
12	furrypet_home_yn_6myes	-0.338836	0.358052	-0.946331	0.346356	-1.04956	0.371892	8 weeks	Pets		Environmental	ENS
12	mat_AB_use_final_deliveryyes	0.554385	0.587746	0.94324	0.347926	-0.612281	1.72105	8 weeks	Intrapartum antibiotics		Parental	ENS
12	older_siblingsyes	0.421528	0.352283	1.19656	0.234424	-0.277747	1.1208	8 weeks	Older siblings		Environmental	ENS
13	(Intercept)	4.59892	0.603957	7.61464	1.75206e-11	3.40023	5.79761	8 weeks	NA	***	NA	ENS
13	atopy_fatheryes	-0.812516	0.342817	-2.37012	0.0197611	-1.49291	-0.13212	8 weeks	Father's atopy	*	Parental	ENS
13	atopy_motheryes	-0.665368	0.345155	-1.92774	0.0568128	-1.35041	0.0196686	8 weeks	Mother's atopy		Parental	ENS
13	delivery_placehospital	-0.503544	0.515631	-0.976558	0.331217	-1.52693	0.519841	8 weeks	Delivery place		Perinatal	ENS
13	formulafeeding_8wyes	0.964164	0.353112	2.73048	0.0075124	0.263335	1.66499	8 weeks	Formulafeeding	**	Dietary	ENS
13	furrypet_home_yn_6myes	-0.291113	0.354258	-0.821754	0.413232	-0.994217	0.411991	8 weeks	Pets		Environmental	ENS
13	older_siblingsyes	0.454111	0.350386	1.29603	0.19804	-0.241308	1.14953	8 weeks	Older siblings		Environmental	ENS
14	(Intercept)	4.5151	0.591103	7.63843	1.41605e-11	3.34222	5.68797	8 weeks	NA	***	NA	ENS
14	atopy_fatheryes	-0.812025	0.339219	-2.39381	0.0185582	-1.48511	-0.138941	8 weeks	Father's atopy	*	Parental	ENS
14	atopy_motheryes	-0.635223	0.339	-1.87382	0.063905	-1.30787	0.0374259	8 weeks	Mother's atopy		Parental	ENS
14	delivery_placehospital	-0.554194	0.508395	-1.09009	0.278322	-1.56296	0.454572	8 weeks	Delivery place		Perinatal	ENS
14	formulafeeding_8wyes	0.948699	0.348818	2.71976	0.00771678	0.25657	1.64083	8 weeks	Formulafeeding	**	Dietary	ENS
14	older_siblingsyes	0.469521	0.346778	1.35395	0.178834	-0.218562	1.1576	8 weeks	Older siblings		Environmental	ENS
15	(Intercept)	4.03721	0.396876	10.1725	4.14625e-17	3.24982	4.8246	8 weeks	NA	***	NA	ENS
15	atopy_fatheryes	-0.758113	0.33591	-2.25689	0.0261905	-1.42455	-0.091676	8 weeks	Father's atopy	*	Parental	ENS
15	atopy_motheryes	-0.632583	0.33931	-1.86432	0.0652097	-1.30576	0.0405985	8 weeks	Mother's atopy		Parental	ENS
15	formulafeeding_8wyes	0.842209	0.335174	2.51275	0.0135777	0.177234	1.50718	8 weeks	Formulafeeding	*	Dietary	ENS
15	older_siblingsyes	0.534183	0.341989	1.56199	0.12145	-0.144314	1.21268	8 weeks	Older siblings		Environmental	ENS
1	(Intercept)	6.28092	1.5049	4.17364	8.08009e-05	3.28233	9.2795	4 months	NA	***	NA	ENS
1	ageintrosolids	-0.262945	0.25161	-1.04505	0.299402	-0.764288	0.238398	4 months	Compelmentary foods age		Dietary	ENS
1	atopy_fatheryes	0.299133	0.508194	0.58862	0.557909	-0.713466	1.31173	4 months	Father's atopy		Parental	ENS
1	atopy_motheryes	0.166003	0.540596	0.307074	0.759649	-0.911158	1.24317	4 months	Mother's atopy		Parental	ENS
1	birthweight	0.0657518	0.353069	0.186229	0.852774	-0.637753	0.769256	4 months	Birth weight		Perinatal	ENS
1	breastfeeding_4myes	-2.38259	0.765049	-3.11429	0.00262251	-3.90698	-0.858194	4 months	Breastfeeding	**	Dietary	ENS
1	covid_270220yes	-0.151359	0.618595	-0.244682	0.80738	-1.38394	1.08122	4 months	Collected during pandemic		Environmental	ENS
1	daycare_6myes	0.038048	0.60144	0.0632614	0.949729	-1.16035	1.23644	4 months	Daycare		Environmental	ENS
1	delivery_placehospital	-0.859975	0.776443	-1.10758	0.27163	-2.40707	0.687122	4 months	Delivery place		Perinatal	ENS
1	delivery_typevaginal	-0.441109	0.867072	-0.508734	0.612452	-2.16879	1.28657	4 months	Delivery type		Perinatal	ENS
1	formulafeeding_4myes	0.321843	0.745608	0.431652	0.667249	-1.16381	1.8075	4 months	Formulafeeding		Dietary	ENS
1	furrypet_home_yn_6myes	0.149384	0.547815	0.272691	0.785851	-0.942161	1.24093	4 months	Pets		Environmental	ENS
1	hospitalyes	0.0975464	0.544411	0.179178	0.858288	-0.987217	1.18231	4 months	Hospitalisation		Perinatal	ENS
1	mat_AB_use_final_deliveryyes	0.233274	0.828468	0.281573	0.779057	-1.41748	1.88403	4 months	Intrapartum antibiotics		Parental	ENS
1	mat_AB_use_final_pregyes	0.0143862	0.813693	0.0176801	0.985942	-1.60693	1.63571	4 months	Antepartum antibiotics		Parental	ENS
1	mat_weightgain	-0.0672805	0.506201	-0.132913	0.894623	-1.07591	0.941347	4 months	Maternal weight gain		Parental	ENS
1	older_siblingsyes	0.996311	0.565154	1.7629	0.0820458	-0.129783	2.12241	4 months	Older siblings		Environmental	ENS
1	pregn_weeks	0.0121288	0.323017	0.0375484	0.970149	-0.631497	0.655754	4 months	Gestational age		Perinatal	ENS
1	sexmale	0.749274	0.522082	1.43517	0.155453	-0.290997	1.78954	4 months	Sex		Perinatal	ENS
1	smoke_before_pregyes	-0.864294	0.667392	-1.29503	0.199335	-2.1941	0.465513	4 months	Prenatal smoking		Parental	ENS
1	twins.siblings_in_luckiyes	-0.808172	0.769931	-1.04967	0.297286	-2.34229	0.725948	4 months	Siblings in cohort		Environmental	ENS
2	(Intercept)	6.28323	1.48919	4.21923	6.78754e-05	3.31661	9.24985	4 months	NA	***	NA	ENS
2	ageintrosolids	-0.263237	0.249386	-1.05554	0.294566	-0.760039	0.233565	4 months	Compelmentary foods age		Dietary	ENS
2	atopy_fatheryes	0.300406	0.499701	0.601172	0.549538	-0.695049	1.29586	4 months	Father's atopy		Parental	ENS
2	atopy_motheryes	0.167056	0.533713	0.313008	0.755144	-0.896155	1.23027	4 months	Mother's atopy		Parental	ENS
2	birthweight	0.0654933	0.350407	0.186906	0.852239	-0.632553	0.763539	4 months	Birth weight		Perinatal	ENS
2	breastfeeding_4myes	-2.38334	0.758741	-3.14118	0.00240847	-3.89483	-0.871854	4 months	Breastfeeding	**	Dietary	ENS
2	covid_270220yes	-0.14827	0.589438	-0.251544	0.802081	-1.32249	1.02595	4 months	Collected during pandemic		Environmental	ENS
2	daycare_6myes	0.0380024	0.597413	0.0636116	0.949449	-1.15211	1.22811	4 months	Daycare		Environmental	ENS
2	delivery_placehospital	-0.857346	0.756982	-1.13258	0.260997	-2.36533	0.650639	4 months	Delivery place		Perinatal	ENS
2	delivery_typevaginal	-0.443426	0.851383	-0.52083	0.60402	-2.13947	1.25262	4 months	Delivery type		Perinatal	ENS
2	formulafeeding_4myes	0.320157	0.734538	0.435862	0.664189	-1.14312	1.78343	4 months	Formulafeeding		Dietary	ENS
2	furrypet_home_yn_6myes	0.149393	0.544152	0.274542	0.784423	-0.934613	1.2334	4 months	Pets		Environmental	ENS
2	hospitalyes	0.0954919	0.528308	0.180751	0.857051	-0.956951	1.14793	4 months	Hospitalisation		Perinatal	ENS
2	mat_AB_use_final_deliveryyes	0.231941	0.81951	0.283023	0.777939	-1.40061	1.86449	4 months	Intrapartum antibiotics		Parental	ENS
2	mat_weightgain	-0.0679216	0.501524	-0.13543	0.892634	-1.06701	0.931166	4 months	Maternal weight gain		Parental	ENS
2	older_siblingsyes	0.997106	0.559597	1.78183	0.078825	-0.117668	2.11188	4 months	Older siblings		Environmental	ENS
2	pregn_weeks	0.0114568	0.318628	0.0359566	0.971413	-0.623283	0.646196	4 months	Gestational age		Perinatal	ENS
2	sexmale	0.749319	0.518584	1.44493	0.152642	-0.283754	1.78239	4 months	Sex		Perinatal	ENS
2	smoke_before_pregyes	-0.86493	0.661965	-1.30661	0.195338	-2.18363	0.453771	4 months	Prenatal smoking		Parental	ENS
2	twins.siblings_in_luckiyes	-0.809978	0.758024	-1.06854	0.288705	-2.32004	0.700084	4 months	Siblings in cohort		Environmental	ENS
3	(Intercept)	6.28818	1.47304	4.26884	5.6111e-05	3.35436	9.22199	4 months	NA	***	NA	ENS
3	ageintrosolids	-0.263525	0.247614	-1.06426	0.290581	-0.756691	0.22964	4 months	Compelmentary foods age		Dietary	ENS
3	atopy_fatheryes	0.298874	0.494598	0.604276	0.54746	-0.686204	1.28395	4 months	Father's atopy		Parental	ENS
3	atopy_motheryes	0.166546	0.530008	0.314234	0.754204	-0.889055	1.22215	4 months	Mother's atopy		Parental	ENS
3	birthweight	0.0727812	0.283953	0.256314	0.798401	-0.49276	0.638322	4 months	Birth weight		Perinatal	ENS
3	breastfeeding_4myes	-2.38443	0.753145	-3.16596	0.0022248	-3.88445	-0.884409	4 months	Breastfeeding	**	Dietary	ENS
3	covid_270220yes	-0.149702	0.584215	-0.256244	0.798454	-1.31327	1.01386	4 months	Collected during pandemic		Environmental	ENS
3	daycare_6myes	0.0380791	0.593471	0.0641634	0.949009	-1.14392	1.22008	4 months	Daycare		Environmental	ENS
3	delivery_placehospital	-0.863235	0.734183	-1.17577	0.243355	-2.32549	0.599019	4 months	Delivery place		Perinatal	ENS
3	delivery_typevaginal	-0.43667	0.824918	-0.52935	0.598106	-2.07964	1.2063	4 months	Delivery type		Perinatal	ENS
3	formulafeeding_4myes	0.319503	0.729472	0.437992	0.662634	-1.13337	1.77237	4 months	Formulafeeding		Dietary	ENS
3	furrypet_home_yn_6myes	0.147848	0.538878	0.274363	0.78455	-0.92542	1.22112	4 months	Pets		Environmental	ENS
3	hospitalyes	0.0948929	0.524564	0.180899	0.856929	-0.949867	1.13965	4 months	Hospitalisation		Perinatal	ENS
3	mat_AB_use_final_deliveryyes	0.231092	0.81377	0.283977	0.7772	-1.38967	1.85185	4 months	Intrapartum antibiotics		Parental	ENS
3	mat_weightgain	-0.0667921	0.49724	-0.134326	0.8935	-1.05713	0.923547	4 months	Maternal weight gain		Parental	ENS
3	older_siblingsyes	0.994821	0.552314	1.80119	0.07564	-0.105208	2.09485	4 months	Older siblings		Environmental	ENS
3	sexmale	0.746173	0.50778	1.46948	0.14583	-0.265159	1.7575	4 months	Sex		Perinatal	ENS
3	smoke_before_pregyes	-0.860098	0.643905	-1.33575	0.185616	-2.14255	0.42235	4 months	Prenatal smoking		Parental	ENS
3	twins.siblings_in_luckiyes	-0.813578	0.746428	-1.08996	0.279174	-2.30022	0.673062	4 months	Siblings in cohort		Environmental	ENS
4	(Intercept)	5.76588	1.37417	4.1959	6.71222e-05	3.03319	8.49858	4 months	NA	***	NA	ENS
4	ageintrosolids	-0.247558	0.236659	-1.04606	0.298536	-0.71818	0.223064	4 months	Compelmentary foods age		Dietary	ENS
4	atopy_fatheryes	0.343678	0.470331	0.730716	0.466986	-0.591626	1.27898	4 months	Father's atopy		Parental	ENS
4	atopy_motheryes	0.0811233	0.474888	0.170826	0.864771	-0.863243	1.02549	4 months	Mother's atopy		Parental	ENS
4	birthweight	0.14519	0.257576	0.563681	0.574473	-0.367027	0.657408	4 months	Birth weight		Perinatal	ENS
4	breastfeeding_4myes	-1.98953	0.673981	-2.95191	0.00409311	-3.32982	-0.649248	4 months	Breastfeeding	**	Dietary	ENS
4	covid_270220yes	-0.19988	0.550504	-0.363086	0.717453	-1.29462	0.894857	4 months	Collected during pandemic		Environmental	ENS
4	delivery_placehospital	-0.794	0.710586	-1.11739	0.267014	-2.20708	0.619078	4 months	Delivery place		Perinatal	ENS
4	delivery_typevaginal	-0.259497	0.763894	-0.339704	0.734928	-1.77858	1.25959	4 months	Delivery type		Perinatal	ENS
4	formulafeeding_4myes	0.572006	0.66088	0.865522	0.389217	-0.742226	1.88624	4 months	Formulafeeding		Dietary	ENS
4	furrypet_home_yn_6myes	0.268258	0.49564	0.541236	0.589778	-0.717377	1.25389	4 months	Pets		Environmental	ENS
4	hospitalyes	-0.0798542	0.50143	-0.159253	0.873852	-1.077	0.917295	4 months	Hospitalisation		Perinatal	ENS
4	mat_AB_use_final_deliveryyes	0.0158999	0.734184	0.0216566	0.982773	-1.4441	1.4759	4 months	Intrapartum antibiotics		Parental	ENS
4	mat_weightgain	-0.205537	0.468934	-0.438307	0.662289	-1.13806	0.72699	4 months	Maternal weight gain		Parental	ENS
4	older_siblingsyes	0.963433	0.514646	1.87203	0.0646821	-0.059996	1.98686	4 months	Older siblings		Environmental	ENS
4	sexmale	0.70454	0.478456	1.47253	0.144616	-0.246923	1.656	4 months	Sex		Perinatal	ENS
4	smoke_before_pregyes	-0.748565	0.613014	-1.22112	0.225456	-1.96761	0.47048	4 months	Prenatal smoking		Parental	ENS
4	twins.siblings_in_luckiyes	-0.588316	0.681973	-0.862667	0.390777	-1.94449	0.767863	4 months	Siblings in cohort		Environmental	ENS
5	(Intercept)	5.76565	1.36603	4.22075	6.07153e-05	3.04962	8.48167	4 months	NA	***	NA	ENS
5	ageintrosolids	-0.246661	0.231632	-1.06488	0.289944	-0.707207	0.213885	4 months	Compelmentary foods age		Dietary	ENS
5	atopy_fatheryes	0.344679	0.465294	0.740778	0.46087	-0.580449	1.26981	4 months	Father's atopy		Parental	ENS
5	atopy_motheryes	0.0822504	0.469244	0.175283	0.861274	-0.850732	1.01523	4 months	Mother's atopy		Parental	ENS
5	birthweight	0.145617	0.255307	0.570361	0.569937	-0.362001	0.653235	4 months	Birth weight		Perinatal	ENS
5	breastfeeding_4myes	-1.98848	0.668268	-2.97557	0.00380705	-3.31718	-0.659786	4 months	Breastfeeding	**	Dietary	ENS
5	covid_270220yes	-0.199707	0.5472	-0.364962	0.716046	-1.28769	0.888273	4 months	Collected during pandemic		Environmental	ENS
5	delivery_placehospital	-0.792553	0.703268	-1.12696	0.262932	-2.19084	0.605731	4 months	Delivery place		Perinatal	ENS
5	delivery_typevaginal	-0.263035	0.74182	-0.354581	0.723782	-1.73797	1.2119	4 months	Delivery type		Perinatal	ENS
5	formulafeeding_4myes	0.573345	0.654103	0.876536	0.383209	-0.727187	1.87388	4 months	Formulafeeding		Dietary	ENS
5	furrypet_home_yn_6myes	0.26884	0.491994	0.54643	0.586202	-0.709375	1.24705	4 months	Pets		Environmental	ENS
5	hospitalyes	-0.0786052	0.495165	-0.158745	0.874246	-1.06313	0.905916	4 months	Hospitalisation		Perinatal	ENS
5	mat_weightgain	-0.206745	0.462858	-0.446671	0.656248	-1.12703	0.71354	4 months	Maternal weight gain		Parental	ENS
5	older_siblingsyes	0.964411	0.509639	1.89234	0.0618494	-0.048887	1.97771	4 months	Older siblings		Environmental	ENS
5	sexmale	0.704369	0.47557	1.4811	0.142276	-0.241192	1.64993	4 months	Sex		Perinatal	ENS
5	smoke_before_pregyes	-0.747669	0.608008	-1.2297	0.222202	-1.95655	0.461214	4 months	Prenatal smoking		Parental	ENS
5	twins.siblings_in_luckiyes	-0.587257	0.676208	-0.868456	0.38759	-1.93174	0.757226	4 months	Siblings in cohort		Environmental	ENS
6	(Intercept)	5.74136	1.34972	4.25375	5.32685e-05	3.05821	8.42452	4 months	NA	***	NA	ENS
6	ageintrosolids	-0.244774	0.230012	-1.06418	0.290226	-0.702022	0.212474	4 months	Compelmentary foods age		Dietary	ENS
6	atopy_fatheryes	0.356143	0.457043	0.779234	0.437981	-0.552428	1.26471	4 months	Father's atopy		Parental	ENS
6	atopy_motheryes	0.0740166	0.463718	0.159616	0.873558	-0.847824	0.995857	4 months	Mother's atopy		Parental	ENS
6	birthweight	0.148895	0.253024	0.588461	0.557765	-0.354101	0.65189	4 months	Birth weight		Perinatal	ENS
6	breastfeeding_4myes	-1.99369	0.66367	-3.00404	0.00348929	-3.31302	-0.674355	4 months	Breastfeeding	**	Dietary	ENS
6	covid_270220yes	-0.208057	0.54157	-0.384173	0.701798	-1.28466	0.868549	4 months	Collected during pandemic		Environmental	ENS
6	delivery_placehospital	-0.810832	0.689834	-1.1754	0.243078	-2.18218	0.560514	4 months	Delivery place		Perinatal	ENS
6	delivery_typevaginal	-0.24567	0.72954	-0.336746	0.737129	-1.69595	1.20461	4 months	Delivery type		Perinatal	ENS
6	formulafeeding_4myes	0.573439	0.650385	0.881692	0.380401	-0.719483	1.86636	4 months	Formulafeeding		Dietary	ENS
6	furrypet_home_yn_6myes	0.266843	0.489037	0.545649	0.58672	-0.705331	1.23902	4 months	Pets		Environmental	ENS
6	mat_weightgain	-0.204759	0.460059	-0.445071	0.657387	-1.11933	0.709808	4 months	Maternal weight gain		Parental	ENS
6	older_siblingsyes	0.979313	0.498072	1.96621	0.0525	-0.0108205	1.96945	4 months	Older siblings		Environmental	ENS
6	sexmale	0.695959	0.469924	1.481	0.14226	-0.238219	1.63014	4 months	Sex		Perinatal	ENS
6	smoke_before_pregyes	-0.755437	0.602592	-1.25365	0.213368	-1.95335	0.442476	4 months	Prenatal smoking		Parental	ENS
6	twins.siblings_in_luckiyes	-0.616074	0.647685	-0.951193	0.344172	-1.90363	0.671482	4 months	Siblings in cohort		Environmental	ENS
7	(Intercept)	5.76743	1.33228	4.32898	3.99041e-05	3.11937	8.41548	4 months	NA	***	NA	ENS
7	ageintrosolids	-0.246089	0.228573	-1.07663	0.284622	-0.700402	0.208225	4 months	Compelmentary foods age		Dietary	ENS
7	atopy_fatheryes	0.353866	0.454254	0.779003	0.438092	-0.549014	1.25674	4 months	Father's atopy		Parental	ENS
7	birthweight	0.145947	0.250932	0.581621	0.562326	-0.352807	0.644702	4 months	Birth weight		Perinatal	ENS
7	breastfeeding_4myes	-1.98065	0.654922	-3.02425	0.00327575	-3.28237	-0.678917	4 months	Breastfeeding	**	Dietary	ENS
7	covid_270220yes	-0.197054	0.534148	-0.368913	0.713089	-1.25873	0.864624	4 months	Collected during pandemic		Environmental	ENS
7	delivery_placehospital	-0.811479	0.685948	-1.183	0.24003	-2.17488	0.551917	4 months	Delivery place		Perinatal	ENS
7	delivery_typevaginal	-0.23014	0.718963	-0.320101	0.74966	-1.65916	1.19888	4 months	Delivery type		Perinatal	ENS
7	formulafeeding_4myes	0.571078	0.646565	0.88325	0.379535	-0.714039	1.8562	4 months	Formulafeeding		Dietary	ENS
7	furrypet_home_yn_6myes	0.253987	0.47965	0.529525	0.59779	-0.699369	1.20734	4 months	Pets		Environmental	ENS
7	mat_weightgain	-0.199122	0.456125	-0.436551	0.663519	-1.10572	0.707477	4 months	Maternal weight gain		Parental	ENS
7	older_siblingsyes	0.969012	0.491099	1.97315	0.051653	-0.00710058	1.94513	4 months	Older siblings		Environmental	ENS
7	sexmale	0.697108	0.46723	1.492	0.139316	-0.231562	1.62578	4 months	Sex		Perinatal	ENS
7	smoke_before_pregyes	-0.744693	0.595457	-1.25062	0.214425	-1.92823	0.438842	4 months	Prenatal smoking		Parental	ENS
7	twins.siblings_in_luckiyes	-0.62083	0.643366	-0.964972	0.337233	-1.89959	0.657929	4 months	Siblings in cohort		Environmental	ENS
8	(Intercept)	5.55359	1.14681	4.84266	5.44327e-06	3.27455	7.83263	4 months	NA	***	NA	ENS
8	ageintrosolids	-0.247889	0.227336	-1.09041	0.278509	-0.699671	0.203893	4 months	Compelmentary foods age		Dietary	ENS
8	atopy_fatheryes	0.353781	0.451932	0.782819	0.435835	-0.544338	1.2519	4 months	Father's atopy		Parental	ENS
8	birthweight	0.160581	0.245471	0.654174	0.514706	-0.327241	0.648403	4 months	Birth weight		Perinatal	ENS
8	breastfeeding_4myes	-1.99595	0.649834	-3.07148	0.0028339	-3.28736	-0.704545	4 months	Breastfeeding	**	Dietary	ENS
8	covid_270220yes	-0.192899	0.531261	-0.363097	0.717403	-1.24867	0.86287	4 months	Collected during pandemic		Environmental	ENS
8	delivery_placehospital	-0.787092	0.678219	-1.16053	0.248972	-2.13491	0.560725	4 months	Delivery place		Perinatal	ENS
8	formulafeeding_4myes	0.58075	0.642557	0.903811	0.368563	-0.696196	1.8577	4 months	Formulafeeding		Dietary	ENS
8	furrypet_home_yn_6myes	0.244545	0.476294	0.513433	0.608935	-0.70199	1.19108	4 months	Pets		Environmental	ENS
8	mat_weightgain	-0.163005	0.439691	-0.370727	0.711732	-1.0368	0.710787	4 months	Maternal weight gain		Parental	ENS
8	older_siblingsyes	0.943791	0.482259	1.95702	0.0535149	-0.0145975	1.90218	4 months	Older siblings		Environmental	ENS
8	sexmale	0.695998	0.464828	1.49732	0.137888	-0.22775	1.61975	4 months	Sex		Perinatal	ENS
8	smoke_before_pregyes	-0.735997	0.591796	-1.24367	0.216925	-1.91207	0.440072	4 months	Prenatal smoking		Parental	ENS
8	twins.siblings_in_luckiyes	-0.598178	0.636193	-0.940247	0.349665	-1.86248	0.666121	4 months	Siblings in cohort		Environmental	ENS
9	(Intercept)	5.58498	1.13795	4.90793	4.13567e-06	3.3239	7.84607	4 months	NA	***	NA	ENS
9	ageintrosolids	-0.247727	0.226224	-1.09505	0.276448	-0.697229	0.201775	4 months	Compelmentary foods age		Dietary	ENS
9	atopy_fatheryes	0.342045	0.44857	0.762522	0.447765	-0.549255	1.23334	4 months	Father's atopy		Parental	ENS
9	birthweight	0.164866	0.243988	0.675714	0.500974	-0.319933	0.649666	4 months	Birth weight		Perinatal	ENS
9	breastfeeding_4myes	-2.06892	0.614959	-3.36432	0.00113358	-3.29083	-0.847011	4 months	Breastfeeding	**	Dietary	ENS
9	delivery_placehospital	-0.788515	0.674892	-1.16836	0.245782	-2.12951	0.55248	4 months	Delivery place		Perinatal	ENS
9	formulafeeding_4myes	0.518458	0.616204	0.841375	0.402393	-0.705926	1.74284	4 months	Formulafeeding		Dietary	ENS
9	furrypet_home_yn_6myes	0.239472	0.473762	0.505468	0.614479	-0.701883	1.18083	4 months	Pets		Environmental	ENS
9	mat_weightgain	-0.178567	0.435457	-0.410067	0.682742	-1.04381	0.686678	4 months	Maternal weight gain		Parental	ENS
9	older_siblingsyes	0.967695	0.475409	2.0355	0.0447745	0.0230676	1.91232	4 months	Older siblings	*	Environmental	ENS
9	sexmale	0.680871	0.460694	1.47792	0.142958	-0.234518	1.59626	4 months	Sex		Perinatal	ENS
9	smoke_before_pregyes	-0.710584	0.584769	-1.21515	0.227522	-1.87251	0.45134	4 months	Prenatal smoking		Parental	ENS
9	twins.siblings_in_luckiyes	-0.566486	0.627096	-0.903349	0.368779	-1.81251	0.67954	4 months	Siblings in cohort		Environmental	ENS
10	(Intercept)	5.53369	1.12582	4.91527	3.9584e-06	3.29706	7.77032	4 months	NA	***	NA	ENS
10	ageintrosolids	-0.270675	0.218177	-1.24062	0.217971	-0.704123	0.162772	4 months	Compelmentary foods age		Dietary	ENS
10	atopy_fatheryes	0.350902	0.445975	0.78682	0.433454	-0.535105	1.23691	4 months	Father's atopy		Parental	ENS
10	birthweight	0.137337	0.233484	0.588207	0.557866	-0.32652	0.601194	4 months	Birth weight		Perinatal	ENS
10	breastfeeding_4myes	-2.01414	0.597492	-3.37099	0.00110508	-3.20116	-0.827116	4 months	Breastfeeding	**	Dietary	ENS
10	delivery_placehospital	-0.781297	0.671537	-1.16345	0.247724	-2.11542	0.552828	4 months	Delivery place		Perinatal	ENS
10	formulafeeding_4myes	0.509106	0.612929	0.830612	0.408391	-0.708585	1.7268	4 months	Formulafeeding		Dietary	ENS
10	furrypet_home_yn_6myes	0.203172	0.463262	0.438567	0.662026	-0.71718	1.12352	4 months	Pets		Environmental	ENS
10	older_siblingsyes	0.975478	0.472829	2.06307	0.0419873	0.0361206	1.91484	4 months	Older siblings	*	Environmental	ENS
10	sexmale	0.707735	0.4539	1.55923	0.122451	-0.194016	1.60949	4 months	Sex		Perinatal	ENS
10	smoke_before_pregyes	-0.712485	0.582042	-1.22411	0.224105	-1.86881	0.443843	4 months	Prenatal smoking		Parental	ENS
10	twins.siblings_in_luckiyes	-0.66442	0.577152	-1.15121	0.252697	-1.81103	0.482193	4 months	Siblings in cohort		Environmental	ENS
11	(Intercept)	5.62176	1.10959	5.06653	2.07928e-06	3.41802	7.82549	4 months	NA	***	NA	ENS
11	ageintrosolids	-0.266147	0.216566	-1.22894	0.222228	-0.696266	0.163972	4 months	Compelmentary foods age		Dietary	ENS
11	atopy_fatheryes	0.390623	0.440203	0.88737	0.377194	-0.483658	1.2649	4 months	Father's atopy		Parental	ENS
11	birthweight	0.151242	0.228911	0.660704	0.510453	-0.303394	0.605879	4 months	Birth weight		Perinatal	ENS
11	breastfeeding_4myes	-2.06	0.584389	-3.52505	0.000662023	-3.22065	-0.899352	4 months	Breastfeeding	***	Dietary	ENS
11	delivery_placehospital	-0.739744	0.658921	-1.12266	0.264503	-2.04842	0.56893	4 months	Delivery place		Perinatal	ENS
11	formulafeeding_4myes	0.52976	0.605587	0.874788	0.383967	-0.672987	1.73251	4 months	Formulafeeding		Dietary	ENS
11	older_siblingsyes	0.926535	0.465783	1.9892	0.0496495	0.00144952	1.85162	4 months	Older siblings	*	Environmental	ENS
11	sexmale	0.666695	0.446256	1.49397	0.138605	-0.219609	1.553	4 months	Sex		Perinatal	ENS
11	smoke_before_pregyes	-0.719859	0.573538	-1.25512	0.212614	-1.85896	0.419237	4 months	Prenatal smoking		Parental	ENS
11	twins.siblings_in_luckiyes	-0.648196	0.57018	-1.13683	0.258564	-1.78062	0.484232	4 months	Siblings in cohort		Environmental	ENS
12	(Intercept)	5.47297	1.0832	5.0526	2.16901e-06	3.32195	7.62399	4 months	NA	***	NA	ENS
12	ageintrosolids	-0.25061	0.214632	-1.16762	0.245943	-0.676827	0.175607	4 months	Compelmentary foods age		Dietary	ENS
12	atopy_fatheryes	0.446051	0.430824	1.03534	0.303193	-0.40948	1.30158	4 months	Father's atopy		Parental	ENS
12	breastfeeding_4myes	-2.00741	0.577186	-3.47792	0.000770435	-3.15358	-0.86123	4 months	Breastfeeding	***	Dietary	ENS
12	delivery_placehospital	-0.69902	0.654042	-1.06877	0.28794	-1.99782	0.599777	4 months	Delivery place		Perinatal	ENS
12	formulafeeding_4myes	0.556387	0.602411	0.923601	0.358084	-0.639882	1.75266	4 months	Formulafeeding		Dietary	ENS
12	older_siblingsyes	0.951698	0.462815	2.05632	0.0425531	0.0326387	1.87076	4 months	Older siblings	*	Environmental	ENS
12	sexmale	0.733806	0.433224	1.69382	0.0936456	-0.126492	1.5941	4 months	Sex		Perinatal	ENS
12	smoke_before_pregyes	-0.736116	0.571271	-1.28856	0.200748	-1.87055	0.398316	4 months	Prenatal smoking		Parental	ENS
12	twins.siblings_in_luckiyes	-0.727468	0.555723	-1.30905	0.193743	-1.83102	0.376087	4 months	Siblings in cohort		Environmental	ENS
13	(Intercept)	6.0425	0.889854	6.79044	9.99373e-10	4.27567	7.80932	4 months	NA	***	NA	ENS
13	ageintrosolids	-0.319435	0.201124	-1.58825	0.115588	-0.71877	0.079901	4 months	Compelmentary foods age		Dietary	ENS
13	atopy_fatheryes	0.409152	0.428632	0.954554	0.342252	-0.441906	1.26021	4 months	Father's atopy		Parental	ENS
13	breastfeeding_4myes	-2.32067	0.466654	-4.97299	2.96247e-06	-3.24722	-1.39411	4 months	Breastfeeding	***	Dietary	ENS
13	delivery_placehospital	-0.676235	0.653065	-1.03548	0.303102	-1.97291	0.620441	4 months	Delivery place		Perinatal	ENS
13	older_siblingsyes	0.92649	0.461649	2.00692	0.0476307	0.00987652	1.8431	4 months	Older siblings	*	Environmental	ENS
13	sexmale	0.641681	0.421256	1.52326	0.131051	-0.194732	1.47809	4 months	Sex		Perinatal	ENS
13	smoke_before_pregyes	-0.668482	0.566115	-1.18082	0.240653	-1.79252	0.455554	4 months	Prenatal smoking		Parental	ENS
13	twins.siblings_in_luckiyes	-0.72542	0.555284	-1.3064	0.194606	-1.82795	0.377109	4 months	Siblings in cohort		Environmental	ENS
14	(Intercept)	6.331	0.836565	7.56785	2.42385e-11	4.6702	7.99179	4 months	NA	***	NA	ENS
14	ageintrosolids	-0.327684	0.200844	-1.63154	0.106088	-0.72641	0.0710412	4 months	Compelmentary foods age		Dietary	ENS
14	breastfeeding_4myes	-2.30124	0.465991	-4.93837	3.36646e-06	-3.22635	-1.37613	4 months	Breastfeeding	***	Dietary	ENS
14	delivery_placehospital	-0.743598	0.648937	-1.14587	0.254727	-2.0319	0.544706	4 months	Delivery place		Perinatal	ENS
14	older_siblingsyes	0.842618	0.452998	1.86009	0.0659662	-0.056696	1.74193	4 months	Older siblings		Environmental	ENS
14	sexmale	0.617248	0.420281	1.46866	0.14523	-0.217115	1.45161	4 months	Sex		Perinatal	ENS
14	smoke_before_pregyes	-0.68311	0.565643	-1.20767	0.230172	-1.80605	0.439834	4 months	Prenatal smoking		Parental	ENS
14	twins.siblings_in_luckiyes	-0.674099	0.552416	-1.22027	0.225381	-1.77078	0.422586	4 months	Siblings in cohort		Environmental	ENS
15	(Intercept)	5.56824	0.507518	10.9715	1.23807e-18	4.56082	6.57565	4 months	NA	***	NA	ENS
15	ageintrosolids	-0.360241	0.199148	-1.80891	0.0735953	-0.755546	0.035065	4 months	Compelmentary foods age		Dietary	ENS
15	breastfeeding_4myes	-2.23227	0.462841	-4.82297	5.30869e-06	-3.151	-1.31354	4 months	Breastfeeding	***	Dietary	ENS
15	older_siblingsyes	0.941661	0.4454	2.11419	0.03709	0.0575502	1.82577	4 months	Older siblings	*	Environmental	ENS
15	sexmale	0.658887	0.419389	1.57106	0.119458	-0.173594	1.49137	4 months	Sex		Perinatal	ENS
15	smoke_before_pregyes	-0.686538	0.566557	-1.21177	0.228574	-1.81114	0.438069	4 months	Prenatal smoking		Parental	ENS
15	twins.siblings_in_luckiyes	-0.6245	0.551615	-1.13213	0.260399	-1.71945	0.470446	4 months	Siblings in cohort		Environmental	ENS
16	(Intercept)	5.47784	0.501925	10.9137	1.44613e-18	4.48166	6.47402	4 months	NA	***	NA	ENS
16	ageintrosolids	-0.33289	0.197964	-1.68157	0.0958694	-0.725795	0.0600136	4 months	Compelmentary foods age		Dietary	ENS
16	breastfeeding_4myes	-2.22598	0.463479	-4.80277	5.69207e-06	-3.14586	-1.30611	4 months	Breastfeeding	***	Dietary	ENS
16	older_siblingsyes	0.840597	0.436995	1.92358	0.0573388	-0.0267177	1.70791	4 months	Older siblings		Environmental	ENS
16	sexmale	0.652919	0.419964	1.5547	0.123274	-0.180594	1.48643	4 months	Sex		Perinatal	ENS
16	smoke_before_pregyes	-0.615275	0.563866	-1.09117	0.277901	-1.73439	0.503844	4 months	Prenatal smoking		Parental	ENS
17	(Intercept)	5.29925	0.474954	11.1574	3.80215e-19	4.35672	6.24179	4 months	NA	***	NA	ENS
17	ageintrosolids	-0.317134	0.197629	-1.60469	0.111779	-0.709321	0.0750542	4 months	Compelmentary foods age		Dietary	ENS
17	breastfeeding_4myes	-2.13309	0.456037	-4.67746	9.30341e-06	-3.03808	-1.2281	4 months	Breastfeeding	***	Dietary	ENS
17	older_siblingsyes	0.820465	0.43703	1.87737	0.0634421	-0.0468066	1.68774	4 months	Older siblings		Environmental	ENS
17	sexmale	0.684628	0.419365	1.63253	0.105776	-0.147589	1.51684	4 months	Sex		Perinatal	ENS
1	(Intercept)	5.35553	1.95055	2.74565	0.00777359	1.46114	9.24993	5 months	NA	**	NA	ENS
1	ageintrosolids	-0.194205	0.4015	-0.483697	0.630202	-0.995826	0.607417	5 months	Compelmentary foods age		Dietary	ENS
1	atopy_fatheryes	0.750244	0.693703	1.08151	0.283407	-0.634778	2.13527	5 months	Father's atopy		Parental	ENS
1	atopy_motheryes	-0.530933	0.716029	-0.741497	0.461023	-1.96053	0.898665	5 months	Mother's atopy		Parental	ENS
1	birthweight	0.407241	0.476073	0.855416	0.395416	-0.54327	1.35775	5 months	Birth weight		Perinatal	ENS
1	breastfeeding_5myes	-2.17543	1.12477	-1.9341	0.0573898	-4.42111	0.0702549	5 months	Breastfeeding		Dietary	ENS
1	covid_270220yes	-0.387014	0.780023	-0.496157	0.621432	-1.94438	1.17035	5 months	Collected during pandemic		Environmental	ENS
1	daycare_6myes	-0.227128	0.749435	-0.303066	0.762793	-1.72342	1.26917	5 months	Daycare		Environmental	ENS
1	delivery_placehospital	-0.077547	0.977514	-0.0793308	0.93701	-2.02922	1.87412	5 months	Delivery place		Perinatal	ENS
1	delivery_typevaginal	0.687491	1.05801	0.649793	0.518081	-1.4249	2.79989	5 months	Delivery type		Perinatal	ENS
1	formulafeeding_5myes	-0.24805	1.14831	-0.216013	0.829644	-2.54073	2.04463	5 months	Formulafeeding		Dietary	ENS
1	furrypet_home_yn_6myes	-0.268413	0.767401	-0.349769	0.727626	-1.80058	1.26375	5 months	Pets		Environmental	ENS
1	hospitalyes	0.864374	0.761963	1.13441	0.260728	-0.656933	2.38568	5 months	Hospitalisation		Perinatal	ENS
1	mat_AB_use_final_deliveryyes	-0.25919	1.18634	-0.218479	0.82773	-2.62779	2.10941	5 months	Intrapartum antibiotics		Parental	ENS
1	mat_AB_use_final_pregyes	-0.0614935	1.08997	-0.0564176	0.95518	-2.23769	2.1147	5 months	Antepartum antibiotics		Parental	ENS
1	mat_weightgain	0.388723	0.325517	1.19417	0.236686	-0.261193	1.03864	5 months	Maternal weight gain		Parental	ENS
1	older_siblingsyes	0.740707	0.806848	0.918026	0.361948	-0.870216	2.35163	5 months	Older siblings		Environmental	ENS
1	pregn_weeks	-0.291189	0.441977	-0.658833	0.512295	-1.17362	0.591246	5 months	Gestational age		Perinatal	ENS
1	sexmale	0.469967	0.678154	0.693009	0.490736	-0.884012	1.82395	5 months	Sex		Perinatal	ENS
1	smoke_before_pregyes	-0.504836	0.961661	-0.524963	0.601368	-2.42485	1.41518	5 months	Prenatal smoking		Parental	ENS
1	twins.siblings_in_luckiyes	0.0963497	1.04571	0.0921385	0.926867	-1.99147	2.18417	5 months	Siblings in cohort		Environmental	ENS
2	(Intercept)	5.35593	1.93597	2.76653	0.00731546	1.49171	9.22014	5 months	NA	**	NA	ENS
2	ageintrosolids	-0.194681	0.398414	-0.488641	0.626692	-0.989919	0.600557	5 months	Compelmentary foods age		Dietary	ENS
2	atopy_fatheryes	0.747295	0.686565	1.08846	0.280294	-0.623094	2.11768	5 months	Father's atopy		Parental	ENS
2	atopy_motheryes	-0.535717	0.705683	-0.759147	0.450427	-1.94427	0.872832	5 months	Mother's atopy		Parental	ENS
2	birthweight	0.409528	0.470802	0.869853	0.387486	-0.530196	1.34925	5 months	Birth weight		Perinatal	ENS
2	breastfeeding_5myes	-2.17511	1.11636	-1.94839	0.0555582	-4.40338	0.0531572	5 months	Breastfeeding		Dietary	ENS
2	covid_270220yes	-0.399585	0.74194	-0.538567	0.59197	-1.8805	1.08133	5 months	Collected during pandemic		Environmental	ENS
2	daycare_6myes	-0.225268	0.743119	-0.303139	0.762723	-1.70854	1.258	5 months	Daycare		Environmental	ENS
2	delivery_placehospital	-0.0920079	0.936266	-0.0982712	0.92201	-1.9608	1.77679	5 months	Delivery place		Perinatal	ENS
2	delivery_typevaginal	0.693146	1.04539	0.663049	0.509574	-1.39346	2.77976	5 months	Delivery type		Perinatal	ENS
2	formulafeeding_5myes	-0.238108	1.12624	-0.211419	0.833202	-2.48608	2.00987	5 months	Formulafeeding		Dietary	ENS
2	furrypet_home_yn_6myes	-0.271783	0.75936	-0.35791	0.721536	-1.78747	1.24391	5 months	Pets		Environmental	ENS
2	hospitalyes	0.870011	0.749744	1.16041	0.249999	-0.626483	2.36651	5 months	Hospitalisation		Perinatal	ENS
2	mat_AB_use_final_deliveryyes	-0.253309	1.17293	-0.215963	0.829673	-2.59448	2.08786	5 months	Intrapartum antibiotics		Parental	ENS
2	mat_weightgain	0.388896	0.323072	1.20374	0.232924	-0.255959	1.03375	5 months	Maternal weight gain		Parental	ENS
2	older_siblingsyes	0.734326	0.792916	0.926109	0.357713	-0.84834	2.31699	5 months	Older siblings		Environmental	ENS
2	pregn_weeks	-0.290413	0.438464	-0.662341	0.510025	-1.16559	0.584765	5 months	Gestational age		Perinatal	ENS
2	sexmale	0.467713	0.671922	0.696082	0.488785	-0.873449	1.80887	5 months	Sex		Perinatal	ENS
2	smoke_before_pregyes	-0.503234	0.954064	-0.527463	0.599614	-2.40755	1.40109	5 months	Prenatal smoking		Parental	ENS
2	twins.siblings_in_luckiyes	0.104702	1.02744	0.101906	0.919136	-1.94608	2.15549	5 months	Siblings in cohort		Environmental	ENS
3	(Intercept)	5.27502	1.73939	3.03268	0.00342947	1.80412	8.74593	5 months	NA	**	NA	ENS
3	ageintrosolids	-0.201606	0.389267	-0.517912	0.606201	-0.978377	0.575165	5 months	Compelmentary foods age		Dietary	ENS
3	atopy_fatheryes	0.753596	0.678569	1.11057	0.270667	-0.600467	2.10766	5 months	Father's atopy		Parental	ENS
3	atopy_motheryes	-0.541928	0.69771	-0.776724	0.440015	-1.93419	0.85033	5 months	Mother's atopy		Parental	ENS
3	birthweight	0.401397	0.460086	0.872439	0.386039	-0.51669	1.31948	5 months	Birth weight		Perinatal	ENS
3	breastfeeding_5myes	-2.16571	1.10413	-1.96147	0.0539202	-4.36896	0.0375403	5 months	Breastfeeding		Dietary	ENS
3	covid_270220yes	-0.393484	0.733935	-0.536129	0.593619	-1.85803	1.07106	5 months	Collected during pandemic		Environmental	ENS
3	daycare_6myes	-0.227788	0.737248	-0.308971	0.758288	-1.69894	1.24337	5 months	Daycare		Environmental	ENS
3	delivery_typevaginal	0.698966	1.03608	0.674622	0.502203	-1.36851	2.76644	5 months	Delivery type		Perinatal	ENS
3	formulafeeding_5myes	-0.250079	1.11144	-0.225004	0.822651	-2.46793	1.96777	5 months	Formulafeeding		Dietary	ENS
3	furrypet_home_yn_6myes	-0.282795	0.745558	-0.379306	0.705643	-1.77053	1.20494	5 months	Pets		Environmental	ENS
3	hospitalyes	0.863581	0.741424	1.16476	0.248186	-0.615908	2.34307	5 months	Hospitalisation		Perinatal	ENS
3	mat_AB_use_final_deliveryyes	-0.258885	1.16299	-0.222603	0.824512	-2.5796	2.06183	5 months	Intrapartum antibiotics		Parental	ENS
3	mat_weightgain	0.390627	0.320234	1.21982	0.226748	-0.24839	1.02964	5 months	Maternal weight gain		Parental	ENS
3	older_siblingsyes	0.750048	0.770932	0.972912	0.334045	-0.788322	2.28842	5 months	Older siblings		Environmental	ENS
3	pregn_weeks	-0.283516	0.429648	-0.65988	0.51156	-1.14086	0.573833	5 months	Gestational age		Perinatal	ENS
3	sexmale	0.469625	0.666731	0.704369	0.483609	-0.860817	1.80007	5 months	Sex		Perinatal	ENS
3	smoke_before_pregyes	-0.500563	0.946707	-0.528741	0.598707	-2.38969	1.38856	5 months	Prenatal smoking		Parental	ENS
3	twins.siblings_in_luckiyes	0.107815	1.01945	0.105758	0.916086	-1.92646	2.14209	5 months	Siblings in cohort		Environmental	ENS
4	(Intercept)	5.32212	1.66932	3.1882	0.00215275	1.99192	8.65232	5 months	NA	**	NA	ENS
4	ageintrosolids	-0.2067	0.383498	-0.538985	0.591632	-0.971758	0.558358	5 months	Compelmentary foods age		Dietary	ENS
4	atopy_fatheryes	0.76407	0.666475	1.14643	0.255576	-0.565511	2.09365	5 months	Father's atopy		Parental	ENS
4	atopy_motheryes	-0.559231	0.673378	-0.830487	0.409128	-1.90258	0.78412	5 months	Mother's atopy		Parental	ENS
4	birthweight	0.389576	0.443093	0.87922	0.382334	-0.49437	1.27352	5 months	Birth weight		Perinatal	ENS
4	breastfeeding_5myes	-2.20449	1.03398	-2.13204	0.0365658	-4.26722	-0.141753	5 months	Breastfeeding	*	Dietary	ENS
4	covid_270220yes	-0.391753	0.728475	-0.537771	0.592465	-1.84502	1.06152	5 months	Collected during pandemic		Environmental	ENS
4	daycare_6myes	-0.209876	0.71237	-0.294617	0.769171	-1.63102	1.21126	5 months	Daycare		Environmental	ENS
4	delivery_typevaginal	0.681271	1.01513	0.671115	0.504388	-1.34386	2.7064	5 months	Delivery type		Perinatal	ENS
4	formulafeeding_5myes	-0.276108	1.07606	-0.256592	0.798257	-2.42279	1.87057	5 months	Formulafeeding		Dietary	ENS
4	furrypet_home_yn_6myes	-0.268447	0.727839	-0.368827	0.713386	-1.72045	1.18355	5 months	Pets		Environmental	ENS
4	hospitalyes	0.882985	0.7132	1.23806	0.21989	-0.53981	2.30578	5 months	Hospitalisation		Perinatal	ENS
4	mat_AB_use_final_deliveryyes	-0.258441	1.15462	-0.223832	0.823549	-2.56185	2.04496	5 months	Intrapartum antibiotics		Parental	ENS
4	mat_weightgain	0.38663	0.315709	1.22464	0.224875	-0.243192	1.01645	5 months	Maternal weight gain		Parental	ENS
4	older_siblingsyes	0.774933	0.728867	1.0632	0.291397	-0.679118	2.22898	5 months	Older siblings		Environmental	ENS
4	pregn_weeks	-0.284687	0.426416	-0.667626	0.506599	-1.13536	0.565991	5 months	Gestational age		Perinatal	ENS
4	sexmale	0.472613	0.661342	0.714627	0.477251	-0.846729	1.79195	5 months	Sex		Perinatal	ENS
4	smoke_before_pregyes	-0.528966	0.901284	-0.586903	0.559184	-2.32698	1.26905	5 months	Prenatal smoking		Parental	ENS
5	(Intercept)	5.31497	1.65765	3.20633	0.00202718	2.00889	8.62105	5 months	NA	**	NA	ENS
5	ageintrosolids	-0.2345	0.36036	-0.650737	0.517346	-0.953214	0.484215	5 months	Compelmentary foods age		Dietary	ENS
5	atopy_fatheryes	0.751122	0.65944	1.13903	0.258573	-0.564088	2.06633	5 months	Father's atopy		Parental	ENS
5	atopy_motheryes	-0.583962	0.659729	-0.885153	0.379104	-1.89975	0.731827	5 months	Mother's atopy		Parental	ENS
5	birthweight	0.385876	0.43977	0.87745	0.383244	-0.491217	1.26297	5 months	Birth weight		Perinatal	ENS
5	breastfeeding_5myes	-2.19607	1.02626	-2.13987	0.0358522	-4.24288	-0.149257	5 months	Breastfeeding	*	Dietary	ENS
5	covid_270220yes	-0.40653	0.720539	-0.564203	0.57442	-1.8436	1.03054	5 months	Collected during pandemic		Environmental	ENS
5	daycare_6myes	-0.251177	0.683374	-0.367554	0.714315	-1.61412	1.11177	5 months	Daycare		Environmental	ENS
5	delivery_typevaginal	0.730152	0.984615	0.74156	0.460834	-1.2336	2.6939	5 months	Delivery type		Perinatal	ENS
5	formulafeeding_5myes	-0.286693	1.0677	-0.268514	0.789093	-2.41615	1.84277	5 months	Formulafeeding		Dietary	ENS
5	furrypet_home_yn_6myes	-0.286221	0.718569	-0.398321	0.691606	-1.71936	1.14692	5 months	Pets		Environmental	ENS
5	hospitalyes	0.856672	0.698656	1.22617	0.224243	-0.536753	2.2501	5 months	Hospitalisation		Perinatal	ENS
5	mat_weightgain	0.389165	0.313358	1.24192	0.218411	-0.235807	1.01414	5 months	Maternal weight gain		Parental	ENS
5	older_siblingsyes	0.772113	0.723797	1.06675	0.289749	-0.671455	2.21568	5 months	Older siblings		Environmental	ENS
5	pregn_weeks	-0.280761	0.423155	-0.663496	0.509193	-1.12472	0.563195	5 months	Gestational age		Perinatal	ENS
5	sexmale	0.490582	0.651982	0.752447	0.454305	-0.809756	1.79092	5 months	Sex		Perinatal	ENS
5	smoke_before_pregyes	-0.520773	0.894409	-0.582254	0.562266	-2.30462	1.26307	5 months	Prenatal smoking		Parental	ENS
6	(Intercept)	5.03053	1.26664	3.97156	0.000169188	2.50492	7.55613	5 months	NA	***	NA	ENS
6	ageintrosolids	-0.215046	0.350688	-0.613213	0.541695	-0.914298	0.484205	5 months	Compelmentary foods age		Dietary	ENS
6	atopy_fatheryes	0.790919	0.638356	1.23899	0.219428	-0.481926	2.06376	5 months	Father's atopy		Parental	ENS
6	atopy_motheryes	-0.573568	0.654275	-0.876646	0.383635	-1.87815	0.731019	5 months	Mother's atopy		Parental	ENS
6	birthweight	0.369836	0.432837	0.854446	0.395732	-0.493217	1.23289	5 months	Birth weight		Perinatal	ENS
6	breastfeeding_5myes	-2.00032	0.717585	-2.78757	0.0068089	-3.43114	-0.569493	5 months	Breastfeeding	**	Dietary	ENS
6	covid_270220yes	-0.424542	0.712706	-0.595676	0.553286	-1.84564	0.996554	5 months	Collected during pandemic		Environmental	ENS
6	daycare_6myes	-0.24938	0.678862	-0.36735	0.714451	-1.60299	1.10423	5 months	Daycare		Environmental	ENS
6	delivery_typevaginal	0.746098	0.976379	0.764148	0.447311	-1.20075	2.69294	5 months	Delivery type		Perinatal	ENS
6	furrypet_home_yn_6myes	-0.317327	0.70452	-0.450415	0.653783	-1.7221	1.08745	5 months	Pets		Environmental	ENS
6	hospitalyes	0.829028	0.686499	1.20762	0.231202	-0.539811	2.19787	5 months	Hospitalisation		Perinatal	ENS
6	mat_weightgain	0.404315	0.306216	1.32036	0.190955	-0.206261	1.01489	5 months	Maternal weight gain		Parental	ENS
6	older_siblingsyes	0.757228	0.71694	1.05619	0.29446	-0.672309	2.18677	5 months	Older siblings		Environmental	ENS
6	pregn_weeks	-0.27894	0.420327	-0.663625	0.509079	-1.11705	0.559168	5 months	Gestational age		Perinatal	ENS
6	sexmale	0.509985	0.643718	0.792249	0.430855	-0.773552	1.79352	5 months	Sex		Perinatal	ENS
6	smoke_before_pregyes	-0.567526	0.871546	-0.651172	0.517038	-2.30534	1.17029	5 months	Prenatal smoking		Parental	ENS
7	(Intercept)	4.9381	1.08321	4.55876	1.82664e-05	2.78244	7.09376	5 months	NA	***	NA	ENS
7	ageintrosolids	-0.149743	0.322713	-0.464013	0.643899	-0.791961	0.492476	5 months	Compelmentary foods age		Dietary	ENS
7	atopy_fatheryes	0.686025	0.591748	1.15932	0.249775	-0.491592	1.86364	5 months	Father's atopy		Parental	ENS
7	atopy_motheryes	-0.746847	0.5948	-1.25563	0.212906	-1.93054	0.436843	5 months	Mother's atopy		Parental	ENS
7	birthweight	0.309512	0.408792	0.757138	0.451191	-0.50401	1.12303	5 months	Birth weight		Perinatal	ENS
7	breastfeeding_5myes	-2.02325	0.652181	-3.10228	0.00265331	-3.32113	-0.725365	5 months	Breastfeeding	**	Dietary	ENS
7	covid_270220yes	-0.597432	0.640592	-0.932624	0.35382	-1.87225	0.677387	5 months	Collected during pandemic		Environmental	ENS
7	delivery_typevaginal	0.783085	0.894666	0.875281	0.384041	-0.997358	2.56353	5 months	Delivery type		Perinatal	ENS
7	furrypet_home_yn_6myes	-0.374517	0.638633	-0.586436	0.559234	-1.64544	0.896403	5 months	Pets		Environmental	ENS
7	hospitalyes	1.03517	0.639215	1.61944	0.109289	-0.236911	2.30725	5 months	Hospitalisation		Perinatal	ENS
7	mat_weightgain	0.39689	0.28894	1.37361	0.173401	-0.178119	0.971898	5 months	Maternal weight gain		Parental	ENS
7	older_siblingsyes	0.698508	0.636738	1.09701	0.275928	-0.56864	1.96566	5 months	Older siblings		Environmental	ENS
7	pregn_weeks	-0.174563	0.387245	-0.450782	0.653366	-0.945206	0.59608	5 months	Gestational age		Perinatal	ENS
7	sexmale	0.605581	0.586086	1.03326	0.304594	-0.560768	1.77193	5 months	Sex		Perinatal	ENS
7	smoke_before_pregyes	-0.605841	0.822423	-0.736654	0.463487	-2.24251	1.03083	5 months	Prenatal smoking		Parental	ENS
8	(Intercept)	5.03629	1.05585	4.76988	8.0295e-06	2.93547	7.13711	5 months	NA	***	NA	ENS
8	ageintrosolids	-0.148856	0.321115	-0.46356	0.644206	-0.787775	0.490063	5 months	Compelmentary foods age		Dietary	ENS
8	atopy_fatheryes	0.673373	0.588168	1.14487	0.255637	-0.496897	1.84364	5 months	Father's atopy		Parental	ENS
8	atopy_motheryes	-0.773127	0.589017	-1.31257	0.193035	-1.94509	0.398833	5 months	Mother's atopy		Parental	ENS
8	birthweight	0.190341	0.310266	0.613475	0.541281	-0.426991	0.807672	5 months	Birth weight		Perinatal	ENS
8	breastfeeding_5myes	-2.01248	0.64853	-3.10314	0.00263657	-3.30286	-0.722111	5 months	Breastfeeding	**	Dietary	ENS
8	covid_270220yes	-0.543833	0.626357	-0.868248	0.387824	-1.79009	0.702421	5 months	Collected during pandemic		Environmental	ENS
8	delivery_typevaginal	0.636492	0.829362	0.767448	0.445047	-1.01368	2.28666	5 months	Delivery type		Perinatal	ENS
8	furrypet_home_yn_6myes	-0.391392	0.634391	-0.616957	0.538994	-1.65363	0.870848	5 months	Pets		Environmental	ENS
8	hospitalyes	1.05915	0.633857	1.67096	0.0985899	-0.202029	2.32033	5 months	Hospitalisation		Perinatal	ENS
8	mat_weightgain	0.378897	0.284759	1.33059	0.187058	-0.187683	0.945477	5 months	Maternal weight gain		Parental	ENS
8	older_siblingsyes	0.721677	0.631531	1.14274	0.256512	-0.534872	1.97823	5 months	Older siblings		Environmental	ENS
8	sexmale	0.637529	0.578917	1.10124	0.274052	-0.514334	1.78939	5 months	Sex		Perinatal	ENS
8	smoke_before_pregyes	-0.6814	0.80119	-0.850485	0.397563	-2.27552	0.912717	5 months	Prenatal smoking		Parental	ENS
9	(Intercept)	5.00848	1.04909	4.77412	7.77835e-06	2.9215	7.09545	5 months	NA	***	NA	ENS
9	atopy_fatheryes	0.705492	0.58127	1.21371	0.228343	-0.450839	1.86182	5 months	Father's atopy		Parental	ENS
9	atopy_motheryes	-0.776704	0.586141	-1.32511	0.188814	-1.94272	0.389317	5 months	Mother's atopy		Parental	ENS
9	birthweight	0.182556	0.308325	0.592092	0.555418	-0.430799	0.795912	5 months	Birth weight		Perinatal	ENS
9	breastfeeding_5myes	-2.13592	0.588507	-3.62938	0.00049291	-3.30665	-0.96519	5 months	Breastfeeding	***	Dietary	ENS
9	covid_270220yes	-0.514948	0.620259	-0.830215	0.408828	-1.74884	0.718945	5 months	Collected during pandemic		Environmental	ENS
9	delivery_typevaginal	0.689771	0.817418	0.843842	0.401213	-0.936334	2.31588	5 months	Delivery type		Perinatal	ENS
9	furrypet_home_yn_6myes	-0.349592	0.624937	-0.559404	0.577411	-1.59279	0.893606	5 months	Pets		Environmental	ENS
9	hospitalyes	1.09846	0.625145	1.75712	0.0826292	-0.145155	2.34207	5 months	Hospitalisation		Perinatal	ENS
9	mat_weightgain	0.37291	0.2831	1.31724	0.191429	-0.190267	0.936087	5 months	Maternal weight gain		Parental	ENS
9	older_siblingsyes	0.723561	0.628487	1.15127	0.252965	-0.5267	1.97382	5 months	Older siblings		Environmental	ENS
9	sexmale	0.623955	0.575401	1.08438	0.281373	-0.520701	1.76861	5 months	Sex		Perinatal	ENS
9	smoke_before_pregyes	-0.67422	0.797197	-0.845738	0.40016	-2.2601	0.911658	5 months	Prenatal smoking		Parental	ENS
10	(Intercept)	4.84877	1.00397	4.82957	6.07657e-06	2.85225	6.84528	5 months	NA	***	NA	ENS
10	atopy_fatheryes	0.706777	0.570991	1.23781	0.219236	-0.428701	1.84226	5 months	Father's atopy		Parental	ENS
10	atopy_motheryes	-0.70993	0.570673	-1.24402	0.216952	-1.84478	0.424917	5 months	Mother's atopy		Parental	ENS
10	birthweight	0.176275	0.300512	0.586583	0.559057	-0.421326	0.773877	5 months	Birth weight		Perinatal	ENS
10	breastfeeding_5myes	-2.10946	0.573065	-3.68101	0.000409509	-3.24906	-0.969856	5 months	Breastfeeding	***	Dietary	ENS
10	covid_270220yes	-0.502934	0.612548	-0.821053	0.41394	-1.72105	0.715184	5 months	Collected during pandemic		Environmental	ENS
10	delivery_typevaginal	0.670078	0.802825	0.83465	0.406282	-0.926427	2.26658	5 months	Delivery type		Perinatal	ENS
10	hospitalyes	1.03502	0.605617	1.70903	0.0911378	-0.169318	2.23935	5 months	Hospitalisation		Perinatal	ENS
10	mat_weightgain	0.347087	0.276376	1.25585	0.212651	-0.202516	0.896691	5 months	Maternal weight gain		Parental	ENS
10	older_siblingsyes	0.804751	0.608789	1.32189	0.189794	-0.405893	2.01539	5 months	Older siblings		Environmental	ENS
10	sexmale	0.61591	0.559675	1.10048	0.274268	-0.497065	1.72888	5 months	Sex		Perinatal	ENS
10	smoke_before_pregyes	-0.746372	0.773245	-0.965246	0.337192	-2.28406	0.791311	5 months	Prenatal smoking		Parental	ENS
11	(Intercept)	4.90761	0.995087	4.93184	3.99354e-06	2.92911	6.88611	5 months	NA	***	NA	ENS
11	atopy_fatheryes	0.743281	0.565395	1.31462	0.192173	-0.380876	1.86744	5 months	Father's atopy		Parental	ENS
11	atopy_motheryes	-0.718963	0.56826	-1.2652	0.209257	-1.84882	0.410891	5 months	Mother's atopy		Parental	ENS
11	breastfeeding_5myes	-2.07303	0.567488	-3.653	0.000447353	-3.20135	-0.944713	5 months	Breastfeeding	***	Dietary	ENS
11	covid_270220yes	-0.487836	0.609641	-0.800203	0.425824	-1.69997	0.724293	5 months	Collected during pandemic		Environmental	ENS
11	delivery_typevaginal	0.572895	0.782507	0.732128	0.466104	-0.982938	2.12873	5 months	Delivery type		Perinatal	ENS
11	hospitalyes	0.963805	0.59103	1.63072	0.10665	-0.211322	2.13893	5 months	Hospitalisation		Perinatal	ENS
11	mat_weightgain	0.388001	0.266396	1.45649	0.148942	-0.141664	0.917667	5 months	Maternal weight gain		Parental	ENS
11	older_siblingsyes	0.789743	0.6059	1.30342	0.19595	-0.414948	1.99443	5 months	Older siblings		Environmental	ENS
11	sexmale	0.67514	0.548362	1.23119	0.221646	-0.415151	1.76543	5 months	Sex		Perinatal	ENS
11	smoke_before_pregyes	-0.783052	0.767733	-1.01995	0.310645	-2.30951	0.743408	5 months	Prenatal smoking		Parental	ENS
12	(Intercept)	5.35636	0.781785	6.85145	1.03933e-09	3.80223	6.9105	5 months	NA	***	NA	ENS
12	atopy_fatheryes	0.746932	0.563846	1.32471	0.188777	-0.373957	1.86782	5 months	Father's atopy		Parental	ENS
12	atopy_motheryes	-0.634605	0.554953	-1.14353	0.255992	-1.73782	0.468605	5 months	Mother's atopy		Parental	ENS
12	breastfeeding_5myes	-2.04312	0.564486	-3.61943	0.000497866	-3.16528	-0.920956	5 months	Breastfeeding	***	Dietary	ENS
12	covid_270220yes	-0.516346	0.606752	-0.851	0.397133	-1.72253	0.689837	5 months	Collected during pandemic		Environmental	ENS
12	hospitalyes	0.912419	0.585263	1.55899	0.122671	-0.251045	2.07588	5 months	Hospitalisation		Perinatal	ENS
12	mat_weightgain	0.347235	0.259807	1.33651	0.184909	-0.169245	0.863714	5 months	Maternal weight gain		Parental	ENS
12	older_siblingsyes	0.841074	0.600204	1.40131	0.164719	-0.352091	2.03424	5 months	Older siblings		Environmental	ENS
12	sexmale	0.653046	0.546052	1.19594	0.235007	-0.43247	1.73856	5 months	Sex		Perinatal	ENS
12	smoke_before_pregyes	-0.87355	0.75567	-1.15599	0.250885	-2.37577	0.628672	5 months	Prenatal smoking		Parental	ENS
13	(Intercept)	5.19522	0.757304	6.86016	9.57125e-10	3.69	6.70045	5 months	NA	***	NA	ENS
13	atopy_fatheryes	0.729109	0.562563	1.29605	0.198387	-0.389046	1.84726	5 months	Father's atopy		Parental	ENS
13	atopy_motheryes	-0.704019	0.548055	-1.28458	0.20235	-1.79334	0.385301	5 months	Mother's atopy		Parental	ENS
13	breastfeeding_5myes	-2.06318	0.563099	-3.66397	0.00042617	-3.1824	-0.943959	5 months	Breastfeeding	***	Dietary	ENS
13	hospitalyes	0.934184	0.583776	1.60024	0.11317	-0.226134	2.0945	5 months	Hospitalisation		Perinatal	ENS
13	mat_weightgain	0.316842	0.256933	1.23317	0.220834	-0.19384	0.827524	5 months	Maternal weight gain		Parental	ENS
13	older_siblingsyes	0.94343	0.587096	1.60694	0.111691	-0.223488	2.11035	5 months	Older siblings		Environmental	ENS
13	sexmale	0.635534	0.544799	1.16655	0.24658	-0.447312	1.71838	5 months	Sex		Perinatal	ENS
13	smoke_before_pregyes	-0.808429	0.750593	-1.07705	0.284434	-2.30031	0.683456	5 months	Prenatal smoking		Parental	ENS
14	(Intercept)	5.06714	0.748588	6.76893	1.38968e-09	3.57948	6.5548	5 months	NA	***	NA	ENS
14	atopy_fatheryes	0.740703	0.562972	1.3157	0.191692	-0.378085	1.85949	5 months	Father's atopy		Parental	ENS
14	atopy_motheryes	-0.722735	0.548278	-1.31819	0.19086	-1.81232	0.366851	5 months	Mother's atopy		Parental	ENS
14	breastfeeding_5myes	-1.93198	0.550265	-3.511	0.000706498	-3.02552	-0.838443	5 months	Breastfeeding	***	Dietary	ENS
14	hospitalyes	0.824357	0.575324	1.43286	0.155442	-0.318978	1.96769	5 months	Hospitalisation		Perinatal	ENS
14	mat_weightgain	0.319128	0.257158	1.24098	0.21791	-0.191918	0.830175	5 months	Maternal weight gain		Parental	ENS
14	older_siblingsyes	0.868868	0.58353	1.48899	0.140066	-0.290776	2.02851	5 months	Older siblings		Environmental	ENS
14	sexmale	0.643166	0.545248	1.17958	0.241344	-0.440399	1.72673	5 months	Sex		Perinatal	ENS
15	(Intercept)	5.35459	0.709368	7.5484	3.63214e-11	3.94509	6.76409	5 months	NA	***	NA	ENS
15	atopy_fatheryes	0.821897	0.559975	1.46774	0.145701	-0.290762	1.93456	5 months	Father's atopy		Parental	ENS
15	atopy_motheryes	-0.692285	0.548873	-1.26129	0.210502	-1.78288	0.398313	5 months	Mother's atopy		Parental	ENS
15	breastfeeding_5myes	-1.97214	0.550417	-3.58299	0.000553583	-3.06581	-0.878475	5 months	Breastfeeding	***	Dietary	ENS
15	hospitalyes	0.853715	0.576048	1.48202	0.141867	-0.29088	1.99831	5 months	Hospitalisation		Perinatal	ENS
15	mat_weightgain	0.304398	0.257418	1.1825	0.240156	-0.207087	0.815883	5 months	Maternal weight gain		Parental	ENS
15	older_siblingsyes	0.843882	0.584427	1.44395	0.152265	-0.317361	2.00513	5 months	Older siblings		Environmental	ENS
16	(Intercept)	5.22819	0.702818	7.4389	5.7527e-11	3.83192	6.62446	5 months	NA	***	NA	ENS
16	atopy_fatheryes	0.774483	0.559772	1.38357	0.169913	-0.337602	1.88657	5 months	Father's atopy		Parental	ENS
16	atopy_motheryes	-0.639841	0.548287	-1.16698	0.246301	-1.72911	0.449427	5 months	Mother's atopy		Parental	ENS
16	breastfeeding_5myes	-1.95095	0.551342	-3.53856	0.000638815	-3.04629	-0.855618	5 months	Breastfeeding	***	Dietary	ENS
16	hospitalyes	0.978729	0.567515	1.72459	0.088035	-0.148739	2.1062	5 months	Hospitalisation		Perinatal	ENS
16	older_siblingsyes	0.982811	0.573761	1.71293	0.0901692	-0.157066	2.12269	5 months	Older siblings		Environmental	ENS
17	(Intercept)	4.82087	0.611233	7.88713	6.5553e-12	3.60673	6.03501	5 months	NA	***	NA	ENS
17	atopy_fatheryes	0.82481	0.559217	1.47494	0.143681	-0.286006	1.93563	5 months	Father's atopy		Parental	ENS
17	breastfeeding_5myes	-1.98364	0.551723	-3.59536	0.000525872	-3.07957	-0.887712	5 months	Breastfeeding	***	Dietary	ENS
17	hospitalyes	1.00488	0.568199	1.76853	0.0803233	-0.12378	2.13354	5 months	Hospitalisation		Perinatal	ENS
17	older_siblingsyes	1.06603	0.570443	1.86878	0.0648706	-0.0670838	2.19915	5 months	Older siblings		Environmental	ENS
1	(Intercept)	9.05712	2.24771	4.02948	0.000155212	4.564	13.5502	6 months	NA	***	NA	ENS
1	ageintrosolids	-0.014007	0.428376	-0.032698	0.97402	-0.870318	0.842304	6 months	Compelmentary foods age		Dietary	ENS
1	atopy_fatheryes	0.373637	0.756617	0.493826	0.623174	-1.13882	1.88609	6 months	Father's atopy		Parental	ENS
1	atopy_motheryes	-1.47811	0.73037	-2.02378	0.0473078	-2.9381	-0.018121	6 months	Mother's atopy	*	Parental	ENS
1	birthweight	0.151436	0.503949	0.300498	0.764803	-0.855944	1.15882	6 months	Birth weight		Perinatal	ENS
1	breastfeeding_6myes	-2.0438	1.07255	-1.90555	0.0613475	-4.18778	0.100194	6 months	Breastfeeding		Dietary	ENS
1	covid_270220yes	0.300782	0.767307	0.391997	0.696405	-1.23304	1.83461	6 months	Collected during pandemic		Environmental	ENS
1	daycare_6myes	1.65922	0.801023	2.07138	0.0424916	0.0579975	3.26044	6 months	Daycare	*	Environmental	ENS
1	delivery_placehospital	-1.64168	1.14506	-1.43371	0.156679	-3.93063	0.647258	6 months	Delivery place		Perinatal	ENS
1	delivery_typevaginal	-1.04367	1.15068	-0.906996	0.367921	-3.34385	1.25652	6 months	Delivery type		Perinatal	ENS
1	formulafeeding_6myes	0.9439	1.18309	0.797827	0.428016	-1.42106	3.30886	6 months	Formulafeeding		Dietary	ENS
1	furrypet_home_yn_6myes	-0.143879	0.730048	-0.197082	0.844408	-1.60322	1.31547	6 months	Pets		Environmental	ENS
1	hospitalyes	0.268911	0.776199	0.346446	0.730181	-1.28269	1.82051	6 months	Hospitalisation		Perinatal	ENS
1	mat_AB_use_final_deliveryyes	-1.36548	1.2232	-1.11632	0.268594	-3.81062	1.07966	6 months	Intrapartum antibiotics		Parental	ENS
1	mat_AB_use_final_pregyes	0.171358	1.16448	0.147155	0.883487	-2.1564	2.49911	6 months	Antepartum antibiotics		Parental	ENS
1	mat_weightgain	1.58602	0.693822	2.28592	0.0256888	0.199091	2.97295	6 months	Maternal weight gain	*	Parental	ENS
1	older_siblingsyes	0.393497	0.847925	0.46407	0.644223	-1.30148	2.08847	6 months	Older siblings		Environmental	ENS
1	pregn_weeks	-0.452549	0.444589	-1.0179	0.31268	-1.34127	0.436173	6 months	Gestational age		Perinatal	ENS
1	sexmale	0.136654	0.694025	0.196901	0.844549	-1.25068	1.52399	6 months	Sex		Perinatal	ENS
1	smoke_before_pregyes	-1.6433	0.854996	-1.922	0.0592038	-3.35242	0.0658075	6 months	Prenatal smoking		Parental	ENS
1	twins.siblings_in_luckiyes	-2.65814	1.09754	-2.42191	0.0183769	-4.8521	-0.464193	6 months	Siblings in cohort	*	Environmental	ENS
2	(Intercept)	9.05823	2.22957	4.06277	0.000136751	4.60278	13.5137	6 months	NA	***	NA	ENS
2	atopy_fatheryes	0.378907	0.733368	0.516666	0.607198	-1.08661	1.84443	6 months	Father's atopy		Parental	ENS
2	atopy_motheryes	-1.47912	0.723904	-2.04326	0.0452147	-2.92573	-0.0325166	6 months	Mother's atopy	*	Parental	ENS
2	birthweight	0.149433	0.496231	0.301135	0.764303	-0.842207	1.14107	6 months	Birth weight		Perinatal	ENS
2	breastfeeding_6myes	-2.04916	1.05147	-1.94885	0.0557701	-4.15037	0.0520422	6 months	Breastfeeding		Dietary	ENS
2	covid_270220yes	0.305708	0.746387	0.409583	0.683501	-1.18583	1.79724	6 months	Collected during pandemic		Environmental	ENS
2	daycare_6myes	1.66048	0.793733	2.09198	0.0404759	0.0743278	3.24662	6 months	Daycare	*	Environmental	ENS
2	delivery_placehospital	-1.64573	1.12929	-1.45731	0.149998	-3.90244	0.610985	6 months	Delivery place		Perinatal	ENS
2	delivery_typevaginal	-1.04731	1.13616	-0.921794	0.360153	-3.31775	1.22313	6 months	Delivery type		Perinatal	ENS
2	formulafeeding_6myes	0.954154	1.13169	0.843124	0.402349	-1.30735	3.21565	6 months	Formulafeeding		Dietary	ENS
2	furrypet_home_yn_6myes	-0.145428	0.722711	-0.201226	0.84117	-1.58965	1.29879	6 months	Pets		Environmental	ENS
2	hospitalyes	0.267287	0.768442	0.347829	0.729128	-1.26832	1.8029	6 months	Hospitalisation		Perinatal	ENS
2	mat_AB_use_final_deliveryyes	-1.37143	1.19996	-1.1429	0.257406	-3.76936	1.0265	6 months	Intrapartum antibiotics		Parental	ENS
2	mat_AB_use_final_pregyes	0.174708	1.15073	0.151824	0.879811	-2.12484	2.47426	6 months	Antepartum antibiotics		Parental	ENS
2	mat_weightgain	1.582	0.677388	2.33544	0.0227185	0.228345	2.93565	6 months	Maternal weight gain	*	Parental	ENS
2	older_siblingsyes	0.387573	0.821748	0.471644	0.63881	-1.25456	2.0297	6 months	Older siblings		Environmental	ENS
2	pregn_weeks	-0.453448	0.440206	-1.03008	0.30691	-1.33313	0.426233	6 months	Gestational age		Perinatal	ENS
2	sexmale	0.137466	0.68806	0.199788	0.84229	-1.23751	1.51244	6 months	Sex		Perinatal	ENS
2	smoke_before_pregyes	-1.64223	0.847563	-1.93759	0.0571587	-3.33595	0.0514892	6 months	Prenatal smoking		Parental	ENS
2	twins.siblings_in_luckiyes	-2.65036	1.06285	-2.49363	0.0152823	-4.77429	-0.526421	6 months	Siblings in cohort	*	Environmental	ENS
3	(Intercept)	9.05245	2.21217	4.09212	0.000122015	4.63314	13.4718	6 months	NA	***	NA	ENS
3	atopy_fatheryes	0.408639	0.701322	0.582669	0.562163	-0.992414	1.80969	6 months	Father's atopy		Parental	ENS
3	atopy_motheryes	-1.46458	0.712037	-2.05688	0.0437785	-2.88703	-0.0421178	6 months	Mother's atopy	*	Parental	ENS
3	birthweight	0.140533	0.488981	0.287399	0.774736	-0.83632	1.11739	6 months	Birth weight		Perinatal	ENS
3	breastfeeding_6myes	-2.03444	1.03897	-1.95813	0.054577	-4.11002	0.0411448	6 months	Breastfeeding		Dietary	ENS
3	covid_270220yes	0.323335	0.731653	0.441924	0.660034	-1.13831	1.78498	6 months	Collected during pandemic		Environmental	ENS
3	daycare_6myes	1.64604	0.78198	2.10497	0.0392254	0.0838564	3.20823	6 months	Daycare	*	Environmental	ENS
3	delivery_placehospital	-1.61153	1.09812	-1.46754	0.147127	-3.80526	0.582212	6 months	Delivery place		Perinatal	ENS
3	delivery_typevaginal	-1.05779	1.12538	-0.939938	0.350783	-3.30598	1.19041	6 months	Delivery type		Perinatal	ENS
3	formulafeeding_6myes	0.950847	1.12281	0.846846	0.400237	-1.29222	3.19392	6 months	Formulafeeding		Dietary	ENS
3	furrypet_home_yn_6myes	-0.145339	0.717174	-0.202655	0.840047	-1.57806	1.28738	6 months	Pets		Environmental	ENS
3	hospitalyes	0.24813	0.752204	0.32987	0.742575	-1.25457	1.75083	6 months	Hospitalisation		Perinatal	ENS
3	mat_AB_use_final_deliveryyes	-1.41202	1.16083	-1.21639	0.228303	-3.73105	0.907	6 months	Intrapartum antibiotics		Parental	ENS
3	mat_weightgain	1.5704	0.667909	2.35122	0.0218035	0.236097	2.9047	6 months	Maternal weight gain	*	Parental	ENS
3	older_siblingsyes	0.385772	0.815367	0.473126	0.637733	-1.24311	2.01465	6 months	Older siblings		Environmental	ENS
3	pregn_weeks	-0.465932	0.429144	-1.08572	0.281674	-1.32325	0.391382	6 months	Gestational age		Perinatal	ENS
3	sexmale	0.140048	0.68258	0.205175	0.838087	-1.22356	1.50366	6 months	Sex		Perinatal	ENS
3	smoke_before_pregyes	-1.64734	0.840405	-1.96018	0.0543319	-3.32624	0.0315611	6 months	Prenatal smoking		Parental	ENS
3	twins.siblings_in_luckiyes	-2.66956	1.04721	-2.54921	0.0132041	-4.7616	-0.577519	6 months	Siblings in cohort	*	Environmental	ENS
4	(Intercept)	8.99598	2.1783	4.12982	0.000105722	4.64562	13.3464	6 months	NA	***	NA	ENS
4	atopy_fatheryes	0.406827	0.696073	0.58446	0.560934	-0.983328	1.79698	6 months	Father's atopy		Parental	ENS
4	atopy_motheryes	-1.43327	0.689929	-2.07741	0.0417189	-2.81115	-0.0553837	6 months	Mother's atopy	*	Parental	ENS
4	birthweight	0.140011	0.485354	0.288473	0.773903	-0.829308	1.10933	6 months	Birth weight		Perinatal	ENS
4	breastfeeding_6myes	-2.06052	1.02334	-2.01353	0.0482026	-4.10426	-0.0167761	6 months	Breastfeeding	*	Dietary	ENS
4	covid_270220yes	0.322207	0.726215	0.44368	0.658748	-1.12814	1.77256	6 months	Collected during pandemic		Environmental	ENS
4	daycare_6myes	1.67344	0.764499	2.18894	0.032199	0.146633	3.20025	6 months	Daycare	*	Environmental	ENS
4	delivery_placehospital	-1.61599	1.08977	-1.48288	0.142939	-3.7924	0.560421	6 months	Delivery place		Perinatal	ENS
4	delivery_typevaginal	-1.05864	1.11704	-0.947718	0.346783	-3.28951	1.17224	6 months	Delivery type		Perinatal	ENS
4	formulafeeding_6myes	0.92631	1.108	0.836021	0.406206	-1.28652	3.13913	6 months	Formulafeeding		Dietary	ENS
4	hospitalyes	0.263142	0.743006	0.354158	0.724367	-1.22074	1.74703	6 months	Hospitalisation		Perinatal	ENS
4	mat_AB_use_final_deliveryyes	-1.44039	1.14383	-1.25927	0.212437	-3.72477	0.843999	6 months	Intrapartum antibiotics		Parental	ENS
4	mat_weightgain	1.55896	0.660591	2.35994	0.0212903	0.239665	2.87825	6 months	Maternal weight gain	*	Parental	ENS
4	older_siblingsyes	0.414672	0.796855	0.520386	0.604562	-1.17676	2.0061	6 months	Older siblings		Environmental	ENS
4	pregn_weeks	-0.460436	0.425115	-1.08309	0.282772	-1.30945	0.388578	6 months	Gestational age		Perinatal	ENS
4	sexmale	0.143945	0.677257	0.212541	0.83235	-1.20863	1.49652	6 months	Sex		Perinatal	ENS
4	smoke_before_pregyes	-1.6792	0.819456	-2.04917	0.0444864	-3.31577	-0.0426346	6 months	Prenatal smoking	*	Parental	ENS
4	twins.siblings_in_luckiyes	-2.69528	1.03179	-2.61222	0.0111611	-4.75592	-0.634643	6 months	Siblings in cohort	*	Environmental	ENS
5	(Intercept)	9.05698	2.14364	4.22506	7.49041e-05	4.77708	13.3369	6 months	NA	***	NA	ENS
5	atopy_fatheryes	0.414853	0.690002	0.601234	0.549744	-0.962781	1.79249	6 months	Father's atopy		Parental	ENS
5	atopy_motheryes	-1.43411	0.684909	-2.09387	0.0401167	-2.80157	-0.066644	6 months	Mother's atopy	*	Parental	ENS
5	birthweight	0.164163	0.468439	0.350446	0.72712	-0.771106	1.09943	6 months	Birth weight		Perinatal	ENS
5	breastfeeding_6myes	-2.05417	1.01547	-2.02287	0.0471411	-4.08163	-0.0267113	6 months	Breastfeeding	*	Dietary	ENS
5	covid_270220yes	0.327606	0.720501	0.454692	0.650823	-1.11092	1.76613	6 months	Collected during pandemic		Environmental	ENS
5	daycare_6myes	1.65278	0.752786	2.19555	0.0316451	0.149792	3.15576	6 months	Daycare	*	Environmental	ENS
5	delivery_placehospital	-1.62704	1.08062	-1.50565	0.136927	-3.78457	0.530488	6 months	Delivery place		Perinatal	ENS
5	delivery_typevaginal	-1.03107	1.10143	-0.936122	0.352623	-3.23014	1.168	6 months	Delivery type		Perinatal	ENS
5	formulafeeding_6myes	0.952494	1.09313	0.871342	0.386726	-1.23002	3.13501	6 months	Formulafeeding		Dietary	ENS
5	hospitalyes	0.278901	0.73393	0.38001	0.705158	-1.18644	1.74424	6 months	Hospitalisation		Perinatal	ENS
5	mat_AB_use_final_deliveryyes	-1.47402	1.12461	-1.31069	0.194504	-3.71937	0.771335	6 months	Intrapartum antibiotics		Parental	ENS
5	mat_weightgain	1.54317	0.651637	2.36814	0.0208153	0.242135	2.84421	6 months	Maternal weight gain	*	Parental	ENS
5	older_siblingsyes	0.396024	0.78626	0.503681	0.616163	-1.17379	1.96584	6 months	Older siblings		Environmental	ENS
5	pregn_weeks	-0.475299	0.41628	-1.14178	0.257672	-1.30643	0.355831	6 months	Gestational age		Perinatal	ENS
5	smoke_before_pregyes	-1.68744	0.812597	-2.0766	0.0417362	-3.30984	-0.0650342	6 months	Prenatal smoking	*	Parental	ENS
5	twins.siblings_in_luckiyes	-2.68557	1.0233	-2.62442	0.010773	-4.72866	-0.642488	6 months	Siblings in cohort	*	Environmental	ENS
6	(Intercept)	8.94929	2.10756	4.24628	6.85223e-05	4.74258	13.156	6 months	NA	***	NA	ENS
6	atopy_fatheryes	0.473437	0.665049	0.711883	0.479009	-0.854006	1.80088	6 months	Father's atopy		Parental	ENS
6	atopy_motheryes	-1.443	0.679944	-2.12223	0.0375188	-2.80017	-0.0858226	6 months	Mother's atopy	*	Parental	ENS
6	breastfeeding_6myes	-1.97069	0.980654	-2.00957	0.0485074	-3.92808	-0.0132951	6 months	Breastfeeding	*	Dietary	ENS
6	covid_270220yes	0.346315	0.713801	0.485171	0.629138	-1.07844	1.77107	6 months	Collected during pandemic		Environmental	ENS
6	daycare_6myes	1.71964	0.723427	2.37707	0.0203137	0.27567	3.1636	6 months	Daycare	*	Environmental	ENS
6	delivery_placehospital	-1.55111	1.05173	-1.47483	0.144943	-3.65037	0.548139	6 months	Delivery place		Perinatal	ENS
6	delivery_typevaginal	-1.12603	1.06057	-1.06172	0.292173	-3.24293	0.990869	6 months	Delivery type		Perinatal	ENS
6	formulafeeding_6myes	1.01706	1.07042	0.950154	0.345449	-1.1195	3.15363	6 months	Formulafeeding		Dietary	ENS
6	hospitalyes	0.238344	0.719988	0.331038	0.741649	-1.19876	1.67545	6 months	Hospitalisation		Perinatal	ENS
6	mat_AB_use_final_deliveryyes	-1.51024	1.11249	-1.35753	0.179169	-3.73078	0.710306	6 months	Intrapartum antibiotics		Parental	ENS
6	mat_weightgain	1.57257	0.641969	2.44961	0.0169216	0.291196	2.85395	6 months	Maternal weight gain	*	Parental	ENS
6	older_siblingsyes	0.414625	0.779314	0.532039	0.596459	-1.14089	1.97014	6 months	Older siblings		Environmental	ENS
6	pregn_weeks	-0.3984	0.351425	-1.13367	0.260974	-1.09985	0.303048	6 months	Gestational age		Perinatal	ENS
6	smoke_before_pregyes	-1.73213	0.797257	-2.17261	0.0333514	-3.32346	-0.140795	6 months	Prenatal smoking	*	Parental	ENS
6	twins.siblings_in_luckiyes	-2.77738	0.982705	-2.82625	0.00620168	-4.73886	-0.815888	6 months	Siblings in cohort	**	Environmental	ENS
7	(Intercept)	9.04293	2.07477	4.35853	4.53669e-05	4.9028	13.1831	6 months	NA	***	NA	ENS
7	atopy_fatheryes	0.443012	0.654341	0.677036	0.50068	-0.862705	1.74873	6 months	Father's atopy		Parental	ENS
7	atopy_motheryes	-1.45437	0.674616	-2.15584	0.0346374	-2.80054	-0.108191	6 months	Mother's atopy	*	Parental	ENS
7	breastfeeding_6myes	-1.91482	0.959679	-1.99528	0.0500216	-3.82983	0.000185914	6 months	Breastfeeding		Dietary	ENS
7	covid_270220yes	0.367585	0.706234	0.520487	0.604415	-1.04168	1.77685	6 months	Collected during pandemic		Environmental	ENS
7	daycare_6myes	1.70059	0.716399	2.37381	0.0204363	0.271041	3.13015	6 months	Daycare	*	Environmental	ENS
7	delivery_placehospital	-1.54129	1.0444	-1.47576	0.144623	-3.62536	0.54278	6 months	Delivery place		Perinatal	ENS
7	delivery_typevaginal	-1.12804	1.05358	-1.07068	0.288101	-3.23043	0.974345	6 months	Delivery type		Perinatal	ENS
7	formulafeeding_6myes	1.05455	1.05742	0.997289	0.32216	-1.05549	3.1646	6 months	Formulafeeding		Dietary	ENS
7	mat_AB_use_final_deliveryyes	-1.47524	1.10018	-1.34091	0.184413	-3.67062	0.72014	6 months	Intrapartum antibiotics		Parental	ENS
7	mat_weightgain	1.56918	0.637671	2.4608	0.0164068	0.296731	2.84164	6 months	Maternal weight gain	*	Parental	ENS
7	older_siblingsyes	0.328057	0.729307	0.449821	0.65427	-1.12725	1.78337	6 months	Older siblings		Environmental	ENS
7	pregn_weeks	-0.424464	0.340242	-1.24753	0.216481	-1.10341	0.254479	6 months	Gestational age		Perinatal	ENS
7	smoke_before_pregyes	-1.70778	0.788642	-2.16546	0.0338634	-3.28149	-0.134065	6 months	Prenatal smoking	*	Parental	ENS
7	twins.siblings_in_luckiyes	-2.69984	0.948114	-2.84759	0.00582071	-4.59177	-0.807905	6 months	Siblings in cohort	**	Environmental	ENS
8	(Intercept)	9.23835	2.01701	4.58021	2.00179e-05	5.21452	13.2622	6 months	NA	***	NA	ENS
8	atopy_fatheryes	0.389147	0.639561	0.60846	0.54488	-0.886743	1.66504	6 months	Father's atopy		Parental	ENS
8	atopy_motheryes	-1.45953	0.670608	-2.17643	0.032949	-2.79736	-0.121703	6 months	Mother's atopy	*	Parental	ENS
8	breastfeeding_6myes	-1.96756	0.946969	-2.07774	0.0414562	-3.85671	-0.0784064	6 months	Breastfeeding	*	Dietary	ENS
8	covid_270220yes	0.336091	0.698681	0.481036	0.632013	-1.05774	1.72992	6 months	Collected during pandemic		Environmental	ENS
8	daycare_6myes	1.75766	0.700991	2.50739	0.0145204	0.359218	3.15609	6 months	Daycare	*	Environmental	ENS
8	delivery_placehospital	-1.68677	0.98731	-1.70845	0.0920489	-3.6564	0.282864	6 months	Delivery place		Perinatal	ENS
8	delivery_typevaginal	-1.02343	1.02164	-1.00176	0.319961	-3.06154	1.01468	6 months	Delivery type		Perinatal	ENS
8	formulafeeding_6myes	1.01863	1.04829	0.971711	0.334588	-1.07264	3.10991	6 months	Formulafeeding		Dietary	ENS
8	mat_AB_use_final_deliveryyes	-1.48426	1.09362	-1.35719	0.179143	-3.66598	0.697463	6 months	Intrapartum antibiotics		Parental	ENS
8	mat_weightgain	1.60367	0.629376	2.54803	0.0130638	0.348098	2.85924	6 months	Maternal weight gain	*	Parental	ENS
8	pregn_weeks	-0.440526	0.336402	-1.30952	0.194701	-1.11163	0.230577	6 months	Gestational age		Perinatal	ENS
8	smoke_before_pregyes	-1.66889	0.779344	-2.1414	0.0357759	-3.22363	-0.114136	6 months	Prenatal smoking	*	Parental	ENS
8	twins.siblings_in_luckiyes	-2.67895	0.941486	-2.84544	0.00583383	-4.55716	-0.800732	6 months	Siblings in cohort	**	Environmental	ENS
9	(Intercept)	9.16324	1.99989	4.58187	1.95492e-05	5.17458	13.1519	6 months	NA	***	NA	ENS
9	atopy_fatheryes	0.435213	0.62887	0.692056	0.491191	-0.819028	1.68945	6 months	Father's atopy		Parental	ENS
9	atopy_motheryes	-1.43698	0.665284	-2.15994	0.0342037	-2.76384	-0.110108	6 months	Mother's atopy	*	Parental	ENS
9	breastfeeding_6myes	-1.87952	0.924001	-2.03411	0.0457311	-3.72239	-0.03666	6 months	Breastfeeding	*	Dietary	ENS
9	daycare_6myes	1.77504	0.696205	2.54959	0.0129778	0.386499	3.16357	6 months	Daycare	*	Environmental	ENS
9	delivery_placehospital	-1.70592	0.981076	-1.73882	0.0864621	-3.66261	0.250776	6 months	Delivery place		Perinatal	ENS
9	delivery_typevaginal	-0.959889	1.00748	-0.952759	0.343991	-2.96925	1.04947	6 months	Delivery type		Perinatal	ENS
9	formulafeeding_6myes	1.145	1.00925	1.1345	0.260454	-0.86789	3.15789	6 months	Formulafeeding		Dietary	ENS
9	mat_AB_use_final_deliveryyes	-1.48342	1.0876	-1.36394	0.176957	-3.65258	0.685731	6 months	Intrapartum antibiotics		Parental	ENS
9	mat_weightgain	1.66209	0.61415	2.70632	0.00853977	0.437203	2.88697	6 months	Maternal weight gain	**	Parental	ENS
9	pregn_weeks	-0.438083	0.334512	-1.30962	0.194606	-1.10525	0.229079	6 months	Gestational age		Perinatal	ENS
9	smoke_before_pregyes	-1.7588	0.75243	-2.3375	0.0222783	-3.25948	-0.258128	6 months	Prenatal smoking	*	Parental	ENS
9	twins.siblings_in_luckiyes	-2.75453	0.923172	-2.98377	0.00391783	-4.59574	-0.913321	6 months	Siblings in cohort	**	Environmental	ENS
10	(Intercept)	9.4968	1.93381	4.91094	5.59943e-06	5.6409	13.3527	6 months	NA	***	NA	ENS
10	atopy_motheryes	-1.40803	0.661527	-2.12846	0.0367706	-2.72708	-0.0889842	6 months	Mother's atopy	*	Parental	ENS
10	breastfeeding_6myes	-1.89921	0.920168	-2.06398	0.0426755	-3.73397	-0.0644441	6 months	Breastfeeding	*	Dietary	ENS
10	daycare_6myes	1.79097	0.693266	2.58338	0.0118437	0.408634	3.1733	6 months	Daycare	*	Environmental	ENS
10	delivery_placehospital	-1.80647	0.966692	-1.86871	0.0657889	-3.73399	0.121064	6 months	Delivery place		Perinatal	ENS
10	delivery_typevaginal	-1.00486	1.00169	-1.00316	0.319189	-3.00217	0.992455	6 months	Delivery type		Perinatal	ENS
10	formulafeeding_6myes	1.06883	0.999544	1.06932	0.288549	-0.924205	3.06186	6 months	Formulafeeding		Dietary	ENS
10	mat_AB_use_final_deliveryyes	-1.39603	1.07628	-1.29709	0.198798	-3.54206	0.750002	6 months	Intrapartum antibiotics		Parental	ENS
10	mat_weightgain	1.64949	0.611623	2.69691	0.00873508	0.429949	2.86903	6 months	Maternal weight gain	**	Parental	ENS
10	pregn_weeks	-0.413675	0.331424	-1.24817	0.216068	-1.07452	0.247166	6 months	Gestational age		Perinatal	ENS
10	smoke_before_pregyes	-1.76799	0.749548	-2.35874	0.0210931	-3.26255	-0.273434	6 months	Prenatal smoking	*	Parental	ENS
10	twins.siblings_in_luckiyes	-2.66721	0.911147	-2.92731	0.0045908	-4.48399	-0.850435	6 months	Siblings in cohort	**	Environmental	ENS
11	(Intercept)	8.18075	1.42081	5.7578	1.94524e-07	5.34841	11.0131	6 months	NA	***	NA	ENS
11	atopy_motheryes	-1.40838	0.661556	-2.1289	0.0366843	-2.72717	-0.0895962	6 months	Mother's atopy	*	Parental	ENS
11	breastfeeding_6myes	-1.66741	0.890724	-1.87198	0.0652715	-3.44304	0.108212	6 months	Breastfeeding		Dietary	ENS
11	daycare_6myes	1.75679	0.692459	2.53704	0.0133467	0.376402	3.13719	6 months	Daycare	*	Environmental	ENS
11	delivery_placehospital	-1.7115	0.962088	-1.77895	0.0794696	-3.62939	0.206385	6 months	Delivery place		Perinatal	ENS
11	formulafeeding_6myes	1.41621	0.937684	1.51033	0.135336	-0.453029	3.28545	6 months	Formulafeeding		Dietary	ENS
11	mat_AB_use_final_deliveryyes	-1.33099	1.07437	-1.23886	0.219422	-3.4727	0.810725	6 months	Intrapartum antibiotics		Parental	ENS
11	mat_weightgain	1.82439	0.586272	3.11185	0.00266563	0.655679	2.9931	6 months	Maternal weight gain	**	Parental	ENS
11	pregn_weeks	-0.432471	0.330909	-1.30692	0.195399	-1.09213	0.227184	6 months	Gestational age		Perinatal	ENS
11	smoke_before_pregyes	-1.70514	0.746957	-2.28278	0.0253984	-3.19417	-0.216105	6 months	Prenatal smoking	*	Parental	ENS
11	twins.siblings_in_luckiyes	-2.65923	0.911152	-2.91853	0.00468985	-4.47558	-0.842879	6 months	Siblings in cohort	**	Environmental	ENS
12	(Intercept)	8.54172	1.3957	6.12003	4.24643e-08	5.7601	11.3233	6 months	NA	***	NA	ENS
12	atopy_motheryes	-1.58744	0.647935	-2.45	0.0166835	-2.87878	-0.296111	6 months	Mother's atopy	*	Parental	ENS
12	breastfeeding_6myes	-1.87186	0.878504	-2.13073	0.0364801	-3.62271	-0.121	6 months	Breastfeeding	*	Dietary	ENS
12	daycare_6myes	1.61545	0.685492	2.35662	0.0211275	0.249263	2.98163	6 months	Daycare	*	Environmental	ENS
12	delivery_placehospital	-1.81783	0.961756	-1.89012	0.0627121	-3.73461	0.0989444	6 months	Delivery place		Perinatal	ENS
12	formulafeeding_6myes	1.3106	0.937215	1.3984	0.166226	-0.557263	3.17847	6 months	Formulafeeding		Dietary	ENS
12	mat_weightgain	1.7603	0.586121	3.00331	0.00365608	0.592167	2.92844	6 months	Maternal weight gain	**	Parental	ENS
12	pregn_weeks	-0.386295	0.330005	-1.17057	0.245577	-1.04399	0.271404	6 months	Gestational age		Perinatal	ENS
12	smoke_before_pregyes	-1.74137	0.749113	-2.32457	0.0228795	-3.23435	-0.248389	6 months	Prenatal smoking	*	Parental	ENS
12	twins.siblings_in_luckiyes	-2.67609	0.914382	-2.92666	0.00456489	-4.49845	-0.853727	6 months	Siblings in cohort	**	Environmental	ENS
13	(Intercept)	8.23688	1.37461	5.99214	6.94243e-08	5.4979	10.9759	6 months	NA	***	NA	ENS
13	atopy_motheryes	-1.53262	0.647854	-2.36568	0.0206179	-2.82349	-0.241737	6 months	Mother's atopy	*	Parental	ENS
13	breastfeeding_6myes	-1.75169	0.874665	-2.00269	0.0488739	-3.49449	-0.00887769	6 months	Breastfeeding	*	Dietary	ENS
13	daycare_6myes	1.5435	0.684437	2.25513	0.0270824	0.179726	2.90727	6 months	Daycare	*	Environmental	ENS
13	delivery_placehospital	-1.71877	0.960419	-1.7896	0.0776092	-3.63244	0.194908	6 months	Delivery place		Perinatal	ENS
13	formulafeeding_6myes	1.48967	0.926957	1.60705	0.112301	-0.357331	3.33667	6 months	Formulafeeding		Dietary	ENS
13	mat_weightgain	1.68734	0.584253	2.88803	0.00508069	0.523189	2.85149	6 months	Maternal weight gain	**	Parental	ENS
13	smoke_before_pregyes	-1.79649	0.7495	-2.39691	0.0190595	-3.2899	-0.303074	6 months	Prenatal smoking	*	Parental	ENS
13	twins.siblings_in_luckiyes	-2.3409	0.87056	-2.68896	0.00885114	-4.07553	-0.606273	6 months	Siblings in cohort	**	Environmental	ENS
1	(Intercept)	11.2922	2.65343	4.25571	7.70502e-05	5.98081	16.6036	9 months	NA	***	NA	ENS
1	ageintrosolids	0.0500603	0.493047	0.101532	0.919478	-0.936881	1.037	9 months	Compelmentary foods age		Dietary	ENS
1	atopy_fatheryes	-1.53993	0.864701	-1.78088	0.0801682	-3.27082	0.190954	9 months	Father's atopy		Parental	ENS
1	atopy_motheryes	-2.85669	0.921404	-3.10036	0.00298156	-4.70108	-1.0123	9 months	Mother's atopy	**	Parental	ENS
1	birthweight	-0.398952	0.582688	-0.684675	0.496276	-1.56533	0.767426	9 months	Birth weight		Perinatal	ENS
1	breastfeeding_9myes	-0.482855	1.18995	-0.405779	0.686398	-2.86479	1.89908	9 months	Breastfeeding		Dietary	ENS
1	covid_270220yes	-0.249082	1.03288	-0.241152	0.810288	-2.31662	1.81846	9 months	Collected during pandemic		Environmental	ENS
1	daycare_14myes	0.416349	1.092	0.381272	0.704395	-1.76953	2.60223	9 months	Daycare		Environmental	ENS
1	delivery_placehospital	0.0626553	1.30456	0.048028	0.961859	-2.5487	2.67401	9 months	Delivery place		Perinatal	ENS
1	delivery_typevaginal	-0.0928367	1.38107	-0.0672209	0.946637	-2.85735	2.67168	9 months	Delivery type		Perinatal	ENS
1	formulafeeding_9myes	0.432046	1.51843	0.284534	0.777014	-2.60743	3.47152	9 months	Formulafeeding		Dietary	ENS
1	furrypet_home_yn_14myes	-0.667167	1.06551	-0.626145	0.533676	-2.80003	1.46569	9 months	Pets		Environmental	ENS
1	hospitalyes	0.552329	1.04632	0.527879	0.599597	-1.5421	2.64676	9 months	Hospitalisation		Perinatal	ENS
1	inf_ab_9myes	0.813077	1.3084	0.621428	0.536753	-1.80597	3.43212	9 months	Antibiotics		Infant's health	ENS
1	mat_AB_use_final_deliveryyes	-0.914335	1.36016	-0.672225	0.50411	-3.637	1.80833	9 months	Intrapartum antibiotics		Parental	ENS
1	mat_AB_use_final_pregyes	-0.768575	1.68131	-0.45713	0.649285	-4.13408	2.59693	9 months	Antepartum antibiotics		Parental	ENS
1	mat_weightgain	0.419515	0.437137	0.959686	0.341197	-0.455511	1.29454	9 months	Maternal weight gain		Parental	ENS
1	older_siblingsyes	0.0627301	1.16116	0.0540239	0.957102	-2.26157	2.38703	9 months	Older siblings		Environmental	ENS
1	pregn_weeks	0.43684	0.59813	0.730342	0.468121	-0.760447	1.63413	9 months	Gestational age		Perinatal	ENS
1	sexmale	-0.0532567	0.904144	-0.0589029	0.953232	-1.8631	1.75658	9 months	Sex		Perinatal	ENS
1	smoke_before_pregyes	-2.14863	1.17256	-1.83243	0.0720227	-4.49576	0.198501	9 months	Prenatal smoking		Parental	ENS
1	twins.siblings_in_luckiyes	-0.540044	1.29942	-0.415604	0.679233	-3.14111	2.06102	9 months	Siblings in cohort		Environmental	ENS
2	(Intercept)	11.3575	2.25979	5.02589	4.95809e-06	6.83565	15.8793	9 months	NA	***	NA	ENS
2	ageintrosolids	0.0566264	0.469691	0.120561	0.904448	-0.883224	0.996477	9 months	Compelmentary foods age		Dietary	ENS
2	atopy_fatheryes	-1.53832	0.856715	-1.79561	0.0776783	-3.25261	0.175959	9 months	Father's atopy		Parental	ENS
2	atopy_motheryes	-2.84893	0.899445	-3.16743	0.00243566	-4.64872	-1.04915	9 months	Mother's atopy	**	Parental	ENS
2	birthweight	-0.39674	0.575934	-0.688864	0.493609	-1.54918	0.755701	9 months	Birth weight		Perinatal	ENS
2	breastfeeding_9myes	-0.499955	1.12579	-0.44409	0.658602	-2.75267	1.75276	9 months	Breastfeeding		Dietary	ENS
2	covid_270220yes	-0.257439	1.00947	-0.255024	0.799592	-2.27739	1.76251	9 months	Collected during pandemic		Environmental	ENS
2	daycare_14myes	0.414075	1.08171	0.382796	0.703246	-1.75042	2.57857	9 months	Daycare		Environmental	ENS
2	delivery_typevaginal	-0.103992	1.34984	-0.0770406	0.938852	-2.80501	2.59703	9 months	Delivery type		Perinatal	ENS
2	formulafeeding_9myes	0.435289	1.50405	0.289412	0.773281	-2.57431	3.44489	9 months	Formulafeeding		Dietary	ENS
2	furrypet_home_yn_14myes	-0.675531	1.04226	-0.648141	0.519408	-2.76109	1.41002	9 months	Pets		Environmental	ENS
2	hospitalyes	0.564608	1.00599	0.561247	0.576755	-1.44837	2.57759	9 months	Hospitalisation		Perinatal	ENS
2	inf_ab_9myes	0.807356	1.2919	0.624935	0.534423	-1.77774	3.39245	9 months	Antibiotics		Infant's health	ENS
2	mat_AB_use_final_deliveryyes	-0.908375	1.34299	-0.676383	0.50144	-3.59569	1.77894	9 months	Intrapartum antibiotics		Parental	ENS
2	mat_AB_use_final_pregyes	-0.757371	1.6509	-0.458761	0.648091	-4.06082	2.54608	9 months	Antepartum antibiotics		Parental	ENS
2	mat_weightgain	0.416887	0.430019	0.969464	0.336271	-0.443578	1.27735	9 months	Maternal weight gain		Parental	ENS
2	older_siblingsyes	0.0468341	1.10354	0.04244	0.966291	-2.16133	2.255	9 months	Older siblings		Environmental	ENS
2	pregn_weeks	0.43543	0.592336	0.735106	0.465187	-0.749833	1.62069	9 months	Gestational age		Perinatal	ENS
2	sexmale	-0.050784	0.895012	-0.0567411	0.954943	-1.8417	1.74013	9 months	Sex		Perinatal	ENS
2	smoke_before_pregyes	-2.15014	1.16218	-1.85008	0.0693113	-4.47566	0.175389	9 months	Prenatal smoking		Parental	ENS
2	twins.siblings_in_luckiyes	-0.552686	1.26167	-0.438058	0.662944	-3.07729	1.97191	9 months	Siblings in cohort		Environmental	ENS
3	(Intercept)	11.3814	2.17028	5.24421	2.14914e-06	7.04018	15.7226	9 months	NA	***	NA	ENS
3	ageintrosolids	0.0627203	0.44347	0.141431	0.888003	-0.824351	0.949792	9 months	Compelmentary foods age		Dietary	ENS
3	atopy_fatheryes	-1.541	0.847255	-1.81882	0.0739311	-3.23576	0.153762	9 months	Father's atopy		Parental	ENS
3	atopy_motheryes	-2.84938	0.891871	-3.19484	0.00223108	-4.63339	-1.06537	9 months	Mother's atopy	**	Parental	ENS
3	birthweight	-0.397796	0.57059	-0.697165	0.488392	-1.53915	0.743555	9 months	Birth weight		Perinatal	ENS
3	breastfeeding_9myes	-0.499645	1.11637	-0.447563	0.65608	-2.73271	1.73342	9 months	Breastfeeding		Dietary	ENS
3	covid_270220yes	-0.261623	0.996257	-0.262606	0.793754	-2.25443	1.73119	9 months	Collected during pandemic		Environmental	ENS
3	daycare_14myes	0.418296	1.06813	0.391616	0.69673	-1.71828	2.55487	9 months	Daycare		Environmental	ENS
3	delivery_typevaginal	-0.0972482	1.32925	-0.07316	0.941922	-2.75615	2.56166	9 months	Delivery type		Perinatal	ENS
3	formulafeeding_9myes	0.427833	1.48128	0.288827	0.773709	-2.53516	3.39083	9 months	Formulafeeding		Dietary	ENS
3	furrypet_home_yn_14myes	-0.688655	0.987017	-0.697713	0.488052	-2.66298	1.28567	9 months	Pets		Environmental	ENS
3	hospitalyes	0.551891	0.952302	0.579533	0.564399	-1.353	2.45678	9 months	Hospitalisation		Perinatal	ENS
3	inf_ab_9myes	0.82168	1.23662	0.664459	0.508942	-1.65192	3.29528	9 months	Antibiotics		Infant's health	ENS
3	mat_AB_use_final_deliveryyes	-0.912552	1.32819	-0.687066	0.494688	-3.56932	1.74422	9 months	Intrapartum antibiotics		Parental	ENS
3	mat_AB_use_final_pregyes	-0.762867	1.63207	-0.467423	0.64189	-4.02749	2.50176	9 months	Antepartum antibiotics		Parental	ENS
3	mat_weightgain	0.422471	0.405977	1.04063	0.302224	-0.389604	1.23455	9 months	Maternal weight gain		Parental	ENS
3	pregn_weeks	0.43343	0.585528	0.740239	0.462042	-0.737799	1.60466	9 months	Gestational age		Perinatal	ENS
3	sexmale	-0.055609	0.880346	-0.0631672	0.949843	-1.81656	1.70535	9 months	Sex		Perinatal	ENS
3	smoke_before_pregyes	-2.14269	1.13928	-1.88074	0.0648628	-4.4216	0.136209	9 months	Prenatal smoking		Parental	ENS
3	twins.siblings_in_luckiyes	-0.547058	1.2442	-0.439685	0.661745	-3.03584	1.94172	9 months	Siblings in cohort		Environmental	ENS
4	(Intercept)	11.3765	2.15114	5.28861	1.76015e-06	7.07506	15.678	9 months	NA	***	NA	ENS
4	ageintrosolids	0.0581941	0.434055	0.134071	0.893788	-0.809752	0.926141	9 months	Compelmentary foods age		Dietary	ENS
4	atopy_fatheryes	-1.53524	0.835436	-1.83766	0.0709843	-3.2058	0.135313	9 months	Father's atopy		Parental	ENS
4	atopy_motheryes	-2.85204	0.883572	-3.22785	0.00200861	-4.61885	-1.08523	9 months	Mother's atopy	**	Parental	ENS
4	birthweight	-0.404397	0.55634	-0.726889	0.470074	-1.51687	0.708072	9 months	Birth weight		Perinatal	ENS
4	breastfeeding_9myes	-0.509427	1.09651	-0.464589	0.64388	-2.70204	1.68318	9 months	Breastfeeding		Dietary	ENS
4	covid_270220yes	-0.270513	0.978181	-0.276547	0.783063	-2.22651	1.68548	9 months	Collected during pandemic		Environmental	ENS
4	daycare_14myes	0.425558	1.05322	0.404055	0.687585	-1.68048	2.5316	9 months	Daycare		Environmental	ENS
4	delivery_typevaginal	-0.10267	1.31561	-0.0780402	0.938052	-2.73339	2.52805	9 months	Delivery type		Perinatal	ENS
4	formulafeeding_9myes	0.410193	1.44279	0.284306	0.777139	-2.47484	3.29523	9 months	Formulafeeding		Dietary	ENS
4	furrypet_home_yn_14myes	-0.692886	0.976669	-0.709438	0.480756	-2.64586	1.26008	9 months	Pets		Environmental	ENS
4	hospitalyes	0.54888	0.943312	0.581865	0.562802	-1.33739	2.43515	9 months	Hospitalisation		Perinatal	ENS
4	inf_ab_9myes	0.816063	1.2233	0.667098	0.507225	-1.63008	3.26221	9 months	Antibiotics		Infant's health	ENS
4	mat_AB_use_final_deliveryyes	-0.904165	1.3107	-0.689834	0.492915	-3.52507	1.71674	9 months	Intrapartum antibiotics		Parental	ENS
4	mat_AB_use_final_pregyes	-0.768315	1.61643	-0.475316	0.636259	-4.00056	2.46393	9 months	Antepartum antibiotics		Parental	ENS
4	mat_weightgain	0.428927	0.389683	1.10071	0.275349	-0.350292	1.20815	9 months	Maternal weight gain		Parental	ENS
4	pregn_weeks	0.438537	0.575165	0.762454	0.448727	-0.711577	1.58865	9 months	Gestational age		Perinatal	ENS
4	smoke_before_pregyes	-2.15212	1.12022	-1.92116	0.0593881	-4.39213	0.0878985	9 months	Prenatal smoking		Parental	ENS
4	twins.siblings_in_luckiyes	-0.556882	1.22433	-0.454847	0.650834	-3.00508	1.89131	9 months	Siblings in cohort		Environmental	ENS
5	(Intercept)	11.2661	1.60735	7.00913	2.07336e-09	8.05307	14.4792	9 months	NA	***	NA	ENS
5	ageintrosolids	0.0565422	0.430049	0.131478	0.895823	-0.803114	0.916199	9 months	Compelmentary foods age		Dietary	ENS
5	atopy_fatheryes	-1.54095	0.825528	-1.86663	0.0666839	-3.19116	0.109252	9 months	Father's atopy		Parental	ENS
5	atopy_motheryes	-2.86687	0.85595	-3.34934	0.00138216	-4.57789	-1.15585	9 months	Mother's atopy	**	Parental	ENS
5	birthweight	-0.3895	0.518357	-0.751412	0.455248	-1.42568	0.646681	9 months	Birth weight		Perinatal	ENS
5	breastfeeding_9myes	-0.497489	1.07705	-0.4619	0.64577	-2.65048	1.6555	9 months	Breastfeeding		Dietary	ENS
5	covid_270220yes	-0.267663	0.969632	-0.276046	0.783431	-2.20593	1.6706	9 months	Collected during pandemic		Environmental	ENS
5	daycare_14myes	0.416559	1.03846	0.401131	0.689703	-1.6593	2.49241	9 months	Daycare		Environmental	ENS
5	formulafeeding_9myes	0.431401	1.40556	0.306925	0.759929	-2.37827	3.24108	9 months	Formulafeeding		Dietary	ENS
5	furrypet_home_yn_14myes	-0.685527	0.964283	-0.710919	0.4798	-2.6131	1.24205	9 months	Pets		Environmental	ENS
5	hospitalyes	0.551894	0.934935	0.590302	0.557134	-1.31702	2.4208	9 months	Hospitalisation		Perinatal	ENS
5	inf_ab_9myes	0.830828	1.19886	0.693018	0.490886	-1.56565	3.22731	9 months	Antibiotics		Infant's health	ENS
5	mat_AB_use_final_deliveryyes	-0.890116	1.28783	-0.691175	0.492035	-3.46445	1.68422	9 months	Intrapartum antibiotics		Parental	ENS
5	mat_AB_use_final_pregyes	-0.742673	1.56994	-0.473057	0.637834	-3.88094	2.3956	9 months	Antepartum antibiotics		Parental	ENS
5	mat_weightgain	0.432292	0.384173	1.12525	0.264819	-0.335659	1.20024	9 months	Maternal weight gain		Parental	ENS
5	pregn_weeks	0.433327	0.56668	0.764677	0.447365	-0.69945	1.5661	9 months	Gestational age		Perinatal	ENS
5	smoke_before_pregyes	-2.1337	1.08627	-1.96425	0.0539876	-4.30511	0.0377145	9 months	Prenatal smoking		Parental	ENS
5	twins.siblings_in_luckiyes	-0.538037	1.19062	-0.451897	0.65292	-2.91805	1.84198	9 months	Siblings in cohort		Environmental	ENS
6	(Intercept)	11.2772	1.59257	7.08115	1.44282e-09	8.09471	14.4597	9 months	NA	***	NA	ENS
6	atopy_fatheryes	-1.55503	0.812145	-1.91472	0.060071	-3.17797	0.0679093	9 months	Father's atopy		Parental	ENS
6	atopy_motheryes	-2.86592	0.849218	-3.37477	0.00126878	-4.56294	-1.16889	9 months	Mother's atopy	**	Parental	ENS
6	birthweight	-0.386126	0.513668	-0.751703	0.455029	-1.41261	0.640357	9 months	Birth weight		Perinatal	ENS
6	breastfeeding_9myes	-0.463019	1.03647	-0.446725	0.656606	-2.53425	1.60821	9 months	Breastfeeding		Dietary	ENS
6	covid_270220yes	-0.300997	0.928571	-0.324151	0.746898	-2.1566	1.5546	9 months	Collected during pandemic		Environmental	ENS
6	daycare_14myes	0.439969	1.01507	0.433435	0.666179	-1.58849	2.46843	9 months	Daycare		Environmental	ENS
6	formulafeeding_9myes	0.420178	1.39198	0.301856	0.763756	-2.36147	3.20183	9 months	Formulafeeding		Dietary	ENS
6	furrypet_home_yn_14myes	-0.696516	0.953132	-0.730766	0.467631	-2.6012	1.20817	9 months	Pets		Environmental	ENS
6	hospitalyes	0.542342	0.92481	0.586436	0.559678	-1.30574	2.39043	9 months	Hospitalisation		Perinatal	ENS
6	inf_ab_9myes	0.815427	1.18378	0.688835	0.493456	-1.55016	3.18102	9 months	Antibiotics		Infant's health	ENS
6	mat_AB_use_final_deliveryyes	-0.89293	1.27757	-0.698929	0.487169	-3.44595	1.66009	9 months	Intrapartum antibiotics		Parental	ENS
6	mat_AB_use_final_pregyes	-0.72564	1.55234	-0.46745	0.641791	-3.82774	2.37646	9 months	Antepartum antibiotics		Parental	ENS
6	mat_weightgain	0.439372	0.377401	1.16421	0.248731	-0.314803	1.19355	9 months	Maternal weight gain		Parental	ENS
6	pregn_weeks	0.428862	0.561232	0.764143	0.447634	-0.692671	1.55039	9 months	Gestational age		Perinatal	ENS
6	smoke_before_pregyes	-2.14436	1.07475	-1.99522	0.050348	-4.29208	0.00335388	9 months	Prenatal smoking		Parental	ENS
6	twins.siblings_in_luckiyes	-0.546451	1.17959	-0.463256	0.644777	-2.90367	1.81077	9 months	Siblings in cohort		Environmental	ENS
7	(Intercept)	11.5851	1.21426	9.54088	6.49903e-14	9.15936	14.0109	9 months	NA	***	NA	ENS
7	atopy_fatheryes	-1.55354	0.806342	-1.92665	0.0584655	-3.1644	0.0573122	9 months	Father's atopy		Parental	ENS
7	atopy_motheryes	-2.78558	0.800686	-3.47899	0.000910923	-4.38513	-1.18602	9 months	Mother's atopy	***	Parental	ENS
7	birthweight	-0.392293	0.509604	-0.7698	0.444251	-1.41034	0.625757	9 months	Birth weight		Perinatal	ENS
7	breastfeeding_9myes	-0.642605	0.84267	-0.762582	0.448514	-2.32603	1.04082	9 months	Breastfeeding		Dietary	ENS
7	covid_270220yes	-0.337107	0.914272	-0.368716	0.713556	-2.16357	1.48936	9 months	Collected during pandemic		Environmental	ENS
7	daycare_14myes	0.545283	0.946439	0.576142	0.56654	-1.34545	2.43601	9 months	Daycare		Environmental	ENS
7	furrypet_home_yn_14myes	-0.752156	0.928475	-0.810098	0.420886	-2.607	1.10269	9 months	Pets		Environmental	ENS
7	hospitalyes	0.622128	0.879918	0.707029	0.482115	-1.13571	2.37997	9 months	Hospitalisation		Perinatal	ENS
7	inf_ab_9myes	0.816609	1.17534	0.694789	0.489703	-1.53139	3.16461	9 months	Antibiotics		Infant's health	ENS
7	mat_AB_use_final_deliveryyes	-0.919027	1.26556	-0.726183	0.470374	-3.44727	1.60922	9 months	Intrapartum antibiotics		Parental	ENS
7	mat_AB_use_final_pregyes	-0.678863	1.53358	-0.442666	0.6595	-3.74254	2.38481	9 months	Antepartum antibiotics		Parental	ENS
7	mat_weightgain	0.44088	0.374679	1.17669	0.243678	-0.307627	1.18939	9 months	Maternal weight gain		Parental	ENS
7	pregn_weeks	0.445064	0.554679	0.802381	0.425302	-0.663034	1.55316	9 months	Gestational age		Perinatal	ENS
7	smoke_before_pregyes	-2.13958	1.06698	-2.00528	0.0491663	-4.27111	-0.00805093	9 months	Prenatal smoking	*	Parental	ENS
7	twins.siblings_in_luckiyes	-0.591095	1.16194	-0.508713	0.612702	-2.91234	1.73015	9 months	Siblings in cohort		Environmental	ENS
8	(Intercept)	11.5023	1.18533	9.70385	2.90461e-14	9.135	13.8695	9 months	NA	***	NA	ENS
8	atopy_fatheryes	-1.57968	0.797865	-1.97988	0.0519538	-3.17312	0.0137683	9 months	Father's atopy		Parental	ENS
8	atopy_motheryes	-2.80766	0.793119	-3.54002	0.00074519	-4.39163	-1.22369	9 months	Mother's atopy	***	Parental	ENS
8	birthweight	-0.394741	0.506162	-0.779871	0.438297	-1.40562	0.616135	9 months	Birth weight		Perinatal	ENS
8	breastfeeding_9myes	-0.591776	0.825774	-0.716632	0.476168	-2.24096	1.05741	9 months	Breastfeeding		Dietary	ENS
8	daycare_14myes	0.505652	0.934045	0.541357	0.590112	-1.35976	2.37107	9 months	Daycare		Environmental	ENS
8	furrypet_home_yn_14myes	-0.723471	0.91904	-0.787202	0.434024	-2.55892	1.11198	9 months	Pets		Environmental	ENS
8	hospitalyes	0.555247	0.855277	0.649201	0.518496	-1.15286	2.26335	9 months	Hospitalisation		Perinatal	ENS
8	inf_ab_9myes	0.940327	1.11891	0.840395	0.403768	-1.29429	3.17495	9 months	Antibiotics		Infant's health	ENS
8	mat_AB_use_final_deliveryyes	-0.850852	1.24363	-0.684169	0.496301	-3.33455	1.63285	9 months	Intrapartum antibiotics		Parental	ENS
8	mat_AB_use_final_pregyes	-0.822642	1.47328	-0.558373	0.578508	-3.76499	2.11971	9 months	Antepartum antibiotics		Parental	ENS
8	mat_weightgain	0.434027	0.371722	1.16761	0.247229	-0.308353	1.17641	9 months	Maternal weight gain		Parental	ENS
8	pregn_weeks	0.446337	0.550969	0.810096	0.420841	-0.654023	1.5467	9 months	Gestational age		Perinatal	ENS
8	smoke_before_pregyes	-2.09321	1.05247	-1.98885	0.0509305	-4.19514	0.00872381	9 months	Prenatal smoking		Parental	ENS
8	twins.siblings_in_luckiyes	-0.53749	1.14512	-0.469373	0.640373	-2.82446	1.74948	9 months	Siblings in cohort		Environmental	ENS
9	(Intercept)	11.49	1.17802	9.75365	2.03435e-14	9.13802	13.842	9 months	NA	***	NA	ENS
9	atopy_fatheryes	-1.64712	0.780169	-2.11124	0.0385429	-3.20478	-0.0894669	9 months	Father's atopy	*	Parental	ENS
9	atopy_motheryes	-2.8117	0.788374	-3.56645	0.000679254	-4.38574	-1.23766	9 months	Mother's atopy	***	Parental	ENS
9	birthweight	-0.364393	0.499041	-0.730185	0.467861	-1.36076	0.631976	9 months	Birth weight		Perinatal	ENS
9	breastfeeding_9myes	-0.610817	0.81989	-0.744998	0.458918	-2.24778	1.02615	9 months	Breastfeeding		Dietary	ENS
9	daycare_14myes	0.413732	0.907874	0.455716	0.65009	-1.3989	2.22636	9 months	Daycare		Environmental	ENS
9	furrypet_home_yn_14myes	-0.728454	0.913535	-0.797402	0.428077	-2.55239	1.09548	9 months	Pets		Environmental	ENS
9	hospitalyes	0.552889	0.850196	0.650308	0.51775	-1.14458	2.25036	9 months	Hospitalisation		Perinatal	ENS
9	inf_ab_9myes	0.975785	1.10974	0.879288	0.382435	-1.23989	3.19146	9 months	Antibiotics		Infant's health	ENS
9	mat_AB_use_final_deliveryyes	-0.849859	1.23626	-0.687444	0.494212	-3.31813	1.61841	9 months	Intrapartum antibiotics		Parental	ENS
9	mat_AB_use_final_pregyes	-0.717347	1.44748	-0.495584	0.621834	-3.60733	2.17264	9 months	Antepartum antibiotics		Parental	ENS
9	mat_weightgain	0.435685	0.369503	1.17911	0.242588	-0.302052	1.17342	9 months	Maternal weight gain		Parental	ENS
9	pregn_weeks	0.496934	0.53712	0.925183	0.358241	-0.57546	1.56933	9 months	Gestational age		Perinatal	ENS
9	smoke_before_pregyes	-2.00991	1.03126	-1.94899	0.0555488	-4.06888	0.0490599	9 months	Prenatal smoking		Parental	ENS
10	(Intercept)	12.3734	0.972275	12.7263	4.20813e-20	10.4352	14.3116	9 months	NA	***	NA	ENS
10	atopy_fatheryes	-2.07615	0.782569	-2.65299	0.00980973	-3.63617	-0.516125	9 months	Father's atopy	**	Parental	ENS
10	atopy_motheryes	-2.70845	0.805054	-3.3643	0.00123283	-4.31329	-1.1036	9 months	Mother's atopy	**	Parental	ENS
10	birthweight	-0.242869	0.51496	-0.471628	0.638619	-1.26942	0.783684	9 months	Birth weight		Perinatal	ENS
10	breastfeeding_9myes	-0.751209	0.815302	-0.921387	0.359926	-2.37648	0.874067	9 months	Breastfeeding		Dietary	ENS
10	furrypet_home_yn_14myes	-0.896267	0.89099	-1.00592	0.317822	-2.67242	0.87989	9 months	Pets		Environmental	ENS
10	hospitalyes	0.0279823	0.847857	0.0330035	0.973763	-1.66219	1.71816	9 months	Hospitalisation		Perinatal	ENS
10	inf_ab_9myes	0.821865	1.11875	0.734626	0.464953	-1.40833	3.05206	9 months	Antibiotics		Infant's health	ENS
10	mat_AB_use_final_deliveryyes	-0.854639	1.23476	-0.692148	0.49107	-3.31609	1.60682	9 months	Intrapartum antibiotics		Parental	ENS
10	mat_AB_use_final_pregyes	-0.216231	1.33935	-0.161445	0.872195	-2.88617	2.4537	9 months	Antepartum antibiotics		Parental	ENS
10	mat_weightgain	0.533525	0.378313	1.41027	0.162764	-0.220628	1.28768	9 months	Maternal weight gain		Parental	ENS
10	pregn_weeks	0.314037	0.537204	0.584577	0.56066	-0.75686	1.38493	9 months	Gestational age		Perinatal	ENS
10	smoke_before_pregyes	-2.00946	1.06583	-1.88534	0.0634189	-4.13416	0.115242	9 months	Prenatal smoking		Parental	ENS
11	(Intercept)	12.3844	0.906891	13.6559	8.60019e-22	10.577	14.1919	9 months	NA	***	NA	ENS
11	atopy_fatheryes	-2.07801	0.775184	-2.68066	0.00907773	-3.62295	-0.533067	9 months	Father's atopy	**	Parental	ENS
11	atopy_motheryes	-2.7106	0.796886	-3.40149	0.00109034	-4.29879	-1.12241	9 months	Mother's atopy	**	Parental	ENS
11	birthweight	-0.24207	0.510859	-0.47385	0.637021	-1.26021	0.77607	9 months	Birth weight		Perinatal	ENS
11	breastfeeding_9myes	-0.74824	0.804763	-0.929765	0.355557	-2.35213	0.85565	9 months	Breastfeeding		Dietary	ENS
11	furrypet_home_yn_14myes	-0.896756	0.884751	-1.01357	0.314136	-2.66006	0.86655	9 months	Pets		Environmental	ENS
11	inf_ab_9myes	0.831177	1.07515	0.773079	0.441972	-1.3116	2.97395	9 months	Antibiotics		Infant's health	ENS
11	mat_AB_use_final_deliveryyes	-0.849105	1.21493	-0.698894	0.486839	-3.27045	1.57224	9 months	Intrapartum antibiotics		Parental	ENS
11	mat_AB_use_final_pregyes	-0.223317	1.31295	-0.170089	0.865411	-2.84002	2.39338	9 months	Antepartum antibiotics		Parental	ENS
11	mat_weightgain	0.536031	0.368074	1.45631	0.149594	-0.197539	1.2696	9 months	Maternal weight gain		Parental	ENS
11	pregn_weeks	0.309187	0.513167	0.602508	0.548703	-0.713553	1.33193	9 months	Gestational age		Perinatal	ENS
11	smoke_before_pregyes	-2.0083	1.05794	-1.89831	0.0616081	-4.11676	0.10017	9 months	Prenatal smoking		Parental	ENS
12	(Intercept)	12.3795	0.90045	13.7481	4.55004e-22	10.5853	14.1736	9 months	NA	***	NA	ENS
12	atopy_fatheryes	-2.06887	0.76823	-2.69303	0.00875342	-3.5996	-0.538138	9 months	Father's atopy	**	Parental	ENS
12	atopy_motheryes	-2.71203	0.791596	-3.42603	0.00100281	-4.28932	-1.13474	9 months	Mother's atopy	**	Parental	ENS
12	birthweight	-0.251682	0.504381	-0.498993	0.619264	-1.25668	0.753318	9 months	Birth weight		Perinatal	ENS
12	breastfeeding_9myes	-0.770037	0.789264	-0.97564	0.332421	-2.34268	0.802605	9 months	Breastfeeding		Dietary	ENS
12	furrypet_home_yn_14myes	-0.920141	0.86825	-1.05977	0.292698	-2.65017	0.809885	9 months	Pets		Environmental	ENS
12	inf_ab_9myes	0.799804	1.05224	0.760097	0.449611	-1.29683	2.89643	9 months	Antibiotics		Infant's health	ENS
12	mat_AB_use_final_deliveryyes	-0.880705	1.19273	-0.738391	0.462612	-3.25728	1.49587	9 months	Intrapartum antibiotics		Parental	ENS
12	mat_weightgain	0.539257	0.365165	1.47675	0.143987	-0.188351	1.26686	9 months	Maternal weight gain		Parental	ENS
12	pregn_weeks	0.320739	0.505304	0.634744	0.527553	-0.686102	1.32758	9 months	Gestational age		Perinatal	ENS
12	smoke_before_pregyes	-1.98919	1.04503	-1.90347	0.0608679	-4.07146	0.0930816	9 months	Prenatal smoking		Parental	ENS
13	(Intercept)	12.3148	0.886605	13.8898	1.97822e-22	10.5486	14.081	9 months	NA	***	NA	ENS
13	atopy_fatheryes	-2.054	0.763799	-2.68919	0.00882205	-3.57557	-0.532439	9 months	Father's atopy	**	Parental	ENS
13	atopy_motheryes	-2.65735	0.78004	-3.40669	0.00105993	-4.21127	-1.10343	9 months	Mother's atopy	**	Parental	ENS
13	breastfeeding_9myes	-0.776382	0.7852	-0.98877	0.325955	-2.34058	0.787816	9 months	Breastfeeding		Dietary	ENS
13	furrypet_home_yn_14myes	-0.953543	0.861321	-1.10707	0.271801	-2.66938	0.762296	9 months	Pets		Environmental	ENS
13	inf_ab_9myes	0.858818	1.04032	0.82553	0.411689	-1.21361	2.93125	9 months	Antibiotics		Infant's health	ENS
13	mat_AB_use_final_deliveryyes	-0.93178	1.18237	-0.788061	0.433145	-3.28718	1.42362	9 months	Intrapartum antibiotics		Parental	ENS
13	mat_weightgain	0.502664	0.355931	1.41225	0.162011	-0.206386	1.21171	9 months	Maternal weight gain		Parental	ENS
13	pregn_weeks	0.198453	0.439681	0.451356	0.653035	-0.677437	1.07434	9 months	Gestational age		Perinatal	ENS
13	smoke_before_pregyes	-1.93702	1.03457	-1.87229	0.0650642	-3.99799	0.123951	9 months	Prenatal smoking		Parental	ENS
14	(Intercept)	12.3195	0.881887	13.9695	1.09272e-22	10.5631	14.076	9 months	NA	***	NA	ENS
14	atopy_fatheryes	-2.07148	0.75881	-2.7299	0.00786924	-3.58278	-0.560177	9 months	Father's atopy	**	Parental	ENS
14	atopy_motheryes	-2.69519	0.771449	-3.49367	0.000797921	-4.23166	-1.15872	9 months	Mother's atopy	***	Parental	ENS
14	breastfeeding_9myes	-0.765587	0.780713	-0.980625	0.329889	-2.32051	0.789338	9 months	Breastfeeding		Dietary	ENS
14	furrypet_home_yn_14myes	-0.934168	0.855732	-1.09166	0.278431	-2.63851	0.77017	9 months	Pets		Environmental	ENS
14	inf_ab_9myes	0.803043	1.02753	0.781526	0.436921	-1.24347	2.84955	9 months	Antibiotics		Infant's health	ENS
14	mat_AB_use_final_deliveryyes	-0.923666	1.17602	-0.785414	0.434653	-3.26592	1.41859	9 months	Intrapartum antibiotics		Parental	ENS
14	mat_weightgain	0.547514	0.339984	1.61041	0.111454	-0.129624	1.22465	9 months	Maternal weight gain		Parental	ENS
14	smoke_before_pregyes	-1.79937	0.983405	-1.82973	0.0712119	-3.75799	0.159255	9 months	Prenatal smoking		Parental	ENS
15	(Intercept)	12.1896	0.869592	14.0176	3.00135e-23	10.459	13.9201	9 months	NA	***	NA	ENS
15	atopy_fatheryes	-2.05587	0.773263	-2.6587	0.00947122	-3.59471	-0.51703	9 months	Father's atopy	**	Parental	ENS
15	atopy_motheryes	-2.23951	0.778236	-2.87768	0.00513523	-3.78825	-0.690772	9 months	Mother's atopy	**	Parental	ENS
15	breastfeeding_9myes	-0.796973	0.800827	-0.995187	0.322646	-2.39067	0.796724	9 months	Breastfeeding		Dietary	ENS
15	furrypet_home_yn_14myes	-0.92328	0.870384	-1.06077	0.291985	-2.6554	0.808839	9 months	Pets		Environmental	ENS
15	mat_AB_use_final_deliveryyes	-1.06179	1.20491	-0.881217	0.38084	-3.45963	1.33606	9 months	Intrapartum antibiotics		Parental	ENS
15	mat_weightgain	0.493664	0.349886	1.41093	0.162143	-0.202632	1.18996	9 months	Maternal weight gain		Parental	ENS
15	smoke_before_pregyes	-1.7857	0.998258	-1.78881	0.0774304	-3.77229	0.2009	9 months	Prenatal smoking		Parental	ENS
16	(Intercept)	12.0979	0.862154	14.0322	2.16309e-23	10.3825	13.8133	9 months	NA	***	NA	ENS
16	atopy_fatheryes	-2.15269	0.764361	-2.81633	0.00609908	-3.67353	-0.631855	9 months	Father's atopy	**	Parental	ENS
16	atopy_motheryes	-2.24167	0.777158	-2.88445	0.00502181	-3.78797	-0.69537	9 months	Mother's atopy	**	Parental	ENS
16	breastfeeding_9myes	-0.754851	0.798296	-0.945577	0.347176	-2.34321	0.833508	9 months	Breastfeeding		Dietary	ENS
16	furrypet_home_yn_14myes	-0.936076	0.869062	-1.07711	0.284628	-2.66524	0.793084	9 months	Pets		Environmental	ENS
16	mat_weightgain	0.461555	0.347504	1.3282	0.187842	-0.229868	1.15298	9 months	Maternal weight gain		Parental	ENS
16	smoke_before_pregyes	-1.76069	0.996477	-1.76692	0.0810089	-3.74337	0.221984	9 months	Prenatal smoking		Parental	ENS
17	(Intercept)	11.7582	0.78325	15.0121	3.03284e-25	10.2001	13.3164	9 months	NA	***	NA	ENS
17	atopy_fatheryes	-2.22472	0.760065	-2.92701	0.00442742	-3.73673	-0.712708	9 months	Father's atopy	**	Parental	ENS
17	atopy_motheryes	-2.29005	0.774972	-2.95501	0.00408037	-3.83171	-0.748382	9 months	Mother's atopy	**	Parental	ENS
17	furrypet_home_yn_14myes	-0.834974	0.861902	-0.968757	0.335515	-2.54957	0.879624	9 months	Pets		Environmental	ENS
17	mat_weightgain	0.399463	0.341023	1.17137	0.244844	-0.27894	1.07787	9 months	Maternal weight gain		Parental	ENS
17	smoke_before_pregyes	-1.56304	0.973676	-1.60529	0.112274	-3.49999	0.373917	9 months	Prenatal smoking		Parental	ENS
18	(Intercept)	11.4299	0.702683	16.266	4.05432e-28	10.0332	12.8265	9 months	NA	***	NA	ENS
18	atopy_fatheryes	-1.98658	0.732346	-2.71262	0.00804497	-3.44219	-0.53096	9 months	Father's atopy	**	Parental	ENS
18	atopy_motheryes	-2.25918	0.741659	-3.04612	0.00306812	-3.73331	-0.785052	9 months	Mother's atopy	**	Parental	ENS
18	mat_weightgain	0.384112	0.33488	1.14702	0.25452	-0.281498	1.04972	9 months	Maternal weight gain		Parental	ENS
18	smoke_before_pregyes	-1.52123	0.925423	-1.64382	0.103823	-3.3606	0.31815	9 months	Prenatal smoking		Parental	ENS
19	(Intercept)	11.344	0.699932	16.2072	3.72463e-28	9.95298	12.7349	9 months	NA	***	NA	ENS
19	atopy_fatheryes	-2.05276	0.731377	-2.80671	0.00616205	-3.50622	-0.599303	9 months	Father's atopy	**	Parental	ENS
19	atopy_motheryes	-2.14758	0.736567	-2.91566	0.0045016	-3.61135	-0.683809	9 months	Mother's atopy	**	Parental	ENS
19	smoke_before_pregyes	-1.39753	0.920764	-1.51779	0.132651	-3.22735	0.432296	9 months	Prenatal smoking		Parental	ENS
1	(Intercept)	13.3227	2.85742	4.66248	2.28451e-05	7.58615	19.0592	11 months	NA	***	NA	ENS
1	ageintrosolids	-1.07828	0.684923	-1.57431	0.1216	-2.45332	0.296762	11 months	Compelmentary foods age		Dietary	ENS
1	atopy_fatheryes	-1.41973	1.05236	-1.34909	0.183268	-3.53243	0.692976	11 months	Father's atopy		Parental	ENS
1	atopy_motheryes	-2.41456	1.03789	-2.32642	0.0240073	-4.49821	-0.330913	11 months	Mother's atopy	*	Parental	ENS
1	birthweight	-0.41451	0.677367	-0.611943	0.543294	-1.77438	0.94536	11 months	Birth weight		Perinatal	ENS
1	breastfeeding_11myes	1.45452	1.32	1.10191	0.275675	-1.19549	4.10453	11 months	Breastfeeding		Dietary	ENS
1	covid_270220yes	1.69085	1.24793	1.35493	0.181413	-0.814473	4.19618	11 months	Collected during pandemic		Environmental	ENS
1	daycare_14myes	-2.20215	1.24988	-1.76189	0.0840808	-4.71139	0.307085	11 months	Daycare		Environmental	ENS
1	delivery_placehospital	-3.8955	1.38171	-2.81933	0.00683563	-6.66941	-1.12159	11 months	Delivery place	**	Perinatal	ENS
1	delivery_typevaginal	0.547065	1.58949	0.344176	0.732129	-2.64397	3.7381	11 months	Delivery type		Perinatal	ENS
1	formulafeeding_11myes	2.93686	1.73342	1.69426	0.096315	-0.54312	6.41684	11 months	Formulafeeding		Dietary	ENS
1	furrypet_home_yn_14myes	-1.04596	1.22405	-0.854506	0.396821	-3.50334	1.41142	11 months	Pets		Environmental	ENS
1	hospitalyes	-2.12035	1.40496	-1.50919	0.13742	-4.94092	0.700215	11 months	Hospitalisation		Perinatal	ENS
1	inf_ab_11myes	-0.121384	1.9512	-0.0622097	0.950639	-4.03858	3.79582	11 months	Antibiotics		Infant's health	ENS
1	mat_AB_use_final_deliveryyes	4.07275	1.68112	2.42264	0.0189989	0.697755	7.44774	11 months	Intrapartum antibiotics	*	Parental	ENS
1	mat_AB_use_final_pregyes	0.117809	2.26616	0.0519863	0.958743	-4.4317	4.66731	11 months	Antepartum antibiotics		Parental	ENS
1	mat_weightgain	0.360015	0.479408	0.750957	0.45613	-0.602438	1.32247	11 months	Maternal weight gain		Parental	ENS
1	older_siblingsyes	0.694167	1.3009	0.533607	0.595932	-1.91749	3.30583	11 months	Older siblings		Environmental	ENS
1	pregn_weeks	0.29498	0.818904	0.360214	0.720175	-1.34904	1.939	11 months	Gestational age		Perinatal	ENS
1	sexmale	0.657613	1.09282	0.601756	0.550003	-1.53632	2.85155	11 months	Sex		Perinatal	ENS
1	smoke_before_pregyes	-1.55418	1.43682	-1.08168	0.284482	-4.43872	1.33036	11 months	Prenatal smoking		Parental	ENS
1	twins.siblings_in_luckiyes	-0.0859061	1.43396	-0.0599084	0.952463	-2.96469	2.79288	11 months	Siblings in cohort		Environmental	ENS
2	(Intercept)	13.352	2.77423	4.81286	1.32073e-05	7.78507	18.9189	11 months	NA	***	NA	ENS
2	ageintrosolids	-1.07498	0.675404	-1.59161	0.117534	-2.43028	0.280319	11 months	Compelmentary foods age		Dietary	ENS
2	atopy_fatheryes	-1.4254	1.0366	-1.37507	0.175005	-3.50549	0.654693	11 months	Father's atopy		Parental	ENS
2	atopy_motheryes	-2.41442	1.02788	-2.34893	0.0226628	-4.47702	-0.351823	11 months	Mother's atopy	*	Parental	ENS
2	birthweight	-0.415139	0.670733	-0.618934	0.538662	-1.76106	0.930784	11 months	Birth weight		Perinatal	ENS
2	breastfeeding_11myes	1.46416	1.29432	1.13122	0.263153	-1.13308	4.0614	11 months	Breastfeeding		Dietary	ENS
2	covid_270220yes	1.70604	1.20155	1.41987	0.161612	-0.705034	4.11712	11 months	Collected during pandemic		Environmental	ENS
2	daycare_14myes	-2.21394	1.21728	-1.81876	0.0747081	-4.65659	0.228704	11 months	Daycare		Environmental	ENS
2	delivery_placehospital	-3.89193	1.36671	-2.84767	0.00629244	-6.63443	-1.14943	11 months	Delivery place	**	Perinatal	ENS
2	delivery_typevaginal	0.524392	1.51375	0.346418	0.730427	-2.51318	3.56196	11 months	Delivery type		Perinatal	ENS
2	formulafeeding_11myes	2.93788	1.71661	1.71145	0.0929578	-0.50674	6.3825	11 months	Formulafeeding		Dietary	ENS
2	furrypet_home_yn_14myes	-1.04137	1.20911	-0.861276	0.39304	-3.46762	1.38488	11 months	Pets		Environmental	ENS
2	hospitalyes	-2.13064	1.37754	-1.5467	0.128	-4.89487	0.633594	11 months	Hospitalisation		Perinatal	ENS
2	inf_ab_11myes	-0.100744	1.89197	-0.0532481	0.957738	-3.89727	3.69578	11 months	Antibiotics		Infant's health	ENS
2	mat_AB_use_final_deliveryyes	4.09401	1.61491	2.53512	0.0142877	0.853446	7.33457	11 months	Intrapartum antibiotics	*	Parental	ENS
2	mat_weightgain	0.356688	0.47054	0.75804	0.451849	-0.587519	1.3009	11 months	Maternal weight gain		Parental	ENS
2	older_siblingsyes	0.688166	1.28328	0.536256	0.594068	-1.88692	3.26325	11 months	Older siblings		Environmental	ENS
2	pregn_weeks	0.298698	0.807914	0.369716	0.713096	-1.3225	1.9199	11 months	Gestational age		Perinatal	ENS
2	sexmale	0.656473	1.08208	0.60668	0.546703	-1.51487	2.82782	11 months	Sex		Perinatal	ENS
2	smoke_before_pregyes	-1.56573	1.40588	-1.1137	0.270531	-4.38684	1.25539	11 months	Prenatal smoking		Parental	ENS
2	twins.siblings_in_luckiyes	-0.0873107	1.41989	-0.0614913	0.951204	-2.93652	2.7619	11 months	Siblings in cohort		Environmental	ENS
3	(Intercept)	13.4202	2.69939	4.97156	6.85312e-06	8.01048	18.8299	11 months	NA	***	NA	ENS
3	ageintrosolids	-1.00862	0.653487	-1.54344	0.128458	-2.31824	0.300997	11 months	Compelmentary foods age		Dietary	ENS
3	atopy_fatheryes	-1.47456	1.00442	-1.46807	0.147781	-3.48746	0.538343	11 months	Father's atopy		Parental	ENS
3	atopy_motheryes	-2.24084	0.970012	-2.31012	0.0246599	-4.18479	-0.296893	11 months	Mother's atopy	*	Parental	ENS
3	birthweight	-0.443931	0.640972	-0.69259	0.491481	-1.72847	0.840606	11 months	Birth weight		Perinatal	ENS
3	breastfeeding_11myes	1.36141	1.2515	1.08782	0.28142	-1.14666	3.86947	11 months	Breastfeeding		Dietary	ENS
3	covid_270220yes	1.56905	1.13309	1.38475	0.171719	-0.701712	3.83982	11 months	Collected during pandemic		Environmental	ENS
3	daycare_14myes	-2.01432	1.14288	-1.76249	0.0835429	-4.30471	0.276071	11 months	Daycare		Environmental	ENS
3	delivery_placehospital	-3.90429	1.33515	-2.92423	0.00500657	-6.57999	-1.22858	11 months	Delivery place	**	Perinatal	ENS
3	delivery_typevaginal	0.537232	1.47965	0.36308	0.717937	-2.42806	3.50252	11 months	Delivery type		Perinatal	ENS
3	formulafeeding_11myes	2.85697	1.66881	1.71198	0.0925335	-0.487394	6.20134	11 months	Formulafeeding		Dietary	ENS
3	furrypet_home_yn_14myes	-0.86783	1.15863	-0.749016	0.457039	-3.18977	1.45411	11 months	Pets		Environmental	ENS
3	hospitalyes	-2.01106	1.28666	-1.56301	0.123785	-4.58958	0.567454	11 months	Hospitalisation		Perinatal	ENS
3	mat_AB_use_final_deliveryyes	3.95832	1.5486	2.55607	0.0133788	0.854863	7.06178	11 months	Intrapartum antibiotics	*	Parental	ENS
3	mat_weightgain	0.339459	0.454199	0.747379	0.458018	-0.570777	1.24969	11 months	Maternal weight gain		Parental	ENS
3	older_siblingsyes	0.553241	1.22336	0.452231	0.652881	-1.89843	3.00491	11 months	Older siblings		Environmental	ENS
3	pregn_weeks	0.326427	0.731946	0.445972	0.657369	-1.14042	1.79328	11 months	Gestational age		Perinatal	ENS
3	sexmale	0.497876	1.02547	0.48551	0.629243	-1.55721	2.55296	11 months	Sex		Perinatal	ENS
3	smoke_before_pregyes	-1.62298	1.34891	-1.20317	0.234063	-4.32626	1.08031	11 months	Prenatal smoking		Parental	ENS
3	twins.siblings_in_luckiyes	-0.18037	1.34606	-0.133998	0.893893	-2.87794	2.5172	11 months	Siblings in cohort		Environmental	ENS
4	(Intercept)	13.3653	2.64467	5.05369	4.94041e-06	8.06742	18.6632	11 months	NA	***	NA	ENS
4	ageintrosolids	-0.99666	0.641661	-1.55325	0.125997	-2.28206	0.288742	11 months	Compelmentary foods age		Dietary	ENS
4	atopy_fatheryes	-1.48759	0.990893	-1.50126	0.138905	-3.47259	0.497407	11 months	Father's atopy		Parental	ENS
4	atopy_motheryes	-2.2412	0.961466	-2.33103	0.0233775	-4.16725	-0.315154	11 months	Mother's atopy	*	Parental	ENS
4	birthweight	-0.431461	0.628595	-0.686389	0.4953	-1.69069	0.827767	11 months	Birth weight		Perinatal	ENS
4	breastfeeding_11myes	1.35048	1.23785	1.09099	0.279948	-1.12922	3.83018	11 months	Breastfeeding		Dietary	ENS
4	covid_270220yes	1.60899	1.08357	1.4849	0.143179	-0.561662	3.77964	11 months	Collected during pandemic		Environmental	ENS
4	daycare_14myes	-2.035	1.12244	-1.81301	0.0751914	-4.28352	0.213525	11 months	Daycare		Environmental	ENS
4	delivery_placehospital	-3.86346	1.28846	-2.9985	0.00404159	-6.44456	-1.28235	11 months	Delivery place	**	Perinatal	ENS
4	delivery_typevaginal	0.555056	1.46068	0.379998	0.705385	-2.37104	3.48115	11 months	Delivery type		Perinatal	ENS
4	formulafeeding_11myes	2.83786	1.64806	1.72194	0.0906	-0.463597	6.13931	11 months	Formulafeeding		Dietary	ENS
4	furrypet_home_yn_14myes	-0.859395	1.14673	-0.749434	0.456733	-3.15656	1.43777	11 months	Pets		Environmental	ENS
4	hospitalyes	-2.02933	1.26814	-1.60024	0.115173	-4.56973	0.511065	11 months	Hospitalisation		Perinatal	ENS
4	mat_AB_use_final_deliveryyes	3.94618	1.53233	2.57528	0.012684	0.876556	7.0158	11 months	Intrapartum antibiotics	*	Parental	ENS
4	mat_weightgain	0.341084	0.450039	0.7579	0.451689	-0.560451	1.24262	11 months	Maternal weight gain		Parental	ENS
4	older_siblingsyes	0.559074	1.21182	0.461352	0.646333	-1.86849	2.98664	11 months	Older siblings		Environmental	ENS
4	pregn_weeks	0.336071	0.721983	0.465484	0.64339	-1.11023	1.78238	11 months	Gestational age		Perinatal	ENS
4	sexmale	0.489121	1.01437	0.482191	0.63155	-1.54291	2.52116	11 months	Sex		Perinatal	ENS
4	smoke_before_pregyes	-1.57525	1.28959	-1.22152	0.227008	-4.1586	1.0081	11 months	Prenatal smoking		Parental	ENS
5	(Intercept)	13.8933	2.23337	6.22076	6.23982e-08	9.42102	18.3655	11 months	NA	***	NA	ENS
5	ageintrosolids	-1.00542	0.636416	-1.57981	0.119684	-2.27982	0.268984	11 months	Compelmentary foods age		Dietary	ENS
5	atopy_fatheryes	-1.44426	0.976894	-1.47842	0.144801	-3.40045	0.511939	11 months	Father's atopy		Parental	ENS
5	atopy_motheryes	-2.15557	0.927644	-2.32371	0.0237304	-4.01315	-0.297997	11 months	Mother's atopy	*	Parental	ENS
5	birthweight	-0.498963	0.598431	-0.833784	0.407883	-1.6973	0.699375	11 months	Birth weight		Perinatal	ENS
5	breastfeeding_11myes	1.25613	1.20355	1.04368	0.301038	-1.15394	3.66619	11 months	Breastfeeding		Dietary	ENS
5	covid_270220yes	1.61111	1.07539	1.49816	0.13961	-0.542326	3.76454	11 months	Collected during pandemic		Environmental	ENS
5	daycare_14myes	-1.98705	1.10693	-1.79511	0.0779387	-4.20363	0.229529	11 months	Daycare		Environmental	ENS
5	delivery_placehospital	-3.9408	1.2627	-3.12093	0.00282898	-6.46932	-1.41229	11 months	Delivery place	**	Perinatal	ENS
5	formulafeeding_11myes	2.70765	1.5999	1.69239	0.0960318	-0.496089	5.91139	11 months	Formulafeeding		Dietary	ENS
5	furrypet_home_yn_14myes	-0.881991	1.13656	-0.776021	0.440945	-3.15791	1.39392	11 months	Pets		Environmental	ENS
5	hospitalyes	-2.01115	1.25769	-1.59908	0.115332	-4.52964	0.507337	11 months	Hospitalisation		Perinatal	ENS
5	mat_AB_use_final_deliveryyes	3.8519	1.50072	2.5667	0.0129179	0.846764	6.85703	11 months	Intrapartum antibiotics	*	Parental	ENS
5	mat_weightgain	0.29694	0.431511	0.68814	0.494156	-0.567146	1.16102	11 months	Maternal weight gain		Parental	ENS
5	older_siblingsyes	0.632478	1.18731	0.532698	0.596313	-1.74507	3.01002	11 months	Older siblings		Environmental	ENS
5	pregn_weeks	0.435595	0.667735	0.652346	0.5168	-0.901523	1.77271	11 months	Gestational age		Perinatal	ENS
5	sexmale	0.538621	0.998396	0.539487	0.591652	-1.46063	2.53787	11 months	Sex		Perinatal	ENS
5	smoke_before_pregyes	-1.6777	1.25159	-1.34046	0.185414	-4.18396	0.828555	11 months	Prenatal smoking		Parental	ENS
6	(Intercept)	14.3727	2.03134	7.07548	2.18903e-09	10.3065	18.4389	11 months	NA	***	NA	ENS
6	ageintrosolids	-0.967013	0.628403	-1.53884	0.129281	-2.2249	0.290873	11 months	Compelmentary foods age		Dietary	ENS
6	atopy_fatheryes	-1.56632	0.943757	-1.65967	0.10238	-3.45546	0.322813	11 months	Father's atopy		Parental	ENS
6	atopy_motheryes	-2.1029	0.916646	-2.29412	0.0254235	-3.93776	-0.26803	11 months	Mother's atopy	*	Parental	ENS
6	birthweight	-0.493181	0.594627	-0.829396	0.410281	-1.68346	0.697094	11 months	Birth weight		Perinatal	ENS
6	breastfeeding_11myes	1.37412	1.17566	1.1688	0.247264	-0.979227	3.72747	11 months	Breastfeeding		Dietary	ENS
6	covid_270220yes	1.40503	0.99718	1.409	0.164175	-0.591048	3.4011	11 months	Collected during pandemic		Environmental	ENS
6	daycare_14myes	-1.86599	1.07664	-1.73317	0.0883799	-4.02111	0.289131	11 months	Daycare		Environmental	ENS
6	delivery_placehospital	-4.03789	1.24174	-3.25181	0.0019129	-6.5235	-1.55228	11 months	Delivery place	**	Perinatal	ENS
6	formulafeeding_11myes	2.64851	1.58616	1.66977	0.100355	-0.526525	5.82354	11 months	Formulafeeding		Dietary	ENS
6	furrypet_home_yn_14myes	-1.05303	1.08351	-0.971875	0.335148	-3.22191	1.11584	11 months	Pets		Environmental	ENS
6	hospitalyes	-2.13796	1.22731	-1.74199	0.0868114	-4.59469	0.318767	11 months	Hospitalisation		Perinatal	ENS
6	mat_AB_use_final_deliveryyes	3.77062	1.48369	2.54137	0.0137378	0.800684	6.74056	11 months	Intrapartum antibiotics	*	Parental	ENS
6	mat_weightgain	0.345417	0.419193	0.824006	0.413312	-0.493688	1.18452	11 months	Maternal weight gain		Parental	ENS
6	pregn_weeks	0.379984	0.65544	0.57974	0.564335	-0.932021	1.69199	11 months	Gestational age		Perinatal	ENS
6	sexmale	0.473031	0.984638	0.480411	0.632742	-1.49794	2.444	11 months	Sex		Perinatal	ENS
6	smoke_before_pregyes	-1.60041	1.23545	-1.29541	0.200312	-4.07343	0.872609	11 months	Prenatal smoking		Parental	ENS
7	(Intercept)	14.56	1.98054	7.35154	6.86535e-10	10.597	18.5231	11 months	NA	***	NA	ENS
7	ageintrosolids	-0.885071	0.600856	-1.47302	0.146062	-2.08738	0.31724	11 months	Compelmentary foods age		Dietary	ENS
7	atopy_fatheryes	-1.59673	0.935474	-1.70687	0.093105	-3.46861	0.275148	11 months	Father's atopy		Parental	ENS
7	atopy_motheryes	-2.08946	0.910227	-2.29554	0.0252738	-3.91082	-0.268101	11 months	Mother's atopy	*	Parental	ENS
7	birthweight	-0.43398	0.577913	-0.750943	0.455672	-1.59038	0.722422	11 months	Birth weight		Perinatal	ENS
7	breastfeeding_11myes	1.36634	1.16786	1.16995	0.246725	-0.970547	3.70324	11 months	Breastfeeding		Dietary	ENS
7	covid_270220yes	1.44065	0.987916	1.45827	0.150069	-0.536165	3.41747	11 months	Collected during pandemic		Environmental	ENS
7	daycare_14myes	-1.90186	1.06702	-1.7824	0.0798293	-4.03696	0.233245	11 months	Daycare		Environmental	ENS
7	delivery_placehospital	-3.971	1.22584	-3.23942	0.00196927	-6.4239	-1.51811	11 months	Delivery place	**	Perinatal	ENS
7	formulafeeding_11myes	2.72554	1.56771	1.73855	0.0873298	-0.411434	5.86252	11 months	Formulafeeding		Dietary	ENS
7	furrypet_home_yn_14myes	-1.02808	1.07518	-0.956189	0.342879	-3.17951	1.12336	11 months	Pets		Environmental	ENS
7	hospitalyes	-2.16932	1.21756	-1.7817	0.0799456	-4.60565	0.267011	11 months	Hospitalisation		Perinatal	ENS
7	mat_AB_use_final_deliveryyes	3.65299	1.45378	2.51275	0.0147322	0.743984	6.56201	11 months	Intrapartum antibiotics	*	Parental	ENS
7	mat_weightgain	0.305199	0.408062	0.747923	0.457478	-0.511331	1.12173	11 months	Maternal weight gain		Parental	ENS
7	pregn_weeks	0.291225	0.624748	0.466148	0.642826	-0.958893	1.54134	11 months	Gestational age		Perinatal	ENS
7	smoke_before_pregyes	-1.55274	1.2234	-1.2692	0.209354	-4.00077	0.895281	11 months	Prenatal smoking		Parental	ENS
8	(Intercept)	14.5979	1.96592	7.42547	4.69502e-10	10.6655	18.5303	11 months	NA	***	NA	ENS
8	ageintrosolids	-0.877525	0.596708	-1.47061	0.146622	-2.07112	0.316069	11 months	Compelmentary foods age		Dietary	ENS
8	atopy_fatheryes	-1.6863	0.909536	-1.85402	0.0686535	-3.50564	0.133045	11 months	Father's atopy		Parental	ENS
8	atopy_motheryes	-2.09295	0.90424	-2.3146	0.0240745	-3.9017	-0.284202	11 months	Mother's atopy	*	Parental	ENS
8	birthweight	-0.282108	0.474199	-0.594915	0.554138	-1.23065	0.666432	11 months	Birth weight		Perinatal	ENS
8	breastfeeding_11myes	1.38834	1.15927	1.1976	0.235783	-0.930549	3.70724	11 months	Breastfeeding		Dietary	ENS
8	covid_270220yes	1.44605	0.981383	1.47348	0.145848	-0.517006	3.40911	11 months	Collected during pandemic		Environmental	ENS
8	daycare_14myes	-1.94821	1.05542	-1.84591	0.0698403	-4.05937	0.162945	11 months	Daycare		Environmental	ENS
8	delivery_placehospital	-3.99555	1.21669	-3.28395	0.00171092	-6.4293	-1.5618	11 months	Delivery place	**	Perinatal	ENS
8	formulafeeding_11myes	2.85868	1.53139	1.86673	0.0668283	-0.20455	5.92191	11 months	Formulafeeding		Dietary	ENS
8	furrypet_home_yn_14myes	-1.00629	1.06714	-0.942979	0.349473	-3.14088	1.1283	11 months	Pets		Environmental	ENS
8	hospitalyes	-2.37734	1.12541	-2.11242	0.0388215	-4.62851	-0.126181	11 months	Hospitalisation	*	Perinatal	ENS
8	mat_AB_use_final_deliveryyes	3.56475	1.43197	2.4894	0.0155859	0.70038	6.42912	11 months	Intrapartum antibiotics	*	Parental	ENS
8	mat_weightgain	0.334877	0.400427	0.836299	0.406305	-0.466096	1.13585	11 months	Maternal weight gain		Parental	ENS
8	smoke_before_pregyes	-1.36705	1.14916	-1.18961	0.238888	-3.66571	0.931615	11 months	Prenatal smoking		Parental	ENS
9	(Intercept)	14.5509	1.95391	7.4471	3.94052e-10	10.6439	18.458	11 months	NA	***	NA	ENS
9	ageintrosolids	-0.897353	0.592613	-1.51423	0.135132	-2.08236	0.287649	11 months	Compelmentary foods age		Dietary	ENS
9	atopy_fatheryes	-1.67545	0.904525	-1.8523	0.0688229	-3.48416	0.133258	11 months	Father's atopy		Parental	ENS
9	atopy_motheryes	-2.04784	0.896271	-2.28485	0.0258128	-3.84005	-0.25564	11 months	Mother's atopy	*	Parental	ENS
9	breastfeeding_11myes	1.41694	1.15213	1.22985	0.223477	-0.886881	3.72076	11 months	Breastfeeding		Dietary	ENS
9	covid_270220yes	1.3807	0.970037	1.42334	0.159731	-0.559012	3.3204	11 months	Collected during pandemic		Environmental	ENS
9	daycare_14myes	-1.98803	1.04771	-1.8975	0.0624973	-4.08304	0.106993	11 months	Daycare		Environmental	ENS
9	delivery_placehospital	-4.08143	1.20168	-3.39642	0.00120641	-6.48434	-1.67851	11 months	Delivery place	**	Perinatal	ENS
9	formulafeeding_11myes	2.9444	1.5165	1.94158	0.0568107	-0.0880236	5.97682	11 months	Formulafeeding		Dietary	ENS
9	furrypet_home_yn_14myes	-0.948812	1.05711	-0.897552	0.372953	-3.06264	1.16501	11 months	Pets		Environmental	ENS
9	hospitalyes	-2.24931	1.09878	-2.0471	0.0449626	-4.44645	-0.052165	11 months	Hospitalisation	*	Perinatal	ENS
9	mat_AB_use_final_deliveryyes	3.49593	1.41971	2.46242	0.0166401	0.657044	6.33483	11 months	Intrapartum antibiotics	*	Parental	ENS
9	mat_weightgain	0.260211	0.37823	0.687969	0.49408	-0.496108	1.01653	11 months	Maternal weight gain		Parental	ENS
9	smoke_before_pregyes	-1.41067	1.14073	-1.23664	0.22096	-3.6917	0.870354	11 months	Prenatal smoking		Parental	ENS
10	(Intercept)	14.5838	1.94501	7.4981	2.94275e-10	10.6958	18.4719	11 months	NA	***	NA	ENS
10	ageintrosolids	-0.83105	0.582235	-1.42735	0.158498	-1.99492	0.33282	11 months	Compelmentary foods age		Dietary	ENS
10	atopy_fatheryes	-1.68977	0.900437	-1.87661	0.0652792	-3.48972	0.110176	11 months	Father's atopy		Parental	ENS
10	atopy_motheryes	-1.96048	0.883452	-2.21911	0.0301477	-3.72648	-0.194484	11 months	Mother's atopy	*	Parental	ENS
10	breastfeeding_11myes	1.42268	1.14719	1.24014	0.219595	-0.870521	3.71589	11 months	Breastfeeding		Dietary	ENS
10	covid_270220yes	1.42331	0.963936	1.47656	0.144854	-0.503568	3.35019	11 months	Collected during pandemic		Environmental	ENS
10	daycare_14myes	-2.05708	1.03845	-1.98091	0.0520414	-4.1329	0.0187531	11 months	Daycare		Environmental	ENS
10	delivery_placehospital	-4.23815	1.17487	-3.60734	0.00061858	-6.58669	-1.88962	11 months	Delivery place	***	Perinatal	ENS
10	formulafeeding_11myes	2.88905	1.50792	1.91592	0.0599885	-0.125228	5.90333	11 months	Formulafeeding		Dietary	ENS
10	furrypet_home_yn_14myes	-0.87729	1.04751	-0.837502	0.405528	-2.97123	1.21665	11 months	Pets		Environmental	ENS
10	hospitalyes	-2.08558	1.06813	-1.95255	0.0553912	-4.22074	0.049582	11 months	Hospitalisation		Perinatal	ENS
10	mat_AB_use_final_deliveryyes	3.57112	1.40947	2.53366	0.0138299	0.753625	6.38862	11 months	Intrapartum antibiotics	*	Parental	ENS
10	smoke_before_pregyes	-1.30624	1.12577	-1.16031	0.250373	-3.55662	0.944145	11 months	Prenatal smoking		Parental	ENS
11	(Intercept)	14.1649	1.87513	7.5541	2.15109e-10	10.4178	17.9121	11 months	NA	***	NA	ENS
11	ageintrosolids	-0.790396	0.578831	-1.3655	0.17695	-1.9471	0.366305	11 months	Compelmentary foods age		Dietary	ENS
11	atopy_fatheryes	-1.66334	0.897748	-1.85279	0.0685974	-3.45735	0.130667	11 months	Father's atopy		Parental	ENS
11	atopy_motheryes	-1.91288	0.87953	-2.17488	0.0334006	-3.67048	-0.155275	11 months	Mother's atopy	*	Parental	ENS
11	breastfeeding_11myes	1.42271	1.14447	1.24312	0.218431	-0.864331	3.70975	11 months	Breastfeeding		Dietary	ENS
11	covid_270220yes	1.56558	0.9466	1.65389	0.103124	-0.326054	3.4572	11 months	Collected during pandemic		Environmental	ENS
11	daycare_14myes	-1.94786	1.02778	-1.89521	0.0626554	-4.00172	0.106	11 months	Daycare		Environmental	ENS
11	delivery_placehospital	-4.20835	1.17154	-3.59214	0.000642961	-6.5495	-1.86721	11 months	Delivery place	***	Perinatal	ENS
11	formulafeeding_11myes	3.02363	1.49577	2.02145	0.0474861	0.034569	6.01269	11 months	Formulafeeding	*	Dietary	ENS
11	hospitalyes	-2.29459	1.0361	-2.21464	0.03041	-4.36507	-0.224105	11 months	Hospitalisation	*	Perinatal	ENS
11	mat_AB_use_final_deliveryyes	3.40689	1.39246	2.44668	0.0172201	0.624294	6.18949	11 months	Intrapartum antibiotics	*	Parental	ENS
11	smoke_before_pregyes	-1.24328	1.12059	-1.10948	0.27144	-3.4826	0.99605	11 months	Prenatal smoking		Parental	ENS
12	(Intercept)	14.0119	1.87342	7.47928	2.66984e-10	10.2693	17.7544	11 months	NA	***	NA	ENS
12	ageintrosolids	-0.754047	0.578945	-1.30245	0.19743	-1.91062	0.402528	11 months	Compelmentary foods age		Dietary	ENS
12	atopy_fatheryes	-1.7782	0.893367	-1.99044	0.0508163	-3.5629	0.00650797	11 months	Father's atopy		Parental	ENS
12	atopy_motheryes	-1.84338	0.878879	-2.09742	0.039911	-3.59914	-0.0876199	11 months	Mother's atopy	*	Parental	ENS
12	breastfeeding_11myes	1.45715	1.14611	1.27138	0.208194	-0.832477	3.74677	11 months	Breastfeeding		Dietary	ENS
12	covid_270220yes	1.71031	0.939258	1.82092	0.0732947	-0.166074	3.58669	11 months	Collected during pandemic		Environmental	ENS
12	daycare_14myes	-1.89023	1.02832	-1.83817	0.0706787	-3.94454	0.164077	11 months	Daycare		Environmental	ENS
12	delivery_placehospital	-4.22872	1.17351	-3.60347	0.000614346	-6.57308	-1.88436	11 months	Delivery place	***	Perinatal	ENS
12	formulafeeding_11myes	2.89251	1.49378	1.93636	0.0572415	-0.091668	5.87668	11 months	Formulafeeding		Dietary	ENS
12	hospitalyes	-2.32509	1.0376	-2.24083	0.0285143	-4.39794	-0.252245	11 months	Hospitalisation	*	Perinatal	ENS
12	mat_AB_use_final_deliveryyes	3.19869	1.38224	2.31414	0.0238819	0.43735	5.96003	11 months	Intrapartum antibiotics	*	Parental	ENS
13	(Intercept)	15.3404	1.56229	9.81917	1.83168e-14	12.2203	18.4605	11 months	NA	***	NA	ENS
13	ageintrosolids	-0.497357	0.545166	-0.912303	0.36498	-1.58613	0.591415	11 months	Compelmentary foods age		Dietary	ENS
13	atopy_fatheryes	-1.73162	0.896838	-1.9308	0.0578715	-3.52272	0.0594933	11 months	Father's atopy		Parental	ENS
13	atopy_motheryes	-1.65226	0.870023	-1.8991	0.0619914	-3.38981	0.0852987	11 months	Mother's atopy		Parental	ENS
13	covid_270220yes	1.72408	0.943638	1.82706	0.0722825	-0.160494	3.60866	11 months	Collected during pandemic		Environmental	ENS
13	daycare_14myes	-1.90927	1.03308	-1.84814	0.0691318	-3.97247	0.153923	11 months	Daycare		Environmental	ENS
13	delivery_placehospital	-4.53792	1.15347	-3.93416	0.000205625	-6.84155	-2.23429	11 months	Delivery place	***	Perinatal	ENS
13	formulafeeding_11myes	1.98932	1.32026	1.50676	0.136717	-0.64743	4.62607	11 months	Formulafeeding		Dietary	ENS
13	hospitalyes	-2.02934	1.01597	-1.99743	0.049967	-4.05838	-0.000301003	11 months	Hospitalisation	*	Perinatal	ENS
13	mat_AB_use_final_deliveryyes	3.30907	1.38604	2.38743	0.0198838	0.540963	6.07717	11 months	Intrapartum antibiotics	*	Parental	ENS
14	(Intercept)	14.9896	1.51232	9.91169	1.0763e-14	11.9702	18.0091	11 months	NA	***	NA	ENS
14	atopy_fatheryes	-1.56636	0.877237	-1.78556	0.0787649	-3.31782	0.185102	11 months	Father's atopy		Parental	ENS
14	atopy_motheryes	-1.57948	0.865257	-1.82545	0.0724583	-3.30702	0.14806	11 months	Mother's atopy		Parental	ENS
14	covid_270220yes	1.84323	0.933369	1.97482	0.0524746	-0.0202973	3.70676	11 months	Collected during pandemic		Environmental	ENS
14	daycare_14myes	-2.11533	1.0068	-2.10104	0.0394605	-4.12547	-0.105184	11 months	Daycare	*	Environmental	ENS
14	delivery_placehospital	-4.68226	1.14111	-4.10325	0.000114255	-6.96056	-2.40396	11 months	Delivery place	***	Perinatal	ENS
14	formulafeeding_11myes	2.4743	1.20697	2.05001	0.0443401	0.0645038	4.8841	11 months	Formulafeeding	*	Dietary	ENS
14	hospitalyes	-1.91214	1.00654	-1.89972	0.0618401	-3.92176	0.097474	11 months	Hospitalisation		Perinatal	ENS
14	mat_AB_use_final_deliveryyes	3.24086	1.38226	2.34461	0.0220649	0.481093	6.00063	11 months	Intrapartum antibiotics	*	Parental	ENS
1	(Intercept)	10.4689	3.55102	2.94814	0.00484892	3.33646	17.6013	14 months	NA	**	NA	ENS
1	ageintrosolids	0.243346	0.70176	0.346765	0.730223	-1.16618	1.65287	14 months	Compelmentary foods age		Dietary	ENS
1	atopy_fatheryes	1.01511	1.36409	0.744169	0.460258	-1.72474	3.75496	14 months	Father's atopy		Parental	ENS
1	atopy_motheryes	-3.0548	1.29284	-2.36286	0.0220656	-5.65156	-0.458051	14 months	Mother's atopy	*	Parental	ENS
1	birthweight	0.146409	0.842259	0.173829	0.862702	-1.54532	1.83814	14 months	Birth weight		Perinatal	ENS
1	breastfeeding_14myes	-0.00643247	2.21149	-0.00290866	0.997691	-4.44834	4.43548	14 months	Breastfeeding		Dietary	ENS
1	covid_270220yes	0.514192	1.37788	0.373177	0.710594	-2.25336	3.28174	14 months	Collected during pandemic		Environmental	ENS
1	daycare_14myes	-0.439752	1.61568	-0.272177	0.786606	-3.68494	2.80544	14 months	Daycare		Environmental	ENS
1	delivery_placehospital	1.98919	1.91341	1.03961	0.303524	-1.854	5.83238	14 months	Delivery place		Perinatal	ENS
1	delivery_typevaginal	1.61287	1.86977	0.862604	0.392474	-2.14267	5.36842	14 months	Delivery type		Perinatal	ENS
1	formulafeeding_14myes	0.893361	2.45959	0.363215	0.717975	-4.04688	5.8336	14 months	Formulafeeding		Dietary	ENS
1	furrypet_home_yn_14myes	-1.26379	1.52139	-0.830683	0.410102	-4.31958	1.792	14 months	Pets		Environmental	ENS
1	hospitalyes	-2.6054	1.4664	-1.77673	0.0816967	-5.55076	0.339955	14 months	Hospitalisation		Perinatal	ENS
1	inf_ab_14myes	0.0971767	2.65811	0.0365586	0.970983	-5.2418	5.43615	14 months	Antibiotics		Infant's health	ENS
1	mat_AB_use_final_deliveryyes	-0.99215	2.03146	-0.488392	0.627408	-5.07246	3.08816	14 months	Intrapartum antibiotics		Parental	ENS
1	mat_AB_use_final_pregyes	0.0330044	2.37219	0.013913	0.988955	-4.73169	4.7977	14 months	Antepartum antibiotics		Parental	ENS
1	mat_weightgain	0.322502	0.705834	0.456909	0.649715	-1.09521	1.74021	14 months	Maternal weight gain		Parental	ENS
1	older_siblingsyes	1.0643	1.71608	0.620192	0.537948	-2.38254	4.51114	14 months	Older siblings		Environmental	ENS
1	pregn_weeks	0.243351	0.911716	0.266916	0.790632	-1.58788	2.07459	14 months	Gestational age		Perinatal	ENS
1	sexmale	-0.49987	1.31648	-0.379703	0.705774	-3.14409	2.14435	14 months	Sex		Perinatal	ENS
1	smoke_before_pregyes	0.607624	1.91099	0.317963	0.751837	-3.23071	4.44596	14 months	Prenatal smoking		Parental	ENS
1	twins.siblings_in_luckiyes	1.96917	1.99783	0.985652	0.32905	-2.0436	5.98193	14 months	Siblings in cohort		Environmental	ENS
2	(Intercept)	10.4645	3.18925	3.28119	0.00186862	4.06185	16.8672	14 months	NA	**	NA	ENS
2	ageintrosolids	0.242799	0.669423	0.362699	0.718329	-1.10112	1.58672	14 months	Compelmentary foods age		Dietary	ENS
2	atopy_fatheryes	1.01429	1.32109	0.767763	0.446169	-1.63792	3.66649	14 months	Father's atopy		Parental	ENS
2	atopy_motheryes	-3.05552	1.25676	-2.43127	0.0185991	-5.57857	-0.532473	14 months	Mother's atopy	*	Parental	ENS
2	birthweight	0.146273	0.832671	0.175667	0.861251	-1.52538	1.81793	14 months	Birth weight		Perinatal	ENS
2	covid_270220yes	0.514016	1.36299	0.377124	0.707646	-2.2223	3.25033	14 months	Collected during pandemic		Environmental	ENS
2	daycare_14myes	-0.439862	1.59932	-0.27503	0.784404	-3.65064	2.77091	14 months	Daycare		Environmental	ENS
2	delivery_placehospital	1.99094	1.79873	1.10686	0.27355	-1.62017	5.60205	14 months	Delivery place		Perinatal	ENS
2	delivery_typevaginal	1.61234	1.84256	0.875056	0.385646	-2.08675	5.31144	14 months	Delivery type		Perinatal	ENS
2	formulafeeding_14myes	0.897862	1.89298	0.47431	0.637303	-2.90246	4.69819	14 months	Formulafeeding		Dietary	ENS
2	furrypet_home_yn_14myes	-1.26493	1.45564	-0.868984	0.388927	-4.18725	1.65739	14 months	Pets		Environmental	ENS
2	hospitalyes	-2.60678	1.37418	-1.89697	0.063502	-5.36557	0.152008	14 months	Hospitalisation		Perinatal	ENS
2	inf_ab_14myes	0.0989829	2.55909	0.038679	0.969297	-5.0386	5.23657	14 months	Antibiotics		Infant's health	ENS
2	mat_AB_use_final_deliveryyes	-0.992564	2.00649	-0.494678	0.622952	-5.02076	3.03563	14 months	Intrapartum antibiotics		Parental	ENS
2	mat_AB_use_final_pregyes	0.0308442	2.23075	0.0138269	0.989022	-4.44756	4.50925	14 months	Antepartum antibiotics		Parental	ENS
2	mat_weightgain	0.322717	0.695039	0.464315	0.644398	-1.07263	1.71807	14 months	Maternal weight gain		Parental	ENS
2	older_siblingsyes	1.06226	1.55172	0.684572	0.496713	-2.05294	4.17747	14 months	Older siblings		Environmental	ENS
2	pregn_weeks	0.243501	0.901284	0.270172	0.788119	-1.5659	2.0529	14 months	Gestational age		Perinatal	ENS
2	sexmale	-0.499366	1.2922	-0.386446	0.700774	-3.09357	2.09484	14 months	Sex		Perinatal	ENS
2	smoke_before_pregyes	0.607461	1.89134	0.321179	0.749387	-3.18957	4.40449	14 months	Prenatal smoking		Parental	ENS
2	twins.siblings_in_luckiyes	1.96784	1.926	1.02173	0.311733	-1.89876	5.83444	14 months	Siblings in cohort		Environmental	ENS
3	(Intercept)	10.4722	3.11066	3.36655	0.00143792	4.23019	16.7142	14 months	NA	**	NA	ENS
3	ageintrosolids	0.243295	0.662003	0.367513	0.714728	-1.08511	1.5717	14 months	Compelmentary foods age		Dietary	ENS
3	atopy_fatheryes	1.01569	1.30446	0.778629	0.439727	-1.6019	3.63328	14 months	Father's atopy		Parental	ENS
3	atopy_motheryes	-3.05406	1.24023	-2.4625	0.0171471	-5.54276	-0.565363	14 months	Mother's atopy	*	Parental	ENS
3	birthweight	0.145863	0.824105	0.176996	0.860199	-1.50782	1.79955	14 months	Birth weight		Perinatal	ENS
3	covid_270220yes	0.5171	1.33163	0.388321	0.699364	-2.15501	3.18921	14 months	Collected during pandemic		Environmental	ENS
3	daycare_14myes	-0.444206	1.55302	-0.286028	0.775993	-3.56056	2.67215	14 months	Daycare		Environmental	ENS
3	delivery_placehospital	1.99338	1.77273	1.12447	0.265976	-1.56385	5.55062	14 months	Delivery place		Perinatal	ENS
3	delivery_typevaginal	1.60569	1.76138	0.911607	0.366182	-1.92878	5.14015	14 months	Delivery type		Perinatal	ENS
3	formulafeeding_14myes	0.897869	1.8747	0.478941	0.633989	-2.86399	4.65973	14 months	Formulafeeding		Dietary	ENS
3	furrypet_home_yn_14myes	-1.2653	1.44134	-0.877861	0.384057	-4.15755	1.62696	14 months	Pets		Environmental	ENS
3	hospitalyes	-2.60959	1.34596	-1.93883	0.0579583	-5.31046	0.0912834	14 months	Hospitalisation		Perinatal	ENS
3	inf_ab_14myes	0.100086	2.53313	0.0395107	0.968635	-4.98302	5.18319	14 months	Antibiotics		Infant's health	ENS
3	mat_AB_use_final_deliveryyes	-0.986966	1.94622	-0.507119	0.614215	-4.89234	2.91841	14 months	Intrapartum antibiotics		Parental	ENS
3	mat_weightgain	0.322241	0.687482	0.468727	0.641224	-1.05729	1.70177	14 months	Maternal weight gain		Parental	ENS
3	older_siblingsyes	1.06195	1.53656	0.69112	0.492564	-2.02139	4.14529	14 months	Older siblings		Environmental	ENS
3	pregn_weeks	0.243291	0.892451	0.27261	0.786232	-1.54754	2.03412	14 months	Gestational age		Perinatal	ENS
3	sexmale	-0.497164	1.26996	-0.39148	0.697042	-3.04553	2.0512	14 months	Sex		Perinatal	ENS
3	smoke_before_pregyes	0.601596	1.82535	0.329577	0.743043	-3.06125	4.26444	14 months	Prenatal smoking		Parental	ENS
3	twins.siblings_in_luckiyes	1.96607	1.90319	1.03304	0.306365	-1.85296	5.7851	14 months	Siblings in cohort		Environmental	ENS
4	(Intercept)	10.495	3.02741	3.46668	0.00105319	4.42283	16.5673	14 months	NA	**	NA	ENS
4	ageintrosolids	0.238899	0.646414	0.369576	0.713171	-1.05764	1.53544	14 months	Compelmentary foods age		Dietary	ENS
4	atopy_fatheryes	1.00096	1.23824	0.808374	0.422489	-1.48264	3.48457	14 months	Father's atopy		Parental	ENS
4	atopy_motheryes	-3.05969	1.22035	-2.50722	0.0152688	-5.50741	-0.611972	14 months	Mother's atopy	*	Parental	ENS
4	birthweight	0.149986	0.809736	0.185228	0.853757	-1.47414	1.77411	14 months	Birth weight		Perinatal	ENS
4	covid_270220yes	0.52501	1.30403	0.402605	0.688858	-2.09055	3.14057	14 months	Collected during pandemic		Environmental	ENS
4	daycare_14myes	-0.443223	1.53812	-0.288159	0.774349	-3.5283	2.64186	14 months	Daycare		Environmental	ENS
4	delivery_placehospital	1.99408	1.75586	1.13567	0.261203	-1.52773	5.51589	14 months	Delivery place		Perinatal	ENS
4	delivery_typevaginal	1.59624	1.72857	0.923448	0.359959	-1.87082	5.0633	14 months	Delivery type		Perinatal	ENS
4	formulafeeding_14myes	0.90588	1.84606	0.490709	0.625658	-2.79686	4.60862	14 months	Formulafeeding		Dietary	ENS
4	furrypet_home_yn_14myes	-1.25684	1.41186	-0.890197	0.377383	-4.08868	1.575	14 months	Pets		Environmental	ENS
4	hospitalyes	-2.61341	1.32977	-1.96531	0.0546286	-5.2806	0.0537717	14 months	Hospitalisation		Perinatal	ENS
4	mat_AB_use_final_deliveryyes	-0.987704	1.92771	-0.51237	0.61052	-4.85421	2.8788	14 months	Intrapartum antibiotics		Parental	ENS
4	mat_weightgain	0.318885	0.675757	0.471893	0.63894	-1.03651	1.67428	14 months	Maternal weight gain		Parental	ENS
4	older_siblingsyes	1.07297	1.49672	0.71688	0.476596	-1.92908	4.07502	14 months	Older siblings		Environmental	ENS
4	pregn_weeks	0.23335	0.848148	0.27513	0.784286	-1.46782	1.93452	14 months	Gestational age		Perinatal	ENS
4	sexmale	-0.506827	1.23439	-0.410588	0.68303	-2.98271	1.96905	14 months	Sex		Perinatal	ENS
4	smoke_before_pregyes	0.58708	1.77108	0.331481	0.741588	-2.96526	4.13942	14 months	Prenatal smoking		Parental	ENS
4	twins.siblings_in_luckiyes	1.95034	1.84347	1.05797	0.294865	-1.74719	5.64787	14 months	Siblings in cohort		Environmental	ENS
5	(Intercept)	10.5963	2.95088	3.5909	0.000711652	4.68016	16.5125	14 months	NA	***	NA	ENS
5	ageintrosolids	0.237697	0.640576	0.371068	0.712039	-1.04658	1.52197	14 months	Compelmentary foods age		Dietary	ENS
5	atopy_fatheryes	1.0079	1.22656	0.821733	0.414842	-1.4512	3.46701	14 months	Father's atopy		Parental	ENS
5	atopy_motheryes	-3.05801	1.20936	-2.52862	0.0144062	-5.48263	-0.633393	14 months	Mother's atopy	*	Parental	ENS
5	covid_270220yes	0.522229	1.29224	0.404128	0.687714	-2.06855	3.11301	14 months	Collected during pandemic		Environmental	ENS
5	daycare_14myes	-0.37447	1.47926	-0.253148	0.801115	-3.3402	2.59126	14 months	Daycare		Environmental	ENS
5	delivery_placehospital	1.99259	1.74007	1.14512	0.25721	-1.49605	5.48122	14 months	Delivery place		Perinatal	ENS
5	delivery_typevaginal	1.5016	1.63649	0.917572	0.362923	-1.77937	4.78257	14 months	Delivery type		Perinatal	ENS
5	formulafeeding_14myes	0.828055	1.78147	0.464816	0.643932	-2.74358	4.39969	14 months	Formulafeeding		Dietary	ENS
5	furrypet_home_yn_14myes	-1.25729	1.39918	-0.898588	0.372861	-4.06248	1.5479	14 months	Pets		Environmental	ENS
5	hospitalyes	-2.62972	1.31494	-1.99988	0.0505536	-5.26601	0.00656993	14 months	Hospitalisation		Perinatal	ENS
5	mat_AB_use_final_deliveryyes	-0.992654	1.91022	-0.519655	0.605428	-4.82241	2.8371	14 months	Intrapartum antibiotics		Parental	ENS
5	mat_weightgain	0.339834	0.660242	0.514711	0.608855	-0.983871	1.66354	14 months	Maternal weight gain		Parental	ENS
5	older_siblingsyes	1.08715	1.48134	0.733898	0.466185	-1.88275	4.05706	14 months	Older siblings		Environmental	ENS
5	pregn_weeks	0.32465	0.68402	0.47462	0.636972	-1.04673	1.69603	14 months	Gestational age		Perinatal	ENS
5	sexmale	-0.476244	1.21231	-0.392839	0.695985	-2.90678	1.9543	14 months	Sex		Perinatal	ENS
5	smoke_before_pregyes	0.55172	1.74495	0.316182	0.753084	-2.94669	4.05013	14 months	Prenatal smoking		Parental	ENS
5	twins.siblings_in_luckiyes	1.88242	1.79041	1.0514	0.29776	-1.70712	5.47197	14 months	Siblings in cohort		Environmental	ENS
6	(Intercept)	10.5376	2.91693	3.61258	0.000641777	4.69658	16.3787	14 months	NA	***	NA	ENS
6	ageintrosolids	-0.0557499	0.567359	-0.0982621	0.922069	-1.19187	1.08037	14 months	Compelmentary foods age		Dietary	ENS
6	atopy_fatheryes	0.907643	1.21869	0.744768	0.459472	-1.53274	3.34803	14 months	Father's atopy		Parental	ENS
6	atopy_motheryes	-2.92	1.193	-2.44762	0.0174839	-5.30894	-0.531068	14 months	Mother's atopy	*	Parental	ENS
6	covid_270220yes	0.727367	1.23986	0.586654	0.559753	-1.75541	3.21014	14 months	Collected during pandemic		Environmental	ENS
6	delivery_placehospital	2.40103	1.71281	1.40181	0.166394	-1.02881	5.83087	14 months	Delivery place		Perinatal	ENS
6	delivery_typevaginal	1.45636	1.61593	0.90125	0.371248	-1.77949	4.69221	14 months	Delivery type		Perinatal	ENS
6	formulafeeding_14myes	0.0570931	1.59232	0.0358554	0.971523	-3.13146	3.24565	14 months	Formulafeeding		Dietary	ENS
6	furrypet_home_yn_14myes	-1.30874	1.35102	-0.968706	0.336784	-4.01412	1.39663	14 months	Pets		Environmental	ENS
6	hospitalyes	-2.73596	1.29974	-2.10501	0.0397097	-5.33863	-0.133283	14 months	Hospitalisation	*	Perinatal	ENS
6	mat_AB_use_final_deliveryyes	-1.19667	1.78086	-0.671963	0.504322	-4.76278	2.36943	14 months	Intrapartum antibiotics		Parental	ENS
6	mat_weightgain	0.443354	0.650946	0.681091	0.498571	-0.860143	1.74685	14 months	Maternal weight gain		Parental	ENS
6	older_siblingsyes	1.57252	1.40736	1.11735	0.26853	-1.24567	4.39072	14 months	Older siblings		Environmental	ENS
6	pregn_weeks	0.339634	0.679606	0.499751	0.619174	-1.02125	1.70052	14 months	Gestational age		Perinatal	ENS
6	sexmale	-0.254842	1.18904	-0.214325	0.831058	-2.63586	2.12618	14 months	Sex		Perinatal	ENS
6	smoke_before_pregyes	0.414062	1.7291	0.239467	0.811603	-3.04841	3.87653	14 months	Prenatal smoking		Parental	ENS
6	twins.siblings_in_luckiyes	1.72916	1.75084	0.987621	0.327512	-1.77682	5.23515	14 months	Siblings in cohort		Environmental	ENS
7	(Intercept)	10.5795	2.64959	3.99289	0.000186038	5.2758	15.8833	14 months	NA	***	NA	ENS
7	ageintrosolids	-0.0622128	0.533314	-0.116653	0.907538	-1.12976	1.00533	14 months	Compelmentary foods age		Dietary	ENS
7	atopy_fatheryes	0.914325	1.19394	0.765802	0.4469	-1.47561	3.30426	14 months	Father's atopy		Parental	ENS
7	atopy_motheryes	-2.92324	1.17928	-2.47883	0.0161112	-5.28384	-0.562649	14 months	Mother's atopy	*	Parental	ENS
7	covid_270220yes	0.720905	1.21608	0.59281	0.555613	-1.71335	3.15516	14 months	Collected during pandemic		Environmental	ENS
7	delivery_placehospital	2.40571	1.69306	1.42093	0.160693	-0.983316	5.79474	14 months	Delivery place		Perinatal	ENS
7	delivery_typevaginal	1.45473	1.60132	0.908452	0.367399	-1.75067	4.66012	14 months	Delivery type		Perinatal	ENS
7	furrypet_home_yn_14myes	-1.30627	1.33759	-0.976583	0.332831	-3.98375	1.37121	14 months	Pets		Environmental	ENS
7	hospitalyes	-2.72501	1.25245	-2.17575	0.033662	-5.23206	-0.217962	14 months	Hospitalisation	*	Perinatal	ENS
7	mat_AB_use_final_deliveryyes	-1.20192	1.75948	-0.683113	0.497255	-4.7239	2.32006	14 months	Intrapartum antibiotics		Parental	ENS
7	mat_weightgain	0.443844	0.645175	0.687944	0.49423	-0.847613	1.7353	14 months	Maternal weight gain		Parental	ENS
7	older_siblingsyes	1.57476	1.39382	1.12981	0.263206	-1.21528	4.3648	14 months	Older siblings		Environmental	ENS
7	pregn_weeks	0.336754	0.669009	0.503363	0.616615	-1.00241	1.67592	14 months	Gestational age		Perinatal	ENS
7	sexmale	-0.257869	1.17579	-0.219316	0.827174	-2.61146	2.09572	14 months	Sex		Perinatal	ENS
7	smoke_before_pregyes	0.422439	1.69843	0.248722	0.804454	-2.97735	3.82223	14 months	Prenatal smoking		Parental	ENS
7	twins.siblings_in_luckiyes	1.72168	1.72333	0.999042	0.321924	-1.72794	5.17131	14 months	Siblings in cohort		Environmental	ENS
8	(Intercept)	10.5997	2.62177	4.04294	0.000155132	5.35351	15.8458	14 months	NA	***	NA	ENS
8	atopy_fatheryes	0.927673	1.17847	0.787183	0.434326	-1.43044	3.28579	14 months	Father's atopy		Parental	ENS
8	atopy_motheryes	-2.92886	1.16841	-2.5067	0.0149614	-5.26684	-0.590874	14 months	Mother's atopy	*	Parental	ENS
8	covid_270220yes	0.747415	1.18463	0.630928	0.530524	-1.62302	3.11785	14 months	Collected during pandemic		Environmental	ENS
8	delivery_placehospital	2.3815	1.66618	1.42931	0.158188	-0.952526	5.71552	14 months	Delivery place		Perinatal	ENS
8	delivery_typevaginal	1.45276	1.58779	0.914956	0.363939	-1.72441	4.62993	14 months	Delivery type		Perinatal	ENS
8	furrypet_home_yn_14myes	-1.29725	1.32415	-0.979687	0.331241	-3.94686	1.35236	14 months	Pets		Environmental	ENS
8	hospitalyes	-2.73716	1.23764	-2.2116	0.0308803	-5.21366	-0.260655	14 months	Hospitalisation	*	Perinatal	ENS
8	mat_AB_use_final_deliveryyes	-1.22935	1.72905	-0.710998	0.479887	-4.68918	2.23048	14 months	Intrapartum antibiotics		Parental	ENS
8	mat_weightgain	0.434112	0.634387	0.684301	0.496464	-0.835294	1.70352	14 months	Maternal weight gain		Parental	ENS
8	older_siblingsyes	1.53577	1.3418	1.14456	0.257014	-1.14917	4.22071	14 months	Older siblings		Environmental	ENS
8	pregn_weeks	0.333153	0.662686	0.502731	0.617025	-0.992878	1.65918	14 months	Gestational age		Perinatal	ENS
8	sexmale	-0.274697	1.15711	-0.2374	0.813169	-2.59007	2.04067	14 months	Sex		Perinatal	ENS
8	smoke_before_pregyes	0.463755	1.64715	0.28155	0.779274	-2.83219	3.7597	14 months	Prenatal smoking		Parental	ENS
8	twins.siblings_in_luckiyes	1.7302	1.70733	1.01339	0.31501	-1.68616	5.14657	14 months	Siblings in cohort		Environmental	ENS
9	(Intercept)	10.4484	2.52309	4.14112	0.000109757	5.40147	15.4953	14 months	NA	***	NA	ENS
9	atopy_fatheryes	0.960742	1.16097	0.827533	0.411214	-1.36155	3.28303	14 months	Father's atopy		Parental	ENS
9	atopy_motheryes	-2.91755	1.15822	-2.51899	0.014452	-5.23434	-0.60076	14 months	Mother's atopy	*	Parental	ENS
9	covid_270220yes	0.750164	1.17522	0.638317	0.525696	-1.60063	3.10096	14 months	Collected during pandemic		Environmental	ENS
9	delivery_placehospital	2.3117	1.62709	1.42076	0.160563	-0.942962	5.56636	14 months	Delivery place		Perinatal	ENS
9	delivery_typevaginal	1.45021	1.57522	0.920639	0.360926	-1.7007	4.60112	14 months	Delivery type		Perinatal	ENS
9	furrypet_home_yn_14myes	-1.28662	1.31294	-0.979955	0.331043	-3.91289	1.33965	14 months	Pets		Environmental	ENS
9	hospitalyes	-2.72242	1.22632	-2.21999	0.0302091	-5.17542	-0.269415	14 months	Hospitalisation	*	Perinatal	ENS
9	mat_AB_use_final_deliveryyes	-1.11426	1.6466	-0.676707	0.501192	-4.40795	2.17942	14 months	Intrapartum antibiotics		Parental	ENS
9	mat_weightgain	0.447396	0.626926	0.713636	0.478219	-0.806642	1.70143	14 months	Maternal weight gain		Parental	ENS
9	older_siblingsyes	1.5571	1.32822	1.17232	0.245702	-1.09974	4.21394	14 months	Older siblings		Environmental	ENS
9	pregn_weeks	0.337589	0.657193	0.513683	0.60936	-0.976992	1.65217	14 months	Gestational age		Perinatal	ENS
9	smoke_before_pregyes	0.487204	1.63121	0.298677	0.766218	-2.77569	3.7501	14 months	Prenatal smoking		Parental	ENS
9	twins.siblings_in_luckiyes	1.76127	1.68887	1.04287	0.301194	-1.61698	5.13951	14 months	Siblings in cohort		Environmental	ENS
10	(Intercept)	10.5987	2.45389	4.31912	5.86219e-05	5.6918	15.5055	14 months	NA	***	NA	ENS
10	atopy_fatheryes	0.957973	1.15223	0.831405	0.408988	-1.34606	3.26201	14 months	Father's atopy		Parental	ENS
10	atopy_motheryes	-2.88962	1.14579	-2.52194	0.0142975	-5.18077	-0.598471	14 months	Mother's atopy	*	Parental	ENS
10	covid_270220yes	0.719961	1.16209	0.619541	0.537867	-1.60378	3.0437	14 months	Collected during pandemic		Environmental	ENS
10	delivery_placehospital	2.34792	1.6104	1.45797	0.149978	-0.872279	5.56812	14 months	Delivery place		Perinatal	ENS
10	delivery_typevaginal	1.3209	1.50321	0.878721	0.383001	-1.68495	4.32676	14 months	Delivery type		Perinatal	ENS
10	furrypet_home_yn_14myes	-1.28519	1.30309	-0.986264	0.3279	-3.89089	1.3205	14 months	Pets		Environmental	ENS
10	hospitalyes	-2.71879	1.21707	-2.23388	0.0291675	-5.15247	-0.285108	14 months	Hospitalisation	*	Perinatal	ENS
10	mat_AB_use_final_deliveryyes	-1.08891	1.63209	-0.667191	0.507166	-4.35247	2.17465	14 months	Intrapartum antibiotics		Parental	ENS
10	mat_weightgain	0.448304	0.62222	0.72049	0.473975	-0.795903	1.69251	14 months	Maternal weight gain		Parental	ENS
10	older_siblingsyes	1.53029	1.31525	1.1635	0.249159	-1.09972	4.16031	14 months	Older siblings		Environmental	ENS
10	pregn_weeks	0.370451	0.643062	0.576073	0.566685	-0.915431	1.65633	14 months	Gestational age		Perinatal	ENS
10	twins.siblings_in_luckiyes	1.71696	1.66974	1.02828	0.307878	-1.62188	5.0558	14 months	Siblings in cohort		Environmental	ENS
11	(Intercept)	10.7899	2.41819	4.46198	3.49029e-05	5.95603	15.6238	14 months	NA	***	NA	ENS
11	atopy_fatheryes	0.980098	1.14537	0.855703	0.395457	-1.30947	3.26967	14 months	Father's atopy		Parental	ENS
11	atopy_motheryes	-3.04789	1.10635	-2.7549	0.0076966	-5.25946	-0.836324	14 months	Mother's atopy	**	Parental	ENS
11	covid_270220yes	0.687645	1.15446	0.595641	0.553583	-1.62009	2.99538	14 months	Collected during pandemic		Environmental	ENS
11	delivery_placehospital	2.39439	1.59969	1.49678	0.139524	-0.80335	5.59213	14 months	Delivery place		Perinatal	ENS
11	delivery_typevaginal	1.42473	1.4843	0.959862	0.340853	-1.54235	4.39181	14 months	Delivery type		Perinatal	ENS
11	furrypet_home_yn_14myes	-1.36876	1.288	-1.06271	0.292038	-3.94343	1.20591	14 months	Pets		Environmental	ENS
11	hospitalyes	-2.94904	1.14336	-2.57927	0.0122866	-5.23458	-0.663491	14 months	Hospitalisation	*	Perinatal	ENS
11	mat_AB_use_final_deliveryyes	-0.990998	1.61444	-0.613833	0.541571	-4.21822	2.23622	14 months	Intrapartum antibiotics		Parental	ENS
11	mat_weightgain	0.561775	0.587031	0.956977	0.342296	-0.611683	1.73523	14 months	Maternal weight gain		Parental	ENS
11	older_siblingsyes	1.4102	1.29161	1.09181	0.27914	-1.1717	3.99209	14 months	Older siblings		Environmental	ENS
11	twins.siblings_in_luckiyes	1.49427	1.6156	0.924904	0.358602	-1.73526	4.72381	14 months	Siblings in cohort		Environmental	ENS
12	(Intercept)	11.1336	2.33628	4.76552	1.15008e-05	6.46493	15.8023	14 months	NA	***	NA	ENS
12	atopy_fatheryes	0.938739	1.1374	0.82534	0.412293	-1.33417	3.21165	14 months	Father's atopy		Parental	ENS
12	atopy_motheryes	-3.0021	1.09801	-2.73412	0.00811093	-5.1963	-0.807894	14 months	Mother's atopy	**	Parental	ENS
12	delivery_placehospital	2.32665	1.58745	1.46565	0.147717	-0.845621	5.49892	14 months	Delivery place		Perinatal	ENS
12	delivery_typevaginal	1.47534	1.47426	1.00073	0.320785	-1.47074	4.42141	14 months	Delivery type		Perinatal	ENS
12	furrypet_home_yn_14myes	-1.54372	1.24762	-1.23733	0.220556	-4.03689	0.94945	14 months	Pets		Environmental	ENS
12	hospitalyes	-2.90098	1.13465	-2.55671	0.0129887	-5.16841	-0.633555	14 months	Hospitalisation	*	Perinatal	ENS
12	mat_AB_use_final_deliveryyes	-0.951005	1.60476	-0.592614	0.555561	-4.15787	2.25586	14 months	Intrapartum antibiotics		Parental	ENS
12	mat_weightgain	0.585318	0.582692	1.00451	0.318977	-0.579099	1.74974	14 months	Maternal weight gain		Parental	ENS
12	older_siblingsyes	1.20566	1.23873	0.9733	0.334127	-1.26975	3.68107	14 months	Older siblings		Environmental	ENS
12	twins.siblings_in_luckiyes	1.47025	1.6068	0.915015	0.363673	-1.74069	4.68119	14 months	Siblings in cohort		Environmental	ENS
13	(Intercept)	10.981	2.31025	4.75317	1.17561e-05	6.36576	15.5963	14 months	NA	***	NA	ENS
13	atopy_fatheryes	0.879535	1.12724	0.780253	0.438118	-1.37239	3.13146	14 months	Father's atopy		Parental	ENS
13	atopy_motheryes	-2.99823	1.09241	-2.74459	0.00785355	-5.18058	-0.815885	14 months	Mother's atopy	**	Parental	ENS
13	delivery_placehospital	2.25367	1.57463	1.43124	0.157226	-0.892006	5.39935	14 months	Delivery place		Perinatal	ENS
13	delivery_typevaginal	1.63867	1.44091	1.13725	0.259674	-1.23988	4.51722	14 months	Delivery type		Perinatal	ENS
13	furrypet_home_yn_14myes	-1.60431	1.2371	-1.29683	0.199346	-4.07571	0.867085	14 months	Pets		Environmental	ENS
13	hospitalyes	-2.97237	1.12251	-2.64796	0.0101851	-5.21484	-0.729895	14 months	Hospitalisation	*	Perinatal	ENS
13	mat_weightgain	0.580688	0.579679	1.00174	0.320241	-0.577354	1.73873	14 months	Maternal weight gain		Parental	ENS
13	older_siblingsyes	1.20994	1.23242	0.981757	0.329916	-1.2521	3.67198	14 months	Older siblings		Environmental	ENS
13	twins.siblings_in_luckiyes	1.64381	1.57186	1.04577	0.299599	-1.49634	4.78395	14 months	Siblings in cohort		Environmental	ENS
14	(Intercept)	11.6742	2.12618	5.49067	7.11443e-07	7.42789	15.9205	14 months	NA	***	NA	ENS
14	atopy_motheryes	-2.98041	1.08888	-2.73713	0.00798502	-5.15506	-0.805763	14 months	Mother's atopy	**	Parental	ENS
14	delivery_placehospital	2.14387	1.5636	1.37111	0.175056	-0.978855	5.26659	14 months	Delivery place		Perinatal	ENS
14	delivery_typevaginal	1.62643	1.43648	1.13223	0.261696	-1.24242	4.49529	14 months	Delivery type		Perinatal	ENS
14	furrypet_home_yn_14myes	-1.85	1.19275	-1.55103	0.125749	-4.23209	0.532093	14 months	Pets		Environmental	ENS
14	hospitalyes	-3.11071	1.10508	-2.81493	0.00644999	-5.3177	-0.90372	14 months	Hospitalisation	**	Perinatal	ENS
14	mat_weightgain	0.600278	0.57739	1.03964	0.302359	-0.552849	1.7534	14 months	Maternal weight gain		Parental	ENS
14	older_siblingsyes	0.943898	1.18074	0.799409	0.426965	-1.41421	3.30201	14 months	Older siblings		Environmental	ENS
14	twins.siblings_in_luckiyes	1.95029	1.5174	1.28528	0.203255	-1.08018	4.98075	14 months	Siblings in cohort		Environmental	ENS
15	(Intercept)	12.1086	2.04992	5.90689	1.34124e-07	8.01585	16.2014	14 months	NA	***	NA	ENS
15	atopy_motheryes	-2.95239	1.08534	-2.72024	0.00833024	-5.11933	-0.785438	14 months	Mother's atopy	**	Parental	ENS
15	delivery_placehospital	1.99793	1.54865	1.29011	0.201515	-1.09405	5.08992	14 months	Delivery place		Perinatal	ENS
15	delivery_typevaginal	1.70241	1.42941	1.19099	0.237924	-1.1515	4.55632	14 months	Delivery type		Perinatal	ENS
15	furrypet_home_yn_14myes	-2.08612	1.15244	-1.81018	0.0748202	-4.38704	0.214795	14 months	Pets		Environmental	ENS
15	hospitalyes	-3.19772	1.09669	-2.91578	0.00484247	-5.38733	-1.0081	14 months	Hospitalisation	**	Perinatal	ENS
15	mat_weightgain	0.689489	0.564951	1.22044	0.226641	-0.438473	1.81745	14 months	Maternal weight gain		Parental	ENS
15	twins.siblings_in_luckiyes	2.10121	1.50149	1.39941	0.166371	-0.896615	5.09903	14 months	Siblings in cohort		Environmental	ENS
16	(Intercept)	13.7687	1.5078	9.13163	2.22544e-13	10.7591	16.7783	14 months	NA	***	NA	ENS
16	atopy_motheryes	-2.74399	1.07448	-2.55378	0.0129371	-4.88866	-0.599318	14 months	Mother's atopy	*	Parental	ENS
16	delivery_placehospital	1.64187	1.52426	1.07716	0.285273	-1.40057	4.6843	14 months	Delivery place		Perinatal	ENS
16	furrypet_home_yn_14myes	-2.20315	1.15182	-1.91275	0.0600555	-4.50219	0.0958982	14 months	Pets		Environmental	ENS
16	hospitalyes	-3.29015	1.09735	-2.99825	0.00380747	-5.48047	-1.09982	14 months	Hospitalisation	**	Perinatal	ENS
16	mat_weightgain	0.545949	0.553667	0.98606	0.327651	-0.559175	1.65107	14 months	Maternal weight gain		Parental	ENS
16	twins.siblings_in_luckiyes	2.10344	1.50617	1.39655	0.16716	-0.902892	5.10976	14 months	Siblings in cohort		Environmental	ENS
17	(Intercept)	13.7392	1.5072	9.11573	2.08749e-13	10.7317	16.7468	14 months	NA	***	NA	ENS
17	atopy_motheryes	-2.62935	1.06795	-2.46204	0.016355	-4.76042	-0.49828	14 months	Mother's atopy	*	Parental	ENS
17	delivery_placehospital	1.48523	1.51565	0.979929	0.330595	-1.5392	4.50966	14 months	Delivery place		Perinatal	ENS
17	furrypet_home_yn_14myes	-2.11535	1.14814	-1.84241	0.069775	-4.40643	0.175732	14 months	Pets		Environmental	ENS
17	hospitalyes	-3.10665	1.08124	-2.87322	0.00541617	-5.26423	-0.949065	14 months	Hospitalisation	**	Perinatal	ENS
17	twins.siblings_in_luckiyes	2.04726	1.50479	1.3605	0.178164	-0.955489	5.05002	14 months	Siblings in cohort		Environmental	ENS
18	(Intercept)	14.8449	0.999046	14.859	3.43919e-23	12.8518	16.8379	14 months	NA	***	NA	ENS
18	atopy_motheryes	-2.53925	1.06368	-2.38722	0.0197209	-4.66124	-0.41726	14 months	Mother's atopy	*	Parental	ENS
18	furrypet_home_yn_14myes	-2.0287	1.1444	-1.77272	0.0806894	-4.31172	0.254318	14 months	Pets		Environmental	ENS
18	hospitalyes	-2.83896	1.04586	-2.71447	0.0083785	-4.9254	-0.75252	14 months	Hospitalisation	**	Perinatal	ENS
18	twins.siblings_in_luckiyes	1.79507	1.48219	1.21109	0.229991	-1.16181	4.75195	14 months	Siblings in cohort		Environmental	ENS
19	(Intercept)	15.1568	0.968485	15.65	1.48591e-24	13.2252	17.0884	14 months	NA	***	NA	ENS
19	atopy_motheryes	-2.76559	1.05062	-2.63234	0.0104258	-4.86099	-0.670191	14 months	Mother's atopy	*	Parental	ENS
19	furrypet_home_yn_14myes	-2.02423	1.1482	-1.76295	0.0822729	-4.31425	0.26579	14 months	Pets		Environmental	ENS
19	hospitalyes	-2.64802	1.03735	-2.55267	0.0128732	-4.71696	-0.579089	14 months	Hospitalisation	*	Perinatal	ENS
1	(Intercept)	32.0739	8.26483	3.88077	0.000248741	15.563	48.5848	1 week	NA	***	NA	Observed richness
1	atopy_fatheryes	1.975	2.45569	0.804254	0.424228	-2.9308	6.88079	1 week	Father's atopy		Parental	Observed richness
1	atopy_motheryes	0.716126	2.57226	0.278404	0.7816	-4.42255	5.8548	1 week	Mother's atopy		Parental	Observed richness
1	birthweight	-0.791747	1.61808	-0.489313	0.626293	-4.02423	2.44074	1 week	Birth weight		Perinatal	Observed richness
1	breastfeeding_1_2wyes	-4.5769	4.51167	-1.01446	0.314183	-13.59	4.43619	1 week	Breastfeeding		Dietary	Observed richness
1	covid_270220yes	-1.36324	2.76954	-0.492227	0.624243	-6.89603	4.16955	1 week	Collected during pandemic		Environmental	Observed richness
1	delivery_placehospital	-2.0828	3.70767	-0.561753	0.576247	-9.48973	5.32413	1 week	Delivery place		Perinatal	Observed richness
1	delivery_typevaginal	-3.74544	4.15449	-0.90154	0.370682	-12.045	4.55411	1 week	Delivery type		Perinatal	Observed richness
1	formulafeeding_1_2wyes	4.2211	2.97837	1.41725	0.16126	-1.72889	10.1711	1 week	Formulafeeding		Dietary	Observed richness
1	furrypet_home_yn_6myes	-2.54963	2.6294	-0.969661	0.335866	-7.80247	2.70321	1 week	Pets		Environmental	Observed richness
1	hospitalyes	2.21022	2.61613	0.844844	0.401345	-3.0161	7.43653	1 week	Hospitalisation		Perinatal	Observed richness
1	mat_AB_use_final_deliveryyes	-6.45662	4.12206	-1.56636	0.122196	-14.6914	1.77813	1 week	Intrapartum antibiotics		Parental	Observed richness
1	mat_AB_use_final_pregyes	0.884889	3.90006	0.226891	0.821232	-6.90637	8.67615	1 week	Antepartum antibiotics		Parental	Observed richness
1	mat_weightgain	0.528697	1.1819	0.447328	0.656148	-1.83242	2.88981	1 week	Maternal weight gain		Parental	Observed richness
1	older_siblingsyes	2.7308	2.67455	1.02103	0.311084	-2.61223	8.07382	1 week	Older siblings		Environmental	Observed richness
1	pregn_weeks	3.02786	1.63403	1.853	0.0684936	-0.236492	6.29222	1 week	Gestational age		Perinatal	Observed richness
1	sexmale	-0.206899	2.46937	-0.0837863	0.933488	-5.14003	4.72623	1 week	Sex		Perinatal	Observed richness
1	smoke_before_pregyes	-2.52403	3.14847	-0.801669	0.425711	-8.81383	3.76576	1 week	Prenatal smoking		Parental	Observed richness
1	twins.siblings_in_luckiyes	1.08066	3.59097	0.300937	0.764438	-6.09314	8.25445	1 week	Siblings in cohort		Environmental	Observed richness
2	(Intercept)	31.8999	7.93836	4.01845	0.000154698	16.0459	47.7539	1 week	NA	***	NA	Observed richness
2	atopy_fatheryes	1.97658	2.43678	0.811144	0.420243	-2.89001	6.84318	1 week	Father's atopy		Parental	Observed richness
2	atopy_motheryes	0.690688	2.53469	0.272494	0.786106	-4.37144	5.75282	1 week	Mother's atopy		Parental	Observed richness
2	birthweight	-0.810903	1.58956	-0.510142	0.61168	-3.98548	2.36367	1 week	Birth weight		Perinatal	Observed richness
2	breastfeeding_1_2wyes	-4.50659	4.39893	-1.02447	0.309409	-13.2919	4.27868	1 week	Breastfeeding		Dietary	Observed richness
2	covid_270220yes	-1.36879	2.74752	-0.49819	0.620031	-6.85596	4.11838	1 week	Collected during pandemic		Environmental	Observed richness
2	delivery_placehospital	-2.11448	3.66006	-0.577717	0.565451	-9.42412	5.19517	1 week	Delivery place		Perinatal	Observed richness
2	delivery_typevaginal	-3.73573	4.12103	-0.906504	0.368017	-11.966	4.49453	1 week	Delivery type		Perinatal	Observed richness
2	formulafeeding_1_2wyes	4.26951	2.89939	1.47255	0.145698	-1.52098	10.06	1 week	Formulafeeding		Dietary	Observed richness
2	furrypet_home_yn_6myes	-2.54395	2.60837	-0.9753	0.333027	-7.75323	2.66533	1 week	Pets		Environmental	Observed richness
2	hospitalyes	2.18801	2.58271	0.847176	0.400005	-2.97001	7.34603	1 week	Hospitalisation		Perinatal	Observed richness
2	mat_AB_use_final_deliveryyes	-6.44021	4.08583	-1.57623	0.119828	-14.6002	1.71976	1 week	Intrapartum antibiotics		Parental	Observed richness
2	mat_AB_use_final_pregyes	0.893943	3.86867	0.231073	0.817984	-6.83232	8.62021	1 week	Antepartum antibiotics		Parental	Observed richness
2	mat_weightgain	0.544855	1.15712	0.470871	0.639309	-1.76607	2.85578	1 week	Maternal weight gain		Parental	Observed richness
2	older_siblingsyes	2.74148	2.65103	1.03412	0.304913	-2.55299	8.03594	1 week	Older siblings		Environmental	Observed richness
2	pregn_weeks	3.03981	1.61532	1.88186	0.0643335	-0.186209	6.26582	1 week	Gestational age		Perinatal	Observed richness
2	smoke_before_pregyes	-2.51468	3.12237	-0.805376	0.423539	-8.75048	3.72112	1 week	Prenatal smoking		Parental	Observed richness
2	twins.siblings_in_luckiyes	1.06977	3.5611	0.300403	0.764828	-6.04225	8.18178	1 week	Siblings in cohort		Environmental	Observed richness
3	(Intercept)	31.6957	7.83225	4.04682	0.000138647	16.0581	47.3333	1 week	NA	***	NA	Observed richness
3	atopy_fatheryes	2.04111	2.40331	0.84929	0.39879	-2.75726	6.83947	1 week	Father's atopy		Parental	Observed richness
3	atopy_motheryes	0.695072	2.51638	0.276219	0.783243	-4.32904	5.71919	1 week	Mother's atopy		Parental	Observed richness
3	birthweight	-0.820652	1.57757	-0.520201	0.604664	-3.97037	2.32906	1 week	Birth weight		Perinatal	Observed richness
3	breastfeeding_1_2wyes	-4.45608	4.36188	-1.0216	0.310701	-13.1649	4.25268	1 week	Breastfeeding		Dietary	Observed richness
3	covid_270220yes	-1.13772	2.54066	-0.447804	0.655761	-6.2103	3.93487	1 week	Collected during pandemic		Environmental	Observed richness
3	delivery_placehospital	-1.98497	3.59086	-0.552784	0.582279	-9.15437	5.18442	1 week	Delivery place		Perinatal	Observed richness
3	delivery_typevaginal	-3.72546	4.09113	-0.910618	0.365811	-11.8937	4.44275	1 week	Delivery type		Perinatal	Observed richness
3	formulafeeding_1_2wyes	4.29895	2.87574	1.4949	0.139707	-1.44266	10.0406	1 week	Formulafeeding		Dietary	Observed richness
3	furrypet_home_yn_6myes	-2.50036	2.58282	-0.968073	0.336542	-7.65712	2.65641	1 week	Pets		Environmental	Observed richness
3	hospitalyes	2.20563	2.563	0.860564	0.392593	-2.91157	7.32283	1 week	Hospitalisation		Perinatal	Observed richness
3	mat_AB_use_final_deliveryyes	-6.30731	4.01603	-1.57053	0.121074	-14.3256	1.71096	1 week	Intrapartum antibiotics		Parental	Observed richness
3	mat_weightgain	0.533257	1.14771	0.464627	0.643728	-1.75822	2.82474	1 week	Maternal weight gain		Parental	Observed richness
3	older_siblingsyes	2.81396	2.61346	1.07672	0.285526	-2.40398	8.0319	1 week	Older siblings		Environmental	Observed richness
3	pregn_weeks	3.0243	1.60231	1.88746	0.0634964	-0.174816	6.22341	1 week	Gestational age		Perinatal	Observed richness
3	smoke_before_pregyes	-2.52332	3.09967	-0.814062	0.418537	-8.71202	3.66537	1 week	Prenatal smoking		Parental	Observed richness
3	twins.siblings_in_luckiyes	0.876848	3.43694	0.255125	0.79942	-5.98522	7.73891	1 week	Siblings in cohort		Environmental	Observed richness
4	(Intercept)	31.8813	7.74379	4.11702	0.000107508	16.4246	47.338	1 week	NA	***	NA	Observed richness
4	atopy_fatheryes	2.14957	2.34884	0.915163	0.363388	-2.53874	6.83789	1 week	Father's atopy		Parental	Observed richness
4	atopy_motheryes	0.572122	2.45251	0.23328	0.816255	-4.32311	5.46735	1 week	Mother's atopy		Parental	Observed richness
4	birthweight	-0.857885	1.5598	-0.549995	0.584152	-3.97127	2.2555	1 week	Birth weight		Perinatal	Observed richness
4	breastfeeding_1_2wyes	-4.44332	4.33105	-1.02592	0.308618	-13.0881	4.20149	1 week	Breastfeeding		Dietary	Observed richness
4	covid_270220yes	-1.13415	2.52283	-0.449555	0.654482	-6.16974	3.90144	1 week	Collected during pandemic		Environmental	Observed richness
4	delivery_placehospital	-2.00299	3.56503	-0.561842	0.576099	-9.11882	5.11285	1 week	Delivery place		Perinatal	Observed richness
4	delivery_typevaginal	-3.84152	4.03729	-0.951509	0.344766	-11.9	4.21695	1 week	Delivery type		Perinatal	Observed richness
4	formulafeeding_1_2wyes	4.38049	2.83792	1.54356	0.127406	-1.28401	10.045	1 week	Formulafeeding		Dietary	Observed richness
4	furrypet_home_yn_6myes	-2.53588	2.56101	-0.990188	0.325645	-7.64767	2.57591	1 week	Pets		Environmental	Observed richness
4	hospitalyes	2.33721	2.493	0.93751	0.351864	-2.63883	7.31325	1 week	Hospitalisation		Perinatal	Observed richness
4	mat_AB_use_final_deliveryyes	-6.1858	3.95977	-1.56216	0.122962	-14.0895	1.71794	1 week	Intrapartum antibiotics		Parental	Observed richness
4	mat_weightgain	0.502783	1.13349	0.443572	0.658781	-1.75967	2.76523	1 week	Maternal weight gain		Parental	Observed richness
4	older_siblingsyes	2.86612	2.58721	1.10781	0.271907	-2.29797	8.03021	1 week	Older siblings		Environmental	Observed richness
4	pregn_weeks	2.95089	1.56523	1.88528	0.0637292	-0.173316	6.07509	1 week	Gestational age		Perinatal	Observed richness
4	smoke_before_pregyes	-2.60477	3.0616	-0.850787	0.397918	-8.71575	3.50621	1 week	Prenatal smoking		Parental	Observed richness
5	(Intercept)	31.8709	7.68963	4.14465	9.63947e-05	16.5264	47.2153	1 week	NA	***	NA	Observed richness
5	atopy_fatheryes	2.12971	2.33092	0.913677	0.364115	-2.52157	6.781	1 week	Father's atopy		Parental	Observed richness
5	birthweight	-0.851117	1.54865	-0.549585	0.584404	-3.94141	2.23917	1 week	Birth weight		Perinatal	Observed richness
5	breastfeeding_1_2wyes	-4.41255	4.29884	-1.02645	0.308316	-12.9907	4.16565	1 week	Breastfeeding		Dietary	Observed richness
5	covid_270220yes	-1.0783	2.49392	-0.432371	0.66684	-6.05484	3.89824	1 week	Collected during pandemic		Environmental	Observed richness
5	delivery_placehospital	-1.90303	3.5145	-0.54148	0.589946	-8.9161	5.11004	1 week	Delivery place		Perinatal	Observed richness
5	delivery_typevaginal	-3.55453	3.81846	-0.930881	0.355208	-11.1741	4.06509	1 week	Delivery type		Perinatal	Observed richness
5	formulafeeding_1_2wyes	4.36872	2.81767	1.55047	0.12567	-1.25385	9.9913	1 week	Formulafeeding		Dietary	Observed richness
5	furrypet_home_yn_6myes	-2.64453	2.50073	-1.0575	0.294024	-7.63465	2.3456	1 week	Pets		Environmental	Observed richness
5	hospitalyes	2.38685	2.46657	0.967682	0.336633	-2.53511	7.30881	1 week	Hospitalisation		Perinatal	Observed richness
5	mat_AB_use_final_deliveryyes	-6.09253	3.91205	-1.55738	0.124024	-13.8989	1.71384	1 week	Intrapartum antibiotics		Parental	Observed richness
5	mat_weightgain	0.565295	1.09367	0.516877	0.606919	-1.61709	2.74768	1 week	Maternal weight gain		Parental	Observed richness
5	older_siblingsyes	2.78317	2.54478	1.09368	0.277954	-2.29485	7.8612	1 week	Older siblings		Environmental	Observed richness
5	pregn_weeks	2.92161	1.5493	1.88576	0.0635992	-0.16997	6.0132	1 week	Gestational age		Perinatal	Observed richness
5	smoke_before_pregyes	-2.49552	3.00446	-0.830604	0.409104	-8.49082	3.49979	1 week	Prenatal smoking		Parental	Observed richness
6	(Intercept)	31.6999	7.63408	4.15242	9.2599e-05	16.4703	46.9295	1 week	NA	***	NA	Observed richness
6	atopy_fatheryes	2.16904	2.31538	0.936793	0.352132	-2.45003	6.7881	1 week	Father's atopy		Parental	Observed richness
6	birthweight	-0.926117	1.52981	-0.605378	0.546914	-3.97801	2.12578	1 week	Birth weight		Perinatal	Observed richness
6	breastfeeding_1_2wyes	-4.46127	4.27197	-1.04431	0.299986	-12.9836	4.06107	1 week	Breastfeeding		Dietary	Observed richness
6	delivery_placehospital	-1.86952	3.49288	-0.535238	0.594206	-8.83763	5.09858	1 week	Delivery place		Perinatal	Observed richness
6	delivery_typevaginal	-3.68506	3.78401	-0.973849	0.333533	-11.234	3.86384	1 week	Delivery type		Perinatal	Observed richness
6	formulafeeding_1_2wyes	4.36108	2.80097	1.55699	0.124048	-1.22669	9.94885	1 week	Formulafeeding		Dietary	Observed richness
6	furrypet_home_yn_6myes	-2.75858	2.47208	-1.11589	0.26834	-7.69025	2.1731	1 week	Pets		Environmental	Observed richness
6	hospitalyes	2.30012	2.44387	0.94118	0.349896	-2.57526	7.17551	1 week	Hospitalisation		Perinatal	Observed richness
6	mat_AB_use_final_deliveryyes	-6.0253	3.88586	-1.55057	0.125579	-13.7774	1.72678	1 week	Intrapartum antibiotics		Parental	Observed richness
6	mat_weightgain	0.541728	1.08586	0.498893	0.619441	-1.6245	2.70796	1 week	Maternal weight gain		Parental	Observed richness
6	older_siblingsyes	2.85109	2.52492	1.12918	0.262732	-2.18598	7.88816	1 week	Older siblings		Environmental	Observed richness
6	pregn_weeks	2.9878	1.53261	1.94949	0.055303	-0.069673	6.04527	1 week	Gestational age		Perinatal	Observed richness
6	smoke_before_pregyes	-2.37796	2.97445	-0.799461	0.426767	-8.31182	3.55591	1 week	Prenatal smoking		Parental	Observed richness
7	(Intercept)	32.0907	7.55294	4.24877	6.51012e-05	17.0268	47.1545	1 week	NA	***	NA	Observed richness
7	atopy_fatheryes	2.0526	2.2912	0.895862	0.373397	-2.51705	6.62225	1 week	Father's atopy		Parental	Observed richness
7	birthweight	-0.818561	1.5064	-0.543389	0.588588	-3.82298	2.18586	1 week	Birth weight		Perinatal	Observed richness
7	breastfeeding_1_2wyes	-4.58861	4.24139	-1.08186	0.283026	-13.0478	3.87058	1 week	Breastfeeding		Dietary	Observed richness
7	delivery_placehospital	-1.93501	3.47164	-0.557376	0.579049	-8.85897	4.98896	1 week	Delivery place		Perinatal	Observed richness
7	delivery_typevaginal	-4.04028	3.69643	-1.09302	0.278132	-11.4126	3.33202	1 week	Delivery type		Perinatal	Observed richness
7	formulafeeding_1_2wyes	4.07749	2.72792	1.49472	0.139482	-1.36318	9.51816	1 week	Formulafeeding		Dietary	Observed richness
7	furrypet_home_yn_6myes	-2.54029	2.41997	-1.04972	0.297457	-7.36676	2.28618	1 week	Pets		Environmental	Observed richness
7	hospitalyes	2.5149	2.39271	1.05107	0.296841	-2.2572	7.28701	1 week	Hospitalisation		Perinatal	Observed richness
7	mat_AB_use_final_deliveryyes	-6.11907	3.86043	-1.58507	0.117457	-13.8185	1.58031	1 week	Intrapartum antibiotics		Parental	Observed richness
7	older_siblingsyes	3.05328	2.47877	1.23177	0.222157	-1.89048	7.99703	1 week	Older siblings		Environmental	Observed richness
7	pregn_weeks	3.0668	1.51621	2.02268	0.0469281	0.0428179	6.09078	1 week	Gestational age	*	Perinatal	Observed richness
7	smoke_before_pregyes	-2.34703	2.95781	-0.793504	0.430166	-8.24619	3.55213	1 week	Prenatal smoking		Parental	Observed richness
8	(Intercept)	31.3057	7.37662	4.24391	6.53485e-05	16.5971	46.0142	1 week	NA	***	NA	Observed richness
8	atopy_fatheryes	2.00235	2.27794	0.879017	0.382357	-2.53974	6.54444	1 week	Father's atopy		Parental	Observed richness
8	breastfeeding_1_2wyes	-4.34827	4.19728	-1.03597	0.303731	-12.7174	4.02088	1 week	Breastfeeding		Dietary	Observed richness
8	delivery_placehospital	-2.19802	3.42063	-0.642578	0.522568	-9.01855	4.62252	1 week	Delivery place		Perinatal	Observed richness
8	delivery_typevaginal	-3.33417	3.44328	-0.968312	0.336175	-10.1999	3.53153	1 week	Delivery type		Perinatal	Observed richness
8	formulafeeding_1_2wyes	4.22582	2.70073	1.5647	0.122101	-1.15928	9.61092	1 week	Formulafeeding		Dietary	Observed richness
8	furrypet_home_yn_6myes	-2.32341	2.37495	-0.978298	0.331248	-7.05893	2.41211	1 week	Pets		Environmental	Observed richness
8	hospitalyes	2.63003	2.37145	1.10904	0.271156	-2.09851	7.35857	1 week	Hospitalisation		Perinatal	Observed richness
8	mat_AB_use_final_deliveryyes	-6.40485	3.80541	-1.68309	0.0967504	-13.9926	1.18293	1 week	Intrapartum antibiotics		Parental	Observed richness
8	older_siblingsyes	3.02423	2.46587	1.22644	0.224086	-1.89257	7.94102	1 week	Older siblings		Environmental	Observed richness
8	pregn_weeks	2.52784	1.14108	2.2153	0.0299479	0.252589	4.80309	1 week	Gestational age	*	Perinatal	Observed richness
8	smoke_before_pregyes	-2.27033	2.93974	-0.772289	0.442506	-8.132	3.59134	1 week	Prenatal smoking		Parental	Observed richness
9	(Intercept)	28.8404	6.27469	4.59631	1.79125e-05	16.332	41.3488	1 week	NA	***	NA	Observed richness
9	atopy_fatheryes	2.3611	2.19944	1.0735	0.286633	-2.02341	6.74561	1 week	Father's atopy		Parental	Observed richness
9	breastfeeding_1_2wyes	-4.06266	4.15663	-0.977393	0.331647	-12.3488	4.22343	1 week	Breastfeeding		Dietary	Observed richness
9	delivery_typevaginal	-3.24857	3.42664	-0.948033	0.346284	-10.0795	3.58232	1 week	Delivery type		Perinatal	Observed richness
9	formulafeeding_1_2wyes	4.0409	2.67438	1.51097	0.135174	-1.29038	9.37219	1 week	Formulafeeding		Dietary	Observed richness
9	furrypet_home_yn_6myes	-2.36911	2.36419	-1.00208	0.31966	-7.08203	2.34381	1 week	Pets		Environmental	Observed richness
9	hospitalyes	2.73447	2.35621	1.16054	0.249663	-1.96255	7.43149	1 week	Hospitalisation		Perinatal	Observed richness
9	mat_AB_use_final_deliveryyes	-6.70369	3.76146	-1.7822	0.0789319	-14.202	0.79464	1 week	Intrapartum antibiotics		Parental	Observed richness
9	older_siblingsyes	3.27922	2.42378	1.35294	0.180309	-1.5525	8.11094	1 week	Older siblings		Environmental	Observed richness
9	pregn_weeks	2.63163	1.12497	2.33928	0.0220988	0.389038	4.87423	1 week	Gestational age	*	Perinatal	Observed richness
9	smoke_before_pregyes	-2.33973	2.92575	-0.799704	0.426513	-8.17211	3.49264	1 week	Prenatal smoking		Parental	Observed richness
10	(Intercept)	29.3629	6.22515	4.71683	1.12262e-05	16.9562	41.7696	1 week	NA	***	NA	Observed richness
10	atopy_fatheryes	2.26694	2.19086	1.03472	0.304213	-2.09944	6.63332	1 week	Father's atopy		Parental	Observed richness
10	breastfeeding_1_2wyes	-4.76458	4.05286	-1.17561	0.243572	-12.8419	3.31277	1 week	Breastfeeding		Dietary	Observed richness
10	delivery_typevaginal	-3.03079	3.40736	-0.889483	0.376665	-9.82165	3.76007	1 week	Delivery type		Perinatal	Observed richness
10	formulafeeding_1_2wyes	3.61013	2.6131	1.38155	0.171323	-1.59777	8.81802	1 week	Formulafeeding		Dietary	Observed richness
10	furrypet_home_yn_6myes	-2.81955	2.29043	-1.23101	0.22227	-7.38438	1.74528	1 week	Pets		Environmental	Observed richness
10	hospitalyes	2.77694	2.34979	1.18178	0.241127	-1.90618	7.46006	1 week	Hospitalisation		Perinatal	Observed richness
10	mat_AB_use_final_deliveryyes	-6.42358	3.73586	-1.71944	0.0897717	-13.8691	1.02197	1 week	Intrapartum antibiotics		Parental	Observed richness
10	older_siblingsyes	2.85836	2.36011	1.21111	0.229758	-1.84533	7.56204	1 week	Older siblings		Environmental	Observed richness
10	pregn_weeks	2.46629	1.10308	2.23583	0.0284206	0.267859	4.66472	1 week	Gestational age	*	Perinatal	Observed richness
11	(Intercept)	26.4911	5.3149	4.9843	3.96842e-06	15.9009	37.0813	1 week	NA	***	NA	Observed richness
11	atopy_fatheryes	2.11519	2.18112	0.969769	0.335321	-2.2308	6.46117	1 week	Father's atopy		Parental	Observed richness
11	breastfeeding_1_2wyes	-4.80074	4.04694	-1.18627	0.239312	-12.8644	3.26296	1 week	Breastfeeding		Dietary	Observed richness
11	formulafeeding_1_2wyes	4.1583	2.5358	1.63984	0.105283	-0.894389	9.21099	1 week	Formulafeeding		Dietary	Observed richness
11	furrypet_home_yn_6myes	-2.59241	2.27294	-1.14055	0.257734	-7.12134	1.93652	1 week	Pets		Environmental	Observed richness
[truncated: 1,678 more rows]

[truncated: 5 more sheets: Tbl11 - PERMANOVA, Tbl12 - LinDa, Tbl13 - LR_EI_observ, Tbl14_PERMANOVA_index_beta_dive, Tbl15 - LinDa post covid 44]
